# Supplementary material for: Tricking Arthrinium malaysianum into Producing Industrially Important Enzymes Under 2-Deoxy D-Glucose Treatment
Source: Front Microbiol. 2016 May 13;7:596. doi: 10.3389/fmicb.2016.00596 (PMC4865484; doi:10.3389/fmicb.2016.00596)
Supplement: Supplementary Table 3 — Differential expression analysis of 2-DG treated samples with control. Positive values indicate up-regulation under 2-DG and negative values indicate down-regulation. CAZY annotation, interproscan, and blast annotations are provided alongside. [file DataSheet3.xlsx]

## Sheet: Sheet1
SequenceID							Query-Length	Query-Pfam domains	Subject gi	Subject-Length	Subject-Pfam domains	Organism	CAZy Families	Domain Consistant	Length Consistant	Subject EC	Subject GenBankID
comp9779_c0_seq9	14.783	No hit					10664	RVT_1|DUF2236|NAD_binding_4	CAN82685.1	1576	RVT_1|Glucan_synthase	Vitis vinifera	GT48	NO	NO		A5AY60
comp9779_c0_seq10	14.7722	No hit					10755	RVT_1|DUF2236|NAD_binding_4	CAN82685.1	1576	RVT_1|Glucan_synthase	Vitis vinifera	GT48	NO	NO		A5AY60
comp7735_c0_seq2	13.7236	No hit					10983	Peptidase_S10|Methyltransf_23|MTS|Methyltransf_31|Ubie_methyltran|Methyltransf_18|Methyltransf_26|Methyltransf_25|Methyltransf_12|Sec7|DUF2841	ADG75248.1	647	Glycos_transf_1|Methyltransf_11	Cellulomonas flavigena DSM 20109	GT4	NO	NO		D5UHC7
comp5710_c0_seq2	13.3428	No hit					3947	FAD_binding_4|HET	AFY75432.1	473	FAD_binding_4|BBE	Synechococcus sp. PCC 7502	AA7	NO	NO
comp9087_c1_seq4	13.2471	No hit					10899	Glyco_hydro_42|Glyco_hydro_42M|FAD_binding_3|IF-2B|Peptidase_M36|FTP	CAP74321.1	837	Glyco_hydro_42|Glyco_hydro_42M	Penicillium chrysogenum Wisconsin 54-1255	GH42	NO	NO		B6H608
comp11274_c0_seq1	13.0529	No hit					935	n/a	AGG56590.1	511	B|B|B|B	Staphylococcus aureus AC1354	CBM50	n/a	NO
comp9087_c1_seq2	12.5086	No hit					11028	Glyco_hydro_42|Glyco_hydro_42M|FAD_binding_3|IF-2B|Peptidase_M36|FTP	CAP74321.1	837	Glyco_hydro_42|Glyco_hydro_42M	Penicillium chrysogenum Wisconsin 54-1255	GH42	NO	NO		B6H608
comp9779_c0_seq6	11.883	No hit					10820	RVT_1|DUF2236|NAD_binding_4	CAN82685.1	1576	RVT_1|Glucan_synthase	Vitis vinifera	GT48	NO	NO		A5AY60
comp9779_c0_seq5	11.8699	No hit					10729	RVT_1|DUF2236|NAD_binding_4	CAN82685.1	1576	RVT_1|Glucan_synthase	Vitis vinifera	GT48	NO	NO		A5AY60
comp6242_c0_seq1	11.7172	No hit					2748	Glyco_hydro_72	AEO61965.1	496	Glyco_hydro_72	Myceliophthora thermophila ATCC 42464	GH72	YES	NO
comp9779_c0_seq11	11.5736	No hit					10744	RVT_1|DUF2236|NAD_binding_4	CAN82685.1	1576	RVT_1|Glucan_synthase	Vitis vinifera	GT48	NO	NO		A5AY60
comp9779_c0_seq7	11.5573	No hit					10653	RVT_1|DUF2236|NAD_binding_4	CAN82685.1	1576	RVT_1|Glucan_synthase	Vitis vinifera	GT48	NO	NO		A5AY60
comp8348_c0_seq3	11.4321	No hit					4855	Abhydrolase_5|Abhydrolase_6|Fungal_trans|Zn_clus	BAE64464.1	1388	Fungal_trans	Aspergillus oryzae RIB40	GH28	NO	NO		Q2U1V1
comp4827_c0_seq2	11.3837	No hit					2591	p450	EAA66095.1	845	p450	Aspergillus nidulans FGSC A4	GT34	YES	NO		Q5BGV8
comp6308_c0_seq1	11.0954	No hit					1728	Abhydrolase_3	NP_298542.1	339	Abhydrolase_3	Xylella fastidiosa 9a5c	CE10	YES	NO		Q9PDX6
comp9670_c0_seq4	11.0765	No hit					9345	n/a	AEO59811.1	NA	n/a	Myceliophthora thermophila ATCC 42464	GH115	n/a	n/a
comp9556_c0_seq4	11.0688	No hit					8195	DUF3608|DEP	EAA59449.1	980	Glyco_hydro_18|adh_short	Aspergillus nidulans FGSC A4	GH18	NO	NO		Q5B652
comp9405_c0_seq1	10.6655	No hit					10990	n/a	AEO53326.1	NA	n/a	Myceliophthora thermophila ATCC 42464	GT90	n/a	n/a
comp9017_c0_seq9	10.6296	No hit					5184	OPT|GMC_oxred_C	CCA74023.1	627	GMC_oxred_N|GMC_oxred_C	Piriformospora indica	AA3	NO	NO
comp9627_c0_seq34	10.5768	No hit					5822	RF-1	BAE93687.1	1213	Glyco_hydro_66	Streptococcus criceti E49	GH66	NO	NO	3.2.1.11	Q1MVS0
comp9627_c0_seq34	10.5768	No hit					5822	RF-1	BAG16274.1	1213	Glyco_hydro_66	Streptococcus criceti ATCC 19642	GH66	NO	NO	3.2.1.11	A4F2S5B1Q2P0
comp9017_c0_seq6	10.4994	No hit					5022	OPT|GMC_oxred_C	CCA74023.1	627	GMC_oxred_N|GMC_oxred_C	Piriformospora indica	AA3	NO	NO
comp9505_c0_seq2	10.3563	No hit					5427	Ank_2|Ank_2|Ank_2|Ank_2|Ank_2|Ank_2|Ank_2|Ank_2|Ank_2|Ank_2|Ank_2|Ank_2|Ank_2	XP_362336.1	1732	Osmo_MPGsynth|Ank_2|Ank_2	Magnaporthe grisea 70-15	GT55	NO	NO
comp3159_c0_seq2	10.2791	No hit					1455	n/a	ADL47349.1	417	CBM_2	Micromonospora aurantiaca ATCC 27029	CBM2	n/a	NO		D9T0B3
comp9728_c0_seq10	10.2725	No hit					7054	GMC_oxred_C|GMC_oxred_N	CBI59551.1	540	GMC_oxred_C	Sordaria macrospora k-hell	AA3	NO	NO
comp9622_c0_seq8	10.1621	No hit					10478	adh_short|adh_short_C2|MFS_1|Sugar_tr|Sugar_tr|MFS_1|MFS_2|MFS_1|Peptidase_M28|p450	EAA66095.1	845	p450	Aspergillus nidulans FGSC A4	GT34	NO	NO		Q5BGV8
comp6866_c0_seq1	10.1404	No hit					2480	FAD_binding_4	AFM26333.1	472	FAD_binding_4	Desulfomonile tiedjei DSM 6799	AA7	YES	NO
comp7921_c0_seq4	10.0885	No hit					4607	HisKA|HATPase_c|Response_reg	NP_810096.1	1350	Glyco_tranf_2_3|HisKA|HATPase_c|Response_reg	Bacteroides thetaiotaomicron VPI-5482	GT2	NO	NO		Q8A8I4
comp8442_c0_seq4	10.0425	No hit					2706	Glyco_hydro_43	ABQ05056.2	353	Glyco_hydro_43	Flavobacterium johnsoniae UW101	GH43	YES	NO		A5FIB6
comp2578_c0_seq1	9.97878	No hit					1597	n/a	CAP85548.1	NA	n/a	Penicillium chrysogenum Wisconsin 54-1255	GT31	n/a	n/a		B6HEA7
comp6283_c0_seq2	9.81513	No hit					5110	MOSC_N	AEO57497.1	847	Glyco_hyd_65N_2	Myceliophthora thermophila ATCC 42464	GH95	NO	NO
comp9627_c0_seq21	9.75934	No hit					5755	RF-1	BAE93687.1	1213	Glyco_hydro_66	Streptococcus criceti E49	GH66	NO	NO	3.2.1.11	Q1MVS0
comp9627_c0_seq21	9.75934	No hit					5755	RF-1	BAG16274.1	1213	Glyco_hydro_66	Streptococcus criceti ATCC 19642	GH66	NO	NO	3.2.1.11	A4F2S5B1Q2P0
comp9735_c0_seq10	9.72091	No hit					2659	DEAD|Helicase_C	CAL53384.1	1058	DEAD|Helicase_C|LpxC	Ostreococcus tauri OTTH0595	CE11	NO	NO		Q017M7
comp7654_c0_seq2	9.72091	No hit					4246	AMP-binding	ACX49739.1	2318	Condensation|AMP-binding|AMP-binding_C|Condensation|HxxPF_rpt|AMP-binding|Glyco_hydro_4|Glyco_hydro_4C	uncultured marine bacterium 1n22	GH4	NO	NO		D2DIQ1
comp9680_c0_seq16	9.72091	No hit					7467	DUF3237	ADE82894.1	1609	Glyco_hydro_28|Glyco_hydro_88	Prevotella ruminicola 23	GH105|GH28	NO	NO		D5ET13
comp9124_c0_seq3	9.6914	No hit					3585	Glyco_hydro_61|Glyco_hydro_61	XP_369395.1	617	Glyco_hydro_61	Magnaporthe grisea 70-15	AA9|CBM18	NO	NO		G4N560
comp9627_c0_seq15	9.65109	No hit					5748	RF-1	BAE93687.1	1213	Glyco_hydro_66	Streptococcus criceti E49	GH66	NO	NO	3.2.1.11	Q1MVS0
comp9627_c0_seq15	9.65109	No hit					5748	RF-1	BAG16274.1	1213	Glyco_hydro_66	Streptococcus criceti ATCC 19642	GH66	NO	NO	3.2.1.11	A4F2S5B1Q2P0
comp7921_c0_seq1	9.6201	No hit					4551	HisKA|HATPase_c|Response_reg	NP_810096.1	1350	Glyco_tranf_2_3|HisKA|HATPase_c|Response_reg	Bacteroides thetaiotaomicron VPI-5482	GT2	NO	NO		Q8A8I4
comp9159_c0_seq9	9.58843	No hit					5319	Abhydrolase_6|Peptidase_S9	NP_127272.1	645	Peptidase_S9	Pyrococcus abyssi GE5	CE10	NO	NO	3.4.19.1	Q9UYB0
comp6308_c0_seq3	9.52293	No hit					1849	Abhydrolase_3	NP_298542.1	339	Abhydrolase_3	Xylella fastidiosa 9a5c	CE10	YES	NO		Q9PDX6
comp9693_c0_seq5	9.48903	No hit					2784	RCC1|Rad9|Rad9	BAK17762.1	810	RCC1	Solibacillus silvestris StLB046	CBM48	NO	NO
comp7939_c0_seq1	9.44256	No hit					3449	adh_short	EAA59449.1	980	Glyco_hydro_18|adh_short	Aspergillus nidulans FGSC A4	GH18	NO	NO		Q5B652
comp9355_c0_seq12	9.40669	No hit					2518	n/a	AEO55983.1	NA	n/a	Myceliophthora thermophila ATCC 42464	GH16	n/a	n/a
comp9693_c0_seq23	9.35744	No hit					2722	RCC1|Rad9|Rad9	BAK17762.1	810	RCC1	Solibacillus silvestris StLB046	CBM48	NO	NO
comp8725_c1_seq1	9.35744	No hit					1863	p450	EAA66095.1	845	p450	Aspergillus nidulans FGSC A4	GT34	YES	NO		Q5BGV8
comp9016_c1_seq1	9.2934	No hit					3960	Fungal_trans	EAA57990.1	1438	SKN1|Fungal_trans	Aspergillus nidulans FGSC A4	GH16	NO	NO		Q5AZS6
comp9533_c0_seq5	9.25358	No hit					2197	GMC_oxred_C|GMC_oxred_N	AGC65582.1	734	GMC_oxred_N	Simmondsia chinensis	AA3	NO	NO
comp8511_c0_seq2	9.2264	No hit					3980	Zn_clus|Fungal_trans	BAE64464.1	1388	Fungal_trans	Aspergillus oryzae RIB40	GH28	NO	NO		Q2U1V1
comp9779_c0_seq4	9.12241	No hit					10588	RVT_1|DUF2236|NAD_binding_4	CAN82685.1	1576	RVT_1|Glucan_synthase	Vitis vinifera	GT48	NO	NO		A5AY60
comp9680_c0_seq2	9.11227	No hit					7367	DUF3237	ADE82894.1	1609	Glyco_hydro_28|Glyco_hydro_88	Prevotella ruminicola 23	GH105|GH28	NO	NO		D5ET13
comp9693_c0_seq6	9.08226	No hit					3241	RCC1|Rad9	BAK17762.1	810	RCC1	Solibacillus silvestris StLB046	CBM48	NO	NO
comp9622_c0_seq27	9.06703	No hit					10539	adh_short|adh_short_C2|MFS_1|Sugar_tr|Sugar_tr|MFS_1|MFS_2|MFS_1|Peptidase_M28|p450	EAA66095.1	845	p450	Aspergillus nidulans FGSC A4	GT34	NO	NO		Q5BGV8
comp9622_c0_seq32	8.97205	No hit					10601	adh_short|adh_short_C2|MFS_1|Sugar_tr|Sugar_tr|MFS_1|MFS_2|MFS_1|Peptidase_M28|p450	EAA66095.1	845	p450	Aspergillus nidulans FGSC A4	GT34	NO	NO		Q5BGV8
comp9016_c1_seq5	8.90507	No hit					3885	Fungal_trans	EAA57990.1	1438	SKN1|Fungal_trans	Aspergillus nidulans FGSC A4	GH16	NO	NO		Q5AZS6
comp7179_c0_seq1	8.90507	No hit					1255	n/a	AFS12240.1	468	FAD_binding_4	Mycobacterium indicus pranii MTCC 9506	AA7	n/a	NO
comp8019_c0_seq3	8.81673	No hit					2249	Pro_isomerase	AFU57543.1	936	STT3|Pro_isomerase	Candidatus Nitrososphaera gargensis Ga9.2	GT66	NO	NO
comp9779_c0_seq13	8.79839	No hit					6373	RVT_1|DUF2236	CAN82685.1	1576	RVT_1|Glucan_synthase	Vitis vinifera	GT48	NO	NO		A5AY60
comp9677_c0_seq6	8.74194	No hit					4051	Glyco_hydro_20	AAP01161.1	594	Glycohydro_20b2|Glyco_hydro_20	Fusarium venenatum	GH20	NO	NO
comp4857_c0_seq1	8.62194	No hit					1062	Glyco_hydro_61	ACR92640.1	243	Glyco_hydro_61	Trichoderma reesei QM6A	AA9	YES	NO		Q7Z9M7
comp9479_c0_seq5	8.62194	No hit					3855	Glyco_hydro_75	XP_330097.1	588	Glyco_hydro_75	Neurospora crassa OR74A	GH75	YES	NO		Q7SHJ5
comp9159_c0_seq7	8.57961	No hit					4345	Abhydrolase_6|Peptidase_S9	NP_127272.1	645	Peptidase_S9	Pyrococcus abyssi GE5	CE10	NO	NO	3.4.19.1	Q9UYB0
comp7818_c0_seq4	8.46802	No hit					2926	Glyco_hydro_72	CAP70736.1	450	Glyco_hydro_72	Podospora anserina S mat+	GH72	YES	NO		B2B111
comp9693_c0_seq21	8.46802	No hit					3167	RCC1|Rad9|Rad9	BAK17762.1	810	RCC1	Solibacillus silvestris StLB046	CBM48	NO	NO
comp9355_c0_seq5	8.39667	No hit					2438	n/a	AEO55983.1	NA	n/a	Myceliophthora thermophila ATCC 42464	GH16	n/a	n/a
comp8424_c0_seq2	8.39667	No hit					5343	SPRY|Ank_2|Ank_2|Ank_2|Ank_4|Ank_2|Ank_2	XP_362336.1	1732	Osmo_MPGsynth|Ank_2|Ank_2	Magnaporthe grisea 70-15	GT55	NO	NO
comp9519_c0_seq6	8.34707	No hit					1924	p450	EAA66095.1	845	p450	Aspergillus nidulans FGSC A4	GT34	YES	NO		Q5BGV8
comp8926_c0_seq5	8.32162	No hit					3813	adh_short|adh_short_C2|UBACT|UBA_e1_thiolCys|ThiF	EAA62552.1	1087	Glyco_hydro_92|adh_short_C2	Aspergillus nidulans FGSC A4	GH92	NO	NO		Q5B238
comp9693_c0_seq11	8.2957	No hit					3105	RCC1|Rad9|Rad9	BAK17762.1	810	RCC1	Solibacillus silvestris StLB046	CBM48	NO	NO
comp9634_c0_seq1	8.2957	No hit					2193	Glyco_hydro_62	BAE62533.1	341	Glyco_hydro_62	Aspergillus oryzae RIB40	GH62	YES	NO		Q2U7D2
comp7818_c0_seq1	8.21505	No hit					1822	Glyco_hydro_72	CAP70736.1	450	Glyco_hydro_72	Podospora anserina S mat+	GH72	YES	NO		B2B111
comp9124_c0_seq1	8.21505	No hit					3530	Glyco_hydro_61|Glyco_hydro_61	XP_369395.1	617	Glyco_hydro_61	Magnaporthe grisea 70-15	AA9|CBM18	NO	NO		G4N560
comp9017_c0_seq11	8.18713	No hit					5332	OPT|GMC_oxred_C	CCA74023.1	627	GMC_oxred_N|GMC_oxred_C	Piriformospora indica	AA3	NO	NO
comp9670_c0_seq3	8.12961	No hit					9405	n/a	AEO59811.1	NA	n/a	Myceliophthora thermophila ATCC 42464	GH115	n/a	n/a
comp9130_c0_seq6	7.338	No hit					3292	Response_reg|HSF_DNA-bind	NP_810096.1	1350	Glyco_tranf_2_3|HisKA|HATPase_c|Response_reg	Bacteroides thetaiotaomicron VPI-5482	GT2	NO	NO		Q8A8I4
comp6866_c0_seq2	6.9433	No hit					2405	FAD_binding_4	AFM26333.1	472	FAD_binding_4	Desulfomonile tiedjei DSM 6799	AA7	YES	NO
comp10272_c0_seq1	6.62782	No hit					3641	Pectate_lyase_3	AAL84695.1	775	Pectate_lyase_3	Trichoderma virens	GH55	YES	NO	3.2.1.39	Q8TG98
comp6502_c0_seq2	6.23665	No hit					2199	n/a	AEO65538.1	587	fn3_3|CBM-like	Thielavia terrestris NRRL 8126	PL4	n/a	NO
comp8664_c0_seq1	5.94852	No hit					5820	ketoacyl-synt|Ketoacyl-synt_C|Acyl_transf_1|adh_short|PP-binding	AFY93865.1	2649	Glycos_transf_2|AMP-binding|AMP-binding_C|ketoacyl-synt|Ketoacyl-synt_C|Acyl_transf_1|Aminotran_3	Chamaesiphon minutus PCC 6605	GT2	NO	NO
comp7459_c0_seq1	5.78491	No hit					1729	Glyco_hydro_43	XP_359855.1	374	Glyco_hydro_43	Magnaporthe grisea 70-15	GH43	YES	NO		G4N350
comp9622_c0_seq10	5.5996	No hit					10762	adh_short|adh_short_C2|MFS_1|Sugar_tr|Sugar_tr|MFS_1|MFS_2|MFS_1|Peptidase_M28|p450	EAA66095.1	845	p450	Aspergillus nidulans FGSC A4	GT34	NO	NO		Q5BGV8
comp10998_c0_seq1	5.56005	No hit					2887	Lipase_GDSL|Lipase_GDSL_2	CAP67115.1	412	Lipase_GDSL	Podospora anserina S mat+	CE3	NO	NO		B2ARU5
comp5732_c1_seq1	5.46469	No hit					4086	adh_short	AEM71370.1	2409	Malectin	Muricauda ruestringensis DSM 13258	CBM57	NO	NO
comp2911_c0_seq1	5.43304	No hit					1709	FAD_binding_4	AGG60232.1	464	FAD_binding_4|BBE	Bacillus subtilis subsp. subtilis 6051-HGW	AA7	NO	NO
comp2911_c0_seq1	5.43304	No hit					1709	FAD_binding_4	AFQ56798.1	464	FAD_binding_4|BBE	Bacillus subtilis QB928	AA7	NO	NO
comp2911_c0_seq1	5.43304	No hit					1709	FAD_binding_4	BAM49801.1	464	FAD_binding_4|BBE	Bacillus subtilis BEST7613	AA7	NO	NO
comp2911_c0_seq1	5.43304	No hit					1709	FAD_binding_4	BAM57070.1	464	FAD_binding_4|BBE	Bacillus subtilis BEST7003	AA7	NO	NO
comp3061_c0_seq1	5.2591	No hit					1243	Glyco_hydro_61	XP_359989.1	337	Glyco_hydro_61	Magnaporthe grisea 70-15	AA9	YES	NO
comp41698_c0_seq1	5.12021	No hit					1602	Epimerase	CAP67203.1	NA	n/a	Podospora anserina S mat+	CE12	n/a	n/a		B2AS32
comp6788_c0_seq1	4.9688	No hit					1966	Pyr_redox_2|Pyr_redox_3|FMO-like|K_oxygenase	NP_051574.1	847	Abhydrolase_3|Pyr_redox_3	Deinococcus radiodurans R1	CE10	NO	NO		Q9RZT0
comp3322_c0_seq2	4.78762	No hit					1194	But2	CBX90501.1	574	But2	Leptosphaeria maculans v23.1.3	GH17	YES	NO		E4ZGT1
comp9567_c0_seq5	4.76593	No hit					1543	FAD_binding_4	AFT99467.1	495	FAD_binding_4	Nocardia brasiliensis ATCC 700358 HUJEG-1	AA7	YES	NO
comp5975_c0_seq1	4.63919	No hit					4391	Chal_sti_synt_N|Chal_sti_synt_C|Glyco_hydro_61	AEO56016.1	259	Glyco_hydro_61	Myceliophthora thermophila ATCC 42464	AA9	NO	NO
comp10088_c0_seq1	4.49627	No hit					1207	n/a	CCK24774.1	309	DPBB_1	Streptomyces davawensis JCM 4913	CBM5	n/a	NO
comp9622_c0_seq19	4.43781	No hit					10823	adh_short|adh_short_C2|MFS_1|Sugar_tr|Sugar_tr|MFS_1|MFS_2|MFS_1|Peptidase_M28|p450	EAA66095.1	845	p450	Aspergillus nidulans FGSC A4	GT34	NO	NO		Q5BGV8
comp10209_c0_seq1	4.39423	No hit					2890	DUF1929	CCD44761.1	649	F5_F8_type_C|DUF1929	Botryotinia fuckeliana	CBM32|AA5	NO	NO
comp8793_c0_seq4	4.24797	No hit					2309	DUF4246	EAA59719.1	1318	DUF4246|Glyco_hydro_75	Aspergillus nidulans FGSC A4	GH75	NO	NO		Q5AUD3
comp5732_c1_seq2	4.23624	No hit					4176	adh_short	AEM71370.1	2409	Malectin	Muricauda ruestringensis DSM 13258	CBM57	NO	NO
comp8489_c0_seq2	4.18223	No hit					16252	AMP-binding|AMP-binding|Condensation|AMP-binding|Condensation|Condensation|AMP-binding|Condensation|Condensation|Condensation	AFY93865.1	2649	Glycos_transf_2|AMP-binding|AMP-binding_C|ketoacyl-synt|Ketoacyl-synt_C|Acyl_transf_1|Aminotran_3	Chamaesiphon minutus PCC 6605	GT2	NO	NO
comp8704_c0_seq4	4.11735	No hit					8448	Peptidase_S9|EAP30|Vps36_ESCRT-II	NP_127272.1	645	Peptidase_S9	Pyrococcus abyssi GE5	CE10	NO	NO	3.4.19.1	Q9UYB0
comp9893_c0_seq1	4.04116	No hit					4495	FMN_red|Flavodoxin_1|MFS_1|MFS_2|MFS_1	CAP60339.1	NA	n/a	Podospora anserina S mat+	AA6	n/a	n/a
comp8607_c1_seq1	4.04024	No hit					468	n/a	CAK40717.1	566	GMC_oxred_N|GMC_oxred_C	Aspergillus niger CBS 513.88	AA3	n/a	YES		A2QWL3
comp9779_c0_seq8	3.8763	No hit					10679	RVT_1|DUF2236|NAD_binding_4	CAN82685.1	1576	RVT_1|Glucan_synthase	Vitis vinifera	GT48	NO	NO		A5AY60
comp7471_c0_seq1	3.86069	No hit					2156	p450	EAA66095.1	845	p450	Aspergillus nidulans FGSC A4	GT34	YES	NO		Q5BGV8
comp5901_c0_seq1	3.78885	No hit					463	n/a	XP_367381.1	NA	n/a	Magnaporthe grisea 70-15	GH16	n/a	n/a		G4MUZ8
comp9513_c0_seq2	3.67986	No hit					3307	MFS_1|TRI12|MFS_1|FMO-like|Pyr_redox_3	NP_051574.1	847	Abhydrolase_3|Pyr_redox_3	Deinococcus radiodurans R1	CE10	NO	NO		Q9RZT0
comp6605_c1_seq1	3.65986	No hit					2651	Lipase_GDSL_2	XP_323879.1	293	Lipase_GDSL_2	Neurospora crassa OR74A	CE3	YES	NO		Q7RY37
comp6707_c0_seq1	3.63586	No hit					1547	Amidohydro_3|Amidohydro_1|Amidohydro_4|Amidohydro_5	ACU40719.1	398	Amidohydro_1	Actinosynnema mirum DSM 43827	CE9	NO	NO		C6WR26
comp12214_c0_seq1	3.62836	No hit					1575	Glyco_hydro_61	CAP66744.1	358	Glyco_hydro_61	Podospora anserina S mat+	AA9	YES	NO		B2ARG6
comp3557_c0_seq1	3.58527	No hit					1432	n/a	EAK81513.1	841	Cellulase	Ustilago maydis 521	GH5	n/a	NO
comp21124_c0_seq1	3.57673	No hit					1644	CBM_1|Cellulase	AEO70679.1	403	Cellulase	Thielavia terrestris NRRL 8126	GH5|CBM1	NO	NO
comp8411_c0_seq5	3.56997	No hit					3764	Peptidase_S8|Peptidase_S8	ACA88898.1	712	Peptidase_S8	Shewanella woodyi ATCC 51908	CBM5	NO	NO		B1KM18
comp6605_c1_seq2	3.53152	No hit					2118	Lipase_GDSL_2	XP_323879.1	293	Lipase_GDSL_2	Neurospora crassa OR74A	CE3	YES	NO		Q7RY37
comp7921_c0_seq3	3.48618	No hit					4642	HisKA|HATPase_c|Response_reg	NP_810096.1	1350	Glyco_tranf_2_3|HisKA|HATPase_c|Response_reg	Bacteroides thetaiotaomicron VPI-5482	GT2	NO	NO		Q8A8I4
comp6636_c0_seq2	3.4397	No hit					4796	Beta-lactamase	CBH23370.1	992	Glyco_hydro_3|Beta-lactamase	Salinibacter ruber M8	GH3	NO	NO
comp6636_c0_seq2	3.4397	No hit					4796	Beta-lactamase	ABC45027.1	992	Glyco_hydro_3|Beta-lactamase	Salinibacter ruber DSM 13855 M31	GH3	NO	NO		Q2S5L3
comp12658_c0_seq1	3.33599	No hit					1637	LIP	ADU49754.1	734	NPCBM|NPCBM|LIP	Intrasporangium calvum DSM 43043	CBM51	NO	NO
comp4290_c1_seq1	3.30044	No hit					8058	Glyco_hydro_2_N|Glyco_hydro_2|Glyco_hydro_2_C|Bgal_small_N|IBR	AEO64183.1	1077	Glyco_hydro_2_N|Glyco_hydro_2_C|Bgal_small_N	Thielavia terrestris NRRL 8126	GH2	NO	NO
comp9622_c0_seq13	3.18696	No hit					10885	adh_short|adh_short_C2|MFS_1|Sugar_tr|Sugar_tr|MFS_1|MFS_2|MFS_1|Peptidase_M28|p450	EAA66095.1	845	p450	Aspergillus nidulans FGSC A4	GT34	NO	NO		Q5BGV8
comp7836_c0_seq1	3.14514	No hit					2988	PAP2_3	AGI90878.1	714	DUF2029|PAP2_3	Streptomyces albus J1074	GT87	NO	NO
comp6966_c0_seq1	3.13307	No hit					3381	Gal_mutarotas_2|Glyco_hydro_31|Glyco_hydro_31	ACB13188.1	913	Glyco_hydro_31	Thermomyces lanuginosus	GH31	NO	NO		B1Q1F4
comp3653_c0_seq2	3.11747	No hit					2132	Lipase_GDSL_2	CBG67294.1	559	RicinB_lectin_2|Lipase_GDSL_2	Streptomyces scabiei 87.22	CBM13	NO	NO		C9ZBE8
comp13334_c0_seq1	2.993	no hit					2959	p450	EAA66095.1	845	p450	Aspergillus nidulans FGSC A4	GT34	YES	NO		Q5BGV8
comp6262_c0_seq2	2.87734	no hit					2637	p450	EAA66095.1	845	p450	Aspergillus nidulans FGSC A4	GT34	YES	NO		Q5BGV8
comp9448_c0_seq1	2.8332	no hit					10896	RRM_5|RRM_6|Pro_isomerase	AFU57543.1	936	STT3|Pro_isomerase	Candidatus Nitrososphaera gargensis Ga9.2	GT66	NO	NO
comp9680_c0_seq34	2.8286	no hit					7882	DUF3237	ADE82894.1	1609	Glyco_hydro_28|Glyco_hydro_88	Prevotella ruminicola 23	GH105|GH28	NO	NO		D5ET13
comp3086_c0_seq1	2.8145	no hit					1860	p450	EAA66095.1	845	p450	Aspergillus nidulans FGSC A4	GT34	YES	NO		Q5BGV8
comp4934_c0_seq1	2.77808	no hit					1867	Helicase_C|DEAD	CAL53384.1	1058	DEAD|Helicase_C|LpxC	Ostreococcus tauri OTTH0595	CE11	NO	NO		Q017M7
comp6197_c0_seq2	2.77802	no hit					2827	n/a	BAE60328.1	NA	n/a	Aspergillus oryzae RIB40	GH93	n/a	n/a		Q2UDN7
comp13519_c0_seq1	-2.7445	no hit					1860	LIP	ADU49754.1	734	NPCBM|NPCBM|LIP	Intrasporangium calvum DSM 43043	CBM51	NO	NO
comp7792_c0_seq2	-2.8574	no hit					4960	Trehalose_PPase|Glyco_transf_20	ACM42400.1	1021	Glyco_transf_20|Trehalose_PPase	Chaetomium chiversii CS-36-62	GT20	NO	NO		C5H879
comp12605_c0_seq1	-2.88414	no hit					1926	n/a	BAJ75231.1	NA	n/a	Microbacterium testaceum StLB037	GH18	n/a	n/a
comp9017_c0_seq2	-2.9046	no hit					5928	OPT|GMC_oxred_C	CCA74023.1	627	GMC_oxred_N|GMC_oxred_C	Piriformospora indica	AA3	NO	NO
comp22854_c0_seq1	-2.91559	no hit					1503	Glyco_hydro_cc	CCT61160.1	346	Glyco_hydro_cc	Leptosphaeria maculans JN3	GH128	YES	NO
comp9088_c0_seq1	-2.93902	no hit					4173	Peptidase_S8	ACX42259.1	591	Peptidase_S8	Paenibacillus dendritiformis T451	CBM12	YES	NO		D0EVD2
comp5990_c0_seq1	-3.01112	no hit					2938	DUF1034|Peptidase_S8|Peptidase_S8	ACV48841.1	682	Peptidase_S8	Halomicrobium mukohataei DSM 12286	CBM5	NO	NO		C7P049
comp16245_c0_seq1	-3.02006	no hit					2975	Peptidase_S8|Peptidase_S8	ACV48841.1	682	Peptidase_S8	Halomicrobium mukohataei DSM 12286	CBM5	NO	NO		C7P049
comp5852_c0_seq4	-3.0828	no hit					2041	Lipase_GDSL_2|Lipase_GDSL	AEO66483.1	274	Lipase_GDSL_2	Thielavia terrestris NRRL 8126	CE3	NO	NO
comp3205_c1_seq1	-3.11264	no hit					4565	TRAM_LAG1_CLN8|Alpha-L-AF_C	XP_368097.1	681	Alpha-L-AF_C	Magnaporthe grisea 70-15	GH51	NO	NO		G4NBZ0
comp4130_c0_seq1	-3.13871	no hit					2948	Glyco_hydro_7|CBM_1	AFJ54162.1	473	Glyco_hydro_7	Aspergillus fumigatus MKU1	GH7|CBM1	NO	NO
comp9728_c0_seq19	-3.14198	no hit					3746	GMC_oxred_C	XP_369636.1	NA	n/a	Magnaporthe grisea 70-15	CE4	n/a	n/a		G4N3M4
comp8345_c0_seq1	-3.16937	no hit					3119	Glyco_hydro_7	CAP71774.1	295	Lipase_GDSL_2	Podospora anserina S mat+	CE3	NO	NO		B2B3T8
comp12355_c0_seq1	-3.28438	no hit					3726	VCBS|Lipase_GDSL_2|Lipase_GDSL	AEO70515.1	973	Lipase_GDSL_2	Thielavia terrestris NRRL 8126	CE3	NO	NO
comp8359_c0_seq1	-3.2905	no hit					336	n/a	AEO69988.1	524	Glyco_tranf_2_3	Thielavia terrestris NRRL 8126	GT2	n/a	NO
comp4136_c0_seq1	-3.29114	no hit					4481	SUN	AEO65351.1	435	SUN	Thielavia terrestris NRRL 8126	GH132	YES	NO
comp3167_c0_seq2	-3.29835	no hit					2780	Glyco_hydro_92	EAA63625.1	808	Glyco_hydro_92	Aspergillus nidulans FGSC A4	GH92	YES	NO		Q5B8S6
comp5837_c0_seq2	-3.30568	no hit					5569	Pkinase_Tyr	AGI90727.1	600	Pkinase	Streptomyces albus J1074	CBM13	NO	NO
comp6509_c0_seq1	-3.30716	no hit					2727	p450	EAA66095.1	845	p450	Aspergillus nidulans FGSC A4	GT34	YES	NO		Q5BGV8
comp4141_c0_seq2	-3.3228	no hit					2842	Fungal_trans|Zn_clus	BAE64464.1	1388	Fungal_trans	Aspergillus oryzae RIB40	GH28	NO	NO		Q2U1V1
comp9574_c0_seq29	-3.32693	no hit					4292	Fungal_trans|Zn_clus	BAE64464.1	1388	Fungal_trans	Aspergillus oryzae RIB40	GH28	NO	NO		Q2U1V1
comp8345_c0_seq2	-3.3978	no hit					3060	Glyco_hydro_7	CAP71774.1	295	Lipase_GDSL_2	Podospora anserina S mat+	CE3	NO	NO		B2B3T8
comp7792_c0_seq4	-3.4203	no hit					4823	Trehalose_PPase|Glyco_transf_20	ACM42400.1	1021	Glyco_transf_20|Trehalose_PPase	Chaetomium chiversii CS-36-62	GT20	NO	NO		C5H879
comp7270_c0_seq2	-3.42223	no hit					5074	Peptidase_S8|Peptidase_S8|DUF1034	ABG39167.1	891	Peptidase_S8	Pseudoalteromonas atlantica T6c	CBM67	NO	NO
comp9346_c0_seq7	-3.45924	no hit					6022	Frag1|p450	EAA66095.1	845	p450	Aspergillus nidulans FGSC A4	GT34	NO	NO		Q5BGV8
comp4897_c0_seq2	-3.46741	no hit					2177	p450|p450	EAA66095.1	845	p450	Aspergillus nidulans FGSC A4	GT34	NO	NO		Q5BGV8
comp9680_c0_seq14	-3.48928	no hit					7820	DUF3237	ADE82894.1	1609	Glyco_hydro_28|Glyco_hydro_88	Prevotella ruminicola 23	GH105|GH28	NO	NO		D5ET13
comp8772_c0_seq4	-3.56836	no hit					2953	p450	EAA66095.1	845	p450	Aspergillus nidulans FGSC A4	GT34	YES	NO		Q5BGV8
comp9677_c0_seq16	-3.58044	no hit					2666	Glyco_hydro_20	AEO53435.1	595	Glycohydro_20b2|Glyco_hydro_20	Myceliophthora thermophila ATCC 42464	GH20	NO	NO
comp4703_c0_seq1	-3.61258	no hit					2531	n/a	CCD48322.1	785	Glyco_hydro_3|Glyco_hydro_3_C	Botryotinia fuckeliana	GH3	n/a	NO
comp5805_c0_seq1	-3.62748	no hit					6143	HATPase_c|Response_reg	NP_810096.1	1350	Glyco_tranf_2_3|HisKA|HATPase_c|Response_reg	Bacteroides thetaiotaomicron VPI-5482	GT2	NO	NO		Q8A8I4
comp4607_c0_seq2	-3.66486	no hit					3214	SUN|SUN	CCD55279.1	541	SUN	Botryotinia fuckeliana	GH132	NO	NO
comp3241_c0_seq1	-3.72463	no hit					4469	Cu-oxidase_3|Cu-oxidase|Cu-oxidase_2|PIP5K	ACF87826.1	593	Cu-oxidase_3|Cu-oxidase|Cu-oxidase_2	Zea mays B73	AA1	NO	NO
comp3241_c0_seq1	-3.72463	no hit					4469	Cu-oxidase_3|Cu-oxidase|Cu-oxidase_2|PIP5K	ACF85373.1	593	Cu-oxidase_3|Cu-oxidase|Cu-oxidase_2	Zea mays B73	AA1	NO	NO
comp9460_c0_seq9	-3.7773	no hit					2761	n/a	AEO55402.1	NA	n/a	Myceliophthora thermophila ATCC 42464	GH43|CBM35	n/a	n/a
comp66237_c0_seq1	-3.82449	no hit					1049	Glyco_hydro_3	BAI82526.1	818	Glyco_hydro_3|Glyco_hydro_3_C	Aureobasidium pullulans var. melanogenum ATCC 20524	GH3	NO	NO	3.2.1.37	D4AHT5
comp7210_c0_seq1	-3.8998	no hit					1962	p450	EAA66095.1	845	p450	Aspergillus nidulans FGSC A4	GT34	YES	NO		Q5BGV8
comp9087_c1_seq3	-3.92649	no hit					11109	Glyco_hydro_42|Glyco_hydro_42M|FAD_binding_3|IF-2B|Peptidase_M36|FTP	CAP74321.1	837	Glyco_hydro_42|Glyco_hydro_42M	Penicillium chrysogenum Wisconsin 54-1255	GH42	NO	NO		B6H608
comp9271_c0_seq1	-3.93543	no hit					3134	n/a	AEO64229.1	968	Glyco_hydro_3	Thielavia terrestris NRRL 8126	GH3	n/a	NO
comp9460_c0_seq21	-4.03825	no hit					3014	n/a	BAE60540.1	NA	n/a	Aspergillus oryzae RIB40	GH43	n/a	n/a		Q2UD25
comp33166_c0_seq1	-4.05664	no hit					1390	Lipase_GDSL_2|Lipase_GDSL	XP_366258.1	NA	n/a	Magnaporthe grisea 70-15	CE3	n/a	n/a		G4MYF2
comp9680_c0_seq31	-4.12979	no hit					7889	DUF3237	ADE82894.1	1609	Glyco_hydro_28|Glyco_hydro_88	Prevotella ruminicola 23	GH105|GH28	NO	NO		D5ET13
comp9130_c0_seq7	-4.14722	no hit					3401	Response_reg|HSF_DNA-bind	NP_810096.1	1350	Glyco_tranf_2_3|HisKA|HATPase_c|Response_reg	Bacteroides thetaiotaomicron VPI-5482	GT2	NO	NO		Q8A8I4
comp8696_c0_seq3	-4.15969	no hit					2732	Cellulase	AEO69593.1	433	Cellulase	Thielavia terrestris NRRL 8126	GH5	YES	NO
comp8862_c0_seq1	-4.20154	no hit					2755	Drf_FH1	AGE49160.1	506	Chitin_bind_3|Barwin	Acanthocystis turfacea Chlorella virus Br0604L	CBM14	NO	NO
comp9574_c0_seq14	-4.23403	no hit					4175	Fungal_trans|Zn_clus	BAE64464.1	1388	Fungal_trans	Aspergillus oryzae RIB40	GH28	NO	NO		Q2U1V1
comp7696_c0_seq1	-4.32271	no hit					3671	Glyco_hydro_92	AEO55022.1	838	Glyco_hydro_92	Myceliophthora thermophila ATCC 42464	GH92	YES	NO
comp9405_c0_seq2	-4.36791	no hit					10716	n/a	AEO53326.1	NA	n/a	Myceliophthora thermophila ATCC 42464	GT90	n/a	n/a
comp8583_c0_seq3	-4.42091	no hit					2920	Helicase_C|DEAD	ACS45199.1	603	Cu-oxidase_3|Cu-oxidase|Cu-oxidase_2	Trichoderma sp. T01	AA1	NO	NO
comp7470_c0_seq5	-4.50751	no hit					1365	Cellulase	AEO67179.1	363	Cellulase	Thielavia terrestris NRRL 8126	GH5	YES	NO
comp9263_c0_seq8	-4.61917	no hit					6446	Amidohydro_2|Fungal_trans|Zn_clus	BAE64464.1	1388	Fungal_trans	Aspergillus oryzae RIB40	GH28	NO	NO		Q2U1V1
comp14777_c0_seq1	-4.64275	no hit					903	Glyco_hydro_7	CAJ75962.1	427	Glyco_hydro_7	Rasamsonia emersonii	GH7	YES	NO
comp10204_c0_seq1	-4.69291	no hit					1716	adh_short	EAA59449.1	980	Glyco_hydro_18|adh_short	Aspergillus nidulans FGSC A4	GH18	NO	NO		Q5B652
comp9460_c0_seq18	-4.82276	no hit					2866	n/a	AEO55402.1	NA	n/a	Myceliophthora thermophila ATCC 42464	GH43|CBM35	n/a	n/a
comp9584_c0_seq1	-4.91868	no hit					3948	Peptidase_M4|Peptidase_M4_C	BAE62388.1	NA	n/a	Aspergillus oryzae RIB40	CBM63	n/a	n/a		Q2U7S7
comp9574_c0_seq24	-4.92833	no hit					4158	Fungal_trans|Zn_clus	BAE64464.1	1388	Fungal_trans	Aspergillus oryzae RIB40	GH28	NO	NO		Q2U1V1
comp9680_c0_seq13	-5.00187	no hit					7720	DUF3237	ADE82894.1	1609	Glyco_hydro_28|Glyco_hydro_88	Prevotella ruminicola 23	GH105|GH28	NO	NO		D5ET13
comp7524_c0_seq1	-5.06893	no hit					2561	Glyco_hydro_92	EAA63625.1	808	Glyco_hydro_92	Aspergillus nidulans FGSC A4	GH92	YES	NO		Q5B8S6
comp7210_c0_seq2	-5.10405	no hit					2036	p450	EAA66095.1	845	p450	Aspergillus nidulans FGSC A4	GT34	YES	NO		Q5BGV8
comp7823_c0_seq2	-5.4251	no hit					2209	n/a	XP_365897.1	1112	Glyco_transf_22|FAD_binding_4	Magnaporthe grisea 70-15	GT22	n/a	NO
comp9574_c0_seq27	-5.48021	no hit					4177	Fungal_trans|Zn_clus	BAE64464.1	1388	Fungal_trans	Aspergillus oryzae RIB40	GH28	NO	NO		Q2U1V1
comp9680_c0_seq24	-5.57862	no hit					7789	DUF3237	ADE82894.1	1609	Glyco_hydro_28|Glyco_hydro_88	Prevotella ruminicola 23	GH105|GH28	NO	NO		D5ET13
comp53019_c0_seq1	-6.13752	no hit					760	Chitin_bind_1	CAP67127.1	NA	n/a	Podospora anserina S mat+	CBM18	n/a	n/a		B2ARV7
comp9574_c0_seq4	-6.42229	no hit					4234	Fungal_trans|Zn_clus	BAE64464.1	1388	Fungal_trans	Aspergillus oryzae RIB40	GH28	NO	NO		Q2U1V1
comp9727_c0_seq32	-7.92417	no hit					7131	MFS_1|Sugar_tr|Acetyltransf_3|DUF3445	EAA65371.1	1001	Glyco_transf_22|DUF3445	Aspergillus nidulans FGSC A4	GT22	NO	NO		Q5BFF1
comp9680_c0_seq21	-7.92417	no hit					7586	DUF3237	ADE82894.1	1609	Glyco_hydro_28|Glyco_hydro_88	Prevotella ruminicola 23	GH105|GH28	NO	NO		D5ET13
comp9728_c0_seq22	-8.00186	no hit					6993	GMC_oxred_C|GMC_oxred_N	AEO61303.1	537	GMC_oxred_N		AA3	NO	NO
comp2939_c0_seq2	-8.04756	no hit					1416	n/a	BAE66503.1	NA	n/a	Aspergillus oryzae RIB40	GT25	n/a	n/a		Q2TW70
comp9265_c0_seq14	-8.07558	no hit					5464	ICln_channel	AEO56549.1	756	Voldacs	Myceliophthora thermophila ATCC 42464	GT31	NO	NO
comp6502_c0_seq1	-8.2126	no hit					2198	n/a	AEO65538.1	587	fn3_3|CBM-like	Thielavia terrestris NRRL 8126	PL4	n/a	NO
comp9728_c0_seq12	-8.27652	no hit					7116	GMC_oxred_C|GMC_oxred_N	AEO61303.1	537	GMC_oxred_N		AA3	NO	NO
comp9616_c0_seq5	-8.33773	no hit					2469	Cellulase	AEO68439.1	439	Cellulase	Thielavia terrestris NRRL 8126	GH5	YES	NO
comp7137_c0_seq1	-8.50716	no hit					885	Glyco_hydro_72	XP_362679.1	547	Glyco_hydro_72|X8	Magnaporthe grisea 70-15	GH72|CBM43	NO	NO		G4MWC3
comp9693_c0_seq13	-8.55948	no hit					2861	RCC1|Rad9|Rad9	BAK17762.1	810	RCC1	Solibacillus silvestris StLB046	CBM48	NO	NO
comp9728_c0_seq24	-8.65876	no hit					7166	GMC_oxred_C|GMC_oxred_N	AEO61303.1	537	GMC_oxred_N		AA3	NO	NO
comp9497_c0_seq5	-8.75165	no hit					2161	Sugar_tr|MFS_1	CCA21934.1	2288	FKS1_dom1|Glucan_synthase|Sugar_tr	Albugo laibachii Nc14	GT48	NO	YES
comp9728_c0_seq23	-8.88064	no hit					7289	GMC_oxred_C|GMC_oxred_N	AEO61303.1	537	GMC_oxred_N		AA3	NO	NO
comp9265_c0_seq9	-8.88064	no hit					3825	ICln_channel	AEO56549.1	756	Voldacs	Myceliophthora thermophila ATCC 42464	GT31	NO	NO
comp9680_c0_seq18	-8.96065	no hit					7674	DUF3237	ADE82894.1	1609	Glyco_hydro_28|Glyco_hydro_88	Prevotella ruminicola 23	GH105|GH28	NO	NO		D5ET13
comp9727_c0_seq17	-8.96065	no hit					7125	MFS_1|Sugar_tr|Acetyltransf_3|DUF3445	EAA65371.1	1001	Glyco_transf_22|DUF3445	Aspergillus nidulans FGSC A4	GT22	NO	NO		Q5BFF1
comp7380_c1_seq1	-9.07291	no hit					1833	Ank_2|Ank_2|Ank_2	XP_362336.1	1732	Osmo_MPGsynth|Ank_2|Ank_2	Magnaporthe grisea 70-15	GT55	NO	YES
comp9680_c0_seq48	-9.10847	no hit					5230	DUF3237	ADE82894.1	1609	Glyco_hydro_28|Glyco_hydro_88	Prevotella ruminicola 23	GH105|GH28	NO	NO		D5ET13
comp5844_c0_seq1	-9.12908	no hit					3283	Ank_2|Ank_2|Ank_2|Ank_2|Ank_2|Ank_2|Ank_2|Ank_2|Ank_2	XP_362336.1	1732	Osmo_MPGsynth|Ank_2|Ank_2	Magnaporthe grisea 70-15	GT55	NO	NO
comp9460_c0_seq6	-9.14317	no hit					2851	n/a	AEO55402.1	NA	n/a	Myceliophthora thermophila ATCC 42464	GH43|CBM35	n/a	n/a
comp9727_c0_seq58	-9.27419	no hit					7202	MFS_1|Sugar_tr|Acetyltransf_3|DUF3445	EAA65371.1	1001	Glyco_transf_22|DUF3445	Aspergillus nidulans FGSC A4	GT22	NO	NO		Q5BFF1
comp9265_c0_seq13	-9.3943	no hit					5599	ICln_channel	AEO56549.1	756	Voldacs	Myceliophthora thermophila ATCC 42464	GT31	NO	NO
comp4954_c0_seq1	-9.42283	no hit					693	Glyco_hydro_7	CAJ75962.1	427	Glyco_hydro_7	Rasamsonia emersonii	GH7	YES	NO
comp2939_c0_seq1	-9.42283	no hit					1510	n/a	BAE66503.1	NA	n/a	Aspergillus oryzae RIB40	GT25	n/a	n/a		Q2TW70
comp9680_c0_seq59	-9.50517	no hit					7607	DUF3237	ADE82894.1	1609	Glyco_hydro_28|Glyco_hydro_88	Prevotella ruminicola 23	GH105|GH28	NO	NO		D5ET13
comp9265_c0_seq3	-9.63276	no hit					5668	ICln_channel	AEO56549.1	756	Voldacs	Myceliophthora thermophila ATCC 42464	GT31	NO	NO
comp7647_c0_seq5	-9.63276	no hit					3143	n/a	AEO59235.1	NA	n/a	Myceliophthora thermophila ATCC 42464	CBM48	n/a	n/a
comp9130_c0_seq17	-9.70422	no hit					3409	Response_reg|HSF_DNA-bind	NP_810096.1	1350	Glyco_tranf_2_3|HisKA|HATPase_c|Response_reg	Bacteroides thetaiotaomicron VPI-5482	GT2	NO	NO		Q8A8I4
comp8261_c0_seq2	-9.77232	no hit					2802	n/a	ACU74083.1	579	CBM_6	Catenulispora acidiphila DSM 44928	CBM6|GH64	n/a	NO		C7Q6P8
comp2245_c0_seq2	-9.81599	no hit					2794	Esterase_phd|Sugar_tr|MFS_1|Sugar_tr|MFS_1	CAE75726.1	305	Esterase_phd	Neurospora crassa OR74A	CE1	NO	NO	3.1.1.73	Q9HGR3Q9HGR3
comp9728_c0_seq20	-9.81599	no hit					3450	GMC_oxred_C	CBI59551.1	540	GMC_oxred_C	Sordaria macrospora k-hell	AA3	YES	NO
comp9680_c0_seq38	-10.1072	no hit					5814	DUF3237	ADE82894.1	1609	Glyco_hydro_28|Glyco_hydro_88	Prevotella ruminicola 23	GH105|GH28	NO	NO		D5ET13
comp9728_c0_seq9	-10.159	no hit					3573	GMC_oxred_C	CBI59551.1	540	GMC_oxred_C	Sordaria macrospora k-hell	AA3	YES	NO
comp8261_c0_seq4	-11.1583	no hit					3059	n/a	ACU74083.1	579	CBM_6	Catenulispora acidiphila DSM 44928	CBM6|GH64	n/a	NO		C7Q6P8
comp8348_c0_seq2	-11.1668	no hit					4833	Abhydrolase_5|Abhydrolase_6|Fungal_trans|Zn_clus	BAE64464.1	1388	Fungal_trans	Aspergillus oryzae RIB40	GH28	NO	NO		Q2U1V1
comp9680_c0_seq23	-11.1668	no hit					7612	DUF3237	ADE82894.1	1609	Glyco_hydro_28|Glyco_hydro_88	Prevotella ruminicola 23	GH105|GH28	NO	NO		D5ET13
comp9727_c0_seq15	-11.1919	no hit					7072	MFS_1|Sugar_tr|Acetyltransf_3|DUF3445	EAA65371.1	1001	Glyco_transf_22|DUF3445	Aspergillus nidulans FGSC A4	GT22	NO	NO		Q5BFF1
comp9680_c0_seq6	-11.3782	no hit					7595	DUF3237	ADE82894.1	1609	Glyco_hydro_28|Glyco_hydro_88	Prevotella ruminicola 23	GH105|GH28	NO	NO		D5ET13
comp9680_c0_seq53	-11.4903	no hit					5333	DUF3237	ADE82894.1	1609	Glyco_hydro_28|Glyco_hydro_88	Prevotella ruminicola 23	GH105|GH28	NO	NO		D5ET13
comp9130_c0_seq5	-11.6795	no hit					3606	Response_reg|HSF_DNA-bind	NP_810096.1	1350	Glyco_tranf_2_3|HisKA|HATPase_c|Response_reg	Bacteroides thetaiotaomicron VPI-5482	GT2	NO	NO		Q8A8I4
comp7727_c0_seq2	-13.575	no hit					4673	Dioxygenase_C|Fungal_trans|Zn_clus	BAG20890.1	300	Dioxygenase_C	Streptomyces griseus subsp. griseus NBRC 13350	CBM12	NO	NO		B1VSD6
comp9130_c0_seq12	-13.7791	no hit					3726	Response_reg|HSF_DNA-bind	NP_810096.1	1350	Glyco_tranf_2_3|HisKA|HATPase_c|Response_reg	Bacteroides thetaiotaomicron VPI-5482	GT2	NO	NO		Q8A8I4
comp8585_c0_seq3	11.2652	K01183		Amino sugar and nucleotide sugar metabolism	EC:3.2.1.14	chitinase	1919	Glyco_hydro_18|CBM_1	AEO66455.1	404	Glyco_hydro_18	Thielavia terrestris NRRL 8126	GH18|CBM1	NO	NO
comp8585_c0_seq2	10.5496	K01183		Amino sugar and nucleotide sugar metabolism	EC:3.2.1.14	chitinase	2084	Glyco_hydro_18|CBM_1	AEO66455.1	404	Glyco_hydro_18	Thielavia terrestris NRRL 8126	GH18|CBM1	NO	NO
comp8594_c0_seq5	9.7875	K01183		Amino sugar and nucleotide sugar metabolism	EC:3.2.1.14	chitinase	2119	Glyco_hydro_18	CAP59901.1	394	Glyco_hydro_18	Podospora anserina S mat+	GH18	YES	NO		B2A9Z0
comp2871_c0_seq1	8.06971	K01183		Amino sugar and nucleotide sugar metabolism	EC:3.2.1.14	chitinase	3949	Glyco_hydro_18|Glyco_hydro_18	CAK47333.1	1126	Glyco_hydro_18	Aspergillus niger CBS 513.88	CBM18|GH18	NO	NO		A2RBJ5
comp7875_c0_seq1	3.11859	K01183		Amino sugar and nucleotide sugar metabolism	EC:3.2.1.14	chitinase	2281	Glyco_hydro_18	AEO65134.1	920	Glyco_hydro_18	Thielavia terrestris NRRL 8126	CBM50|GH18	YES	NO
comp9945_c0_seq1	-4.73088	K02564		Amino sugar and nucleotide sugar metabolism	EC:3.5.99.6	glucosamine-6-phosphate deaminase	3362	Glucosamine_iso	CCG56996.1	667	Amidohydro_1	Brachyspira pilosicoli WesB	CE9	NO	NO
comp9945_c0_seq1	-4.73088	K02564		Amino sugar and nucleotide sugar metabolism	EC:3.5.99.6	glucosamine-6-phosphate deaminase	3362	Glucosamine_iso	AGA65840.1	667	Amidohydro_1	Brachyspira pilosicoli P43/6/78	CE9	NO	NO
comp9945_c0_seq1	-4.73088	K02564		Amino sugar and nucleotide sugar metabolism	EC:3.5.99.6	glucosamine-6-phosphate deaminase	3362	Glucosamine_iso	ADG70601.1	667	Amidohydro_1	Brachyspira murdochii DSM 12563	CE9	NO	NO		D5U6N5
comp9945_c0_seq1	-4.73088	K02564		Amino sugar and nucleotide sugar metabolism	EC:3.5.99.6	glucosamine-6-phosphate deaminase	3362	Glucosamine_iso	ADK30104.1	667	Amidohydro_1	Brachyspira pilosicoli 95/1000	CE9	NO	NO		D8I9Y7
comp4050_c0_seq1	-5.45561	K01183		Amino sugar and nucleotide sugar metabolism	EC:3.2.1.14	chitinase	4278	Glyco_hydro_18	ACR36531.1	430	Glyco_hydro_18	Zea mays B73	GH18	YES	NO		C4J5T1
comp4477_c0_seq1	-2.74751	K01876		Aminoacyl-tRNA biosynthesis	EC:6.1.1.12	aspartyl-tRNA synthetase	6379	tRNA-synt_2|Abhydrolase_3	NP_243672.1	335	Abhydrolase_3	Bacillus halodurans C-125	CE10	NO	NO		Q9K944
comp13200_c0_seq1	-3.50342	K00423		Ascorbate and aldarate metabolism	EC:1.10.3.3	L-ascorbate oxidase	2514	Cu-oxidase_2|Cu-oxidase|Cu-oxidase_3	CAP98129.1	620	Cu-oxidase_3|Cu-oxidase|Cu-oxidase_2	Penicillium chrysogenum Wisconsin 54-1255	AA1	NO	NO		B6HSA6
comp8381_c0_seq1	9.72091	K00059		Biotin metabolism	EC:1.1.1.100	3-oxoacyl-[acyl-carrier protein] reductase	2450	adh_short|adh_short_C2	EAA62552.1	1087	Glyco_hydro_92|adh_short_C2	Aspergillus nidulans FGSC A4	GH92	NO	NO		Q5B238
comp5879_c0_seq2	9.40669	K00059		Biotin metabolism	EC:1.1.1.100	3-oxoacyl-[acyl-carrier protein] reductase	1241	adh_short_C2|adh_short	EAA62552.1	1087	Glyco_hydro_92|adh_short_C2	Aspergillus nidulans FGSC A4	GH92	NO	YES		Q5B238
comp8926_c0_seq6	5.93841	K00059		Biotin metabolism	EC:1.1.1.100	3-oxoacyl-[acyl-carrier protein] reductase	2001	adh_short|adh_short_C2	EAA62552.1	1087	Glyco_hydro_92|adh_short_C2	Aspergillus nidulans FGSC A4	GH92	NO	NO		Q5B238
comp5879_c0_seq1	4.93853	K00059		Biotin metabolism	EC:1.1.1.100	3-oxoacyl-[acyl-carrier protein] reductase	703	adh_short_C2	EAA62552.1	1087	Glyco_hydro_92|adh_short_C2	Aspergillus nidulans FGSC A4	GH92	NO	NO		Q5B238
comp3051_c0_seq1	4.56243	K00059		Biotin metabolism	EC:1.1.1.100	3-oxoacyl-[acyl-carrier protein] reductase	1111	adh_short_C2|KR|adh_short	EAA62552.1	1087	Glyco_hydro_92|adh_short_C2	Aspergillus nidulans FGSC A4	GH92	NO	YES		Q5B238
comp5879_c0_seq3	4.45809	K00059		Biotin metabolism	EC:1.1.1.100	3-oxoacyl-[acyl-carrier protein] reductase	1091	adh_short_C2|adh_short	EAA62552.1	1087	Glyco_hydro_92|adh_short_C2	Aspergillus nidulans FGSC A4	GH92	NO	YES		Q5B238
comp7177_c0_seq2	2.96459	K00059		Biotin metabolism	EC:1.1.1.100	3-oxoacyl-[acyl-carrier protein] reductase	2853	adh_short|adh_short_C2	EAA62552.1	1087	Glyco_hydro_92|adh_short_C2	Aspergillus nidulans FGSC A4	GH92	NO	NO		Q5B238
comp10833_c0_seq1	-3.04212	K00059		Biotin metabolism	EC:1.1.1.100	3-oxoacyl-[acyl-carrier protein] reductase	1331	adh_short_C2|adh_short	EAA62552.1	1087	Glyco_hydro_92|adh_short_C2	Aspergillus nidulans FGSC A4	GH92	NO	YES		Q5B238
comp10431_c0_seq1	-4.82902	K00059		Biotin metabolism	EC:1.1.1.100	3-oxoacyl-[acyl-carrier protein] reductase	2743	adh_short_C2|adh_short	EAA62552.1	1087	Glyco_hydro_92|adh_short_C2	Aspergillus nidulans FGSC A4	GH92	NO	NO		Q5B238
comp5186_c0_seq1	3.85274	K01066		Bisphenol degradation	EC:3.1.1.-	esterase / lipase	3994	Abhydrolase_3	NP_594994.1	355	Abhydrolase_3	Schizosaccharomyces pombe 972h-	CE10	YES	NO		Q9US38
comp11011_c0_seq1	2.79178	K01066		Bisphenol degradation	EC:3.1.1.-	esterase / lipase	2722	Abhydrolase_3	AAG09918.1	290	Abhydrolase_3	Bacillus pumilus	CE10	YES	NO	3.1.1.-	Q9F6C1
comp10118_c0_seq1	6.97633	K00004		Butanoate metabolism	EC:1.1.1.4 1.1.1.- 1.1.1.303	(R,R)-butanediol dehydrogenase / meso-butanediol dehydrogenase / diacetyl reductase	1544	ADH_zinc_N|ADH_N	EAA63396.1	764	Glyco_hydro_76|ADH_N|ADH_zinc_N	Aspergillus nidulans FGSC A4	GH76	NO	NO		Q5B9F5
comp9288_c0_seq2	9.24005	K00002		Caprolactam degradation	EC:1.1.1.2	alcohol dehydrogenase (NADP+)	2601	ADH_zinc_N|ADH_N	EAA63396.1	764	Glyco_hydro_76|ADH_N|ADH_zinc_N	Aspergillus nidulans FGSC A4	GH76	NO	NO		Q5B9F5
comp6755_c0_seq2	-5.43209	K01176		Carbohydrate digestion and absorption	EC:3.2.1.1	alpha-amylase	1790	Alpha-amylase	ACX68263.1	502	Alpha-amylase	Paenibacillus sp. Y412MC10	GH13	YES	NO		D3EGB3
comp9259_c0_seq2	11.4021	K06653		Cell cycle - yeast		CDK inhibitor PHO81	4505	SPX|Ank_2|Ank_2|Ank_2	AAI68443.1	688	GDPD	Xenopus (Silurana) tropicalis N6 (Nigerian 6th generation inbred)	CBM20	NO	NO		B5DDX4
comp9259_c0_seq4	8.42085	K06653		Cell cycle - yeast		CDK inhibitor PHO81	4894	SPX|Ank_2|Ank_2|Ank_2	AAI68443.1	688	GDPD	Xenopus (Silurana) tropicalis N6 (Nigerian 6th generation inbred)	CBM20	NO	NO		B5DDX4
comp4600_c0_seq2	13.3647	K01336		Cerevisin - Chaperone and intramolecular catalysts			1780	Peptidase_S8	AEB45483.1	908	Peptidase_S8|CBM_2	Verrucosispora maris AB-18-032	CBM2	NO	NO
comp9045_c0_seq10	-3.21415	K04441		Chagas disease (American trypanosomiasis)	EC:2.7.11.24	p38 MAP kinase	7437	Pkinase|Pkinase_Tyr	CBX99002.1	785	Pkinase	Leptosphaeria maculans v23.1.3	GH18	NO	NO		E5A5V7
comp9045_c0_seq12	-4.62504	K04441		Chagas disease (American trypanosomiasis)	EC:2.7.11.24	p38 MAP kinase	7653	Pkinase|Pkinase_Tyr	CBX99002.1	785	Pkinase	Leptosphaeria maculans v23.1.3	GH18	NO	NO		E5A5V7
comp9045_c0_seq5	-5.81636	K04441		Chagas disease (American trypanosomiasis)	EC:2.7.11.24	p38 MAP kinase	7719	Pkinase|Pkinase_Tyr	CBX99002.1	785	Pkinase	Leptosphaeria maculans v23.1.3	GH18	NO	NO		E5A5V7
comp9485_c0_seq1	8.66305	K00128		Chloroalkane and chloroalkene degradation	EC:1.2.1.3	aldehyde dehydrogenase (NAD+)	5641	WBS_methylT|Aldedh|GMC_oxred_C|GMC_oxred_N	ADB41615.1	572	GMC_oxred_N|GMC_oxred_C	Spirosoma linguale DSM 74	AA3	NO	NO		D2QS33
comp6058_c0_seq1	3.68122	K00128		Chloroalkane and chloroalkene degradation	EC:1.2.1.3	aldehyde dehydrogenase (NAD+)	5630	Glyco_hydro_3|Aminotran_5|Aldedh	AEO58343.1	746	Glyco_hydro_3|Glyco_hydro_3_C|Fn3-like	Myceliophthora thermophila ATCC 42464	GH3	NO	NO	3.2.1.21
comp11618_c0_seq1	8.12924	K00008		Fructose and mannose metabolism	EC:1.1.1.14	L-iditol 2-dehydrogenase	1461	ADH_N	EAA63396.1	764	Glyco_hydro_76|ADH_N|ADH_zinc_N	Aspergillus nidulans FGSC A4	GH76	NO	NO		Q5B9F5
comp10461_c0_seq1	3.28563	K00008		Fructose and mannose metabolism	EC:1.1.1.14	L-iditol 2-dehydrogenase	1785	ADH_N|ADH_zinc_N	EAA63396.1	764	Glyco_hydro_76|ADH_N|ADH_zinc_N	Aspergillus nidulans FGSC A4	GH76	NO	NO		Q5B9F5
comp9489_c0_seq1	9.6201	K00434		Glutathione metabolism	EC:1.11.1.11	L-ascorbate peroxidase	3543	peroxidase|DUF1295	CCF45286.1	436	peroxidase	Colletotrichum higginsianum IMI 349063	AA2	NO	NO
comp4708_c0_seq2	-8.27652	K00434		Glutathione metabolism	EC:1.11.1.11	L-ascorbate peroxidase	1708	peroxidase	CCF45286.1	436	peroxidase	Colletotrichum higginsianum IMI 349063	AA2	YES	NO
comp4157_c0_seq1	7.23984	K06116		Glycerolipid metabolism	EC:3.1.3.21	glycerol 3-phosphatase 1	1728	HAD_2	AGG87862.1	1028	Glyco_hydro_65N|Glyco_hydro_65m|HAD_2	Rhodanobacter sp. 2APBS1	GH65	NO	NO
comp2564_c0_seq2	12.4569	K01126		Glycerophospholipid metabolism	EC:3.1.4.46	glycerophosphoryl diester phosphodiesterase	7475	PIG-F|GDPD|Fungal_trans|Zn_clus	BAN02470.1	587	GDPD|CBM_2	Acidimicrobidae bacterium YM16-304	CBM2	NO	NO
comp7458_c0_seq1	11.1324	K00108		Glycine, serine and threonine metabolism	EC:1.1.99.1	choline dehydrogenase	4549	GMC_oxred_N|GMC_oxred_C	CAK44482.1	637	GMC_oxred_N|GMC_oxred_C	Aspergillus niger CBS 513.88	AA3	YES	NO		A2QEM1
comp9336_c0_seq13	9.85116	K00108		Glycine, serine and threonine metabolism	EC:1.1.99.1	choline dehydrogenase	3374	GMC_oxred_C	CCA74023.1	627	GMC_oxred_N|GMC_oxred_C	Piriformospora indica	AA3	NO	NO
comp8285_c0_seq8	9.57772	K00108		Glycine, serine and threonine metabolism	EC:1.1.99.1	choline dehydrogenase	3737	GMC_oxred_C|GMC_oxred_N|GMC_oxred_N	CBX90875.1	623	GMC_oxred_N|GMC_oxred_C	Leptosphaeria maculans JN3	AA3	NO	NO
comp8285_c0_seq7	9.28025	K00108		Glycine, serine and threonine metabolism	EC:1.1.99.1	choline dehydrogenase	3655	GMC_oxred_C|GMC_oxred_N|GMC_oxred_N	CBX90875.1	623	GMC_oxred_N|GMC_oxred_C	Leptosphaeria maculans JN3	AA3	NO	NO
comp9336_c0_seq5	8.37209	K00108		Glycine, serine and threonine metabolism	EC:1.1.99.1	choline dehydrogenase	3308	GMC_oxred_C	CCA74023.1	627	GMC_oxred_N|GMC_oxred_C	Piriformospora indica	AA3	NO	NO
comp6098_c0_seq2	4.35001	K00108		Glycine, serine and threonine metabolism	EC:1.1.99.1	choline dehydrogenase	3053	GMC_oxred_N|GMC_oxred_C	AAS90088.1	656	GMC_oxred_N|GMC_oxred_C	Aspergillus flavus	AA3	YES	NO
comp6098_c0_seq2	4.35001	K00108		Glycine, serine and threonine metabolism	EC:1.1.99.1	choline dehydrogenase	3053	GMC_oxred_N|GMC_oxred_C	BAE59528.1	656	GMC_oxred_N|GMC_oxred_C	Aspergillus oryzae RIB40	AA3	YES	NO
comp6596_c0_seq1	3.34104	K00108		Glycine, serine and threonine metabolism	EC:1.1.99.1	choline dehydrogenase	3133	GMC_oxred_N|GMC_oxred_C	CCF31824.1	804	GMC_oxred_N|GMC_oxred_C	Colletotrichum higginsianum IMI 349063	AA3|AA8	YES	NO
comp5835_c0_seq1	-3.47642	K00108		Glycine, serine and threonine metabolism	EC:1.1.99.1	choline dehydrogenase	2009	GMC_oxred_N|GMC_oxred_C	XP_500864.1	623	GMC_oxred_N|GMC_oxred_C	Yarrowia lipolytica CLIB122 CLIB99	AA3	YES	NO
comp9336_c0_seq3	-8.27652	K00108		Glycine, serine and threonine metabolism	EC:1.1.99.1	choline dehydrogenase	3424	GMC_oxred_C	CCA74023.1	627	GMC_oxred_N|GMC_oxred_C	Piriformospora indica	AA3	NO	NO
comp6308_c0_seq4	13.7737	K01175		Hydrolase			1641	Abhydrolase_3	NP_631192.1	330	Abhydrolase_3	Streptomyces coelicolor A3(2)	CE10	YES	NO		Q9FC55
comp10100_c0_seq1	5.21849	K01714		Lysine biosynthesis	EC:4.3.3.7	4-hydroxy-tetrahydrodipicolinate synthase	2109	DHDPS	CCD02617.1	737	DHDPS|BNR_2	Azospirillum brasilense Sp245	GH33	NO	NO
comp3738_c0_seq1	3.16019	K00143		Lysine degradation	EC:1.2.1.31	L-aminoadipate-semialdehyde dehydrogenase	4266	NAD_binding_4|Epimerase|PP-binding|AMP-binding	AFY93865.1	2649	Glycos_transf_2|AMP-binding|AMP-binding_C|ketoacyl-synt|Ketoacyl-synt_C|Acyl_transf_1|Aminotran_3	Chamaesiphon minutus PCC 6605	GT2	NO	NO
comp8677_c0_seq1	-3.4895	K01201		Lysosome	EC:3.2.1.45	glucosylceramidase	3401	Glyco_hydro_30	AEO71227.1	NA	n/a	Thielavia terrestris NRRL 8126	GH30	n/a	n/a
comp2794_c0_seq1	-4.75203	K01279		Lysosome	EC:3.4.14.9	tripeptidyl-peptidase I	1990	n/a	XP_003720306.1	NA	n/a	Magnaporthe grisea 70-15	GH131	n/a	n/a
comp8338_c0_seq3	10.8768	K02212		Meiosis - yeast	EC:3.6.4.12	DNA replication licensing factor MCM4	7055	MCM|Glyco_hydro_2_N|Glyco_hydro_2_C	CAK44902.1	661	Glyco_hydro_2_N	Aspergillus niger CBS 513.88	GH2	NO	NO		A2QL36
comp12814_c0_seq1	2.88788	K08139		Meiosis - yeast		MFS transporter, SP family, sugar:H+ symporter	1925	MFS_1|Sugar_tr|MFS_1	CCA21934.1	2288	FKS1_dom1|Glucan_synthase|Sugar_tr	Albugo laibachii Nc14	GT48	NO	YES
comp3454_c0_seq1	-2.76416	K08139		Meiosis - yeast		MFS transporter, SP family, sugar:H+ symporter	2531	MFS_1|Sugar_tr	CCA17033.1	2250	FKS1_dom1|Glucan_synthase|Sugar_tr	Albugo laibachii Nc14	GT48	NO	YES
comp9622_c0_seq20	11.5897	K02100		MFS transporter, SP family, arabinose:H+ symporter		araE;	10807	adh_short|adh_short_C2|MFS_1|Sugar_tr|MFS_1|MFS_1|MFS_2|Peptidase_M28|p450	EAA66095.1	845	p450	Aspergillus nidulans FGSC A4	GT34	NO	NO		Q5BGV8
comp9622_c0_seq21	11.4989	K02100		MFS transporter, SP family, arabinose:H+ symporter		araE;	10869	adh_short|adh_short_C2|MFS_1|Sugar_tr|MFS_1|MFS_1|MFS_2|Peptidase_M28|p450	EAA66095.1	845	p450	Aspergillus nidulans FGSC A4	GT34	NO	NO		Q5BGV8
comp8352_c0_seq3	9.14166	K07436		MicroRNAs in cancer	EC:1.14.13.126	vitamin D3 24-hydroxylase	3039	p450	EAA66095.1	845	p450	Aspergillus nidulans FGSC A4	GT34	YES	NO		Q5BGV8
comp7481_c0_seq3	-3.24793	K03657		Mismatch repair	EC:3.6.4.12	DNA helicase II / ATP-dependent DNA helicase PcrA	5626	UvrD_C_2|UvrD_C|AAA_19|UvrD-helicase	XP_368624.1	NA	n/a	Magnaporthe grisea 70-15	CE9	n/a	n/a		G4NB58
comp7481_c0_seq3	-3.24793	K03657		Mismatch repair	EC:3.6.4.12	DNA helicase II / ATP-dependent DNA helicase PcrA	5626	UvrD_C_2|UvrD_C|AAA_19|UvrD-helicase	ADD84625.1	NA	n/a	Magnaporthe oryzae	CE9	n/a	n/a		D4NXH3
comp7481_c0_seq2	-8.27652	K03657		Mismatch repair	EC:3.6.4.12	DNA helicase II / ATP-dependent DNA helicase PcrA	3708	UvrD_C_2|UvrD_C|AAA_19|UvrD-helicase	AEO58969.1	NA	n/a	Myceliophthora thermophila ATCC 42464	CE9	n/a	n/a
comp8979_c0_seq22	10.3688	K00737		N-Glycan biosynthesis	EC:2.4.1.144	beta-1,4-mannosyl-glycoprotein beta-1,4-N-acetylglucosaminyltransferase	2937	Glyco_transf_17	AEO66100.1	371	Glyco_transf_17	Thielavia terrestris NRRL 8126	GT17	YES	NO
comp8979_c0_seq19	10.111	K00737		N-Glycan biosynthesis	EC:2.4.1.144	beta-1,4-mannosyl-glycoprotein beta-1,4-N-acetylglucosaminyltransferase	2738	Glyco_transf_17	AEO66100.1	371	Glyco_transf_17	Thielavia terrestris NRRL 8126	GT17	YES	NO
comp8979_c0_seq11	8.15866	K00737		N-Glycan biosynthesis	EC:2.4.1.144	beta-1,4-mannosyl-glycoprotein beta-1,4-N-acetylglucosaminyltransferase	2906	Glyco_transf_17	AEO66100.1	371	Glyco_transf_17	Thielavia terrestris NRRL 8126	GT17	YES	NO
comp8979_c0_seq2	-8.14572	K00737		N-Glycan biosynthesis	EC:2.4.1.144	beta-1,4-mannosyl-glycoprotein beta-1,4-N-acetylglucosaminyltransferase	2838	Glyco_transf_17	AEO66100.1	371	Glyco_transf_17	Thielavia terrestris NRRL 8126	GT17	YES	NO
comp8979_c0_seq7	-9.07291	K00737		N-Glycan biosynthesis	EC:2.4.1.144	beta-1,4-mannosyl-glycoprotein beta-1,4-N-acetylglucosaminyltransferase	2981	Glyco_transf_17	AEO66100.1	371	Glyco_transf_17	Thielavia terrestris NRRL 8126	GT17	YES	NO
comp6161_c0_seq1	3.00059	K00602		One carbon pool by folate	EC:2.1.2.3 3.5.4.10	phosphoribosylaminoimidazolecarboxamide formyltransferase / IMP cyclohydrolase	6645	MGS|AICARFT_IMPCHas|AAA_27|Myosin_tail_1|Filament|Myosin_tail_1|AAA_27|MAD|Rab5-bind|MAD|DUF3584|Cast|Cast|HOOK|Myosin_tail_1|Cast	CCO17752.1	NA	n/a	Bathycoccus prasinos RCC 1105	CBM50|CBM20	n/a	n/a
comp9654_c0_seq3	9.90357	K01190		Other glycan degradation	EC:3.2.1.23	beta-galactosidase	8565	Glyco_hydro_2_N|Glyco_hydro_2|Glyco_hydro_2_C	AEO59435.1	894	Glyco_hydro_2_N|Glyco_hydro_2|Glyco_hydro_2_C	Myceliophthora thermophila ATCC 42464	GH2	YES	NO
comp9654_c0_seq5	9.82422	K01190		Other glycan degradation	EC:3.2.1.23	beta-galactosidase	8280	Glyco_hydro_2_N|Glyco_hydro_2|Glyco_hydro_2_C	AEO59435.1	894	Glyco_hydro_2_N|Glyco_hydro_2|Glyco_hydro_2_C	Myceliophthora thermophila ATCC 42464	GH2	YES	NO
comp9579_c0_seq12	10.5331	K05349		Phenylpropanoid biosynthesis	EC:3.2.1.21	beta-glucosidase	5513	Peptidase_C2|Glyco_hydro_3	XP_365193.1	635	Glyco_hydro_3	Magnaporthe grisea 70-15	GH3	NO	NO		G4N9A6
comp9579_c0_seq2	10.5275	K05349		Phenylpropanoid biosynthesis	EC:3.2.1.21	beta-glucosidase	5437	Peptidase_C2|Glyco_hydro_3	XP_365193.1	635	Glyco_hydro_3	Magnaporthe grisea 70-15	GH3	NO	NO		G4N9A6
comp9579_c0_seq3	10.4237	K05349		Phenylpropanoid biosynthesis	EC:3.2.1.21	beta-glucosidase	5372	Peptidase_C2|Glyco_hydro_3	XP_365193.1	635	Glyco_hydro_3	Magnaporthe grisea 70-15	GH3	NO	NO		G4N9A6
comp9579_c0_seq10	10.1763	K05349		Phenylpropanoid biosynthesis	EC:3.2.1.21	beta-glucosidase	5378	Peptidase_C2|Glyco_hydro_3	XP_365193.1	635	Glyco_hydro_3	Magnaporthe grisea 70-15	GH3	NO	NO		G4N9A6
comp9579_c0_seq7	10.0657	K05349		Phenylpropanoid biosynthesis	EC:3.2.1.21	beta-glucosidase	5313	Peptidase_C2|Glyco_hydro_3	XP_365193.1	635	Glyco_hydro_3	Magnaporthe grisea 70-15	GH3	NO	NO		G4N9A6
comp9241_c0_seq2	9.74983	K01904		Phenylpropanoid biosynthesis	EC:6.2.1.12	4-coumarate--CoA ligase	2857	EthD|AMP-binding	AFY93865.1	2649	Glycos_transf_2|AMP-binding|AMP-binding_C|ketoacyl-synt|Ketoacyl-synt_C|Acyl_transf_1|Aminotran_3	Chamaesiphon minutus PCC 6605	GT2	NO	YES
comp6679_c0_seq1	8.97205	K03782		Phenylpropanoid biosynthesis	EC:1.11.1.21	catalase-peroxidase	1306	n/a	AFO84287.1	444	peroxidase	Prorocentrum minimum D-127	AA2	n/a	NO
comp9579_c0_seq1	8.42085	K05349		Phenylpropanoid biosynthesis	EC:3.2.1.21	beta-glucosidase	5514	Peptidase_C2|Glyco_hydro_3	XP_365193.1	635	Glyco_hydro_3	Magnaporthe grisea 70-15	GH3	NO	NO		G4N9A6
comp11371_c0_seq1	4.86089	K05349		Phenylpropanoid biosynthesis	EC:3.2.1.21	beta-glucosidase	2817	Glyco_hydro_3|Glyco_hydro_3_C|Fn3-like	CAP73666.1	783	Glyco_hydro_3|Glyco_hydro_3_C|Fn3-like	Podospora anserina S mat+	GH3	YES	NO		B2B788
comp6058_c1_seq1	2.78246	K05349		Phenylpropanoid biosynthesis	EC:3.2.1.21	beta-glucosidase	3525	Fn3-like|Glyco_hydro_3_C|Glyco_hydro_3	BAE64040.1	828	Glyco_hydro_3|Glyco_hydro_3_C|Fn3-like	Aspergillus oryzae RIB40	GH3	NO	NO		Q2U325
comp6679_c0_seq3	-8.39644	K03782		Phenylpropanoid biosynthesis	EC:1.11.1.21	catalase-peroxidase	1146	n/a	AFO84287.1	444	peroxidase	Prorocentrum minimum D-127	AA2	n/a	NO
comp8453_c0_seq1	-9.77232	K05349		Phenylpropanoid biosynthesis	EC:3.2.1.21	beta-glucosidase	9098	Fn3-like|Glyco_hydro_3_C|Glyco_hydro_3	CCD56845.1	790	Glyco_hydro_3|Glyco_hydro_3_C|Fn3-like	Botryotinia fuckeliana	GH3	NO	NO
comp8453_c0_seq5	-11.2001	K05349		Phenylpropanoid biosynthesis	EC:3.2.1.21	beta-glucosidase	9042	Fn3-like|Glyco_hydro_3_C|Glyco_hydro_3	CCD56845.1	790	Glyco_hydro_3|Glyco_hydro_3_C|Fn3-like	Botryotinia fuckeliana	GH3	NO	NO
comp9728_c0_seq15	10.5051	K00119		Phosphonate and phosphinate metabolism	EC:1.1.99.-		6931	GMC_oxred_C|GMC_oxred_N	CBI59551.1	540	GMC_oxred_C	Sordaria macrospora k-hell	AA3	NO	NO
comp11213_c0_seq1	-2.88278	K00119		Phosphonate and phosphinate metabolism	EC:1.1.99.-		1862	GMC_oxred_N|GMC_oxred_C	CCF31824.1	804	GMC_oxred_N|GMC_oxred_C	Colletotrichum higginsianum IMI 349063	AA3|AA8	YES	NO
comp9504_c0_seq1	9.30644	K00517		Polycyclic aromatic hydrocarbon degradation	EC:1.14.-.-		3258	p450	EAA66095.1	845	p450	Aspergillus nidulans FGSC A4	GT34	YES	NO		Q5BGV8
comp8966_c0_seq6	5.84946	K00517		Polycyclic aromatic hydrocarbon degradation	EC:1.14.-.-		3338	p450|zf-UBR	EAA66095.1	845	p450	Aspergillus nidulans FGSC A4	GT34	NO	NO		Q5BGV8
comp8879_c0_seq8	4.25593	K00517		Polycyclic aromatic hydrocarbon degradation	EC:1.14.-.-		2019	p450	EAA66095.1	845	p450	Aspergillus nidulans FGSC A4	GT34	YES	NO		Q5BGV8
comp17861_c0_seq1	4.17427	K00517		Polycyclic aromatic hydrocarbon degradation	EC:1.14.-.-		1930	Pyr_redox_3|K_oxygenase	NP_051574.1	847	Abhydrolase_3|Pyr_redox_3	Deinococcus radiodurans R1	CE10	NO	NO		Q9RZT0
comp5437_c0_seq1	3.23452	K00517		Polycyclic aromatic hydrocarbon degradation	EC:1.14.-.-		4232	p450	EAA66095.1	845	p450	Aspergillus nidulans FGSC A4	GT34	YES	NO		Q5BGV8
comp3748_c0_seq1	-3.56836	K00517		Polycyclic aromatic hydrocarbon degradation	EC:1.14.-.-		805	p450	EAA66095.1	845	p450	Aspergillus nidulans FGSC A4	GT34	YES	YES		Q5BGV8
comp11213_c0_seq1	-8.2126	K00517		Polycyclic aromatic hydrocarbon degradation	EC:1.14.-.-		1862	GMC_oxred_N|GMC_oxred_C	CCF31824.1	804	GMC_oxred_N|GMC_oxred_C	Colletotrichum higginsianum IMI 349063	AA3|AA8	YES	NO
comp11417_c0_seq1	4.27483	K01845		Porphyrin and chlorophyll metabolism	EC:5.4.3.8	glutamate-1-semialdehyde 2,1-aminomutase	1529	Aminotran_3	AFY93865.1	2649	Glycos_transf_2|AMP-binding|AMP-binding_C|ketoacyl-synt|Ketoacyl-synt_C|Acyl_transf_1|Aminotran_3	Chamaesiphon minutus PCC 6605	GT2	NO	NO
comp4447_c0_seq1	9.53406	K08745		PPAR signaling pathway	EC:6.2.1.-	solute carrier family 27 (fatty acid transporter), member 1/4	2663	AMP-binding	ACX49739.1	2318	Condensation|AMP-binding|AMP-binding_C|Condensation|HxxPF_rpt|AMP-binding|Glyco_hydro_4|Glyco_hydro_4C	uncultured marine bacterium 1n22	GH4	NO	YES		D2DIQ1
comp4447_c0_seq2	-3.10194	K08745		PPAR signaling pathway	EC:6.2.1.-	solute carrier family 27 (fatty acid transporter), member 1/4	2732	AMP-binding	ACX49739.1	2318	Condensation|AMP-binding|AMP-binding_C|Condensation|HxxPF_rpt|AMP-binding|Glyco_hydro_4|Glyco_hydro_4C	uncultured marine bacterium 1n22	GH4	NO	YES		D2DIQ1
comp6776_c0_seq4	9.05162	K01230		Protein processing in endoplasmic reticulum	EC:3.2.1.113	mannosyl-oligosaccharide alpha-1,2-mannosidase	3475	Glyco_hydro_47|ADH_zinc_N|ADH_N	AEO62211.1	618	Glyco_hydro_47	Thielavia terrestris NRRL 8126	GH47	NO	NO
comp3969_c0_seq1	-4.38586	K01230		Protein processing in endoplasmic reticulum	EC:3.2.1.113	mannosyl-oligosaccharide alpha-1,2-mannosidase	8040	Glyco_hydro_47|Ank_2|Ank_2|Ank_2|Ank_2|Ank_2|Ank_2|Ank_2|Ank_2	CAY09757.1	558	Glyco_hydro_47	Fusarium graminearum PH-1	GH47	NO	NO
comp3969_c0_seq1	-4.38586	K01230		Protein processing in endoplasmic reticulum	EC:3.2.1.113	mannosyl-oligosaccharide alpha-1,2-mannosidase	8040	Glyco_hydro_47|Ank_2|Ank_2|Ank_2|Ank_2|Ank_2|Ank_2|Ank_2|Ank_2	CAY05997.1	558	Glyco_hydro_47	Fusarium graminearum PH-1	GH47	NO	NO
comp8729_c0_seq8	-4.43851	K09503		Protein processing in endoplasmic reticulum		DnaJ homolog subfamily A member 2	5222	DnaJ|DnaJ_CXXCXGXG|DnaJ_C	ACI49189.1	1267	Alpha-amylase_C|DnaJ	Caenorhabditis sp. PS1010	CBM48	NO	NO		B6VBU6
comp8547_c0_seq3	-10.3493	K01228		Protein processing in endoplasmic reticulum	EC:3.2.1.106	mannosyl-oligosaccharide glucosidase	4332	Glyco_hydro_63|p450	AEO69881.1	877	Glyco_hydro_63	Thielavia terrestris NRRL 8126	GH63	NO	NO
comp7529_c0_seq2	-3.77208	K00102		Pyruvate metabolism	EC:1.1.2.4	D-lactate dehydrogenase (cytochrome)	3543	FAD-oxidase_C|FAD_binding_4	AFT66533.1	535	FAD_binding_4|FAD-oxidase_C	Cycloclasticus sp. P1 P1; MCCC 1A01040	AA4	NO	NO
comp3216_c0_seq2	-4.23081	K00102		Pyruvate metabolism	EC:1.1.2.4	D-lactate dehydrogenase (cytochrome)	5244	FAD-oxidase_C|FAD_binding_4	AGL20666.1	529	FAD_binding_4|FAD-oxidase_C	Actinoplanes sp. N902-109	AA4	NO	NO
comp8634_c0_seq4	2.82448	K02977		Ribosome		small subunit ribosomal protein S27Ae	1658	Ribosomal_S27|ubiquitin|Rad60-SLD|Ribosomal_S26e	NP_258300.1	365	ubiquitin|Chitin_bind_3	Spodoptera litura NPV G2	AA10	NO	NO		Q91BI7
comp7860_c0_seq2	10.796	K08596		sentrin-specific protease 7			7315	Peptidase_C48|Bac_rhamnosid	CAP72888.1	NA	n/a	Podospora anserina S mat+	GH78	n/a	n/a		B2B513
comp9565_c0_seq1	10.9241	K01184		Starch and sucrose metabolism	EC:3.2.1.15	polygalacturonase	5783	DUF3533|Glyco_hydro_28	AEO70983.1	376	Glyco_hydro_28	Thielavia terrestris NRRL 8126	GH28	NO	NO
comp9700_c0_seq4	8.9556	K01210		Starch and sucrose metabolism	EC:3.2.1.58	glucan 1,3-beta-glucosidase	3855	Cellulase	ABK27195.1	442	Cellulase	Epichloe festucae FL1	GH5	YES	NO	3.2.1.75	A0FJV0
comp9700_c0_seq5	8.60093	K01210		Starch and sucrose metabolism	EC:3.2.1.58	glucan 1,3-beta-glucosidase	3963	Cellulase	ABK27195.1	442	Cellulase	Epichloe festucae FL1	GH5	YES	NO	3.2.1.75	A0FJV0
comp7311_c0_seq2	4.13125	K01187		Starch and sucrose metabolism	EC:3.2.1.20	alpha-glucosidase	2391	Alpha-amylase	CCG44821.1	578	Alpha-amylase	Halobacillus halophilus DSM 2266 type strain: DSM 2266	GH13	YES	NO
comp12990_c0_seq1	2.86364	K01210		Starch and sucrose metabolism	EC:3.2.1.58	glucan 1,3-beta-glucosidase	2264	Cellulase	CAP94484.1	430	Cellulase	Penicillium chrysogenum Wisconsin 54-1255	GH5	YES	NO		B6HCY2
comp9904_c0_seq1	-2.94807	K01210		Starch and sucrose metabolism	EC:3.2.1.58	glucan 1,3-beta-glucosidase	3456	n/a	EAL86311.1	NA	n/a	Aspergillus fumigatus Af293	GH17	n/a	n/a
comp11205_c0_seq1	-3.41937	K01210		Starch and sucrose metabolism	EC:3.2.1.58	glucan 1,3-beta-glucosidase	1217	n/a	EAL86311.1	NA	n/a	Aspergillus fumigatus Af293	GH17	n/a	n/a
comp6613_c0_seq1	-3.5077	K00559		Steroid biosynthesis	EC:2.1.1.41	sterol 24-C-methyltransferase	1654	Sterol_MT_C|Methyltransf_12|Methyltransf_25|Methyltransf_26|Methyltransf_18|Methyltransf_31|CMAS|Methyltransf_23	ADG75248.1	647	Glycos_transf_1|Methyltransf_11	Cellulomonas flavigena DSM 20109	GT4	NO	NO		D5UHC7
comp6980_c0_seq1	9.53406	K00067		Streptomycin biosynthesis	EC:1.1.1.133	dTDP-4-dehydrorhamnose reductase	2299	NAD_binding_4|Epimerase	AEG91581.1	772	RmlD_sub_bind	Ramlibacter tataouinensis TTB310	GH1	NO	NO
comp9705_c1_seq30	10.2923	K07677		Two-component system	EC:2.7.13.3	two-component system, NarL family, capsular synthesis sensor histidine kinase RcsC	9496	Response_reg|HATPase_c|HisKA	NP_810096.1	1350	Glyco_tranf_2_3|HisKA|HATPase_c|Response_reg	Bacteroides thetaiotaomicron VPI-5482	GT2	NO	NO		Q8A8I4
comp9705_c1_seq23	10.2389	K07677		Two-component system	EC:2.7.13.3	two-component system, NarL family, capsular synthesis sensor histidine kinase RcsC	9853	Response_reg|HATPase_c|HisKA	NP_810096.1	1350	Glyco_tranf_2_3|HisKA|HATPase_c|Response_reg	Bacteroides thetaiotaomicron VPI-5482	GT2	NO	NO		Q8A8I4
comp9705_c1_seq5	8.536	K07677		Two-component system	EC:2.7.13.3	two-component system, NarL family, capsular synthesis sensor histidine kinase RcsC	9735	Response_reg|HATPase_c|HisKA	NP_810096.1	1350	Glyco_tranf_2_3|HisKA|HATPase_c|Response_reg	Bacteroides thetaiotaomicron VPI-5482	GT2	NO	NO		Q8A8I4
comp9705_c1_seq32	8.09997	K07677		Two-component system	EC:2.7.13.3	two-component system, NarL family, capsular synthesis sensor histidine kinase RcsC	9745	Response_reg|HATPase_c|HisKA	NP_810096.1	1350	Glyco_tranf_2_3|HisKA|HATPase_c|Response_reg	Bacteroides thetaiotaomicron VPI-5482	GT2	NO	NO		Q8A8I4
comp9705_c1_seq19	8.06971	K07677		Two-component system	EC:2.7.13.3	two-component system, NarL family, capsular synthesis sensor histidine kinase RcsC	9647	Response_reg|HATPase_c|HisKA	NP_810096.1	1350	Glyco_tranf_2_3|HisKA|HATPase_c|Response_reg	Bacteroides thetaiotaomicron VPI-5482	GT2	NO	NO		Q8A8I4
comp9705_c1_seq1	-3.80087	K07677		Two-component system	EC:2.7.13.3	two-component system, NarL family, capsular synthesis sensor histidine kinase RcsC	9810	Response_reg|HATPase_c|HisKA	NP_810096.1	1350	Glyco_tranf_2_3|HisKA|HATPase_c|Response_reg	Bacteroides thetaiotaomicron VPI-5482	GT2	NO	NO		Q8A8I4
comp9705_c1_seq11	-4.77947	K07677		Two-component system	EC:2.7.13.3	two-component system, NarL family, capsular synthesis sensor histidine kinase RcsC	9723	Response_reg|HATPase_c|HisKA	NP_810096.1	1350	Glyco_tranf_2_3|HisKA|HATPase_c|Response_reg	Bacteroides thetaiotaomicron VPI-5482	GT2	NO	NO		Q8A8I4
comp9705_c1_seq33	-5.25625	K07677		Two-component system	EC:2.7.13.3	two-component system, NarL family, capsular synthesis sensor histidine kinase RcsC	9571	Response_reg|HATPase_c|HisKA	NP_810096.1	1350	Glyco_tranf_2_3|HisKA|HATPase_c|Response_reg	Bacteroides thetaiotaomicron VPI-5482	GT2	NO	NO		Q8A8I4
comp9705_c1_seq18	-6.31743	K07677		Two-component system	EC:2.7.13.3	two-component system, NarL family, capsular synthesis sensor histidine kinase RcsC	9484	Response_reg|HATPase_c|HisKA	NP_810096.1	1350	Glyco_tranf_2_3|HisKA|HATPase_c|Response_reg	Bacteroides thetaiotaomicron VPI-5482	GT2	NO	NO		Q8A8I4
comp4918_c0_seq1	4.58389	K01649		Valine, leucine and isoleucine biosynthesis	EC:2.3.3.13	2-isopropylmalate synthase	4753	adh_short_C2|adh_short|LeuA_dimer|HMGL-like	EAA62552.1	1087	Glyco_hydro_92|adh_short_C2	Aspergillus nidulans FGSC A4	GH92	NO	NO		Q5B238
comp8160_c0_seq16	10.3563	K03845		Various types of N-glycan biosynthesis	EC:2.4.1.258	alpha-1,3-mannosyltransferase	3159	MFS_1|eIF-1a|ALG3	AEO60805.1	459	ALG3	Myceliophthora thermophila ATCC 42464	GT58	NO	NO
comp8160_c0_seq7	8.64264	K03845		Various types of N-glycan biosynthesis	EC:2.4.1.258	alpha-1,3-mannosyltransferase	3216	MFS_1|eIF-1a|ALG3	AEO60805.1	459	ALG3	Myceliophthora thermophila ATCC 42464	GT58	NO	NO
comp4180_c0_seq2	-3.65249	K03843		Various types of N-glycan biosynthesis	EC:2.4.1.132 2.4.1.257	alpha-1,3/alpha-1,6-mannosyltransferase	4355	Glycos_transf_1	AEO59616.1	714	Glycos_transf_1	Myceliophthora thermophila ATCC 42464	GT4	YES	NO
comp4180_c0_seq1	-4.31909	K03843		Various types of N-glycan biosynthesis	EC:2.4.1.132 2.4.1.257	alpha-1,3/alpha-1,6-mannosyltransferase	4234	Glycos_transf_1	AEO59616.1	714	Glycos_transf_1	Myceliophthora thermophila ATCC 42464	GT4	YES	NO
