# Supplementary material for: Tricking Arthrinium malaysianum into Producing Industrially Important Enzymes Under 2-Deoxy D-Glucose Treatment
Source: Front Microbiol. 2016 May 13;7:596. doi: 10.3389/fmicb.2016.00596 (PMC4865484; doi:10.3389/fmicb.2016.00596)
Supplement: Supplementary Table 4 — Pathway analysis and KO IDs of the entire merged (Control + treated) transcripts. [file DataSheet4.xlsx]

## Sheet: clypeatus_transcript
comp9319_c0_seq2 len=2362 path=[2340:0-547 2888:548-922 3263:923-1471 3812:1472-1472 3813:1473-1533 3874:1534-2361]	2362	ATE_C|ATE_N	ADX07294.1	753	Cu-oxidase_3|Cu-oxidase|Cu-oxidase_2	Flammulina velutipes KACC 42777	AA1	NO	NO			Subject UniProtID
comp1212_c0_seq2 len=773 path=[1:0-651 1322:652-772]	773	n/a	CAP67656.1	607	Cu-oxidase_3|Cu-oxidase|Cu-oxidase_2	Podospora anserina S mat+	AA1	n/a	NO
comp8569_c0_seq2 len=4900 path=[4638:0-612 9432:613-727 5251:728-1489 9762:1490-1614 6013:1615-2697 7096:2698-2762 7161:2763-4899]	4900	Cu-oxidase_2|Cu-oxidase|Cu-oxidase_3	CAP71374.1	708	Cu-oxidase_3|Cu-oxidase|Cu-oxidase_2	Podospora anserina S mat+	AA1	NO	NO
comp10895_c0_seq1 len=5159 path=[5137:0-5158]	5159	Cu-oxidase_3|Cu-oxidase|Cu-oxidase_2	AET13878.1	635	Cu-oxidase_3|Cu-oxidase|Cu-oxidase_2	Epichloe festucae E2368	AA1	YES	NO
comp13200_c0_seq1 len=2514 path=[2492:0-2513]	2514	Cu-oxidase_2|Cu-oxidase|Cu-oxidase_3	CAP98129.1	620	Cu-oxidase_3|Cu-oxidase|Cu-oxidase_2	Penicillium chrysogenum Wisconsin 54-1255	AA1	NO	NO		B6HSA6
comp3241_c0_seq2 len=4388 path=[4471:0-355 4908:356-4387]	4388	Cu-oxidase_3|Cu-oxidase|Cu-oxidase_2|PIP5K	ACF87826.1	593	Cu-oxidase_3|Cu-oxidase|Cu-oxidase_2	Zea mays B73	AA1	NO	NO
comp3241_c0_seq2 len=4388 path=[4471:0-355 4908:356-4387]	4388	Cu-oxidase_3|Cu-oxidase|Cu-oxidase_2|PIP5K	ACF85373.1	593	Cu-oxidase_3|Cu-oxidase|Cu-oxidase_2	Zea mays B73	AA1	NO	NO
comp9319_c0_seq6 len=3003 path=[2340:0-547 2888:548-922 3263:923-1471 3812:1472-1472 3813:1473-1533 5887:1534-1593 5948:1594-2065 6420:2066-2087 6442:2088-2159 6514:2160-2174 3874:2175-3002]	3003	ATE_C|ATE_N	ADX07294.1	753	Cu-oxidase_3|Cu-oxidase|Cu-oxidase_2	Flammulina velutipes KACC 42777	AA1	NO	NO
comp113108_c0_seq1 len=396 path=[374:0-395]	396	Cu-oxidase_2	CCK73450.1	656	Cu-oxidase_3|Cu-oxidase|Cu-oxidase_2	Naumovozyma dairenensis CBS 421 type strain:CBS 421	AA1	NO	NO
comp162312_c0_seq1 len=503 path=[481:0-502]	503	Cu-oxidase_3	BAE61606.1	615	Cu-oxidase_3|Cu-oxidase|Cu-oxidase_2	Aspergillus oryzae RIB40	AA1	NO	YES		Q2UA09
comp9319_c0_seq1 len=3174 path=[2340:0-547 2888:548-922 3263:923-1471 5036:1472-1472 5037:1473-1642 3812:1643-1643 3813:1644-1704 5887:1705-1764 5948:1765-2236 6420:2237-2258 6442:2259-2330 6514:2331-2345 3874:2346-3173]	3174	ATE_C|ATE_N	ADX07294.1	753	Cu-oxidase_3|Cu-oxidase|Cu-oxidase_2	Flammulina velutipes KACC 42777	AA1	NO	NO
comp23047_c0_seq1 len=1714 path=[1692:0-1713]	1714	Cu-oxidase_2|Cu-oxidase	CAP64870.1	715	Cu-oxidase_3|Cu-oxidase|Cu-oxidase_2	Podospora anserina S mat+	AA1	NO	NO
comp23047_c0_seq1 len=1714 path=[1692:0-1713]	1714	Cu-oxidase_2|Cu-oxidase	EAA29734.1	713	Cu-oxidase_3|Cu-oxidase|Cu-oxidase_2	Neurospora crassa OR74A	AA1	NO	NO
comp12285_c0_seq1 len=3061 path=[3039:0-3060]	3061	Cu-oxidase_2|Cu-oxidase|Cu-oxidase_3	EDK02827.1	651	Cu-oxidase_3|Cu-oxidase|Cu-oxidase_2	Magnaporthe grisea 70-15	AA1	NO	NO		A4REV6
comp116237_c0_seq1 len=516 path=[494:0-515]	516	Cu-oxidase_3	AFZ32253.1	532	Cu-oxidase_3|Cu-oxidase_2	Gloeocapsa sp. PCC 7428	AA1	NO	YES
comp7111_c0_seq1 len=2646 path=[2624:0-2645]	2646	Cu-oxidase_3|Cu-oxidase|Cu-oxidase_2	CAP67656.1	607	Cu-oxidase_3|Cu-oxidase|Cu-oxidase_2	Podospora anserina S mat+	AA1	YES	NO
comp140336_c0_seq1 len=608 path=[586:0-607]	608	n/a	AAK77953.1	594	Cu-oxidase_3|Cu-oxidase|Cu-oxidase_2	Botryotinia fuckeliana SAS56	AA1	n/a	YES
comp9319_c0_seq5 len=3245 path=[2340:0-547 2888:548-922 3263:923-1471 6879:1472-1478 4972:1479-1542 5036:1543-1543 5037:1544-1713 3812:1714-1714 3813:1715-1775 5887:1776-1835 5948:1836-2307 6420:2308-2329 6442:2330-2401 6514:2402-2416 3874:2417-3244]	3245	ATE_C|ATE_N	ADX07294.1	753	Cu-oxidase_3|Cu-oxidase|Cu-oxidase_2	Flammulina velutipes KACC 42777	AA1	NO	NO
comp8583_c0_seq3 len=2920 path=[1:0-101 103:102-232 234:233-2301 2303:2302-2672 2674:2673-2919]	2920	Helicase_C|DEAD	ACS45199.1	603	Cu-oxidase_3|Cu-oxidase|Cu-oxidase_2	Trichoderma sp. T01	AA1	NO	NO
comp645285_c0_seq1 len=225 path=[225:0-224]	225	Cu-oxidase_3	EAA61461.1	583	Cu-oxidase_3|Cu-oxidase|Cu-oxidase_2	Aspergillus nidulans FGSC A4	AA1	NO	NO		C8VK20
comp1212_c0_seq1 len=675 path=[1:0-651 1437:652-674]	675	Cu-oxidase_2	CAP67656.1	607	Cu-oxidase_3|Cu-oxidase|Cu-oxidase_2	Podospora anserina S mat+	AA1	NO	YES
comp8569_c0_seq8 len=4785 path=[4638:0-612 5251:613-1374 9762:1375-1499 6013:1500-2582 7096:2583-2647 7161:2648-4784]	4785	Cu-oxidase_2|Cu-oxidase|Cu-oxidase_3	CAP71374.1	708	Cu-oxidase_3|Cu-oxidase|Cu-oxidase_2	Podospora anserina S mat+	AA1	NO	NO
comp8569_c0_seq5 len=4660 path=[4638:0-612 5251:613-1374 6013:1375-2457 7096:2458-2522 7161:2523-4659]	4660	Cu-oxidase_2|Cu-oxidase|Cu-oxidase_3	CAP71374.1	708	Cu-oxidase_3|Cu-oxidase|Cu-oxidase_2	Podospora anserina S mat+	AA1	NO	NO
comp118494_c0_seq1 len=536 path=[1:0-535]	536	Cu-oxidase_2	EAA61461.1	583	Cu-oxidase_3|Cu-oxidase|Cu-oxidase_2	Aspergillus nidulans FGSC A4	AA1	NO	YES		C8VK20
comp171709_c0_seq1 len=227 path=[1:0-226]	227	n/a	CCP20645.1	525	Cu-oxidase_2	Bacillus amyloliquefaciens subsp. plantarum UCMB5036	AA1	n/a	NO
comp171709_c0_seq1 len=227 path=[1:0-226]	227	n/a	AFZ89646.1	525	Cu-oxidase_2	Bacillus amyloliquefaciens subsp. plantarum AS43.3	AA1	n/a	NO
comp171709_c0_seq1 len=227 path=[1:0-226]	227	n/a	AGF28771.1	525	Cu-oxidase_2	Bacillus amyloliquefaciens IT-45	AA1	n/a	NO
comp171709_c0_seq1 len=227 path=[1:0-226]	227	n/a	BAM56813.1	525	Cu-oxidase_2	Bacillus subtilis BEST7003	AA1	n/a	NO
comp8569_c0_seq6 len=4710 path=[4638:0-612 9432:613-727 5251:728-1489 6013:1490-2572 7161:2573-4709]	4710	Cu-oxidase_2|Cu-oxidase|Cu-oxidase_3	CAP71374.1	708	Cu-oxidase_3|Cu-oxidase|Cu-oxidase_2	Podospora anserina S mat+	AA1	NO	NO
comp8498_c0_seq1 len=3580 path=[1:0-801 805:802-1745 1749:1746-3579]	3580	Cu-oxidase_3|Cu-oxidase|Cu-oxidase_2	CAE00180.1	636	Cu-oxidase_3|Cu-oxidase|Cu-oxidase_2	Melanocarpus albomyces	AA1	YES	NO	1.10.3.2
comp77162_c0_seq1 len=1147 path=[1:0-1146]	1147	Cu-oxidase_3	CAP67656.1	607	Cu-oxidase_3|Cu-oxidase|Cu-oxidase_2	Podospora anserina S mat+	AA1	NO	NO
comp147822_c0_seq1 len=1016 path=[1:0-1015]	1016	Cu-oxidase_2	AFZ32253.1	532	Cu-oxidase_3|Cu-oxidase_2	Gloeocapsa sp. PCC 7428	AA1	NO	NO
comp8569_c0_seq1 len=4720 path=[4638:0-612 5251:613-1374 9762:1375-1499 6013:1500-2582 7161:2583-4719]	4720	Cu-oxidase_2|Cu-oxidase|Cu-oxidase_3	CAP71374.1	708	Cu-oxidase_3|Cu-oxidase|Cu-oxidase_2	Podospora anserina S mat+	AA1	NO	NO
comp8569_c0_seq7 len=4835 path=[4638:0-612 9432:613-727 5251:728-1489 9762:1490-1614 6013:1615-2697 7161:2698-4834]	4835	Cu-oxidase_2|Cu-oxidase|Cu-oxidase_3	CAP71374.1	708	Cu-oxidase_3|Cu-oxidase|Cu-oxidase_2	Podospora anserina S mat+	AA1	NO	NO
comp8583_c0_seq2 len=317 path=[1:0-101 6068:102-316]	317	n/a	EAA33200.1	744	Cu-oxidase_3|Cu-oxidase|Cu-oxidase_2	Neurospora crassa OR74A	AA1	n/a	NO
comp170193_c0_seq1 len=452 path=[430:0-451]	452	Cu-oxidase	ABM21605.1	597	Cu-oxidase_3|Cu-oxidase|Cu-oxidase_2	Monilinia fructigena	AA1	NO	NO
comp9319_c0_seq4 len=2604 path=[2340:0-547 2888:548-922 3263:923-1471 6879:1472-1478 4972:1479-1542 5036:1543-1543 5037:1544-1713 3812:1714-1714 3813:1715-1775 3874:1776-2603]	2604	ATE_C|ATE_N	ADX07294.1	753	Cu-oxidase_3|Cu-oxidase|Cu-oxidase_2	Flammulina velutipes KACC 42777	AA1	NO	NO
comp8569_c0_seq4 len=4595 path=[4638:0-612 5251:613-1374 6013:1375-2457 7161:2458-4594]	4595	Cu-oxidase_2|Cu-oxidase|Cu-oxidase_3	CAP71374.1	708	Cu-oxidase_3|Cu-oxidase|Cu-oxidase_2	Podospora anserina S mat+	AA1	NO	NO
comp8498_c0_seq2 len=1769 path=[1:0-801 805:802-1745 7358:1746-1768]	1769	Cu-oxidase_3	CAE00180.1	636	Cu-oxidase_3|Cu-oxidase|Cu-oxidase_2	Melanocarpus albomyces	AA1	NO	NO	1.10.3.2
comp8569_c0_seq3 len=4775 path=[4638:0-612 9432:613-727 5251:728-1489 6013:1490-2572 7096:2573-2637 7161:2638-4774]	4775	Cu-oxidase_2|Cu-oxidase|Cu-oxidase_3	CAP71374.1	708	Cu-oxidase_3|Cu-oxidase|Cu-oxidase_2	Podospora anserina S mat+	AA1	NO	NO
comp117119_c0_seq1 len=691 path=[1:0-690]	691	Cu-oxidase|Cu-oxidase_3	ABS19938.1	598	Cu-oxidase_3|Cu-oxidase|Cu-oxidase_2	Fusarium oxysporum 4287	AA1	NO	YES	1.10.3.2
comp9319_c0_seq3 len=2533 path=[2340:0-547 2888:548-922 3263:923-1471 5036:1472-1472 5037:1473-1642 3812:1643-1643 3813:1644-1704 3874:1705-2532]	2533	ATE_C|ATE_N	ADX07294.1	753	Cu-oxidase_3|Cu-oxidase|Cu-oxidase_2	Flammulina velutipes KACC 42777	AA1	NO	NO
comp3241_c0_seq1 len=4469 path=[4471:0-355 4827:356-436 4908:437-4468]	4469	Cu-oxidase_3|Cu-oxidase|Cu-oxidase_2|PIP5K	ACF87826.1	593	Cu-oxidase_3|Cu-oxidase|Cu-oxidase_2	Zea mays B73	AA1	NO	NO
comp3241_c0_seq1 len=4469 path=[4471:0-355 4827:356-436 4908:437-4468]	4469	Cu-oxidase_3|Cu-oxidase|Cu-oxidase_2|PIP5K	ACF85373.1	593	Cu-oxidase_3|Cu-oxidase|Cu-oxidase_2	Zea mays B73	AA1	NO	NO
comp8634_c0_seq2 len=1469 path=[8228:0-676 423:677-714 461:715-766 513:767-816 5458:817-1468]	1469	Ribosomal_L40e|ubiquitin|Rad60-SLD	NP_258300.1	365	ubiquitin|Chitin_bind_3	Spodoptera litura NPV G2	AA10	NO	NO		Q91BI7
comp8634_c0_seq4 len=1658 path=[1:0-421 423:422-459 461:460-511 513:512-561 563:562-1657]	1658	Ribosomal_S27|ubiquitin|Rad60-SLD|Ribosomal_S26e	NP_258300.1	365	ubiquitin|Chitin_bind_3	Spodoptera litura NPV G2	AA10	NO	NO		Q91BI7
comp8634_c0_seq3 len=1913 path=[8228:0-676 423:677-714 461:715-766 513:767-816 563:817-1912]	1913	Ribosomal_L40e|ubiquitin|Rad60-SLD|Ribosomal_S26e	NP_258300.1	365	ubiquitin|Chitin_bind_3	Spodoptera litura NPV G2	AA10	NO	NO		Q91BI7
comp4192_c0_seq1 len=710 path=[713:0-430 1144:431-466 1180:467-481 1195:482-519 1709:520-709]	710	ubiquitin|Rad60-SLD|ubiquitin	NP_258300.1	365	ubiquitin|Chitin_bind_3	Spodoptera litura NPV G2	AA10	NO	NO		Q91BI7
comp5580_c0_seq1 len=5527 path=[1:0-1940 1942:1941-5526]	5527	ubiquitin|XPC-binding	AGE89883.1	350	ubiquitin|Chitin_bind_3	Spodoptera littoralis NPV	AA10	NO	NO
comp10229_c0_seq1 len=917 path=[895:0-916]	917	Rad60-SLD|ubiquitin	NP_258300.1	365	ubiquitin|Chitin_bind_3	Spodoptera litura NPV G2	AA10	NO	NO		Q91BI7
comp8634_c0_seq1 len=1214 path=[1:0-421 423:422-459 461:460-511 513:512-561 5458:562-1213]	1214	Ribosomal_S27|ubiquitin|Rad60-SLD	NP_258300.1	365	ubiquitin|Chitin_bind_3	Spodoptera litura NPV G2	AA10	NO	NO		Q91BI7
comp9489_c0_seq1 len=3543 path=[1:0-2733 2735:2734-3216 3218:3217-3441 3535:3442-3542]	3543	peroxidase|DUF1295	CCF45286.1	436	peroxidase	Colletotrichum higginsianum IMI 349063	AA2	NO	NO
comp9489_c0_seq2 len=3635 path=[1:0-2733 2735:2734-3216 3218:3217-3441 3443:3442-3533 3535:3534-3634]	3635	peroxidase|DUF1295	CCF45286.1	436	peroxidase	Colletotrichum higginsianum IMI 349063	AA2	NO	NO
comp4708_c0_seq1 len=1773 path=[1751:0-903 2655:904-968 2720:969-1772]	1773	peroxidase	AFC37493.1	378	peroxidase|DUF3415	Lenzites gibbosa CB-1	AA2	NO	NO
comp4708_c0_seq1 len=1773 path=[1751:0-903 2655:904-968 2720:969-1772]	1773	peroxidase	AEJ37997.1	377	peroxidase|DUF3415	Polyporus brumalis	AA2	NO	NO
comp10841_c0_seq1 len=2739 path=[2717:0-2738]	2739	peroxidase|peroxidase	AFO84287.1	444	peroxidase	Prorocentrum minimum D-127	AA2	NO	NO
comp10841_c0_seq1 len=2739 path=[2717:0-2738]	2739	peroxidase|peroxidase	AFO84288.1	444	peroxidase	Prorocentrum minimum D-127	AA2	NO	NO
comp13017_c0_seq1 len=2114 path=[1:0-2113]	2114	peroxidase|peroxidase	AFO84287.1	444	peroxidase	Prorocentrum minimum D-127	AA2	NO	NO
comp13017_c0_seq1 len=2114 path=[1:0-2113]	2114	peroxidase|peroxidase	AFO84288.1	444	peroxidase	Prorocentrum minimum D-127	AA2	NO	NO
comp10964_c0_seq1 len=1687 path=[1:0-1686]	1687	peroxidase	ACF85410.1	371	peroxidase	Zea mays B73	AA2	YES	NO
comp6679_c0_seq3 len=1146 path=[2568:0-65 2792:66-69 1514:70-118 1563:119-1145]	1146	n/a	AFO84287.1	444	peroxidase	Prorocentrum minimum D-127	AA2	n/a	NO
comp8121_c0_seq1 len=2044 path=[2023:0-483 2507:484-1373 3398:1374-2043]	2044	peroxidase	AAA61779.1	263	peroxidase	Glycine max	AA2	YES	NO	1.11.1.11
comp10287_c0_seq1 len=1905 path=[1:0-1904]	1905	peroxidase	ACF85410.1	371	peroxidase	Zea mays B73	AA2	YES	NO
comp6679_c0_seq1 len=1306 path=[1284:0-225 2792:226-229 1514:230-278 1563:279-1305]	1306	n/a	AFO84287.1	444	peroxidase	Prorocentrum minimum D-127	AA2	n/a	NO
comp4708_c0_seq2 len=1708 path=[1751:0-903 2720:904-1707]	1708	peroxidase	CCF45286.1	436	peroxidase	Colletotrichum higginsianum IMI 349063	AA2	YES	NO
comp6679_c0_seq2 len=1056 path=[1:0-989 2568:990-1055]	1056	n/a	AFO84287.1	444	peroxidase	Prorocentrum minimum D-127	AA2	n/a	NO
comp8297_c0_seq1 len=2504 path=[2558:0-297 2932:298-1158 3793:1159-2503]	2504	GMC_oxred_C|GMC_oxred_N	ABN82750.1	574	GMC_oxred_N|GMC_oxred_C	Burkholderia pseudomallei 668	AA3	NO	NO
comp8297_c0_seq1 len=2504 path=[2558:0-297 2932:298-1158 3793:1159-2503]	2504	GMC_oxred_C|GMC_oxred_N	ABN02000.1	574	GMC_oxred_N|GMC_oxred_C	Burkholderia mallei NCTC 10229	AA3	NO	NO
comp8297_c0_seq1 len=2504 path=[2558:0-297 2932:298-1158 3793:1159-2503]	2504	GMC_oxred_C|GMC_oxred_N	ABM50132.1	574	GMC_oxred_N|GMC_oxred_C	Burkholderia mallei SAVP1	AA3	NO	NO
comp9017_c0_seq14 len=6135 path=[5965:0-888 6854:889-1251 12123:1252-1399 7217:1400-2805 8623:2806-5083 10901:5084-5142 10960:5143-5245 11063:5246-6134]	6135	OPT|OPT|GMC_oxred_C	CCA74023.1	627	GMC_oxred_N|GMC_oxred_C	Piriformospora indica	AA3	NO	NO
comp4731_c0_seq1 len=1311 path=[1289:0-1205 2495:1206-1310]	1311	GMC_oxred_N|GMC_oxred_N	CAK42323.1	615	GMC_oxred_N|GMC_oxred_C	Aspergillus niger CBS 513.88	AA3	NO	NO
comp9336_c0_seq3 len=3424 path=[6619:0-199 3268:200-737 6839:738-874 3806:875-1422 4354:1423-2032 4964:2033-2094 5026:2095-2218 5150:2219-2284 5216:2285-2303 5235:2304-2558 5577:2559-3423]	3424	GMC_oxred_C	CCA74023.1	627	GMC_oxred_N|GMC_oxred_C	Piriformospora indica	AA3	NO	NO
comp7677_c0_seq2 len=1729 path=[8601:0-0 2478:1-101 2628:102-1728]	1729	GMC_oxred_C	CAK44482.1	637	GMC_oxred_N|GMC_oxred_C	Aspergillus niger CBS 513.88	AA3	NO	NO		A2QEM1
comp10085_c0_seq1 len=5130 path=[1:0-5129]	5130	GMC_oxred_C	AFZ03359.1	1140	GMC_oxred_N	Calothrix sp. PCC 6303	AA3	NO	NO
comp3692_c0_seq1 len=383 path=[361:0-382]	383	GMC_oxred_C	CAK40715.1	601	GMC_oxred_N|GMC_oxred_C	Aspergillus niger CBS 513.88	AA3	NO	NO		A2QWL1
comp8607_c1_seq2 len=1884 path=[4611:0-1509 2400:1510-1883]	1884	GMC_oxred_N	CAK40717.1	566	GMC_oxred_N|GMC_oxred_C	Aspergillus niger CBS 513.88	AA3	NO	NO		A2QWL3
comp9336_c0_seq21 len=3358 path=[6619:0-199 3268:200-737 6839:738-874 3806:875-1422 4354:1423-2032 4964:2033-2094 5026:2095-2218 5216:2219-2237 5235:2238-2492 5577:2493-3357]	3358	GMC_oxred_C	CCA74023.1	627	GMC_oxred_N|GMC_oxred_C	Piriformospora indica	AA3	NO	NO
comp8285_c0_seq5 len=3573 path=[1:0-1477 1561:1478-2301 2385:2302-2383 2467:2384-2726 2892:2727-3572]	3573	GMC_oxred_C|GMC_oxred_N|GMC_oxred_N	CBX90875.1	623	GMC_oxred_N|GMC_oxred_C	Leptosphaeria maculans JN3	AA3	NO	NO
comp9728_c0_seq14 len=4326 path=[7094:0-286 7381:287-1583 8678:1584-1584 8679:1585-2716 9811:2717-2839 9934:2840-2859 9954:2860-3072 10167:3073-3151 10246:3152-3201 10296:3202-3295 10452:3296-3417 10574:3418-4290 15299:4291-4325]	4326	GMC_oxred_C|GMC_oxred_N	CBI59551.1	540	GMC_oxred_C	Sordaria macrospora k-hell	AA3	NO	NO
comp9002_c0_seq2 len=3700 path=[1:0-2809 2811:2810-2902 2904:2903-2958 2960:2959-3699]	3700	GMC_oxred_N|GMC_oxred_C|UcrQ	AFZ04550.1	659	GMC_oxred_N|GMC_oxred_C	Calothrix sp. PCC 6303	AA3	NO	NO
comp168680_c0_seq1 len=311 path=[289:0-310]	311	n/a	BAC71145.1	529	GMC_oxred_N|GMC_oxred_C	Streptomyces avermitilis MA-4680	AA3	n/a	NO
comp168680_c0_seq1 len=311 path=[289:0-310]	311	n/a	AGF62264.1	529	GMC_oxred_N|GMC_oxred_C	Streptomyces hygroscopicus subsp. jinggangensis TL01	AA3	n/a	NO
comp393128_c0_seq1 len=221 path=[1:0-220]	221	n/a	CCA74023.1	627	GMC_oxred_N|GMC_oxred_C	Piriformospora indica	AA3	n/a	NO
comp9336_c0_seq7 len=2265 path=[6619:0-199 3268:200-737 6839:738-874 3806:875-1422 4354:1423-2032 5026:2033-2156 5150:2157-2222 5216:2223-2241 7559:2242-2264]	2265	GMC_oxred_C	CCA74023.1	627	GMC_oxred_N|GMC_oxred_C	Piriformospora indica	AA3	NO	NO
comp7677_c0_seq1 len=2476 path=[6010:0-24 8601:25-25 6036:26-231 6242:232-2475]	2476	GMC_oxred_N|A_deaminase	CAK44482.1	637	GMC_oxred_N|GMC_oxred_C	Aspergillus niger CBS 513.88	AA3	NO	NO		A2QEM1
comp5355_c0_seq1 len=668 path=[646:0-390 1037:391-667]	668	n/a	CCA74023.1	627	GMC_oxred_N|GMC_oxred_C	Piriformospora indica	AA3	n/a	YES
comp9336_c0_seq8 len=3296 path=[6619:0-199 3268:200-737 6839:738-874 3806:875-1422 4354:1423-2032 5026:2033-2156 5216:2157-2175 5235:2176-2430 5577:2431-3295]	3296	GMC_oxred_C|MFS_1	CCA74023.1	627	GMC_oxred_N|GMC_oxred_C	Piriformospora indica	AA3	NO	NO
comp9017_c0_seq6 len=5022 path=[12403:0-40 12874:41-85 6854:86-448 7217:449-1854 8623:1855-4132 11063:4133-5021]	5022	OPT|GMC_oxred_C	CCA74023.1	627	GMC_oxred_N|GMC_oxred_C	Piriformospora indica	AA3	NO	NO
comp9336_c0_seq2 len=3225 path=[6619:0-199 3268:200-737 3806:738-1285 4354:1286-1895 5026:1896-2019 5150:2020-2085 5216:2086-2104 5235:2105-2359 5577:2360-3224]	3225	GMC_oxred_C	CCA74023.1	627	GMC_oxred_N|GMC_oxred_C	Piriformospora indica	AA3	NO	NO
comp9728_c0_seq7 len=4561 path=[7094:0-286 7381:287-1583 8678:1584-1584 8679:1585-2716 9811:2717-2839 9934:2840-2859 9954:2860-3072 14872:3073-3136 10167:3137-3215 14442:3216-3269 10246:3270-3319 14364:3320-3374 10296:3375-3468 10390:3469-3530 10452:3531-3652 10574:3653-4525 15299:4526-4560]	4561	GMC_oxred_C|GMC_oxred_N	AEO61303.1	537	GMC_oxred_N		AA3	NO	NO
comp201531_c0_seq1 len=714 path=[1:0-713]	714	n/a	CCA74023.1	627	GMC_oxred_N|GMC_oxred_C	Piriformospora indica	AA3	n/a	YES
comp9728_c0_seq15 len=6931 path=[7094:0-286 7381:287-1583 8678:1584-1584 8679:1585-2716 9934:2717-2736 9954:2737-2949 10167:2950-3028 10246:3029-3078 10296:3079-3172 10452:3173-3294 10574:3295-4167 11447:4168-6930]	6931	GMC_oxred_C|GMC_oxred_N	CBI59551.1	540	GMC_oxred_C	Sordaria macrospora k-hell	AA3	NO	NO
comp342825_c0_seq1 len=224 path=[202:0-223]	224	GMC_oxred_C	AGF59913.1	517	GMC_oxred_N|GMC_oxred_C	Streptomyces hygroscopicus subsp. jinggangensis TL01	AA3	NO	NO
comp9054_c0_seq3 len=4195 path=[4438:0-2107 6546:2108-2184 6623:2185-2254 6693:2255-2347 6786:2348-2878 7317:2879-3067 7506:3068-3125 7564:3126-4188 8627:4189-4194]	4195	GMC_oxred_C|GMC_oxred_N	AGC65582.1	734	GMC_oxred_N	Simmondsia chinensis	AA3	NO	NO
comp3311_c0_seq2 len=3326 path=[1:0-3139 3141:3140-3194 3196:3195-3325]	3326	GMC_oxred_N|GMC_oxred_C	CBX94187.1	565	GMC_oxred_N	Leptosphaeria maculans JN3	AA3	NO	NO
comp8607_c1_seq1 len=468 path=[2306:0-93 2400:94-467]	468	n/a	CAK40717.1	566	GMC_oxred_N|GMC_oxred_C	Aspergillus niger CBS 513.88	AA3	n/a	YES		A2QWL3
comp9017_c0_seq10 len=5987 path=[5965:0-888 6854:889-1251 7217:1252-2657 8623:2658-4935 10901:4936-4994 10960:4995-5097 11063:5098-5986]	5987	OPT|GMC_oxred_C	CCA74023.1	627	GMC_oxred_N|GMC_oxred_C	Piriformospora indica	AA3	NO	NO
comp8285_c0_seq2 len=3573 path=[1:0-1477 1479:1478-1559 1561:1560-2383 2467:2384-2726 2892:2727-3572]	3573	GMC_oxred_C|GMC_oxred_N	CBX90875.1	623	GMC_oxred_N|GMC_oxred_C	Leptosphaeria maculans JN3	AA3	NO	NO
comp7677_c0_seq3 len=1778 path=[8601:0-0 2478:1-101 2579:102-150 2628:151-1777]	1778	GMC_oxred_C	CAK44482.1	637	GMC_oxred_N|GMC_oxred_C	Aspergillus niger CBS 513.88	AA3	NO	NO		A2QEM1
comp56515_c0_seq1 len=710 path=[688:0-709]	710	GMC_oxred_C	CCA69994.1	667	GMC_oxred_N|GMC_oxred_C	Piriformospora indica	AA3	NO	YES
comp9728_c0_seq18 len=3623 path=[7094:0-286 7381:287-1583 8678:1584-1584 8679:1585-2716 9934:2717-2736 9954:2737-2949 14872:2950-3013 10167:3014-3092 14442:3093-3146 10246:3147-3196 14364:3197-3251 10296:3252-3345 10390:3346-3407 10452:3408-3529 14689:3530-3622]	3623	GMC_oxred_C	CBI59551.1	540	GMC_oxred_C	Sordaria macrospora k-hell	AA3	YES	NO
comp200316_c0_seq1 len=522 path=[500:0-521]	522	GMC_oxred_C	AGB23019.1	665	GMC_oxred_N|GMC_oxred_C	Mycobacterium smegmatis JS623	AA3	NO	NO
comp9728_c0_seq22 len=6993 path=[7094:0-286 7381:287-1583 8678:1584-1584 8679:1585-2716 9934:2717-2736 9954:2737-2949 10167:2950-3028 10246:3029-3078 10296:3079-3172 10390:3173-3234 10452:3235-3356 10574:3357-4229 11447:4230-6992]	6993	GMC_oxred_C|GMC_oxred_N	AEO61303.1	537	GMC_oxred_N		AA3	NO	NO
comp9336_c0_seq5 len=3308 path=[6619:0-199 3268:200-737 3806:738-1285 4354:1286-1895 4964:1896-1957 5026:1958-2081 5216:2082-2100 5235:2101-2355 5490:2356-2442 5577:2443-3307]	3308	GMC_oxred_C	CCA74023.1	627	GMC_oxred_N|GMC_oxred_C	Piriformospora indica	AA3	NO	NO
comp266477_c0_seq1 len=436 path=[414:0-435]	436	n/a	CCA74335.1	684	GMC_oxred_N|GMC_oxred_C	Piriformospora indica	AA3	n/a	NO
comp9485_c0_seq6 len=8318 path=[8366:0-714 9081:715-1242 9609:1243-2044 10411:2045-2788 11155:2789-3187 11554:3188-6511 14948:6512-8317]	8318	Erv26|WBS_methylT|Aldedh|GMC_oxred_C|GMC_oxred_N	ADB41615.1	572	GMC_oxred_N|GMC_oxred_C	Spirosoma linguale DSM 74	AA3	NO	NO		D2QS33
comp9728_c0_seq1 len=3561 path=[7094:0-286 7381:287-1583 8678:1584-1584 8679:1585-2716 9934:2717-2736 9954:2737-2949 14872:2950-3013 10167:3014-3092 14442:3093-3146 10246:3147-3196 14364:3197-3251 10296:3252-3345 10452:3346-3467 14689:3468-3560]	3561	GMC_oxred_C	CBI59551.1	540	GMC_oxred_C	Sordaria macrospora k-hell	AA3	YES	NO
comp9336_c0_seq16 len=3511 path=[6619:0-199 3268:200-737 6839:738-874 3806:875-1422 4354:1423-2032 4964:2033-2094 5026:2095-2218 5150:2219-2284 5216:2285-2303 5235:2304-2558 5490:2559-2645 5577:2646-3510]	3511	GMC_oxred_C	CCA74023.1	627	GMC_oxred_N|GMC_oxred_C	Piriformospora indica	AA3	NO	NO
comp4731_c0_seq2 len=1407 path=[1289:0-1205 2600:1206-1301 2495:1302-1406]	1407	GMC_oxred_N|GMC_oxred_N	CAK42323.1	615	GMC_oxred_N|GMC_oxred_C	Aspergillus niger CBS 513.88	AA3	NO	NO
comp9017_c0_seq15 len=6076 path=[5965:0-888 6854:889-1251 12123:1252-1399 7217:1400-2805 8623:2806-5083 10960:5084-5186 11063:5187-6075]	6076	OPT|OPT|GMC_oxred_C	CCA74023.1	627	GMC_oxred_N|GMC_oxred_C	Piriformospora indica	AA3	NO	NO
comp7656_c0_seq1 len=3007 path=[2911:0-841 5941:842-915 3753:916-997 3835:998-1069 3907:1070-2817 5655:2818-3006]	3007	GMC_oxred_N|GMC_oxred_C	CAK40717.1	566	GMC_oxred_N|GMC_oxred_C	Aspergillus niger CBS 513.88	AA3	YES	NO		A2QWL3
comp52054_c0_seq1 len=2051 path=[1:0-2050]	2051	GMC_oxred_C|GMC_oxred_N	AFZ04550.1	659	GMC_oxred_N|GMC_oxred_C	Calothrix sp. PCC 6303	AA3	NO	NO
comp9017_c0_seq12 len=5825 path=[5965:0-888 6854:889-1251 7217:1252-2657 8623:2658-4935 11063:4936-5824]	5825	OPT|GMC_oxred_C	CCA74023.1	627	GMC_oxred_N|GMC_oxred_C	Piriformospora indica	AA3	NO	NO
comp6970_c0_seq2 len=1454 path=[119:0-1451 5077:1452-1453]	1454	GMC_oxred_N	CAK40717.1	566	GMC_oxred_N|GMC_oxred_C	Aspergillus niger CBS 513.88	AA3	NO	NO		A2QWL3
comp5835_c0_seq1 len=2009 path=[1:0-425 3942:426-502 427:503-1876 1801:1877-2008]	2009	GMC_oxred_N|GMC_oxred_C	XP_500864.1	623	GMC_oxred_N|GMC_oxred_C	Yarrowia lipolytica CLIB122 CLIB99	AA3	YES	NO
comp7933_c0_seq1 len=3190 path=[3229:0-94 3324:95-2520 5788:2521-3179 6447:3180-3189]	3190	GMC_oxred_C|GMC_oxred_N	CAK40715.1	601	GMC_oxred_N|GMC_oxred_C	Aspergillus niger CBS 513.88	AA3	NO	NO		A2QWL1
comp9017_c0_seq5 len=5125 path=[12403:0-40 12874:41-85 6854:86-448 7217:449-1854 8623:1855-4132 10960:4133-4235 11063:4236-5124]	5125	OPT|GMC_oxred_C	CCA74023.1	627	GMC_oxred_N|GMC_oxred_C	Piriformospora indica	AA3	NO	NO
comp9336_c0_seq25 len=3312 path=[6619:0-199 3268:200-737 3806:738-1285 4354:1286-1895 5026:1896-2019 5150:2020-2085 5216:2086-2104 5235:2105-2359 5490:2360-2446 5577:2447-3311]	3312	GMC_oxred_C	CCA74023.1	627	GMC_oxred_N|GMC_oxred_C	Piriformospora indica	AA3	NO	NO
comp3824_c0_seq1 len=6721 path=[1:0-6720]	6721	GMC_oxred_C|GMC_oxred_N	CAK47101.1	555	GMC_oxred_N|GMC_oxred_C	Aspergillus niger CBS 513.88	AA3	NO	NO
comp9054_c0_seq4 len=4137 path=[4438:0-2107 6546:2108-2184 6623:2185-2254 6693:2255-2347 6786:2348-2878 7317:2879-3067 7564:3068-4130 8627:4131-4136]	4137	GMC_oxred_C|GMC_oxred_N	AGC65582.1	734	GMC_oxred_N	Simmondsia chinensis	AA3	NO	NO
comp9533_c0_seq4 len=2260 path=[3243:0-389 7027:390-400 3644:401-463 3707:464-2236 7109:2237-2259]	2260	GMC_oxred_C|GMC_oxred_N	AGC65582.1	734	GMC_oxred_N	Simmondsia chinensis	AA3	NO	NO
comp9336_c0_seq23 len=3159 path=[6619:0-199 3268:200-737 3806:738-1285 4354:1286-1895 5026:1896-2019 5216:2020-2038 5235:2039-2293 5577:2294-3158]	3159	GMC_oxred_C|MFS_1	CCA74023.1	627	GMC_oxred_N|GMC_oxred_C	Piriformospora indica	AA3	NO	NO
comp9728_c0_seq13 len=7104 path=[7094:0-286 7381:287-1583 8678:1584-1584 8679:1585-2716 9934:2717-2736 9954:2737-2949 14872:2950-3013 10167:3014-3092 14442:3093-3146 10246:3147-3196 14364:3197-3251 10296:3252-3345 10452:3346-3467 10574:3468-4340 11447:4341-7103]	7104	GMC_oxred_C|GMC_oxred_N	AEO61303.1	537	GMC_oxred_N		AA3	NO	NO
comp9728_c0_seq16 len=4376 path=[7094:0-286 7381:287-1583 8678:1584-1584 8679:1585-2716 9934:2717-2736 9954:2737-2949 14872:2950-3013 10167:3014-3092 14442:3093-3146 10246:3147-3196 14364:3197-3251 10296:3252-3345 10452:3346-3467 10574:3468-4340 15299:4341-4375]	4376	GMC_oxred_C|GMC_oxred_N	AEO61303.1	537	GMC_oxred_N		AA3	NO	NO
comp8285_c0_seq6 len=3573 path=[1:0-1477 1561:1478-2301 2467:2302-2644 2810:2645-2726 2892:2727-3572]	3573	GMC_oxred_C|GMC_oxred_N	CBX90875.1	623	GMC_oxred_N|GMC_oxred_C	Leptosphaeria maculans JN3	AA3	NO	NO
comp9336_c0_seq1 len=3449 path=[6619:0-199 3268:200-737 6839:738-874 3806:875-1422 4354:1423-2032 5026:2033-2156 5150:2157-2222 5216:2223-2241 5235:2242-2496 5490:2497-2583 5577:2584-3448]	3449	GMC_oxred_C	CCA74023.1	627	GMC_oxred_N|GMC_oxred_C	Piriformospora indica	AA3	NO	NO
comp9728_c0_seq8 len=4499 path=[7094:0-286 7381:287-1583 8678:1584-1584 8679:1585-2716 9811:2717-2839 9934:2840-2859 9954:2860-3072 14872:3073-3136 10167:3137-3215 14442:3216-3269 10246:3270-3319 14364:3320-3374 10296:3375-3468 10452:3469-3590 10574:3591-4463 15299:4464-4498]	4499	GMC_oxred_C|GMC_oxred_N	AEO61303.1	537	GMC_oxred_N		AA3	NO	NO
comp4264_c0_seq1 len=3217 path=[3195:0-3216]	3217	GMC_oxred_N|GMC_oxred_C	AFZ04550.1	659	GMC_oxred_N|GMC_oxred_C	Calothrix sp. PCC 6303	AA3	YES	NO
comp11667_c0_seq1 len=1937 path=[1915:0-1936]	1937	Pyr_redox_2	ACZ43019.1	441	Pyr_redox_2	Thermobaculum terrenum ATCC BAA-798	AA3	YES	NO
comp9336_c0_seq9 len=3287 path=[6619:0-199 3268:200-737 3806:738-1285 4354:1286-1895 4964:1896-1957 5026:1958-2081 5150:2082-2147 5216:2148-2166 5235:2167-2421 5577:2422-3286]	3287	GMC_oxred_C	CCA74023.1	627	GMC_oxred_N|GMC_oxred_C	Piriformospora indica	AA3	NO	NO
comp5835_c0_seq2 len=1932 path=[1:0-425 427:426-1799 1801:1800-1931]	1932	GMC_oxred_N|GMC_oxred_C	AGI69574.1	549	GMC_oxred_N|GMC_oxred_C	Octadecabacter antarcticus 307	AA3	YES	NO
comp9728_c0_seq23 len=7289 path=[7094:0-286 7381:287-1583 8678:1584-1584 8679:1585-2716 9811:2717-2839 9934:2840-2859 9954:2860-3072 14872:3073-3136 10167:3137-3215 14442:3216-3269 10246:3270-3319 14364:3320-3374 10296:3375-3468 10390:3469-3530 10452:3531-3652 10574:3653-4525 11447:4526-7288]	7289	GMC_oxred_C|GMC_oxred_N	AEO61303.1	537	GMC_oxred_N		AA3	NO	NO
comp9728_c0_seq24 len=7166 path=[7094:0-286 7381:287-1583 8678:1584-1584 8679:1585-2716 9934:2717-2736 9954:2737-2949 14872:2950-3013 10167:3014-3092 14442:3093-3146 10246:3147-3196 14364:3197-3251 10296:3252-3345 10390:3346-3407 10452:3408-3529 10574:3530-4402 11447:4403-7165]	7166	GMC_oxred_C|GMC_oxred_N	AEO61303.1	537	GMC_oxred_N		AA3	NO	NO
comp9728_c0_seq12 len=7116 path=[7094:0-286 7381:287-1583 8678:1584-1584 8679:1585-2716 9811:2717-2839 9934:2840-2859 9954:2860-3072 10167:3073-3151 10246:3152-3201 10296:3202-3295 10390:3296-3357 10452:3358-3479 10574:3480-4352 11447:4353-7115]	7116	GMC_oxred_C|GMC_oxred_N	AEO61303.1	537	GMC_oxred_N		AA3	NO	NO
comp9017_c0_seq9 len=5184 path=[12403:0-40 12874:41-85 6854:86-448 7217:449-1854 8623:1855-4132 10901:4133-4191 10960:4192-4294 11063:4295-5183]	5184	OPT|GMC_oxred_C	CCA74023.1	627	GMC_oxred_N|GMC_oxred_C	Piriformospora indica	AA3	NO	NO
comp8285_c0_seq1 len=3655 path=[1:0-1477 1479:1478-1559 1561:1560-2383 2467:2384-2726 2810:2727-2808 2892:2809-3654]	3655	GMC_oxred_C|GMC_oxred_N	CBX90875.1	623	GMC_oxred_N|GMC_oxred_C	Leptosphaeria maculans JN3	AA3	NO	NO
comp8285_c0_seq3 len=3491 path=[1:0-1477 1561:1478-2301 2467:2302-2644 2892:2645-3490]	3491	GMC_oxred_C|GMC_oxred_N	CBX90875.1	623	GMC_oxred_N|GMC_oxred_C	Leptosphaeria maculans JN3	AA3	NO	NO
comp3577_c0_seq1 len=1153 path=[1:0-383 385:384-911 913:912-1152]	1153	GMC_oxred_C	CAK44482.1	637	GMC_oxred_N|GMC_oxred_C	Aspergillus niger CBS 513.88	AA3	NO	NO		A2QEM1
comp7933_c0_seq2 len=3228 path=[3229:0-94 3324:95-2520 5750:2521-2552 5782:2553-2558 5788:2559-3217 6447:3218-3227]	3228	GMC_oxred_C|GMC_oxred_N	CAK40715.1	601	GMC_oxred_N|GMC_oxred_C	Aspergillus niger CBS 513.88	AA3	NO	NO		A2QWL1
comp9017_c0_seq2 len=5928 path=[5965:0-888 6854:889-1251 7217:1252-2657 8623:2658-4935 10960:4936-5038 11063:5039-5927]	5928	OPT|GMC_oxred_C	CCA74023.1	627	GMC_oxred_N|GMC_oxred_C	Piriformospora indica	AA3	NO	NO
comp4314_c0_seq2 len=2604 path=[2475:0-2249 5100:2250-2356 4725:2357-2603]	2604	GMC_oxred_N|GMC_oxred_C|GMC_oxred_C	AFB81353.1	589	GMC_oxred_N|GMC_oxred_C	Emericella nidulans	AA3	NO	NO
comp6098_c0_seq1 len=3192 path=[3031:0-2199 6288:2200-2338 5231:2339-3191]	3192	GMC_oxred_N|GMC_oxred_C	AAS90088.1	656	GMC_oxred_N|GMC_oxred_C	Aspergillus flavus	AA3	YES	NO
comp6098_c0_seq1 len=3192 path=[3031:0-2199 6288:2200-2338 5231:2339-3191]	3192	GMC_oxred_N|GMC_oxred_C	BAE59528.1	656	GMC_oxred_N|GMC_oxred_C	Aspergillus oryzae RIB40	AA3	YES	NO
comp7656_c0_seq2 len=2861 path=[2911:0-841 3753:842-923 3907:924-2671 5655:2672-2860]	2861	GMC_oxred_N|GMC_oxred_C	CAK40717.1	566	GMC_oxred_N|GMC_oxred_C	Aspergillus niger CBS 513.88	AA3	YES	NO		A2QWL3
comp2384_c0_seq1 len=708 path=[686:0-707]	708	GMC_oxred_C	CAK42323.1	615	GMC_oxred_N|GMC_oxred_C	Aspergillus niger CBS 513.88	AA3	NO	YES
comp9054_c0_seq5 len=4060 path=[4438:0-2107 6623:2108-2177 6693:2178-2270 6786:2271-2801 7317:2802-2990 7564:2991-4053 8627:4054-4059]	4060	GMC_oxred_C|GMC_oxred_N	AGC65582.1	734	GMC_oxred_N	Simmondsia chinensis	AA3	NO	NO
comp9728_c0_seq5 len=4265 path=[7094:0-286 7381:287-1583 8678:1584-1584 8679:1585-2716 9934:2717-2736 9954:2737-2949 10167:2950-3028 10246:3029-3078 10296:3079-3172 10390:3173-3234 10452:3235-3356 10574:3357-4229 15299:4230-4264]	4265	GMC_oxred_C|GMC_oxred_N	AEO61303.1	537	GMC_oxred_N		AA3	NO	NO
comp3311_c0_seq1 len=3271 path=[1:0-3139 3196:3140-3270]	3271	GMC_oxred_N|GMC_oxred_C	CBX94187.1	565	GMC_oxred_N	Leptosphaeria maculans JN3	AA3	NO	NO
comp9336_c0_seq13 len=3374 path=[6619:0-199 3268:200-737 3806:738-1285 4354:1286-1895 4964:1896-1957 5026:1958-2081 5150:2082-2147 5216:2148-2166 5235:2167-2421 5490:2422-2508 5577:2509-3373]	3374	GMC_oxred_C	CCA74023.1	627	GMC_oxred_N|GMC_oxred_C	Piriformospora indica	AA3	NO	NO
comp9017_c0_seq4 len=5973 path=[5965:0-888 6854:889-1251 12123:1252-1399 7217:1400-2805 8623:2806-5083 11063:5084-5972]	5973	OPT|OPT|GMC_oxred_C	CCA74023.1	627	GMC_oxred_N|GMC_oxred_C	Piriformospora indica	AA3	NO	NO
comp9336_c0_seq15 len=3445 path=[6619:0-199 3268:200-737 6839:738-874 3806:875-1422 4354:1423-2032 4964:2033-2094 5026:2095-2218 5216:2219-2237 5235:2238-2492 5490:2493-2579 5577:2580-3444]	3445	GMC_oxred_C	CCA74023.1	627	GMC_oxred_N|GMC_oxred_C	Piriformospora indica	AA3	NO	NO
comp9728_c0_seq4 len=4438 path=[7094:0-286 7381:287-1583 8678:1584-1584 8679:1585-2716 9934:2717-2736 9954:2737-2949 14872:2950-3013 10167:3014-3092 14442:3093-3146 10246:3147-3196 14364:3197-3251 10296:3252-3345 10390:3346-3407 10452:3408-3529 10574:3530-4402 15299:4403-4437]	4438	GMC_oxred_C|GMC_oxred_N	AEO61303.1	537	GMC_oxred_N		AA3	NO	NO
comp9017_c0_seq11 len=5332 path=[12403:0-40 12874:41-85 6854:86-448 12123:449-596 7217:597-2002 8623:2003-4280 10901:4281-4339 10960:4340-4442 11063:4443-5331]	5332	OPT|GMC_oxred_C	CCA74023.1	627	GMC_oxred_N|GMC_oxred_C	Piriformospora indica	AA3	NO	NO
comp9485_c0_seq2 len=8458 path=[8366:0-714 17781:715-854 9081:855-1382 9609:1383-2184 10411:2185-2928 11155:2929-3327 11554:3328-6651 14948:6652-8457]	8458	Erv26|WBS_methylT|Aldedh|GMC_oxred_C|GMC_oxred_N	ADB41615.1	572	GMC_oxred_N|GMC_oxred_C	Spirosoma linguale DSM 74	AA3	NO	NO		D2QS33
comp22381_c0_seq1 len=1846 path=[1:0-1845]	1846	Pyr_redox_2|Pyr_redox	ACZ43019.1	441	Pyr_redox_2	Thermobaculum terrenum ATCC BAA-798	AA3	NO	NO
comp9485_c0_seq1 len=5641 path=[17329:0-79 17409:80-111 11155:112-510 11554:511-3834 14948:3835-5640]	5641	WBS_methylT|Aldedh|GMC_oxred_C|GMC_oxred_N	ADB41615.1	572	GMC_oxred_N|GMC_oxred_C	Spirosoma linguale DSM 74	AA3	NO	NO		D2QS33
comp8285_c0_seq7 len=3655 path=[1:0-1477 1561:1478-2301 2385:2302-2383 2467:2384-2726 2810:2727-2808 2892:2809-3654]	3655	GMC_oxred_C|GMC_oxred_N|GMC_oxred_N	CBX90875.1	623	GMC_oxred_N|GMC_oxred_C	Leptosphaeria maculans JN3	AA3	NO	NO
comp3676_c0_seq1 len=1789 path=[1767:0-1788]	1789	GMC_oxred_N|GMC_oxred_N|GMC_oxred_C	CCA67046.1	712	GMC_oxred_N|GMC_oxred_N|GMC_oxred_C	Piriformospora indica	AA3	YES	NO
comp492_c0_seq1 len=684 path=[662:0-78 741:79-683]	684	GMC_oxred_N	CCA74023.1	627	GMC_oxred_N|GMC_oxred_C	Piriformospora indica	AA3	NO	YES
comp6096_c0_seq1 len=3249 path=[1:0-3248]	3249	Pyr_redox_2	ACZ43019.1	441	Pyr_redox_2	Thermobaculum terrenum ATCC BAA-798	AA3	YES	NO
comp72745_c0_seq1 len=874 path=[852:0-873]	874	n/a	CBX90875.1	623	GMC_oxred_N|GMC_oxred_C	Leptosphaeria maculans JN3	AA3	n/a	NO
comp9336_c0_seq6 len=3362 path=[6619:0-199 3268:200-737 6839:738-874 3806:875-1422 4354:1423-2032 5026:2033-2156 5150:2157-2222 5216:2223-2241 5235:2242-2496 5577:2497-3361]	3362	GMC_oxred_C	CCA74023.1	627	GMC_oxred_N|GMC_oxred_C	Piriformospora indica	AA3	NO	NO
comp189303_c0_seq1 len=253 path=[1:0-252]	253	n/a	CCA75795.1	629	GMC_oxred_N|GMC_oxred_C	Piriformospora indica	AA3	n/a	NO
comp7458_c0_seq2 len=4632 path=[4532:0-3166 9183:3167-3244 7699:3245-3249 7704:3250-4631]	4632	GMC_oxred_N|GMC_oxred_C	CAK44482.1	637	GMC_oxred_N|GMC_oxred_C	Aspergillus niger CBS 513.88	AA3	YES	NO		A2QEM1
comp199614_c0_seq1 len=592 path=[570:0-591]	592	GMC_oxred_N	AAC49318.1	656	GMC_oxred_N|GMC_oxred_C	Aspergillus parasiticus Su-1; ATCC 56775	AA3	NO	YES
comp9017_c0_seq8 len=5170 path=[12403:0-40 12874:41-85 6854:86-448 12123:449-596 7217:597-2002 8623:2003-4280 11063:4281-5169]	5170	OPT|GMC_oxred_C	CCA74023.1	627	GMC_oxred_N|GMC_oxred_C	Piriformospora indica	AA3	NO	NO
comp9728_c0_seq2 len=7227 path=[7094:0-286 7381:287-1583 8678:1584-1584 8679:1585-2716 9811:2717-2839 9934:2840-2859 9954:2860-3072 14872:3073-3136 10167:3137-3215 14442:3216-3269 10246:3270-3319 14364:3320-3374 10296:3375-3468 10452:3469-3590 10574:3591-4463 11447:4464-7226]	7227	GMC_oxred_C|GMC_oxred_N	AEO61303.1	537	GMC_oxred_N		AA3	NO	NO
comp6264_c0_seq1 len=3161 path=[1:0-3160]	3161	GMC_oxred_C|GMC_oxred_N	AFZ04550.1	659	GMC_oxred_N|GMC_oxred_C	Calothrix sp. PCC 6303	AA3	NO	NO
comp9017_c0_seq13 len=5273 path=[12403:0-40 12874:41-85 6854:86-448 12123:449-596 7217:597-2002 8623:2003-4280 10960:4281-4383 11063:4384-5272]	5273	OPT|GMC_oxred_C	CCA74023.1	627	GMC_oxred_N|GMC_oxred_C	Piriformospora indica	AA3	NO	NO
comp9485_c0_seq5 len=1876 path=[14878:0-69 14948:70-1875]	1876	GMC_oxred_C|GMC_oxred_N	AGI69574.1	549	GMC_oxred_N|GMC_oxred_C	Octadecabacter antarcticus 307	AA3	NO	NO
comp9533_c0_seq5 len=2197 path=[3243:0-389 7027:390-400 3707:401-2173 7109:2174-2196]	2197	GMC_oxred_C|GMC_oxred_N	AGC65582.1	734	GMC_oxred_N	Simmondsia chinensis	AA3	NO	NO
comp43506_c0_seq1 len=658 path=[1:0-657]	658	GMC_oxred_C	XP_002499369.1	539	GMC_oxred_N|GMC_oxred_C	Zygosaccharomyces rouxii CBS 732	AA3	NO	YES
comp9054_c0_seq1 len=4118 path=[4438:0-2107 6623:2108-2177 6693:2178-2270 6786:2271-2801 7317:2802-2990 7506:2991-3048 7564:3049-4111 8627:4112-4117]	4118	GMC_oxred_C|GMC_oxred_N	AGC65582.1	734	GMC_oxred_N	Simmondsia chinensis	AA3	NO	NO
comp9728_c0_seq21 len=3388 path=[7094:0-286 7381:287-1583 8678:1584-1584 8679:1585-2716 9934:2717-2736 9954:2737-2949 10167:2950-3028 10246:3029-3078 10296:3079-3172 10452:3173-3294 14689:3295-3387]	3388	GMC_oxred_C	CBI59551.1	540	GMC_oxred_C	Sordaria macrospora k-hell	AA3	YES	NO
comp9728_c0_seq6 len=4203 path=[7094:0-286 7381:287-1583 8678:1584-1584 8679:1585-2716 9934:2717-2736 9954:2737-2949 10167:2950-3028 10246:3029-3078 10296:3079-3172 10452:3173-3294 10574:3295-4167 15299:4168-4202]	4203	GMC_oxred_C|GMC_oxred_N	CBI59551.1	540	GMC_oxred_C	Sordaria macrospora k-hell	AA3	NO	NO
comp6970_c0_seq1 len=1598 path=[1:0-117 119:118-1569 1571:1570-1597]	1598	GMC_oxred_N	CAK40717.1	566	GMC_oxred_N|GMC_oxred_C	Aspergillus niger CBS 513.88	AA3	NO	NO		A2QWL3
comp9728_c0_seq20 len=3450 path=[7094:0-286 7381:287-1583 8678:1584-1584 8679:1585-2716 9934:2717-2736 9954:2737-2949 10167:2950-3028 10246:3029-3078 10296:3079-3172 10390:3173-3234 10452:3235-3356 14689:3357-3449]	3450	GMC_oxred_C	CBI59551.1	540	GMC_oxred_C	Sordaria macrospora k-hell	AA3	YES	NO
comp9728_c0_seq3 len=4388 path=[7094:0-286 7381:287-1583 8678:1584-1584 8679:1585-2716 9811:2717-2839 9934:2840-2859 9954:2860-3072 10167:3073-3151 10246:3152-3201 10296:3202-3295 10390:3296-3357 10452:3358-3479 10574:3480-4352 15299:4353-4387]	4388	GMC_oxred_C|GMC_oxred_N	AEO61303.1	537	GMC_oxred_N		AA3	NO	NO
comp914_c0_seq1 len=466 path=[444:0-465]	466	n/a	AFZ04550.1	659	GMC_oxred_N|GMC_oxred_C	Calothrix sp. PCC 6303	AA3	n/a	NO
comp6098_c0_seq2 len=3053 path=[3031:0-2199 5231:2200-3052]	3053	GMC_oxred_N|GMC_oxred_C	AAS90088.1	656	GMC_oxred_N|GMC_oxred_C	Aspergillus flavus	AA3	YES	NO
comp6098_c0_seq2 len=3053 path=[3031:0-2199 5231:2200-3052]	3053	GMC_oxred_N|GMC_oxred_C	BAE59528.1	656	GMC_oxred_N|GMC_oxred_C	Aspergillus oryzae RIB40	AA3	YES	NO
comp9336_c0_seq18 len=3221 path=[6619:0-199 3268:200-737 3806:738-1285 4354:1286-1895 4964:1896-1957 5026:1958-2081 5216:2082-2100 5235:2101-2355 5577:2356-3220]	3221	GMC_oxred_C	CCA74023.1	627	GMC_oxred_N|GMC_oxred_C	Piriformospora indica	AA3	NO	NO
comp8607_c0_seq1 len=1885 path=[1:0-1884]	1885	GMC_oxred_C	CAK40717.1	566	GMC_oxred_N|GMC_oxred_C	Aspergillus niger CBS 513.88	AA3	NO	NO		A2QWL3
comp10429_c0_seq1 len=2556 path=[2534:0-2555]	2556	Pyr_redox|Pyr_redox_2	ACZ43019.1	441	Pyr_redox_2	Thermobaculum terrenum ATCC BAA-798	AA3	NO	NO
comp9336_c0_seq14 len=3383 path=[6619:0-199 3268:200-737 6839:738-874 3806:875-1422 4354:1423-2032 5026:2033-2156 5216:2157-2175 5235:2176-2430 5490:2431-2517 5577:2518-3382]	3383	GMC_oxred_C	CCA74023.1	627	GMC_oxred_N|GMC_oxred_C	Piriformospora indica	AA3	NO	NO
comp8297_c0_seq2 len=2580 path=[2558:0-297 2856:298-373 2932:374-1234 3793:1235-2579]	2580	GMC_oxred_C|GMC_oxred_N	ABN82750.1	574	GMC_oxred_N|GMC_oxred_C	Burkholderia pseudomallei 668	AA3	NO	NO
comp8297_c0_seq2 len=2580 path=[2558:0-297 2856:298-373 2932:374-1234 3793:1235-2579]	2580	GMC_oxred_C|GMC_oxred_N	ABN02000.1	574	GMC_oxred_N|GMC_oxred_C	Burkholderia mallei NCTC 10229	AA3	NO	NO
comp8297_c0_seq2 len=2580 path=[2558:0-297 2856:298-373 2932:374-1234 3793:1235-2579]	2580	GMC_oxred_C|GMC_oxred_N	ABM50132.1	574	GMC_oxred_N|GMC_oxred_C	Burkholderia mallei SAVP1	AA3	NO	NO
comp8285_c0_seq4 len=3655 path=[1:0-1477 1479:1478-1559 1561:1560-2383 2385:2384-2465 2467:2466-2808 2892:2809-3654]	3655	GMC_oxred_C|GMC_oxred_N|GMC_oxred_N	CBX90875.1	623	GMC_oxred_N|GMC_oxred_C	Leptosphaeria maculans JN3	AA3	NO	NO
comp9728_c0_seq9 len=3573 path=[7094:0-286 7381:287-1583 8678:1584-1584 8679:1585-2716 9811:2717-2839 9934:2840-2859 9954:2860-3072 10167:3073-3151 10246:3152-3201 10296:3202-3295 10390:3296-3357 10452:3358-3479 14689:3480-3572]	3573	GMC_oxred_C	CBI59551.1	540	GMC_oxred_C	Sordaria macrospora k-hell	AA3	YES	NO
comp9485_c0_seq8 len=7233 path=[17091:0-157 9609:158-959 10411:960-1703 11155:1704-2102 11554:2103-5426 14948:5427-7232]	7233	Erv26|WBS_methylT|Aldedh|GMC_oxred_C|GMC_oxred_N	ADB41615.1	572	GMC_oxred_N|GMC_oxred_C	Spirosoma linguale DSM 74	AA3	NO	NO		D2QS33
comp9728_c0_seq10 len=7054 path=[7094:0-286 7381:287-1583 8678:1584-1584 8679:1585-2716 9811:2717-2839 9934:2840-2859 9954:2860-3072 10167:3073-3151 10246:3152-3201 10296:3202-3295 10452:3296-3417 10574:3418-4290 11447:4291-7053]	7054	GMC_oxred_C|GMC_oxred_N	CBI59551.1	540	GMC_oxred_C	Sordaria macrospora k-hell	AA3	NO	NO
comp81705_c0_seq1 len=1214 path=[1:0-1213]	1214	GMC_oxred_N	CCA67046.1	712	GMC_oxred_N|GMC_oxred_N|GMC_oxred_C	Piriformospora indica	AA3	NO	NO
comp174015_c0_seq1 len=263 path=[241:0-262]	263	n/a	CCA68826.1	578	GMC_oxred_N	Piriformospora indica	AA3	n/a	NO
comp7458_c0_seq1 len=4549 path=[4532:0-3166 7704:3167-4548]	4549	GMC_oxred_N|GMC_oxred_C	CAK44482.1	637	GMC_oxred_N|GMC_oxred_C	Aspergillus niger CBS 513.88	AA3	YES	NO		A2QEM1
comp68206_c0_seq1 len=607 path=[585:0-606]	607	n/a	CAK44482.1	637	GMC_oxred_N|GMC_oxred_C	Aspergillus niger CBS 513.88	AA3	n/a	YES		A2QEM1
comp9728_c0_seq17 len=3511 path=[7094:0-286 7381:287-1583 8678:1584-1584 8679:1585-2716 9811:2717-2839 9934:2840-2859 9954:2860-3072 10167:3073-3151 10246:3152-3201 10296:3202-3295 10452:3296-3417 14689:3418-3510]	3511	GMC_oxred_C	CBI59551.1	540	GMC_oxred_C	Sordaria macrospora k-hell	AA3	YES	NO
comp10521_c0_seq1 len=2271 path=[1:0-2270]	2271	Pyr_redox_2|Pyr_redox	ACZ43019.1	441	Pyr_redox_2	Thermobaculum terrenum ATCC BAA-798	AA3	NO	NO
comp8285_c0_seq8 len=3737 path=[1:0-1477 1479:1478-1559 1561:1560-2383 2385:2384-2465 2467:2466-2808 2810:2809-2890 2892:2891-3736]	3737	GMC_oxred_C|GMC_oxred_N|GMC_oxred_N	CBX90875.1	623	GMC_oxred_N|GMC_oxred_C	Leptosphaeria maculans JN3	AA3	NO	NO
comp9336_c0_seq10 len=3246 path=[6619:0-199 3268:200-737 3806:738-1285 4354:1286-1895 5026:1896-2019 5216:2020-2038 5235:2039-2293 5490:2294-2380 5577:2381-3245]	3246	GMC_oxred_C	CCA74023.1	627	GMC_oxred_N|GMC_oxred_C	Piriformospora indica	AA3	NO	NO
comp4314_c0_seq1 len=2497 path=[2475:0-2249 4725:2250-2496]	2497	GMC_oxred_N|GMC_oxred_C	AFB81353.1	589	GMC_oxred_N|GMC_oxred_C	Emericella nidulans	AA3	YES	NO
comp41750_c0_seq1 len=1078 path=[1:0-1077]	1078	n/a	GAA91858.1	945	GMC_oxred_N|GMC_oxred_C	Aspergillus kawachii IFO 4308	AA3|AA8	n/a	YES
comp11213_c0_seq1 len=1862 path=[1:0-1861]	1862	GMC_oxred_N|GMC_oxred_C	CCF31824.1	804	GMC_oxred_N|GMC_oxred_C	Colletotrichum higginsianum IMI 349063	AA3|AA8	YES	NO
comp8226_c0_seq1 len=751 path=[7668:0-110 6786:111-750]	751	GMC_oxred_C	CAP61651.1	805	GMC_oxred_N|GMC_oxred_C	Podospora anserina S mat+	AA3|AA8	NO	YES
comp6596_c0_seq1 len=3133 path=[3111:0-3013 6125:3014-3132]	3133	GMC_oxred_N|GMC_oxred_C	CCF31824.1	804	GMC_oxred_N|GMC_oxred_C	Colletotrichum higginsianum IMI 349063	AA3|AA8	YES	NO
comp10705_c0_seq1 len=3836 path=[3814:0-3835]	3836	n/a	BAD32781.1	787	GMC_oxred_N|GMC_oxred_C	Coniophora puteana WD-758	AA3|AA8	n/a	NO
comp8226_c0_seq2 len=3779 path=[3702:0-2233 7502:2234-2288 5936:2289-3138 6786:3139-3778]	3779	GMC_oxred_N|GMC_oxred_C	ADT70776.1	815	GMC_oxred_N|GMC_oxred_C	Hypoxylon haematostroma CBS 255.63	AA3|AA8	YES	NO	1.1.99.18
comp8226_c0_seq3 len=3724 path=[3702:0-2233 5936:2234-3083 6786:3084-3723]	3724	GMC_oxred_N|GMC_oxred_C	ADT70776.1	815	GMC_oxred_N|GMC_oxred_C	Hypoxylon haematostroma CBS 255.63	AA3|AA8	YES	NO	1.1.99.18
comp7409_c0_seq1 len=3767 path=[1:0-1676 1678:1677-3766]	3767	CBM_1|GMC_oxred_C|GMC_oxred_N	ADT70775.1	858	GMC_oxred_N|GMC_oxred_C	Hypoxylon haematostroma CBS 255.63	AA3|AA8|CBM1	NO	NO
comp7529_c0_seq4 len=3593 path=[3520:0-1164 7060:1165-1215 4685:1216-3471 6941:3472-3521 6991:3522-3592]	3593	FAD-oxidase_C|FAD_binding_4	AFT66533.1	535	FAD_binding_4|FAD-oxidase_C	Cycloclasticus sp. P1 P1; MCCC 1A01040	AA4	NO	NO
comp7529_c0_seq1 len=3492 path=[3520:0-1164 4685:1165-3420 6991:3421-3491]	3492	FAD-oxidase_C|FAD_binding_4	AFT66533.1	535	FAD_binding_4|FAD-oxidase_C	Cycloclasticus sp. P1 P1; MCCC 1A01040	AA4	NO	NO
comp3216_c0_seq2 len=5244 path=[1:0-4586 10170:4587-4734 4588:4735-5243]	5244	FAD-oxidase_C|FAD_binding_4	AGL20666.1	529	FAD_binding_4|FAD-oxidase_C	Actinoplanes sp. N902-109	AA4	NO	NO
comp7529_c0_seq2 len=3543 path=[3520:0-1164 7060:1165-1215 4685:1216-3471 6991:3472-3542]	3543	FAD-oxidase_C|FAD_binding_4	AFT66533.1	535	FAD_binding_4|FAD-oxidase_C	Cycloclasticus sp. P1 P1; MCCC 1A01040	AA4	NO	NO
comp3216_c0_seq1 len=5096 path=[1:0-4586 4588:4587-5095]	5096	FAD-oxidase_C|FAD_binding_4	AGL20666.1	529	FAD_binding_4|FAD-oxidase_C	Actinoplanes sp. N902-109	AA4	NO	NO
comp7864_c0_seq1 len=3896 path=[1:0-3895]	3896	FAD_binding_4|FAD-oxidase_C|zf-Tim10_DDP|Ribosomal_L23|Ribosomal_L23eN	AGL20666.1	529	FAD_binding_4|FAD-oxidase_C	Actinoplanes sp. N902-109	AA4	NO	NO
comp7529_c0_seq3 len=3542 path=[3520:0-1164 4685:1165-3420 6941:3421-3470 6991:3471-3541]	3542	FAD-oxidase_C|FAD_binding_4	AFT66533.1	535	FAD_binding_4|FAD-oxidase_C	Cycloclasticus sp. P1 P1; MCCC 1A01040	AA4	NO	NO
comp5431_c0_seq1 len=2094 path=[2013:0-587 4130:588-646 2601:647-2093]	2094	WSC	ABD61574.1	777	WSC|WSC|Glyoxal_oxid_N|DUF1929	Phanerochaete chrysosporium	AA5	NO	NO
comp9316_c0_seq3 len=2910 path=[7813:0-4 765:5-95 856:96-2294 3055:2295-2909]	2910	n/a	AGC43789.1	NA	n/a	Myxococcus stipitatus DSM 14675	AA5	n/a	n/a
comp100142_c0_seq1 len=798 path=[776:0-797]	798	WSC	ABD61574.1	777	WSC|WSC|Glyoxal_oxid_N|DUF1929	Phanerochaete chrysosporium	AA5	NO	YES
comp6063_c0_seq2 len=13731 path=[13709:0-2213 15923:2214-13506 27216:13507-13730]	13731	WSC|WSC|WSC|WSC|Glyoxal_oxid_N|DUF1929	CCA72580.1	1315	WSC|WSC|WSC|WSC|WSC|WSC|Glyoxal_oxid_N|DUF1929	Piriformospora indica	AA5	NO	NO
comp4761_c0_seq1 len=3469 path=[3447:0-565 4013:566-3468]	3469	DUF1929|Glyoxal_oxid_N|WSC|WSC|WSC	CCA72580.1	1315	WSC|WSC|WSC|WSC|WSC|WSC|Glyoxal_oxid_N|DUF1929	Piriformospora indica	AA5	NO	NO
comp6063_c0_seq1 len=11541 path=[27519:0-23 15923:24-11316 27216:11317-11540]	11541	WSC|WSC|Glyoxal_oxid_N|DUF1929	ABD61574.1	777	WSC|WSC|Glyoxal_oxid_N|DUF1929	Phanerochaete chrysosporium	AA5	YES	NO
comp2832_c0_seq1 len=5706 path=[5684:0-5705]	5706	WSC|WSC|WSC|WSC|WSC	CCA72580.1	1315	WSC|WSC|WSC|WSC|WSC|WSC|Glyoxal_oxid_N|DUF1929	Piriformospora indica	AA5	NO	NO
comp50824_c0_seq1 len=455 path=[433:0-454]	455	WSC	CCA72580.1	1315	WSC|WSC|WSC|WSC|WSC|WSC|Glyoxal_oxid_N|DUF1929	Piriformospora indica	AA5	NO	NO
comp7446_c0_seq1 len=3740 path=[1:0-991 993:992-1103 1105:1104-3739]	3740	WSC|WSC|peroxidase	CCA72580.1	1315	WSC|WSC|WSC|WSC|WSC|WSC|Glyoxal_oxid_N|DUF1929	Piriformospora indica	AA5	NO	NO
comp7806_c0_seq1 len=3292 path=[3270:0-1446 4717:1447-1654 4925:1655-2366 5637:2367-3291]	3292	WSC	CCA72580.1	1315	WSC|WSC|WSC|WSC|WSC|WSC|Glyoxal_oxid_N|DUF1929	Piriformospora indica	AA5	NO	NO
comp9316_c0_seq1 len=3592 path=[1:0-259 261:260-447 449:448-757 7813:758-762 7348:763-777 856:778-2976 3055:2977-3591]	3592	n/a	AGC43789.1	NA	n/a	Myxococcus stipitatus DSM 14675	AA5	n/a	n/a
comp73311_c0_seq1 len=1045 path=[1:0-1044]	1045	n/a	CCA74522.1	1556	WSC|WSC|WSC|WSC|WSC|WSC|Glyoxal_oxid_N|DUF1929	Piriformospora indica	AA5	n/a	NO
comp9893_c0_seq1 len=4495 path=[4473:0-4494]	4495	FMN_red|Flavodoxin_1|MFS_1|MFS_2|MFS_1	CAP60339.1	NA	n/a	Podospora anserina S mat+	AA6	n/a	n/a
comp9400_c1_seq1 len=2829 path=[1:0-368 370:369-2828]	2829	n/a	AFT88228.1	475	FAD_binding_4|BBE	Burkholderia phenoliruptrix BR3459a	AA7	n/a	NO
comp5289_c0_seq2 len=680 path=[540:0-162 1101:163-280 703:281-679]	680	FAD_binding_4	BAM73633.1	471	FAD_binding_4	Streptomyces sp. WK-5344	AA7	YES	NO
comp9567_c0_seq5 len=1543 path=[1:0-266 268:267-690 692:691-1511 10074:1512-1513 1515:1514-1542]	1543	FAD_binding_4	AFT99467.1	495	FAD_binding_4	Nocardia brasiliensis ATCC 700358 HUJEG-1	AA7	YES	NO
comp2782_c0_seq1 len=2446 path=[1:0-2445]	2446	FAD_binding_4	AGF65600.1	474	FAD_binding_4|BBE	Streptomyces hygroscopicus subsp. jinggangensis TL01	AA7	NO	NO
comp36449_c0_seq1 len=1680 path=[1:0-1679]	1680	FAD_binding_4	CCK29139.1	530	FAD_binding_4	Streptomyces davawensis JCM 4913	AA7	YES	NO
comp7179_c0_seq1 len=1255 path=[5291:0-61 1425:62-957 2321:958-1254]	1255	n/a	AFS12240.1	468	FAD_binding_4	Mycobacterium indicus pranii MTCC 9506	AA7	n/a	NO
comp8170_c1_seq1 len=1660 path=[1:0-1165 1167:1166-1499 6260:1500-1549 6310:1550-1568 1501:1569-1659]	1660	BBE|FAD_binding_4	CCA70426.1	533	FAD_binding_4	Piriformospora indica	AA7	NO	NO
comp8656_c0_seq2 len=3685 path=[228:0-40 9982:41-42 271:43-191 420:192-3144 3373:3145-3561 3790:3562-3684]	3685	FAD_binding_4|BBE	CBI58520.1	515	FAD_binding_4	Sordaria macrospora k-hell	AA7	NO	NO
comp3043_c0_seq2 len=2747 path=[2725:0-1283 4009:1284-2746]	2747	BBE|FAD_binding_4	AGF65600.1	474	FAD_binding_4|BBE	Streptomyces hygroscopicus subsp. jinggangensis TL01	AA7	NO	NO
comp8118_c1_seq1 len=2224 path=[3110:0-1623 4734:1624-2223]	2224	FAD_binding_4	CCK29139.1	530	FAD_binding_4	Streptomyces davawensis JCM 4913	AA7	YES	NO
comp5181_c0_seq1 len=1373 path=[1:0-224 226:225-284 286:285-1372]	1373	n/a	AFT88228.1	475	FAD_binding_4|BBE	Burkholderia phenoliruptrix BR3459a	AA7	n/a	NO
comp4124_c0_seq1 len=8913 path=[8891:0-4397 13289:4398-8912]	8913	DEP|RhoGEF|CNH|ALO|FAD_binding_4	CBI58520.1	515	FAD_binding_4	Sordaria macrospora k-hell	AA7	NO	NO
comp4124_c0_seq1 len=8913 path=[8891:0-4397 13289:4398-8912]	8913	DEP|RhoGEF|CNH|ALO|FAD_binding_4	CBI56939.1	508	FAD_binding_4	Sordaria macrospora k-hell	AA7	NO	NO
comp8611_c0_seq1 len=4293 path=[4331:0-649 5041:650-736 5128:737-4292]	4293	BBE	AGC61305.1	493	FAD_binding_4	Mycobacterium liflandii 128FXT	AA7	NO	NO
comp2911_c0_seq1 len=1709 path=[1687:0-1708]	1709	FAD_binding_4	AGG60232.1	464	FAD_binding_4|BBE	Bacillus subtilis subsp. subtilis 6051-HGW	AA7	NO	NO
comp2911_c0_seq1 len=1709 path=[1687:0-1708]	1709	FAD_binding_4	AFQ56798.1	464	FAD_binding_4|BBE	Bacillus subtilis QB928	AA7	NO	NO
comp2911_c0_seq1 len=1709 path=[1687:0-1708]	1709	FAD_binding_4	BAM49801.1	464	FAD_binding_4|BBE	Bacillus subtilis BEST7613	AA7	NO	NO
comp2911_c0_seq1 len=1709 path=[1687:0-1708]	1709	FAD_binding_4	BAM57070.1	464	FAD_binding_4|BBE	Bacillus subtilis BEST7003	AA7	NO	NO
comp9567_c0_seq4 len=1696 path=[1:0-266 9397:267-346 268:347-770 9692:771-843 692:844-1664 10074:1665-1666 1515:1667-1695]	1696	n/a	AFT99467.1	495	FAD_binding_4	Nocardia brasiliensis ATCC 700358 HUJEG-1	AA7	n/a	NO
comp8170_c1_seq2 len=1230 path=[1:0-1165 6486:1166-1229]	1230	BBE	CCA70426.1	533	FAD_binding_4	Piriformospora indica	AA7	NO	NO
comp4881_c0_seq1 len=1186 path=[1165:0-822 1989:823-1185]	1186	n/a	AFY75432.1	473	FAD_binding_4|BBE	Synechococcus sp. PCC 7502	AA7	n/a	NO
comp10089_c0_seq1 len=2839 path=[1:0-2838]	2839	BBE|FAD_binding_4	CCK29139.1	530	FAD_binding_4	Streptomyces davawensis JCM 4913	AA7	NO	NO
comp5289_c0_seq1 len=562 path=[540:0-162 703:163-561]	562	FAD_binding_4	BAM73633.1	471	FAD_binding_4	Streptomyces sp. WK-5344	AA7	YES	YES
comp8458_c0_seq2 len=1592 path=[3858:0-1530 5389:1531-1568 7943:1569-1591]	1592	FAD_binding_4	AGB22215.1	490	FAD_binding_4	Mycobacterium smegmatis JS623	AA7	YES	NO
comp8170_c0_seq1 len=1505 path=[3119:0-1262 4452:1263-1504]	1505	n/a	CCA70426.1	533	FAD_binding_4	Piriformospora indica	AA7	n/a	NO
comp266919_c0_seq1 len=554 path=[532:0-553]	554	FAD_binding_4|ALO	AGC61305.1	493	FAD_binding_4	Mycobacterium liflandii 128FXT	AA7	NO	YES
comp3043_c0_seq1 len=1360 path=[2725:0-1283 5472:1284-1359]	1360	BBE	AGF65600.1	474	FAD_binding_4|BBE	Streptomyces hygroscopicus subsp. jinggangensis TL01	AA7	NO	NO
comp6953_c0_seq1 len=545 path=[1:0-314 316:315-428 430:429-544]	545	FAD_binding_4	AGL38640.1	491	FAD_binding_4	Mycobacterium avium subsp. paratuberculosis MAP4	AA7	YES	YES
comp8170_c1_seq3 len=1591 path=[1:0-1165 1167:1166-1499 1501:1500-1590]	1591	BBE|FAD_binding_4	CCA70426.1	533	FAD_binding_4	Piriformospora indica	AA7	NO	NO
comp9567_c0_seq10 len=1616 path=[1:0-266 268:267-690 9692:691-763 692:764-1584 10074:1585-1586 1515:1587-1615]	1616	n/a	AFT99467.1	495	FAD_binding_4	Nocardia brasiliensis ATCC 700358 HUJEG-1	AA7	n/a	NO
comp8458_c0_seq1 len=3880 path=[3858:0-1530 5389:1531-1568 5427:1569-3149 7008:3150-3163 7022:3164-3879]	3880	FAD_binding_4	AGB22215.1	490	FAD_binding_4	Mycobacterium smegmatis JS623	AA7	YES	NO
comp8170_c0_seq2 len=1575 path=[3119:0-1262 4382:1263-1332 4452:1333-1574]	1575	n/a	CCA70426.1	533	FAD_binding_4	Piriformospora indica	AA7	n/a	NO
comp4116_c0_seq1 len=1072 path=[1:0-394 396:395-1071]	1072	FAD_binding_4	AFT99467.1	495	FAD_binding_4	Nocardia brasiliensis ATCC 700358 HUJEG-1	AA7	YES	NO
comp7179_c0_seq2 len=2617 path=[1:0-1423 1425:1424-2319 2321:2320-2616]	2617	FAD_binding_4	CCB72173.1	525	FAD_binding_4	Streptomyces cattleya NRRL 8057	AA7	YES	NO
comp261272_c0_seq1 len=504 path=[482:0-503]	504	FAD_binding_4	CCK28668.1	469	FAD_binding_4	Streptomyces davawensis JCM 4913	AA7	YES	YES
comp59623_c0_seq1 len=1302 path=[1:0-1301]	1302	n/a	CCK28668.1	469	FAD_binding_4	Streptomyces davawensis JCM 4913	AA7	n/a	NO
comp20547_c0_seq1 len=2230 path=[1:0-2229]	2230	FAD_binding_4|BBE	AGF65600.1	474	FAD_binding_4|BBE	Streptomyces hygroscopicus subsp. jinggangensis TL01	AA7	YES	NO
comp7318_c0_seq1 len=1021 path=[2264:0-399 2759:400-826 3186:827-850 6694:851-1020]	1021	FAD_binding_4	AGB22215.1	490	FAD_binding_4	Mycobacterium smegmatis JS623	AA7	YES	NO
comp6866_c0_seq2 len=2405 path=[1:0-1562 1564:1563-1585 1587:1586-2404]	2405	FAD_binding_4	AFM26333.1	472	FAD_binding_4	Desulfomonile tiedjei DSM 6799	AA7	YES	NO
comp9567_c0_seq2 len=1623 path=[1:0-266 9397:267-346 268:347-770 692:771-1591 10074:1592-1593 1515:1594-1622]	1623	FAD_binding_4	AFT99467.1	495	FAD_binding_4	Nocardia brasiliensis ATCC 700358 HUJEG-1	AA7	YES	NO
comp16140_c0_seq1 len=1455 path=[1433:0-1454]	1455	FAD_binding_4	CCK28668.1	469	FAD_binding_4	Streptomyces davawensis JCM 4913	AA7	YES	NO
comp12845_c0_seq1 len=2252 path=[2230:0-2251]	2252	FAD_binding_4	AFT88228.1	475	FAD_binding_4|BBE	Burkholderia phenoliruptrix BR3459a	AA7	NO	NO
comp6866_c0_seq1 len=2480 path=[1:0-1562 4911:1563-1660 1587:1661-2479]	2480	FAD_binding_4	AFM26333.1	472	FAD_binding_4	Desulfomonile tiedjei DSM 6799	AA7	YES	NO
comp6639_c0_seq1 len=2382 path=[2360:0-2381]	2382	BBE|FAD_binding_4	CBI58520.1	515	FAD_binding_4	Sordaria macrospora k-hell	AA7	NO	NO
comp5710_c0_seq2 len=3947 path=[3925:0-808 4734:809-948 4874:949-3946]	3947	FAD_binding_4|HET	AFY75432.1	473	FAD_binding_4|BBE	Synechococcus sp. PCC 7502	AA7	NO	NO
comp335_c0_seq1 len=386 path=[1:0-385]	386	n/a	AFM26333.1	472	FAD_binding_4	Desulfomonile tiedjei DSM 6799	AA7	n/a	YES
comp9279_c1_seq1 len=775 path=[1:0-639 641:640-752 4582:753-774]	775	n/a	CBI50836.1	NA	n/a	Sordaria macrospora k-hell	AA8	n/a	n/a
comp253919_c0_seq1 len=228 path=[206:0-227]	228	n/a	CAP61759.1	NA	n/a	Podospora anserina S mat+	AA8	n/a	n/a
comp9279_c1_seq2 len=1566 path=[1:0-639 641:640-752 754:753-1565]	1566	n/a	CBI50836.1	NA	n/a	Sordaria macrospora k-hell	AA8	n/a	n/a
comp9279_c1_seq2 len=1566 path=[1:0-639 641:640-752 754:753-1565]	1566	n/a	CAP61759.1	NA	n/a	Podospora anserina S mat+	AA8	n/a	n/a
comp4857_c0_seq1 len=1062 path=[1:0-764 766:765-1061]	1062	Glyco_hydro_61	ACR92640.1	243	Glyco_hydro_61	Trichoderma reesei QM6A	AA9	YES	NO		Q7Z9M7
comp2912_c0_seq1 len=1919 path=[1897:0-1918]	1919	Glyco_hydro_61	XP_383871.1	257	Glyco_hydro_61	Fusarium graminearum PH-1	AA9	YES	NO
comp286858_c0_seq1 len=395 path=[1:0-394]	395	Glyco_hydro_61	CAP65111.1	254	Glyco_hydro_61	Podospora anserina S mat+	AA9	YES	NO		B2AMI8
comp9802_c0_seq1 len=2061 path=[1:0-2060]	2061	n/a	CAP61650.1	236	Glyco_hydro_61	Podospora anserina S mat+	AA9	n/a	NO		B2ADY5
comp187_c0_seq1 len=237 path=[1:0-236]	237	Glyco_hydro_61	AEO56547.1	258	Glyco_hydro_61	Myceliophthora thermophila ATCC 42464	AA9	YES	YES
comp116826_c0_seq1 len=755 path=[733:0-754]	755	Glyco_hydro_61|CBM_1	CAP67466.1	247	Glyco_hydro_61	Podospora anserina S mat+	AA9	NO	NO		B2ASU3
comp37661_c0_seq1 len=632 path=[1:0-631]	632	n/a	AEO56016.1	259	Glyco_hydro_61	Myceliophthora thermophila ATCC 42464	AA9	n/a	NO
comp12214_c0_seq1 len=1575 path=[1:0-1565 1567:1566-1574]	1575	Glyco_hydro_61	CAP66744.1	358	Glyco_hydro_61	Podospora anserina S mat+	AA9	YES	NO		B2ARG6
comp9_c0_seq1 len=290 path=[587:0-46 367:47-70 391:71-289]	290	Glyco_hydro_61	CAG27576.1	246	Glyco_hydro_61	Thielavia terrestris	AA9	YES	YES
comp9_c0_seq1 len=290 path=[587:0-46 367:47-70 391:71-289]	290	Glyco_hydro_61	AEO67662.1	246	Glyco_hydro_61	Thielavia terrestris NRRL 8126	AA9	YES	YES
comp9_c0_seq1 len=290 path=[587:0-46 367:47-70 391:71-289]	290	Glyco_hydro_61	AEO60271.1	245	Glyco_hydro_61	Myceliophthora thermophila ATCC 42464	AA9	YES	YES
comp5356_c0_seq1 len=3392 path=[1:0-3391]	3392	n/a	BAE64395.1	408	Glyco_hydro_61	Aspergillus oryzae RIB40	AA9	n/a	NO		Q2U220
comp89243_c0_seq1 len=828 path=[806:0-827]	828	Glyco_hydro_61	CAQ16217.1	307	Glyco_hydro_61	Glomerella graminicola M2	AA9	YES	NO		B5WY77
comp509032_c0_seq1 len=276 path=[1:0-275]	276	Glyco_hydro_61	CAG27576.1	246	Glyco_hydro_61	Thielavia terrestris	AA9	YES	YES
comp509032_c0_seq1 len=276 path=[1:0-275]	276	Glyco_hydro_61	AEO67662.1	246	Glyco_hydro_61	Thielavia terrestris NRRL 8126	AA9	YES	YES
comp8695_c0_seq1 len=8070 path=[8048:0-8069]	8070	Glyco_hydro_61|FAD_binding_7|DNA_photolyase	CAF05857.1	306	Glyco_hydro_61	Neurospora crassa OR74A	AA9	NO	NO		Q7S411
comp11581_c0_seq1 len=4148 path=[4126:0-4147]	4148	Glyco_hydro_61|HET	AFO72233.1	257	Glyco_hydro_61	Heterobasidion parviporum	AA9	NO	NO
comp503698_c0_seq1 len=219 path=[197:0-218]	219	n/a	AEO65580.1	252	Glyco_hydro_61	Thielavia terrestris NRRL 8126	AA9	n/a	YES
comp503698_c0_seq1 len=219 path=[197:0-218]	219	n/a	ACE10232.1	491	Glyco_hydro_61|Glyco_hydro_61	Thielavia terrestris NRRL 8126	AA9	n/a	NO
comp5975_c0_seq1 len=4391 path=[4301:0-867 8624:868-935 5169:936-4390]	4391	Chal_sti_synt_N|Chal_sti_synt_C|Glyco_hydro_61	AEO56016.1	259	Glyco_hydro_61	Myceliophthora thermophila ATCC 42464	AA9	NO	NO
comp3061_c0_seq1 len=1243 path=[1:0-1215 1217:1216-1240 1242:1241-1242]	1243	Glyco_hydro_61	XP_359989.1	337	Glyco_hydro_61	Magnaporthe grisea 70-15	AA9	YES	NO
comp38633_c0_seq1 len=1330 path=[1:0-1329]	1330	Glyco_hydro_61	AEO56016.1	259	Glyco_hydro_61	Myceliophthora thermophila ATCC 42464	AA9	YES	NO
comp2068_c0_seq1 len=2290 path=[1:0-470 472:471-2289]	2290	Glyco_hydro_61	AEO64177.1	381	Glyco_hydro_61	Thielavia terrestris NRRL 8126	AA9	YES	NO
comp88992_c0_seq1 len=400 path=[378:0-399]	400	n/a	CAQ16217.1	307	Glyco_hydro_61	Glomerella graminicola M2	AA9	n/a	NO		B5WY77
comp9507_c0_seq6 len=4411 path=[4335:0-1294 5630:1295-1318 12752:1319-4410]	4411	Glyco_hydro_61	XP_362794.1	243	Glyco_hydro_61	Magnaporthe grisea 70-15	AA9	YES	NO		G4MXC7
comp337855_c0_seq1 len=228 path=[1:0-227]	228	n/a	CAP65855.1	250	Glyco_hydro_61	Podospora anserina S mat+	AA9	n/a	YES		B2APD8
comp167341_c0_seq1 len=699 path=[677:0-698]	699	n/a	XP_364487.1	263	Glyco_hydro_61	Magnaporthe grisea 70-15	AA9	n/a	NO		G4NHT8
comp133832_c0_seq1 len=236 path=[1:0-235]	236	n/a	XP_364487.1	263	Glyco_hydro_61	Magnaporthe grisea 70-15	AA9	n/a	YES		G4NHT8
comp114715_c0_seq1 len=585 path=[1:0-584]	585	Glyco_hydro_61	CAP67466.1	247	Glyco_hydro_61	Podospora anserina S mat+	AA9	YES	NO		B2ASU3
comp377421_c0_seq1 len=454 path=[432:0-453]	454	Glyco_hydro_61	AEO65580.1	252	Glyco_hydro_61	Thielavia terrestris NRRL 8126	AA9	YES	NO
comp377421_c0_seq1 len=454 path=[432:0-453]	454	Glyco_hydro_61	CCA94930.1	251	Glyco_hydro_61	uncultured eukaryote	AA9	YES	NO
comp5630_c0_seq1 len=2772 path=[2750:0-2453 5204:2454-2771]	2772	Glyco_hydro_61	AEO60271.1	245	Glyco_hydro_61	Myceliophthora thermophila ATCC 42464	AA9	YES	NO
comp3061_c0_seq2 len=1647 path=[1:0-1215 1217:1216-1240 2534:1241-1646]	1647	Glyco_hydro_61|CBM_1	XP_359989.1	337	Glyco_hydro_61	Magnaporthe grisea 70-15	AA9	NO	NO
comp9000_c1_seq1 len=1647 path=[1:0-1646]	1647	CBM_1|Glyco_hydro_61	ACR92640.1	243	Glyco_hydro_61	Trichoderma reesei QM6A	AA9	NO	NO		Q7Z9M7
comp11867_c0_seq1 len=1495 path=[1473:0-1494]	1495	Glyco_hydro_61	CAP64865.1	268	Glyco_hydro_61	Podospora anserina S mat+	AA9	YES	NO		B2ALM7
comp5975_c0_seq2 len=4323 path=[4301:0-867 5169:868-4322]	4323	Chal_sti_synt_N|Chal_sti_synt_C|Glyco_hydro_61	AEO56016.1	259	Glyco_hydro_61	Myceliophthora thermophila ATCC 42464	AA9	NO	NO
comp53538_c0_seq1 len=1033 path=[1011:0-1032]	1033	Glyco_hydro_61|CBM_1	CCA67659.1	345	Glyco_hydro_61	Piriformospora indica	AA9|CBM1	NO	NO
comp2190_c0_seq2 len=2132 path=[2133:0-403 2537:404-476 2610:477-2123 4257:2124-2131]	2132	Glyco_hydro_61|Glyco_hydro_61	AEO58169.1	336	Glyco_hydro_61	Myceliophthora thermophila ATCC 42464	AA9|CBM1	NO	NO
comp3380_c0_seq1 len=1276 path=[1254:0-802 2057:803-1275]	1276	Glyco_hydro_61	AEO54509.1	316	Glyco_hydro_61	Myceliophthora thermophila ATCC 42464	AA9|CBM1	YES	NO
comp7804_c0_seq1 len=4102 path=[1:0-4101]	4102	Chitin_bind_3|CBM_1	CAG27577.1	332	Glyco_hydro_61	Humicola insolens	AA9|CBM1	NO	NO
comp2190_c0_seq1 len=2059 path=[2133:0-403 2610:404-2050 4257:2051-2058]	2059	Glyco_hydro_61	AEO58169.1	336	Glyco_hydro_61	Myceliophthora thermophila ATCC 42464	AA9|CBM1	YES	NO
comp24689_c0_seq1 len=1152 path=[1130:0-1151]	1152	CBM_1|Glyco_hydro_61	AEO68023.1	330	Glyco_hydro_61	Thielavia terrestris NRRL 8126	AA9|CBM1	NO	NO
comp9124_c0_seq3 len=3585 path=[3563:0-1033 4597:1034-1101 4665:1102-2439 6003:2440-2494 6058:2495-2716 6280:2717-3584]	3585	Glyco_hydro_61|Glyco_hydro_61	XP_369395.1	617	Glyco_hydro_61	Magnaporthe grisea 70-15	AA9|CBM18	NO	NO		G4N560
comp9124_c0_seq4 len=3462 path=[3563:0-1033 4665:1034-2371 6058:2372-2593 6280:2594-3461]	3462	Glyco_hydro_61	XP_369395.1	617	Glyco_hydro_61	Magnaporthe grisea 70-15	AA9|CBM18	YES	NO		G4N560
comp9124_c0_seq1 len=3530 path=[3563:0-1033 4597:1034-1101 4665:1102-2439 6058:2440-2661 6280:2662-3529]	3530	Glyco_hydro_61|Glyco_hydro_61	XP_369395.1	617	Glyco_hydro_61	Magnaporthe grisea 70-15	AA9|CBM18	NO	NO		G4N560
comp9124_c0_seq2 len=3517 path=[3563:0-1033 4665:1034-2371 6003:2372-2426 6058:2427-2648 6280:2649-3516]	3517	Glyco_hydro_61	XP_369395.1	617	Glyco_hydro_61	Magnaporthe grisea 70-15	AA9|CBM18	YES	NO		G4N560
SequenceID	Query-Length	Query-Pfam domains	Subject gi	Subject-Length	Subject-Pfam domains	Organism	CAZy Families	Domain Consistant	Length Consistant	Subject EC	Subject GenBankID
comp4767_c0_seq1 len=863 path=[1:0-344 346:345-492 494:493-862]	863	DUF1996|DUF1996|DUF1996	AEO58207.1	439	DUF1996	Myceliophthora thermophila ATCC 42464	CBM1	NO	NO
comp257084_c0_seq1 len=579 path=[1:0-578]	579	DUF1996	AEO58207.1	439	DUF1996	Myceliophthora thermophila ATCC 42464	CBM1	YES	NO
comp5826_c0_seq2 len=7589 path=[1:0-2461 2463:2462-3722 3859:3723-7588]	7589	RhoGEF|CDC24	CCA68016.1	NA	n/a	Piriformospora indica	CBM1	n/a	n/a
comp17883_c0_seq1 len=2536 path=[1:0-2535]	2536	DUF1996	AEO58207.1	439	DUF1996	Myceliophthora thermophila ATCC 42464	CBM1	YES	NO
comp388705_c0_seq1 len=242 path=[1:0-241]	242	DUF1996	AEO58207.1	439	DUF1996	Myceliophthora thermophila ATCC 42464	CBM1	YES	NO
comp266980_c0_seq1 len=218 path=[231:0-217]	218	DUF1996	AEO58207.1	439	DUF1996	Myceliophthora thermophila ATCC 42464	CBM1	YES	NO
comp5826_c0_seq1 len=7724 path=[1:0-2461 2463:2462-3722 3724:3723-3857 3859:3858-7723]	7724	RhoGEF|CDC24	CCA68016.1	NA	n/a	Piriformospora indica	CBM1	n/a	n/a
comp2682_c0_seq1 len=4434 path=[4412:0-4433]	4434	Pet127	CAY68599.1	1429	Flo11	Pichia pastoris GS115	CBM1	NO	NO		C4QZC5
comp2682_c0_seq1 len=4434 path=[4412:0-4433]	4434	Pet127	CCA37660.1	1631	Flo11	Pichia pastoris CBS 7435	CBM1	NO	NO
comp42416_c0_seq1 len=2087 path=[1:0-2086]	2087	DUF1996	AEO58207.1	439	DUF1996	Myceliophthora thermophila ATCC 42464	CBM1	YES	NO
comp9810_c0_seq1 len=2500 path=[2513:0-2499]	2500	DUF1996	AEO58207.1	439	DUF1996	Myceliophthora thermophila ATCC 42464	CBM1	YES	NO
comp5132_c0_seq1 len=9123 path=[1:0-9122]	9123	n/a	CCA37660.1	1631	Flo11	Pichia pastoris CBS 7435	CBM1	n/a	NO
comp267763_c0_seq1 len=363 path=[341:0-362]	363	n/a	CCA73934.1	NA	n/a	Piriformospora indica	CBM1	n/a	n/a
comp6347_c0_seq1 len=1362 path=[1340:0-1361]	1362	n/a	AEO67939.1	NA	n/a	Thielavia terrestris NRRL 8126	CBM1	n/a	n/a
comp9698_c0_seq2 len=2009 path=[8228:0-1954 966:1955-2008]	2009	n/a	CCA37660.1	1631	Flo11	Pichia pastoris CBS 7435	CBM1	n/a	YES
comp11231_c0_seq1 len=11738 path=[1:0-11737]	11738	ABC_membrane|ABC_tran|ABC_membrane|ABC_tran|DUF1996|Frag1	AEO58207.1	439	DUF1996	Myceliophthora thermophila ATCC 42464	CBM1	NO	NO
comp5768_c0_seq1 len=2949 path=[1:0-718 720:719-2346 2348:2347-2948]	2949	DUF1996	AEO58207.1	439	DUF1996	Myceliophthora thermophila ATCC 42464	CBM1	YES	NO
comp350268_c0_seq1 len=201 path=[1:0-200]	201	DUF1996	AEO58207.1	439	DUF1996	Myceliophthora thermophila ATCC 42464	CBM1	YES	NO
comp8249_c0_seq1 len=3606 path=[3584:0-613 4198:614-1595 5180:1596-1876 5461:1877-3605]	3606	DUF390	CCA37660.1	1631	Flo11	Pichia pastoris CBS 7435	CBM1	NO	NO
comp6915_c0_seq2 len=321 path=[238:0-94 333:95-127 498:128-320]	321	DUF1996	AEO58207.1	439	DUF1996	Myceliophthora thermophila ATCC 42464	CBM1	YES	NO
comp9026_c0_seq6 len=2316 path=[2864:0-1350 6055:1351-1416 4215:1417-1736 4535:1737-2152 4951:2153-2237 6278:2238-2245 6286:2246-2249 5048:2250-2315]	2316	SGL	ACR14707.1	1862	SGL|GSDH|CBM_2|PSD4|PSCyt3	Teredinibacter turnerae T7901	CBM10|CBM2	NO	YES		C5BSV8
comp9026_c0_seq1 len=2165 path=[2864:0-1350 4215:1351-1670 4535:1671-2086 6278:2087-2094 6286:2095-2098 5048:2099-2164]	2165	SGL	ACR14707.1	1862	SGL|GSDH|CBM_2|PSD4|PSCyt3	Teredinibacter turnerae T7901	CBM10|CBM2	NO	YES		C5BSV8
comp3371_c0_seq1 len=1771 path=[1749:0-927 2677:928-1770]	1771	SGL	ACR14707.1	1862	SGL|GSDH|CBM_2|PSD4|PSCyt3	Teredinibacter turnerae T7901	CBM10|CBM2	NO	YES		C5BSV8
comp9026_c0_seq8 len=2250 path=[2864:0-1350 4215:1351-1670 4535:1671-2086 4951:2087-2171 6278:2172-2179 6286:2180-2183 5048:2184-2249]	2250	SGL	ACR14707.1	1862	SGL|GSDH|CBM_2|PSD4|PSCyt3	Teredinibacter turnerae T7901	CBM10|CBM2	NO	YES		C5BSV8
comp9026_c0_seq2 len=2228 path=[2864:0-1350 4215:1351-1670 5882:1671-1733 4535:1734-2149 6278:2150-2157 6286:2158-2161 5048:2162-2227]	2228	SGL	ACR14707.1	1862	SGL|GSDH|CBM_2|PSD4|PSCyt3	Teredinibacter turnerae T7901	CBM10|CBM2	NO	YES		C5BSV8
comp9026_c0_seq9 len=2231 path=[2864:0-1350 6055:1351-1416 4215:1417-1736 4535:1737-2152 6278:2153-2160 6286:2161-2164 5048:2165-2230]	2231	SGL	ACR14707.1	1862	SGL|GSDH|CBM_2|PSD4|PSCyt3	Teredinibacter turnerae T7901	CBM10|CBM2	NO	YES		C5BSV8
comp9026_c0_seq4 len=2313 path=[2864:0-1350 4215:1351-1670 5882:1671-1733 4535:1734-2149 4951:2150-2234 6278:2235-2242 6286:2243-2246 5048:2247-2312]	2313	SGL	ACR14707.1	1862	SGL|GSDH|CBM_2|PSD4|PSCyt3	Teredinibacter turnerae T7901	CBM10|CBM2	NO	YES		C5BSV8
comp10725_c0_seq1 len=1801 path=[1:0-1800]	1801	Peptidase_M28|PA	NP_733527.1	1080	Peptidase_M4_C|Peptidase_M28	Streptomyces coelicolor A3(2)	CBM12	NO	NO		Q8CK35
comp3098_c0_seq1 len=5580 path=[1:0-2105 2107:2106-5579]	5580	Dioxygenase_C|Dioxygenase_N	CCK28105.1	284	Dioxygenase_C	Streptomyces davawensis JCM 4913	CBM12	NO	NO
comp6722_c0_seq3 len=2182 path=[1:0-1505 1507:1506-1640 4439:1641-1653 1655:1654-1711 1713:1712-2181]	2182	Peptidase_S8	ACX42259.1	591	Peptidase_S8	Paenibacillus dendritiformis T451	CBM12	YES	NO		D0EVD2
comp9088_c0_seq3 len=4192 path=[1:0-335 337:336-712 714:713-778 780:779-1099 1101:1100-1251 1253:1252-3730 8321:3731-3749 3732:3750-4191]	4192	Peptidase_S8	ACX42259.1	591	Peptidase_S8	Paenibacillus dendritiformis T451	CBM12	YES	NO		D0EVD2
comp9088_c0_seq2 len=4126 path=[1:0-335 337:336-712 780:713-1033 1101:1034-1185 1253:1186-3664 8321:3665-3683 3732:3684-4125]	4126	Peptidase_S8	ACX42259.1	591	Peptidase_S8	Paenibacillus dendritiformis T451	CBM12	YES	NO		D0EVD2
comp7472_c0_seq2 len=1529 path=[2225:0-1504 4539:1505-1505 4540:1506-1528]	1529	n/a	AEN10748.1	304	Dioxygenase_C	Streptomyces sp. SirexAA-E	CBM12	n/a	NO
comp7727_c0_seq1 len=15943 path=[15921:0-11448 27370:11449-15942]	15943	DUF2457|DUF2457|Arf|DUF3336|Patatin|Dioxygenase_N|Dioxygenase_C|Fungal_trans|Zn_clus	BAG20890.1	300	Dioxygenase_C	Streptomyces griseus subsp. griseus NBRC 13350	CBM12	NO	NO		B1VSD6
comp7270_c0_seq1 len=5136 path=[1:0-1007 10207:1008-1069 1009:1070-1929 1869:1930-5135]	5136	Peptidase_S8|Peptidase_S8|DUF1034	ACX42259.1	591	Peptidase_S8	Paenibacillus dendritiformis T451	CBM12	NO	NO		D0EVD2
comp11030_c0_seq1 len=8418 path=[8396:0-8417]	8418	Peptidase_M28	ACZ86812.1	1090	Peptidase_M4_C|Peptidase_M28	Streptosporangium roseum DSM 43021	CBM12	NO	NO		D2AUV0
comp9088_c0_seq1 len=4173 path=[1:0-335 337:336-712 714:713-778 780:779-1099 1101:1100-1251 1253:1252-3730 3732:3731-4172]	4173	Peptidase_S8	ACX42259.1	591	Peptidase_S8	Paenibacillus dendritiformis T451	CBM12	YES	NO		D0EVD2
comp3186_c0_seq1 len=1579 path=[1557:0-1578]	1579	Peptidase_M28	ACZ86812.1	1090	Peptidase_M4_C|Peptidase_M28	Streptosporangium roseum DSM 43021	CBM12	NO	NO		D2AUV0
comp101890_c0_seq1 len=1002 path=[980:0-1001]	1002	n/a	ABX04833.1	NA	n/a	Herpetosiphon aurantiacus ATCC 23779	CBM12	n/a	n/a		A9AX25
comp6357_c0_seq1 len=1809 path=[1787:0-587 2375:588-1808]	1809	Peptidase_M28|PA	ACZ86812.1	1090	Peptidase_M4_C|Peptidase_M28	Streptosporangium roseum DSM 43021	CBM12	NO	NO		D2AUV0
comp6722_c0_seq1 len=2111 path=[1:0-1505 1507:1506-1640 1713:1641-2110]	2111	Peptidase_S8	ACX42259.1	591	Peptidase_S8	Paenibacillus dendritiformis T451	CBM12	YES	NO		D0EVD2
comp6722_c0_seq2 len=1658 path=[1:0-1505 1507:1506-1640 4439:1641-1653 4413:1654-1657]	1658	Peptidase_S8	ACX42259.1	591	Peptidase_S8	Paenibacillus dendritiformis T451	CBM12	YES	NO		D0EVD2
comp20012_c0_seq1 len=1817 path=[1:0-1816]	1817	Peptidase_M28	NP_733527.1	1080	Peptidase_M4_C|Peptidase_M28	Streptomyces coelicolor A3(2)	CBM12	NO	NO		Q8CK35
comp6706_c0_seq1 len=1866 path=[1:0-763 765:764-1865]	1866	Dioxygenase_C	NP_628030.1	308	Dioxygenase_C	Streptomyces coelicolor A3(2)	CBM12	YES	NO		Q9XA22
comp7727_c0_seq2 len=4673 path=[31935:0-178 27370:179-4672]	4673	Dioxygenase_C|Fungal_trans|Zn_clus	BAG20890.1	300	Dioxygenase_C	Streptomyces griseus subsp. griseus NBRC 13350	CBM12	NO	NO		B1VSD6
comp9088_c0_seq4 len=4107 path=[1:0-335 337:336-712 780:713-1033 1101:1034-1185 1253:1186-3664 3732:3665-4106]	4107	Peptidase_S8	ACX42259.1	591	Peptidase_S8	Paenibacillus dendritiformis T451	CBM12	YES	NO		D0EVD2
comp6357_c0_seq2 len=1822 path=[1787:0-587 4654:588-600 2375:601-1821]	1822	Peptidase_M28|PA	NP_733527.1	1080	Peptidase_M4_C|Peptidase_M28	Streptomyces coelicolor A3(2)	CBM12	NO	NO		Q8CK35
comp7217_c0_seq2 len=4128 path=[1:0-3541 8159:3542-3633 8511:3634-3636 3546:3637-4127]	4128	n/a	ACL76858.1	425	RicinB_lectin_2	Clostridium cellulolyticum H10 ATCC 35319	CBM13	n/a	NO		B8I693
comp3155_c0_seq1 len=3091 path=[1:0-3090]	3091	Pkinase_Tyr|Pkinase	CAJ63931.1	634	Pkinase	Frankia alni ACN14a	CBM13	NO	NO		Q0RF20
comp5236_c0_seq2 len=1984 path=[2179:0-1842 4239:1843-1983]	1984	n/a	CAL79964.1	583	Ricin_B_lectin	Bradyrhizobium sp. ORS278	CBM13	n/a	NO		A4Z1D8
comp847_c0_seq1 len=342 path=[1:0-341]	342	n/a	CBG74908.1	804	Ricin_B_lectin	Streptomyces scabiei 87.22	CBM13	n/a	NO		C9ZEB7
comp2017_c0_seq1 len=2706 path=[2684:0-2001 4686:2002-2705]	2706	NAD-GH|HSP70	CAJ61616.1	777	HSP70	Frankia alni ACN14a	CBM13	NO	NO		Q0RLI8
comp9899_c0_seq1 len=1440 path=[1:0-1439]	1440	NAD-GH|HSP70	CAJ61616.1	777	HSP70	Frankia alni ACN14a	CBM13	NO	NO		Q0RLI8
comp5544_c0_seq1 len=7178 path=[7156:0-5229 12386:5230-5324 12481:5325-7177]	7178	Peptidase_S8|Flavokinase|DHBP_synthase|Methyltransf_23|Methyltransf_31|Methyltransf_26|Methyltransf_12	ADO75815.1	554	Peptidase_S8|RicinB_lectin_2	Stigmatella aurantiaca DW4/3-1	CBM13	NO	NO		E3FRN8
comp10035_c0_seq1 len=2672 path=[1:0-2671]	2672	Peptidase_S8	ADO75815.1	554	Peptidase_S8|RicinB_lectin_2	Stigmatella aurantiaca DW4/3-1	CBM13	NO	NO		E3FRN8
comp5544_c0_seq2 len=7083 path=[7156:0-5229 12481:5230-7082]	7083	Peptidase_S8|Flavokinase|DHBP_synthase|Methyltransf_23|Methyltransf_31|Methyltransf_26|Methyltransf_12	ADO75815.1	554	Peptidase_S8|RicinB_lectin_2	Stigmatella aurantiaca DW4/3-1	CBM13	NO	NO		E3FRN8
comp3550_c0_seq1 len=989 path=[967:0-988]	989	n/a	CBG74908.1	804	Ricin_B_lectin	Streptomyces scabiei 87.22	CBM13	n/a	YES		C9ZEB7
comp2110_c0_seq1 len=3329 path=[1:0-3328]	3329	NAD-GH|HSP70	CAJ61616.1	777	HSP70	Frankia alni ACN14a	CBM13	NO	NO		Q0RLI8
comp9809_c0_seq1 len=2355 path=[7:0-2354]	2355	NAD-GH|MreB_Mbl|HSP70	CAJ61616.1	777	HSP70	Frankia alni ACN14a	CBM13	NO	NO		Q0RLI8
comp5837_c0_seq1 len=8655 path=[8633:0-3286 11920:3287-5471 14105:5472-8654]	8655	Pkinase_Tyr	AGI90727.1	600	Pkinase	Streptomyces albus J1074	CBM13	NO	NO
comp7217_c0_seq3 len=4115 path=[1:0-3541 8511:3542-3544 8374:3545-3623 3546:3624-4114]	4115	n/a	ACL76858.1	425	RicinB_lectin_2	Clostridium cellulolyticum H10 ATCC 35319	CBM13	n/a	NO		B8I693
comp9918_c0_seq1 len=1830 path=[1856:0-1829]	1830	HSP70|NAD-GH	CAJ61616.1	777	HSP70	Frankia alni ACN14a	CBM13	NO	NO		Q0RLI8
comp9827_c0_seq1 len=2218 path=[1:0-2217]	2218	Peptidase_S8|Inhibitor_I9	ADO75815.1	554	Peptidase_S8|RicinB_lectin_2	Stigmatella aurantiaca DW4/3-1	CBM13	NO	NO		E3FRN8
comp3653_c0_seq2 len=2132 path=[1:0-1304 1306:1305-2131]	2132	Lipase_GDSL_2	CBG67294.1	559	RicinB_lectin_2|Lipase_GDSL_2	Streptomyces scabiei 87.22	CBM13	NO	NO		C9ZBE8
comp9413_c0_seq1 len=7232 path=[6507:0-1878 8386:1879-6122 13276:6123-6825 12630:6826-7231]	7232	Telomere_reg-2|Pkinase_Tyr|Pkinase	NP_628653.1	640	Pkinase	Streptomyces coelicolor A3(2)	CBM13	NO	NO		Q9KYP5
comp12252_c0_seq1 len=3671 path=[3649:0-3670]	3671	DUF1793	ACU75807.1	910	DUF1793|RicinB_lectin_2	Catenulispora acidiphila DSM 44928	CBM13	NO	NO		C7Q3P2
comp103145_c0_seq1 len=731 path=[709:0-730]	731	n/a	ACU73790.1	814	Ricin_B_lectin	Catenulispora acidiphila DSM 44928	CBM13	n/a	YES		C7Q354
comp3653_c0_seq1 len=2196 path=[1:0-1304 4323:1305-1368 1306:1369-2195]	2196	n/a	CBG67294.1	559	RicinB_lectin_2|Lipase_GDSL_2	Streptomyces scabiei 87.22	CBM13	n/a	NO		C9ZBE8
comp12445_c0_seq1 len=1435 path=[1:0-1434]	1435	Lipase_GDSL_2	AEV84211.1	433	Lipase_GDSL_2|Ricin_B_lectin	Actinoplanes sp. SE50/110	CBM13	NO	NO
comp10061_c0_seq1 len=2651 path=[1:0-2650]	2651	HSP70|MreB_Mbl|NAD-GH	CAJ61616.1	777	HSP70	Frankia alni ACN14a	CBM13	NO	NO		Q0RLI8
comp9413_c0_seq2 len=6529 path=[6507:0-1878 8386:1879-6122 12630:6123-6528]	6529	Telomere_reg-2|Pkinase_Tyr|Pkinase	NP_628653.1	640	Pkinase	Streptomyces coelicolor A3(2)	CBM13	NO	NO		Q9KYP5
comp7322_c1_seq1 len=2765 path=[2743:0-2764]	2765	Peptidase_S8|Inhibitor_I9	ADO75815.1	554	Peptidase_S8|RicinB_lectin_2	Stigmatella aurantiaca DW4/3-1	CBM13	NO	NO		E3FRN8
comp4679_c0_seq1 len=6422 path=[1:0-1216 1218:1217-6421]	6422	Lipase_GDSL|Lipase_GDSL_2|BOP1NT	CBG67294.1	559	RicinB_lectin_2|Lipase_GDSL_2	Streptomyces scabiei 87.22	CBM13	NO	NO		C9ZBE8
comp10188_c0_seq1 len=2416 path=[2394:0-2415]	2416	NAD-GH|MreB_Mbl|HSP70	CAJ61616.1	777	HSP70	Frankia alni ACN14a	CBM13	NO	NO		Q0RLI8
comp7217_c0_seq4 len=4036 path=[1:0-3541 8511:3542-3544 3546:3545-4035]	4036	n/a	ACL76858.1	425	RicinB_lectin_2	Clostridium cellulolyticum H10 ATCC 35319	CBM13	n/a	NO		B8I693
comp7653_c0_seq1 len=4639 path=[4617:0-393 5011:394-4638]	4639	Pkinase_Tyr|Pkinase	NP_733639.1	646	Pkinase	Streptomyces coelicolor A3(2)	CBM13	NO	NO		Q8CJT6
comp9413_c0_seq3 len=7473 path=[6507:0-1878 8386:1879-6122 13035:6123-6363 13276:6364-7066 12630:7067-7472]	7473	Telomere_reg-2|Pkinase_Tyr|Pkinase	NP_628653.1	640	Pkinase	Streptomyces coelicolor A3(2)	CBM13	NO	NO		Q9KYP5
comp7217_c0_seq1 len=4207 path=[1:0-3541 8159:3542-3633 8511:3634-3636 8374:3637-3715 3546:3716-4206]	4207	n/a	ACL76858.1	425	RicinB_lectin_2	Clostridium cellulolyticum H10 ATCC 35319	CBM13	n/a	NO		B8I693
comp5837_c0_seq2 len=5569 path=[17544:0-200 11920:201-2385 14105:2386-5568]	5569	Pkinase_Tyr	AGI90727.1	600	Pkinase	Streptomyces albus J1074	CBM13	NO	NO
comp10128_c0_seq1 len=1083 path=[1061:0-1082]	1083	HSP70|NAD-GH	CAJ61616.1	777	HSP70	Frankia alni ACN14a	CBM13	NO	NO		Q0RLI8
comp5236_c0_seq1 len=2201 path=[2179:0-1842 4022:1843-2059 4239:2060-2200]	2201	n/a	CAL79964.1	583	Ricin_B_lectin	Bradyrhizobium sp. ORS278	CBM13	n/a	NO		A4Z1D8
comp10578_c0_seq1 len=3427 path=[1:0-3426]	3427	DUF1793	AFO78627.1	867	DUF1793|RicinB_lectin_2	Amycolatopsis mediterranei S699	CBM13	NO	NO
comp10578_c0_seq1 len=3427 path=[1:0-3426]	3427	DUF1793	ADJ46916.1	867	DUF1793|RicinB_lectin_2	Amycolatopsis mediterranei U32	CBM13	NO	NO		D8I1I5
comp196799_c0_seq1 len=318 path=[1:0-317]	318	n/a	CBG75844.1	1058	RicinB_lectin_2	Streptomyces scabiei 87.22	CBM13	n/a	NO		C9Z7U1
comp11772_c0_seq1 len=1852 path=[1830:0-1851]	1852	PI-PLC-X	CAS92778.1	NA	n/a	Bacillus thuringiensis	CBM13	n/a	n/a
comp12374_c0_seq1 len=2560 path=[2:0-2559]	2560	Pkinase|Pkinase_Tyr	CAJ63931.1	634	Pkinase	Frankia alni ACN14a	CBM13	NO	NO		Q0RF20
comp13557_c0_seq1 len=2654 path=[2632:0-2653]	2654	Pkinase_Tyr|Pkinase	CAJ58949.1	624	Pkinase	Frankia alni ACN14a	CBM13	NO	NO		Q0RTZ6
comp39578_c0_seq1 len=1840 path=[1818:0-1839]	1840	DUF1680	BAL89511.1	790	DUF1680	Actinoplanes missouriensis 431	CBM13	YES	NO
comp160867_c0_seq1 len=737 path=[1:0-736]	737	n/a	ACU62290.1	582	RicinB_lectin_2	Chitinophaga pinensis DSM 2588	CBM13	n/a	NO		C7PN80
comp2770_c0_seq1 len=5227 path=[5205:0-3105 8311:3106-5226]	5227	RWD|Pkinase_Tyr|Pkinase|Pkinase|Pkinase_Tyr|tRNA-synt_His|HGTP_anticodon2	AGI90727.1	600	Pkinase	Streptomyces albus J1074	CBM13	NO	NO
comp9572_c0_seq1 len=2075 path=[4613:0-494 11216:495-495 5110:496-898 5513:899-1354 5969:1355-1390 6005:1391-1724 6339:1725-1802 6417:1803-2074]	2075	n/a	ACY95481.1	NA	n/a	Tribolium castaneum Georgia-1	CBM14	n/a	n/a		D1MAJ0
comp8862_c0_seq2 len=2626 path=[1:0-1025 1027:1026-1252 4144:1253-1395 4416:1396-1504 4525:1505-2625]	2626	Drf_FH1	AGE49160.1	506	Chitin_bind_3|Barwin	Acanthocystis turfacea Chlorella virus Br0604L	CBM14	NO	NO
comp8862_c0_seq1 len=2755 path=[1:0-1025 1027:1026-1252 4144:1253-1395 4287:1396-1524 4416:1525-1633 4525:1634-2754]	2755	Drf_FH1	AGE49160.1	506	Chitin_bind_3|Barwin	Acanthocystis turfacea Chlorella virus Br0604L	CBM14	NO	NO
comp8743_c0_seq1 len=5330 path=[5308:0-1529 6838:1530-1911 7220:1912-2262 7571:2263-5329]	5330	n/a	BAL27684.1	NA	n/a	Solanum lycopersicum	CBM18	n/a	n/a
comp7039_c0_seq1 len=1966 path=[1:0-1762 1798:1763-1965]	1966	n/a	BAI44126.1	731	FAD_binding_4	Magnaporthe oryzae	CBM18	n/a	NO		C9K5U7
comp7039_c0_seq2 len=2062 path=[1:0-1762 1764:1763-1796 3978:1797-1858 1798:1859-2061]	2062	n/a	BAI44126.1	731	FAD_binding_4	Magnaporthe oryzae	CBM18	n/a	NO		C9K5U7
comp357925_c0_seq1 len=227 path=[205:0-226]	227	n/a	BAI44126.1	731	FAD_binding_4	Magnaporthe oryzae	CBM18	n/a	NO		C9K5U7
comp53019_c0_seq1 len=760 path=[738:0-759]	760	Chitin_bind_1	CAP67127.1	NA	n/a	Podospora anserina S mat+	CBM18	n/a	n/a		B2ARV7
comp7039_c0_seq3 len=2000 path=[1:0-1762 1764:1763-1796 1798:1797-1999]	2000	n/a	BAI44126.1	731	FAD_binding_4	Magnaporthe oryzae	CBM18	n/a	NO		C9K5U7
comp12114_c0_seq1 len=3690 path=[3668:0-3689]	3690	Amidohydro_3	BAI44116.1	NA	n/a	Magnaporthe oryzae	CBM18	n/a	n/a		C9K5T7
comp13124_c0_seq1 len=2393 path=[2371:0-2392]	2393	n/a	EAA32694.1	1497	Glyco_hydro_18|Hce2	Neurospora crassa OR74A	CBM18|GH18	n/a	NO		Q7S8L7
comp8874_c0_seq6 len=3788 path=[1:0-3262 3264:3263-3352 3354:3353-3554 3717:3555-3787]	3788	n/a	AEO62990.1	1146	Glyco_hydro_18	Thielavia terrestris NRRL 8126	CBM18|GH18	n/a	NO
comp9943_c0_seq1 len=3645 path=[1:0-3644]	3645	Abhydrolase_6	EAA32694.1	1497	Glyco_hydro_18|Hce2	Neurospora crassa OR74A	CBM18|GH18	NO	NO		Q7S8L7
comp8874_c0_seq3 len=3949 path=[1:0-3262 3264:3263-3352 3354:3353-3554 3556:3555-3650 3652:3651-3654 3656:3655-3715 3717:3716-3948]	3949	n/a	AEO62990.1	1146	Glyco_hydro_18	Thielavia terrestris NRRL 8126	CBM18|GH18	n/a	NO
comp8874_c0_seq2 len=3859 path=[1:0-3262 3354:3263-3464 3556:3465-3560 3652:3561-3564 3656:3565-3625 3717:3626-3858]	3859	n/a	AEO62990.1	1146	Glyco_hydro_18	Thielavia terrestris NRRL 8126	CBM18|GH18	n/a	NO
comp8874_c0_seq1 len=3698 path=[1:0-3262 3354:3263-3464 3717:3465-3697]	3698	n/a	AEO62990.1	1146	Glyco_hydro_18	Thielavia terrestris NRRL 8126	CBM18|GH18	n/a	NO
comp2871_c0_seq2 len=3996 path=[3974:0-1269 5244:1270-1316 5291:1317-3995]	3996	Glyco_hydro_18	CAK47333.1	1126	Glyco_hydro_18	Aspergillus niger CBS 513.88	CBM18|GH18	YES	NO		A2RBJ5
comp8874_c0_seq5 len=3849 path=[1:0-3262 3264:3263-3352 3354:3353-3554 3656:3555-3615 3717:3616-3848]	3849	n/a	AEO62990.1	1146	Glyco_hydro_18	Thielavia terrestris NRRL 8126	CBM18|GH18	n/a	NO
comp2199_c0_seq1 len=2352 path=[1:0-1427 1429:1428-2351]	2352	Glyco_hydro_18	CAK46733.1	1015	Glyco_hydro_18	Aspergillus niger CBS 513.88	CBM18|GH18	YES	NO		A2R4D3
comp2871_c0_seq1 len=3949 path=[3974:0-1269 5291:1270-3948]	3949	Glyco_hydro_18|Glyco_hydro_18	CAK47333.1	1126	Glyco_hydro_18	Aspergillus niger CBS 513.88	CBM18|GH18	NO	NO		A2RBJ5
comp10407_c0_seq1 len=4770 path=[6183:0-7 6198:8-4769]	4770	Glyco_hydro_18|TRAM_LAG1_CLN8|TRAM1	BAI44121.1	441	Glyco_hydro_18	Magnaporthe oryzae	CBM18|GH18	NO	NO		C9K5U2
comp8874_c0_seq4 len=3759 path=[1:0-3262 3354:3263-3464 3656:3465-3525 3717:3526-3758]	3759	n/a	AEO62990.1	1146	Glyco_hydro_18	Thielavia terrestris NRRL 8126	CBM18|GH18	n/a	NO
comp10207_c0_seq1 len=3441 path=[3419:0-3440]	3441	Pkinase|Pkinase_Tyr	AEV81602.1	652	Pkinase	Actinoplanes sp. SE50/110	CBM2	NO	NO
comp4600_c0_seq1 len=1726 path=[1704:0-590 2295:591-1725]	1726	Inhibitor_I9|Peptidase_S8	AEB45483.1	908	Peptidase_S8|CBM_2	Verrucosispora maris AB-18-032	CBM2	NO	NO
comp2564_c0_seq1 len=7685 path=[7663:0-2447 10111:2448-2657 10321:2658-7684]	7685	PIG-F|GDPD|Fungal_trans|Zn_clus	BAN02470.1	587	GDPD|CBM_2	Acidimicrobidae bacterium YM16-304	CBM2	NO	NO
comp9273_c0_seq8 len=1924 path=[9606:0-160 7324:161-658 7822:659-928 8173:929-1012 8257:1013-1470 8715:1471-1523 8768:1524-1923]	1924	Peptidase_S8	AEB45483.1	908	Peptidase_S8|CBM_2	Verrucosispora maris AB-18-032	CBM2	NO	NO
comp12098_c0_seq1 len=2876 path=[2854:0-2875]	2876	Peptidase_S8|Inhibitor_I9	AEB45483.1	908	Peptidase_S8|CBM_2	Verrucosispora maris AB-18-032	CBM2	NO	NO
comp585368_c0_seq1 len=298 path=[1:0-297]	298	Peptidase_S8	AEB45483.1	908	Peptidase_S8|CBM_2	Verrucosispora maris AB-18-032	CBM2	NO	NO
comp9273_c0_seq12 len=1952 path=[9606:0-160 7324:161-658 7822:659-928 8092:929-998 8162:999-1009 8173:1010-1093 8257:1094-1551 8768:1552-1951]	1952	Peptidase_S8	AEB45483.1	908	Peptidase_S8|CBM_2	Verrucosispora maris AB-18-032	CBM2	NO	NO
comp37769_c0_seq1 len=1424 path=[1402:0-1423]	1424	Peptidase_S8|Inhibitor_I9	AEB45483.1	908	Peptidase_S8|CBM_2	Verrucosispora maris AB-18-032	CBM2	NO	NO
comp4265_c0_seq1 len=4750 path=[4054:0-4749]	4750	Pkinase|Pkinase_Tyr	AEK41741.1	477	Pkinase|CBM_2	Amycolatopsis mediterranei S699	CBM2	NO	NO
comp4265_c0_seq1 len=4750 path=[4054:0-4749]	4750	Pkinase|Pkinase_Tyr	AFO76701.1	476	Pkinase|CBM_2	Amycolatopsis mediterranei S699	CBM2	NO	NO
comp4265_c0_seq1 len=4750 path=[4054:0-4749]	4750	Pkinase|Pkinase_Tyr	ADJ44990.1	476	Pkinase|CBM_2	Amycolatopsis mediterranei U32	CBM2	NO	NO		D8I449
comp13372_c0_seq1 len=3247 path=[1:0-3246]	3247	Pkinase_Tyr|Pkinase	AFO77729.1	470	Pkinase|CBM_2	Amycolatopsis mediterranei S699	CBM2	NO	NO
comp13372_c0_seq1 len=3247 path=[1:0-3246]	3247	Pkinase_Tyr|Pkinase	ADJ46018.1	470	Pkinase|CBM_2	Amycolatopsis mediterranei U32	CBM2	NO	NO		D8HRB6
comp13372_c0_seq1 len=3247 path=[1:0-3246]	3247	Pkinase_Tyr|Pkinase	AEK42803.1	470	Pkinase|CBM_2	Amycolatopsis mediterranei S699	CBM2	NO	NO
comp8590_c0_seq1 len=10252 path=[10636:0-5785 16422:5786-10251]	10252	Pkinase_Tyr|Pkinase|Spc97_Spc98	AEK41742.1	539	Pkinase|CBM_2	Amycolatopsis mediterranei S699	CBM2	NO	NO
comp9273_c0_seq5 len=1857 path=[9606:0-160 7324:161-658 7822:659-928 8092:929-998 8257:999-1456 8768:1457-1856]	1857	Peptidase_S8	AEB45483.1	908	Peptidase_S8|CBM_2	Verrucosispora maris AB-18-032	CBM2	NO	NO
comp7829_c0_seq1 len=4528 path=[3983:0-2580 17:2581-2616 52:2617-4215 1651:4216-4250 1686:4251-4527]	4528	Pkinase_Tyr|Cpn10	AEK41742.1	539	Pkinase|CBM_2	Amycolatopsis mediterranei S699	CBM2	NO	NO
comp7829_c0_seq1 len=4528 path=[3983:0-2580 17:2581-2616 52:2617-4215 1651:4216-4250 1686:4251-4527]	4528	Pkinase_Tyr|Cpn10	ADJ44991.1	471	Pkinase|CBM_2	Amycolatopsis mediterranei U32	CBM2	NO	NO		D8I450
comp7829_c0_seq1 len=4528 path=[3983:0-2580 17:2581-2616 52:2617-4215 1651:4216-4250 1686:4251-4527]	4528	Pkinase_Tyr|Cpn10	AFO76702.1	471	Pkinase|CBM_2	Amycolatopsis mediterranei S699	CBM2	NO	NO
comp3159_c0_seq2 len=1455 path=[1433:0-142 1576:143-1454]	1455	n/a	ADL47349.1	417	CBM_2	Micromonospora aurantiaca ATCC 27029	CBM2	n/a	NO		D9T0B3
comp9273_c0_seq6 len=1871 path=[9606:0-160 7324:161-658 7822:659-928 8173:929-1012 8257:1013-1470 8768:1471-1870]	1871	Peptidase_S8	AEB45483.1	908	Peptidase_S8|CBM_2	Verrucosispora maris AB-18-032	CBM2	NO	NO
comp9273_c0_seq9 len=2005 path=[9606:0-160 7324:161-658 7822:659-928 8092:929-998 8162:999-1009 8173:1010-1093 8257:1094-1551 8715:1552-1604 8768:1605-2004]	2005	Peptidase_S8	AEB45483.1	908	Peptidase_S8|CBM_2	Verrucosispora maris AB-18-032	CBM2	NO	NO
comp2564_c0_seq2 len=7475 path=[7663:0-2447 10321:2448-7474]	7475	PIG-F|GDPD|Fungal_trans|Zn_clus	BAN02470.1	587	GDPD|CBM_2	Acidimicrobidae bacterium YM16-304	CBM2	NO	NO
comp3159_c0_seq1 len=1505 path=[1433:0-142 2959:143-192 1576:193-1504]	1505	n/a	ADU10067.1	468	CBM_2	Micromonospora sp. L5	CBM2	n/a	NO		D3C4U6
comp3159_c0_seq1 len=1505 path=[1433:0-142 2959:143-192 1576:193-1504]	1505	n/a	ADL47349.1	417	CBM_2	Micromonospora aurantiaca ATCC 27029	CBM2	n/a	NO		D9T0B3
comp9273_c0_seq4 len=1910 path=[9606:0-160 7324:161-658 7822:659-928 8092:929-998 8257:999-1456 8715:1457-1509 8768:1510-1909]	1910	Peptidase_S8	AEB45483.1	908	Peptidase_S8|CBM_2	Verrucosispora maris AB-18-032	CBM2	NO	NO
comp4600_c0_seq2 len=1780 path=[1704:0-590 3499:591-644 2295:645-1779]	1780	Peptidase_S8	AEB45483.1	908	Peptidase_S8|CBM_2	Verrucosispora maris AB-18-032	CBM2	NO	NO
comp86659_c0_seq1 len=1336 path=[1:0-1335]	1336	n/a	ADL47349.1	417	CBM_2	Micromonospora aurantiaca ATCC 27029	CBM2	n/a	NO		D9T0B3
comp207754_c0_seq1 len=343 path=[1:0-342]	343	n/a	ADU10067.1	468	CBM_2	Micromonospora sp. L5	CBM2	n/a	NO		D3C4U6
comp207754_c0_seq1 len=343 path=[1:0-342]	343	n/a	ADL47349.1	417	CBM_2	Micromonospora aurantiaca ATCC 27029	CBM2	n/a	YES		D9T0B3
comp108553_c0_seq1 len=808 path=[1:0-807]	808	DUF1593	ABD79446.1	946	CBM_2|Malectin|DUF1593	Saccharophagus degradans 2-40	CBM2|CBM57	NO	YES		Q21PD3
comp27886_c0_seq1 len=1433 path=[1:0-1432]	1433	DUF1593	ABD79446.1	946	CBM_2|Malectin|DUF1593	Saccharophagus degradans 2-40	CBM2|CBM57	NO	NO		Q21PD3
comp254678_c0_seq1 len=328 path=[1:0-327]	328	n/a	ADG74919.1	769	Glyco_hydro_10|CBM_2	Cellulomonas flavigena DSM 20109	CBM2|GH10	n/a	NO		D5UFC2
comp7777_c0_seq3 len=4963 path=[1:0-1285 2839:1286-1410 11722:1411-2052 2964:2053-4962]	4963	Pkinase_Tyr|Pkinase_C	CBZ54290.1	729	Pkinase	Neospora caninum Liverpool	CBM20	NO	NO
comp10010_c0_seq1 len=2584 path=[1:0-2583]	2584	EF_hand_5|EF_hand_6|EF_hand_5|EF_hand_6	CBZ54290.1	729	Pkinase	Neospora caninum Liverpool	CBM20	NO	NO
comp10460_c2_seq1 len=2769 path=[10513:0-9 7777:10-2768]	2769	FHA|Pkinase|Pkinase_Tyr	CBZ54290.1	729	Pkinase	Neospora caninum Liverpool	CBM20	NO	NO
comp3319_c0_seq2 len=7284 path=[1:0-3451 3453:3452-7283]	7284	DUF1966|Alpha-amylase|Fungal_trans|Zn_clus	AEH03024.1	638	Alpha-amylase|DUF1966|CBM_20	Aureobasidium pullulans NRRL Y-12974	CBM20	NO	NO
comp4062_c0_seq1 len=3104 path=[1:0-3069 7869:3070-3103]	3104	Pkinase_Tyr|Pkinase	CBZ54290.1	729	Pkinase	Neospora caninum Liverpool	CBM20	NO	NO
comp2259_c0_seq1 len=6188 path=[6166:0-4744 10911:4745-6187]	6188	Pkinase_Tyr|Pkinase	CBZ54290.1	729	Pkinase	Neospora caninum Liverpool	CBM20	NO	NO
comp12042_c0_seq1 len=3732 path=[3710:0-3731]	3732	Pkinase|Pkinase_Tyr	CBZ54290.1	729	Pkinase	Neospora caninum Liverpool	CBM20	NO	NO
comp8085_c0_seq1 len=1526 path=[1:0-641 698:642-1454 6720:1455-1462 1519:1463-1525]	1526	GDPD|GDPD	AAI68443.1	688	GDPD	Xenopus (Silurana) tropicalis N6 (Nigerian 6th generation inbred)	CBM20	NO	NO		B5DDX4
comp8578_c0_seq6 len=8663 path=[1:0-1494 1496:1495-1719 1721:1720-4527 4529:4528-6354 6422:6355-8662]	8663	Pkinase_Tyr|DUF2361	CBZ54290.1	729	Pkinase	Neospora caninum Liverpool	CBM20	NO	NO
comp9259_c0_seq2 len=4505 path=[4542:0-428 5030:429-607 5209:608-991 5593:992-1096 5698:1097-3278 7880:3279-4504]	4505	SPX|Ank_2|Ank_2|Ank_2	AAI68443.1	688	GDPD	Xenopus (Silurana) tropicalis N6 (Nigerian 6th generation inbred)	CBM20	NO	NO		B5DDX4
comp6059_c0_seq1 len=5001 path=[34:0-4429 4464:4430-4604 4639:4605-5000]	5001	Pkinase_Tyr	CBZ54290.1	729	Pkinase	Neospora caninum Liverpool	CBM20	NO	NO
comp12034_c0_seq1 len=2024 path=[1:0-2023]	2024	Pkinase_Tyr|Pkinase	CBZ54290.1	729	Pkinase	Neospora caninum Liverpool	CBM20	NO	NO
comp4062_c0_seq2 len=3917 path=[1:0-3069 3071:3070-3916]	3917	Pkinase_Tyr|Pkinase	CBZ54290.1	729	Pkinase	Neospora caninum Liverpool	CBM20	NO	NO
comp4289_c0_seq1 len=3003 path=[1:0-3002]	3003	Pkinase_Tyr|Pkinase	CBZ54290.1	729	Pkinase	Neospora caninum Liverpool	CBM20	NO	NO
comp4208_c0_seq1 len=2200 path=[1:0-2199]	2200	Pkinase_Tyr	CBZ54290.1	729	Pkinase	Neospora caninum Liverpool	CBM20	NO	NO
comp8578_c0_seq8 len=9176 path=[1:0-1494 18154:1495-1666 1496:1667-1891 17432:1892-2232 1721:2233-5040 4529:5041-6867 6422:6868-9175]	9176	Pkinase_Tyr|DUF2361	CBZ54290.1	729	Pkinase	Neospora caninum Liverpool	CBM20	NO	NO
comp4159_c0_seq1 len=3357 path=[1:0-2556 2558:2557-3356]	3357	Pkinase_Tyr|Pkinase	CBZ54290.1	729	Pkinase	Neospora caninum Liverpool	CBM20	NO	NO
comp8578_c0_seq3 len=8835 path=[1:0-1494 18154:1495-1666 1496:1667-1891 1721:1892-4699 4529:4700-6526 6422:6527-8834]	8835	Pkinase_Tyr|DUF2361	CBZ54290.1	729	Pkinase	Neospora caninum Liverpool	CBM20	NO	NO
comp6128_c0_seq1 len=4722 path=[4630:0-533 9579:534-603 5164:604-887 5448:888-4721]	4722	Pkinase_Tyr|Pkinase	CBZ54290.1	729	Pkinase	Neospora caninum Liverpool	CBM20	NO	NO
comp2388_c0_seq2 len=4097 path=[4012:0-3459 8124:3460-3522 7472:3523-4096]	4097	GDPD|Ank_4|Ank_2|Ank_2|Ank_4|Ank_2|SPX	AAI68443.1	688	GDPD	Xenopus (Silurana) tropicalis N6 (Nigerian 6th generation inbred)	CBM20	NO	NO		B5DDX4
comp9086_c0_seq3 len=2316 path=[1:0-969 1056:970-1117 1204:1118-1978 2065:1979-2315]	2316	Pkinase_Tyr	CBZ54290.1	729	Pkinase	Neospora caninum Liverpool	CBM20	NO	NO
comp6116_c0_seq1 len=2876 path=[1:0-716 718:717-1949 1954:1950-2875]	2876	Pkinase_Tyr|Pkinase	CBZ54290.1	729	Pkinase	Neospora caninum Liverpool	CBM20	NO	NO
comp8085_c0_seq2 len=1581 path=[1:0-641 643:642-696 698:697-1509 6720:1510-1517 1519:1518-1580]	1581	GDPD|GDPD	ADY41473.1	738	GDPD	Ascaris suum	CBM20	NO	NO
comp8085_c0_seq2 len=1581 path=[1:0-641 643:642-696 698:697-1509 6720:1510-1517 1519:1518-1580]	1581	GDPD|GDPD	ADY40533.1	753	GDPD	Ascaris suum	CBM20	NO	NO
comp9447_c0_seq5 len=11469 path=[1:0-2977 2979:2978-3103 3105:3104-3170 23382:3171-3182 3238:3183-3331 3387:3332-8713 8769:8714-11468]	11469	Ras|HR1|C1_1|C1_1|Pkinase_Tyr|Pkinase_C|She9_MDM33	CBZ54290.1	729	Pkinase	Neospora caninum Liverpool	CBM20	NO	NO
comp4394_c0_seq1 len=4393 path=[4522:0-3989 8655:3990-4392]	4393	Pkinase_Tyr|Pkinase	CBZ54290.1	729	Pkinase	Neospora caninum Liverpool	CBM20	NO	NO
comp3319_c0_seq1 len=7369 path=[1:0-3451 14544:3452-3536 3453:3537-7368]	7369	DUF1966|Alpha-amylase|Fungal_trans|Zn_clus	AEH03024.1	638	Alpha-amylase|DUF1966|CBM_20	Aureobasidium pullulans NRRL Y-12974	CBM20	NO	NO
comp9447_c0_seq2 len=11209 path=[1:0-2977 3105:2978-3044 23372:3045-3052 23066:3053-3071 3387:3072-8453 8769:8454-11208]	11209	Arf|Ras|HR1|C1_1|C1_1|Pkinase_Tyr|Pkinase_C|She9_MDM33	CBZ54290.1	729	Pkinase	Neospora caninum Liverpool	CBM20	NO	NO
comp4394_c0_seq2 len=4536 path=[4522:0-3989 8512:3990-4132 8655:4133-4535]	4536	Pkinase_Tyr|Pkinase	CBZ54290.1	729	Pkinase	Neospora caninum Liverpool	CBM20	NO	NO
comp15722_c0_seq1 len=1341 path=[1319:0-1340]	1341	n/a	CAP92263.1	448	CBM_20	Penicillium chrysogenum Wisconsin 54-1255	CBM20	n/a	NO		B6H504
comp8578_c0_seq7 len=8901 path=[1:0-1494 18154:1495-1666 1496:1667-1891 1721:1892-4699 4529:4700-6526 6356:6527-6592 6422:6593-8900]	8901	Pkinase_Tyr|DUF2361	CBZ54290.1	729	Pkinase	Neospora caninum Liverpool	CBM20	NO	NO
comp4159_c0_seq2 len=3505 path=[1:0-2556 6861:2557-2704 2558:2705-3504]	3505	Pkinase|Pkinase_Tyr	CBZ54290.1	729	Pkinase	Neospora caninum Liverpool	CBM20	NO	NO
comp6049_c0_seq2 len=3308 path=[14754:0-555 7620:556-579 7644:580-3307]	3308	UBA_2|Pkinase_Tyr|Pkinase	CBZ54290.1	729	Pkinase	Neospora caninum Liverpool	CBM20	NO	NO
comp5458_c0_seq1 len=4832 path=[1:0-4831]	4832	Pkinase_Tyr|Pkinase	CBZ54290.1	729	Pkinase	Neospora caninum Liverpool	CBM20	NO	NO
comp11770_c0_seq1 len=4143 path=[4121:0-4142]	4143	Pkinase_Tyr	CBZ54290.1	729	Pkinase	Neospora caninum Liverpool	CBM20	NO	NO
comp8257_c0_seq1 len=2632 path=[1:0-210 212:211-283 285:284-2631]	2632	EF_hand_6|Ank_2|Ank_2|Ank_2	CBZ54290.1	729	Pkinase	Neospora caninum Liverpool	CBM20	NO	NO
comp9259_c0_seq7 len=4953 path=[4542:0-428 4971:429-487 5030:488-666 5209:667-1050 9516:1051-1439 5593:1440-1544 5698:1545-3726 7880:3727-4952]	4953	SPX|Ank_2|Ank_2|Ank_2	AAI68443.1	688	GDPD	Xenopus (Silurana) tropicalis N6 (Nigerian 6th generation inbred)	CBM20	NO	NO		B5DDX4
comp9447_c0_seq1 len=11397 path=[1:0-2977 3105:2978-3044 23372:3045-3052 3180:3053-3098 23382:3099-3110 3238:3111-3259 3387:3260-8641 8769:8642-11396]	11397	Ras|HR1|C1_1|C1_1|Pkinase_Tyr|Pkinase_C|She9_MDM33	CBZ54290.1	729	Pkinase	Neospora caninum Liverpool	CBM20	NO	NO
comp8047_c0_seq1 len=3559 path=[1:0-1565 7907:1566-1566 7064:1567-1617 1568:1618-3558]	3559	Pkinase|Pkinase_Tyr	CBZ54290.1	729	Pkinase	Neospora caninum Liverpool	CBM20	NO	NO
comp9447_c0_seq4 len=11335 path=[1:0-2977 2979:2978-3103 3105:3104-3170 23372:3171-3178 23066:3179-3197 3387:3198-8579 8769:8580-11334]	11335	Arf|Ras|HR1|C1_1|C1_1|Pkinase_Tyr|Pkinase_C|She9_MDM33	CBZ54290.1	729	Pkinase	Neospora caninum Liverpool	CBM20	NO	NO
comp6128_c0_seq4 len=4652 path=[4630:0-533 5164:534-817 5448:818-4651]	4652	Pkinase_Tyr|Pkinase	CBZ54290.1	729	Pkinase	Neospora caninum Liverpool	CBM20	NO	NO
comp9259_c0_seq4 len=4894 path=[4542:0-428 5030:429-607 5209:608-991 9516:992-1380 5593:1381-1485 5698:1486-3667 7880:3668-4893]	4894	SPX|Ank_2|Ank_2|Ank_2	AAI68443.1	688	GDPD	Xenopus (Silurana) tropicalis N6 (Nigerian 6th generation inbred)	CBM20	NO	NO		B5DDX4
comp3663_c0_seq1 len=5335 path=[5313:0-3537 8851:3538-3629 8943:3630-5334]	5335	EPL1|EF_hand_5	CBZ54290.1	729	Pkinase	Neospora caninum Liverpool	CBM20	NO	NO
comp11633_c0_seq1 len=4863 path=[1:0-4862]	4863	Pkinase|Pkinase_Tyr|KA1	CBZ54290.1	729	Pkinase	Neospora caninum Liverpool	CBM20	NO	NO
comp5795_c0_seq1 len=6380 path=[6382:0-676 7059:677-6379]	6380	Pkinase_Tyr|Pkinase	CBZ54290.1	729	Pkinase	Neospora caninum Liverpool	CBM20	NO	NO
comp2388_c0_seq1 len=4034 path=[4012:0-3459 7472:3460-4033]	4034	GDPD|Ank_4|Ank_2|Ank_2|Ank_4|Ank_2|SPX	AAI68443.1	688	GDPD	Xenopus (Silurana) tropicalis N6 (Nigerian 6th generation inbred)	CBM20	NO	NO		B5DDX4
comp2901_c0_seq1 len=2730 path=[2722:0-1345 4068:1346-2729]	2730	Pkinase_Tyr	CBZ54290.1	729	Pkinase	Neospora caninum Liverpool	CBM20	NO	NO
comp8110_c0_seq4 len=5409 path=[5387:0-4514 9902:4515-4972 10360:4973-5065 10453:5066-5408]	5409	Amidase|Pkinase_Tyr|Pkinase	CBZ54290.1	729	Pkinase	Neospora caninum Liverpool	CBM20	NO	NO
comp6291_c0_seq1 len=2793 path=[6117:0-2792]	2793	Pkinase_Tyr	CBZ54290.1	729	Pkinase	Neospora caninum Liverpool	CBM20	NO	NO
comp8257_c0_seq2 len=2460 path=[5791:0-20 5532:21-111 285:112-2459]	2460	EF_hand_6|Ank_2|Ank_2|Ank_2	CBZ54290.1	729	Pkinase	Neospora caninum Liverpool	CBM20	NO	NO
comp9086_c0_seq4 len=2387 path=[1:0-969 1056:970-1117 5188:1118-1121 4834:1122-1188 1204:1189-2049 2065:2050-2386]	2387	Pkinase_Tyr	CBZ54290.1	729	Pkinase	Neospora caninum Liverpool	CBM20	NO	NO
comp9447_c0_seq3 len=11523 path=[1:0-2977 2979:2978-3103 3105:3104-3170 23372:3171-3178 3180:3179-3224 23382:3225-3236 3238:3237-3385 3387:3386-8767 8769:8768-11522]	11523	Ras|HR1|C1_1|C1_1|Pkinase_Tyr|Pkinase_C|She9_MDM33	CBZ54290.1	729	Pkinase	Neospora caninum Liverpool	CBM20	NO	NO
comp8110_c0_seq1 len=5477 path=[5387:0-4514 10885:4515-4582 9902:4583-5040 10360:5041-5133 10453:5134-5476]	5477	Amidase|Pkinase_Tyr|Pkinase	CBZ54290.1	729	Pkinase	Neospora caninum Liverpool	CBM20	NO	NO
comp11142_c0_seq1 len=5793 path=[5771:0-5792]	5793	Pkinase_Tyr|Pkinase	CBZ54290.1	729	Pkinase	Neospora caninum Liverpool	CBM20	NO	NO
comp8047_c0_seq2 len=3898 path=[1:0-1565 7907:1566-1566 7337:1567-1741 7064:1742-1792 7724:1793-1955 1567:1956-1956 1568:1957-3897]	3898	Pkinase_Tyr	CBZ54290.1	729	Pkinase	Neospora caninum Liverpool	CBM20	NO	NO
comp5731_c0_seq1 len=5774 path=[440:0-5773]	5774	Pkinase|Pkinase_Tyr	CBZ54290.1	729	Pkinase	Neospora caninum Liverpool	CBM20	NO	NO
comp8289_c0_seq1 len=4222 path=[10703:0-4221]	4222	Pkinase_Tyr|Pkinase	CBZ54290.1	729	Pkinase	Neospora caninum Liverpool	CBM20	NO	NO
comp6128_c0_seq2 len=4803 path=[4630:0-533 9579:534-603 5164:604-887 9386:888-968 5448:969-4802]	4803	Pkinase_Tyr|Pkinase	CBZ54290.1	729	Pkinase	Neospora caninum Liverpool	CBM20	NO	NO
comp7777_c0_seq4 len=4321 path=[1:0-1285 2839:1286-1410 2964:1411-4320]	4321	Pkinase_Tyr|Pkinase_C	CBZ54290.1	729	Pkinase	Neospora caninum Liverpool	CBM20	NO	NO
comp7777_c0_seq1 len=5873 path=[1:0-1285 1287:1286-2837 2839:2838-2962 2964:2963-5872]	5873	Pkinase_Tyr|Pkinase_C	CBZ54290.1	729	Pkinase	Neospora caninum Liverpool	CBM20	NO	NO
comp8578_c0_seq4 len=9004 path=[1:0-1494 1496:1495-1719 17432:1720-2060 1721:2061-4868 4529:4869-6695 6422:6696-9003]	9004	Pkinase_Tyr|DUF2361	CBZ54290.1	729	Pkinase	Neospora caninum Liverpool	CBM20	NO	NO
comp6618_c1_seq1 len=5093 path=[5071:0-3850 8922:3851-4065 9137:4066-5092]	5093	Pkinase|Pkinase_Tyr|Pkinase|Exo_endo_phos	CBZ54290.1	729	Pkinase	Neospora caninum Liverpool	CBM20	NO	NO
comp8047_c0_seq5 len=3734 path=[1:0-1565 7907:1566-1566 7337:1567-1741 7064:1742-1792 1568:1793-3733]	3734	Pkinase|Pkinase_Tyr	CBZ54290.1	729	Pkinase	Neospora caninum Liverpool	CBM20	NO	NO
comp4362_c0_seq1 len=2769 path=[2747:0-2768]	2769	Peptidase_M76|Pkinase_Tyr	CBZ54290.1	729	Pkinase	Neospora caninum Liverpool	CBM20	NO	NO
comp5609_c0_seq1 len=2841 path=[1:0-307 309:308-472 474:473-2840]	2841	Pkinase_Tyr|Pkinase	CBZ54290.1	729	Pkinase	Neospora caninum Liverpool	CBM20	NO	NO
comp6128_c0_seq3 len=4733 path=[4630:0-533 5164:534-817 9386:818-898 5448:899-4732]	4733	Pkinase_Tyr|Pkinase	CBZ54290.1	729	Pkinase	Neospora caninum Liverpool	CBM20	NO	NO
comp9259_c0_seq1 len=4564 path=[4542:0-428 4971:429-487 5030:488-666 5209:667-1050 5593:1051-1155 5698:1156-3337 7880:3338-4563]	4564	SPX|Ank_2|Ank_2|Ank_2	AAI68443.1	688	GDPD	Xenopus (Silurana) tropicalis N6 (Nigerian 6th generation inbred)	CBM20	NO	NO		B5DDX4
comp3663_c0_seq2 len=5243 path=[5313:0-3537 8943:3538-5242]	5243	EPL1|EF_hand_5	CBZ54290.1	729	Pkinase	Neospora caninum Liverpool	CBM20	NO	NO
comp8047_c0_seq4 len=3723 path=[1:0-1565 7907:1566-1566 7064:1567-1617 7724:1618-1780 1567:1781-1781 1568:1782-3722]	3723	Pkinase_Tyr	CBZ54290.1	729	Pkinase	Neospora caninum Liverpool	CBM20	NO	NO
comp8110_c0_seq2 len=5316 path=[5387:0-4514 9902:4515-4972 10453:4973-5315]	5316	Amidase|Pkinase_Tyr|Pkinase_Tyr|Pkinase	CBZ54290.1	729	Pkinase	Neospora caninum Liverpool	CBM20	NO	NO
comp12374_c0_seq1 len=2560 path=[2:0-2559]	2560	Pkinase|Pkinase_Tyr	CBZ54290.1	729	Pkinase	Neospora caninum Liverpool	CBM20	NO	NO
comp5433_c1_seq1 len=2679 path=[9539:0-2671 12211:2672-2678]	2679	Pkinase_Tyr|Pkinase	CBZ54290.1	729	Pkinase	Neospora caninum Liverpool	CBM20	NO	NO
comp22645_c0_seq1 len=3134 path=[1:0-3133]	3134	Pkinase_Tyr|Pkinase	CBZ54290.1	729	Pkinase	Neospora caninum Liverpool	CBM20	NO	NO
comp9086_c0_seq2 len=2401 path=[1:0-969 971:970-1054 1056:1055-1202 1204:1203-2063 2065:2064-2400]	2401	Pkinase_Tyr	CBZ54290.1	729	Pkinase	Neospora caninum Liverpool	CBM20	NO	NO
comp8578_c0_seq2 len=9070 path=[1:0-1494 1496:1495-1719 17432:1720-2060 1721:2061-4868 4529:4869-6695 6356:6696-6761 6422:6762-9069]	9070	Pkinase_Tyr|DUF2361	CBZ54290.1	729	Pkinase	Neospora caninum Liverpool	CBM20	NO	NO
comp8578_c0_seq1 len=9242 path=[1:0-1494 18154:1495-1666 1496:1667-1891 17432:1892-2232 1721:2233-5040 4529:5041-6867 6356:6868-6933 6422:6934-9241]	9242	Pkinase_Tyr|DUF2361	CBZ54290.1	729	Pkinase	Neospora caninum Liverpool	CBM20	NO	NO
comp8047_c0_seq3 len=3508 path=[1:0-1565 1567:1566-1566 1568:1567-3507]	3508	Pkinase|Pkinase_Tyr	CBZ54290.1	729	Pkinase	Neospora caninum Liverpool	CBM20	NO	NO
comp9086_c0_seq5 len=2472 path=[1:0-969 971:970-1054 1056:1055-1202 5188:1203-1206 4834:1207-1273 1204:1274-2134 2065:2135-2471]	2472	Pkinase_Tyr	CBZ54290.1	729	Pkinase	Neospora caninum Liverpool	CBM20	NO	NO
comp11169_c0_seq1 len=3986 path=[3964:0-3985]	3986	Pkinase_Tyr|Pkinase	CBZ54290.1	729	Pkinase	Neospora caninum Liverpool	CBM20	NO	NO
comp8578_c0_seq5 len=8729 path=[1:0-1494 1496:1495-1719 1721:1720-4527 4529:4528-6354 6356:6355-6420 6422:6421-8728]	8729	Pkinase_Tyr|DUF2361	CBZ54290.1	729	Pkinase	Neospora caninum Liverpool	CBM20	NO	NO
comp10884_c0_seq1 len=7744 path=[1:0-7743]	7744	Pkinase_Tyr|DUF3543	CBZ54290.1	729	Pkinase	Neospora caninum Liverpool	CBM20	NO	NO
comp8110_c0_seq3 len=5384 path=[5387:0-4514 10885:4515-4582 9902:4583-5040 10453:5041-5383]	5384	Amidase|Pkinase_Tyr|Pkinase_Tyr|Pkinase	CBZ54290.1	729	Pkinase	Neospora caninum Liverpool	CBM20	NO	NO
comp7777_c0_seq2 len=6515 path=[1:0-1285 1287:1286-2837 2839:2838-2962 11722:2963-3604 2964:3605-6514]	6515	Pkinase_Tyr|Pkinase_C	CBZ54290.1	729	Pkinase	Neospora caninum Liverpool	CBM20	NO	NO
comp3912_c0_seq1 len=3183 path=[1:0-453 455:454-459 461:460-3182]	3183	Pkinase_C|Pkinase_Tyr|Pkinase	CBZ54290.1	729	Pkinase	Neospora caninum Liverpool	CBM20	NO	NO
comp6396_c0_seq1 len=3906 path=[3884:0-383 4268:384-3905]	3906	CBM_20|Glyco_hydro_15	AEO64596.1	651	Glyco_hydro_15|CBM_20	Thielavia terrestris NRRL 8126	CBM20|GH15	NO	NO
comp130848_c0_seq1 len=295 path=[1:0-294]	295	n/a	EAA64118.1	1277	Glyco_hydro_15|CBM_20|Sulfatase	Aspergillus nidulans FGSC A4	CBM20|GH15	n/a	NO		Q5AS26
comp36_c1_seq1 len=435 path=[503:0-434]	435	Sulfatase	EAA64118.1	1277	Glyco_hydro_15|CBM_20|Sulfatase	Aspergillus nidulans FGSC A4	CBM20|GH15	NO	NO		Q5AS26
comp9480_c0_seq1 len=951 path=[1:0-891 6529:892-950]	951	Sulfatase	EAA64118.1	1277	Glyco_hydro_15|CBM_20|Sulfatase	Aspergillus nidulans FGSC A4	CBM20|GH15	NO	NO		Q5AS26
comp342379_c0_seq1 len=307 path=[1:0-306]	307	n/a	EAA64118.1	1277	Glyco_hydro_15|CBM_20|Sulfatase	Aspergillus nidulans FGSC A4	CBM20|GH15	n/a	NO		Q5AS26
comp6396_c0_seq2 len=3960 path=[3884:0-383 7789:384-436 7842:437-437 4268:438-3959]	3960	CBM_20|Glyco_hydro_15	AEO64596.1	651	Glyco_hydro_15|CBM_20	Thielavia terrestris NRRL 8126	CBM20|GH15	NO	NO
comp9480_c0_seq2 len=3199 path=[1:0-891 893:892-3198]	3199	Sulfatase|Aminotran_5	EAA64118.1	1277	Glyco_hydro_15|CBM_20|Sulfatase	Aspergillus nidulans FGSC A4	CBM20|GH15	NO	NO		Q5AS26
comp336197_c0_seq1 len=338 path=[1:0-337]	338	n/a	EAA64118.1	1277	Glyco_hydro_15|CBM_20|Sulfatase	Aspergillus nidulans FGSC A4	CBM20|GH15	n/a	NO		Q5AS26
comp11751_c0_seq1 len=2514 path=[2492:0-2513]	2514	Sulfatase	EAA64118.1	1277	Glyco_hydro_15|CBM_20|Sulfatase	Aspergillus nidulans FGSC A4	CBM20|GH15	NO	NO		Q5AS26
comp101915_c0_seq1 len=539 path=[1:0-538]	539	Sulfatase	EAA64118.1	1277	Glyco_hydro_15|CBM_20|Sulfatase	Aspergillus nidulans FGSC A4	CBM20|GH15	NO	NO		Q5AS26
comp6396_c0_seq3 len=4109 path=[3884:0-383 7789:384-436 8126:437-585 7842:586-586 4268:587-4108]	4109	CBM_20|Glyco_hydro_15	AEO64596.1	651	Glyco_hydro_15|CBM_20	Thielavia terrestris NRRL 8126	CBM20|GH15	NO	NO
comp37887_c0_seq1 len=1875 path=[1:0-1874]	1875	Sulfatase	EAA64118.1	1277	Glyco_hydro_15|CBM_20|Sulfatase	Aspergillus nidulans FGSC A4	CBM20|GH15	NO	NO		Q5AS26
comp3913_c0_seq1 len=1482 path=[1:0-312 314:313-1481]	1482	SUR7	CCA39882.1	835	SUR7|CBM_21	Pichia pastoris CBS 7435	CBM21	NO	NO
comp7793_c0_seq3 len=5467 path=[5413:0-3674 11003:3675-3704 11097:3705-3706 9088:3707-4452 9834:4453-4620 10002:4621-5466]	5467	CBM_21	XP_367749.1	938	CBM_21	Magnaporthe grisea 70-15	CBM21	YES	NO
comp7793_c0_seq1 len=5435 path=[5413:0-3674 9088:3675-4420 9834:4421-4588 10002:4589-5434]	5435	CBM_21	XP_367749.1	938	CBM_21	Magnaporthe grisea 70-15	CBM21	YES	NO
comp7793_c0_seq2 len=5531 path=[5413:0-3674 11003:3675-3704 11033:3705-3768 11097:3769-3770 9088:3771-4516 9834:4517-4684 10002:4685-5530]	5531	CBM_21	XP_367749.1	938	CBM_21	Magnaporthe grisea 70-15	CBM21	YES	NO
comp9225_c0_seq2 len=6160 path=[1:0-950 1077:951-2462 2589:2463-2651 2778:2652-2731 2858:2732-6159]	6160	Glyco_hydro_71	CAK48462.1	1030	Glyco_hydro_71	Aspergillus niger CBS 513.88	CBM24|GH71	YES	NO		A2QYM7
comp9225_c0_seq4 len=6285 path=[1:0-950 952:951-1075 1077:1076-2587 2589:2588-2776 2778:2777-2856 2858:2857-6284]	6285	Glyco_hydro_71	CAK48462.1	1030	Glyco_hydro_71	Aspergillus niger CBS 513.88	CBM24|GH71	YES	NO		A2QYM7
comp8727_c0_seq1 len=5334 path=[5312:0-4602 9915:4603-4728 10041:4729-5333]	5334	NAD_binding_10	AEV70393.1	1464	CBM_3|Polysacc_deac_1	Clostridium clariflavum DSM 19732	CBM3	NO	NO
comp9453_c1_seq1 len=7462 path=[17557:0-5094 22652:5095-5096 22654:5097-6165 23723:6166-6586 32879:6587-6589 24148:6590-6641 24200:6642-7081 2940:7082-7461]	7462	Atrophin-1|Herpes_BLLF1|HSA|Myb_DNA-bind_6	AEV70393.1	1464	CBM_3|Polysacc_deac_1	Clostridium clariflavum DSM 19732	CBM3	NO	NO
comp7232_c0_seq1 len=4823 path=[4801:0-352 5154:353-2495 7297:2496-4822]	4823	Fungal_trans|Zn_clus	CCH00931.1	1676	CBM_3	Fibrella aestuarina BUZ 2	CBM3	NO	NO
comp3105_c0_seq1 len=2992 path=[1:0-1899 1901:1900-2991]	2992	BIR|BIR	ABK52388.1	1222	Glyco_hydro_6|CBM_3|Glyco_hydro_12|CBM_2	Acidothermus cellulolyticus 11B ATCC 43068	CBM3|GH6|CBM2|GH12	NO	NO	3.2.1.4	A0LSH8
comp8629_c0_seq1 len=2109 path=[1:0-132 134:133-976 978:977-1012 1014:1013-1059 1061:1060-1433 1435:1434-2108]	2109	Phosphoesterase	ACU76193.1	818	Phosphoesterase|DUF756|DUF756|F5_F8_type_C	Catenulispora acidiphila DSM 44928	CBM32	NO	NO		C7Q9M4
comp9383_c0_seq9 len=8847 path=[20643:0-1209 21853:1210-1784 13504:1785-1786 13506:1787-5449 17269:5450-8846]	8847	adh_short|KR|RTA1|Fungal_trans	AFE05031.1	536	F5_F8_type_C	Corallococcus coralloides DSM 2259	CBM32	NO	NO
comp9383_c0_seq9 len=8847 path=[20643:0-1209 21853:1210-1784 13504:1785-1786 13506:1787-5449 17269:5450-8846]	8847	adh_short|KR|RTA1|Fungal_trans	ADO70179.1	588	F5_F8_type_C	Stigmatella aurantiaca DW4/3-1	CBM32	NO	NO		E3FEZ8
comp6174_c0_seq2 len=3973 path=[3951:0-3431 7383:3432-3522 7474:3523-3596 7548:3597-3972]	3973	HAD_2|Pkinase_Tyr	AGL18825.1	556	Pkinase|F5_F8_type_C	Actinoplanes sp. N902-109	CBM32	NO	NO
comp9383_c0_seq6 len=8947 path=[20643:0-1209 21853:1210-1784 13504:1785-1786 13506:1787-5449 17169:5450-5549 17269:5550-8946]	8947	adh_short|KR|RTA1|Fungal_trans	AFE05031.1	536	F5_F8_type_C	Corallococcus coralloides DSM 2259	CBM32	NO	NO
comp9383_c0_seq6 len=8947 path=[20643:0-1209 21853:1210-1784 13504:1785-1786 13506:1787-5449 17169:5450-5549 17269:5550-8946]	8947	adh_short|KR|RTA1|Fungal_trans	ADO70179.1	588	F5_F8_type_C	Stigmatella aurantiaca DW4/3-1	CBM32	NO	NO		E3FEZ8
comp10975_c0_seq1 len=2796 path=[2774:0-2795]	2796	Peptidase_S8|DUF1034	CBM43229.1	623	Peptidase_S8	uncultured organism	CBM32	NO	NO		D7GN83
comp10209_c0_seq1 len=2890 path=[1:0-2889]	2890	DUF1929	CCD44761.1	649	F5_F8_type_C|DUF1929	Botryotinia fuckeliana	CBM32|AA5	NO	NO
comp7647_c0_seq4 len=4390 path=[3935:0-2185 6121:2186-3248 8729:3249-3304 7184:3305-3432 7312:3433-3567 8332:3568-3944 7447:3945-4389]	4390	n/a	AEO59235.1	NA	n/a	Myceliophthora thermophila ATCC 42464	CBM48	n/a	n/a
comp9693_c0_seq20 len=3020 path=[6749:0-59 69:60-1588 1660:1589-1602 1674:1603-2153 6999:2154-2158 6423:2159-2216 2238:2217-2434 2456:2435-2492 2514:2493-2640 2739:2641-2779 2952:2780-3019]	3020	RCC1|Rad9	BAK17762.1	810	RCC1	Solibacillus silvestris StLB046	CBM48	NO	NO
comp9693_c0_seq7 len=3106 path=[1:0-67 69:68-1596 1598:1597-1631 1633:1632-1658 1660:1659-1672 1674:1673-2223 6999:2224-2228 6423:2229-2286 2238:2287-2504 2514:2505-2652 2739:2653-2791 2878:2792-2865 2952:2866-3105]	3106	RCC1|Rad9|Rad9	BAK17762.1	810	RCC1	Solibacillus silvestris StLB046	CBM48	NO	NO
comp9693_c0_seq3 len=2919 path=[6749:0-59 69:60-1588 1598:1589-1623 1633:1624-1650 1660:1651-1664 1674:1665-2215 6999:2216-2220 6423:2221-2278 2238:2279-2496 2456:2497-2554 2514:2555-2702 2662:2703-2779 2739:2780-2918]	2919	RCC1|Rad9	BAK17762.1	810	RCC1	Solibacillus silvestris StLB046	CBM48	NO	NO
comp8729_c0_seq4 len=4874 path=[4852:0-537 5390:538-692 5545:693-1586 6439:1587-4873]	4874	DnaJ|DnaJ_CXXCXGXG|DnaJ_C	ACI49189.1	1267	Alpha-amylase_C|DnaJ	Caenorhabditis sp. PS1010	CBM48	NO	NO		B6VBU6
comp8729_c0_seq8 len=5222 path=[4852:0-537 10167:538-798 10428:799-834 5390:835-989 5545:990-1883 10070:1884-1934 6439:1935-5221]	5222	DnaJ|DnaJ_CXXCXGXG|DnaJ_C	ACI49189.1	1267	Alpha-amylase_C|DnaJ	Caenorhabditis sp. PS1010	CBM48	NO	NO		B6VBU6
comp9693_c0_seq23 len=2722 path=[6749:0-59 69:60-1588 1660:1589-1602 1674:1603-2153 6999:2154-2158 6423:2159-2216 2238:2217-2434 2514:2435-2582 2739:2583-2721]	2722	RCC1|Rad9|Rad9	BAK17762.1	810	RCC1	Solibacillus silvestris StLB046	CBM48	NO	NO
comp9693_c0_seq6 len=3241 path=[1:0-67 69:68-1596 1598:1597-1631 1633:1632-1658 1660:1659-1672 1674:1673-2223 6999:2224-2228 6423:2229-2286 2238:2287-2504 2456:2505-2562 2514:2563-2710 2662:2711-2787 2739:2788-2926 2878:2927-3000 2952:3001-3240]	3241	RCC1|Rad9	BAK17762.1	810	RCC1	Solibacillus silvestris StLB046	CBM48	NO	NO
comp7647_c0_seq1 len=3957 path=[3935:0-2185 6121:2186-3248 7184:3249-3376 7312:3377-3511 7447:3512-3956]	3957	n/a	AEO59235.1	NA	n/a	Myceliophthora thermophila ATCC 42464	CBM48	n/a	n/a
comp9693_c0_seq13 len=2861 path=[6749:0-59 69:60-1588 1598:1589-1623 1633:1624-1650 1660:1651-1664 1674:1665-2215 6999:2216-2220 6423:2221-2278 2238:2279-2496 2514:2497-2644 2662:2645-2721 2739:2722-2860]	2861	RCC1|Rad9|Rad9	BAK17762.1	810	RCC1	Solibacillus silvestris StLB046	CBM48	NO	NO
comp7776_c0_seq1 len=8276 path=[1:0-289 291:290-357 359:358-7290 7292:7291-7327 7329:7328-8275]	8276	SQS_PSY|Pkinase_Tyr	ACY19019.1	1026	Pkinase	Haliangium ochraceum DSM 14365	CBM48	NO	NO		D0LRM7
comp9693_c0_seq11 len=3105 path=[1:0-67 69:68-1596 1660:1597-1610 1674:1611-2161 6999:2162-2166 6423:2167-2224 2238:2225-2442 2456:2443-2500 2514:2501-2648 2662:2649-2725 2739:2726-2864 2952:2865-3104]	3105	RCC1|Rad9|Rad9	BAK17762.1	810	RCC1	Solibacillus silvestris StLB046	CBM48	NO	NO
comp9693_c0_seq16 len=2970 path=[1:0-67 69:68-1596 1660:1597-1610 1674:1611-2161 6999:2162-2166 6423:2167-2224 2238:2225-2442 2514:2443-2590 2739:2591-2729 2952:2730-2969]	2970	RCC1|Rad9|Rad9	BAK17762.1	810	RCC1	Solibacillus silvestris StLB046	CBM48	NO	NO
comp7647_c0_seq5 len=3143 path=[3935:0-2185 7312:2186-2320 8332:2321-2697 7447:2698-3142]	3143	n/a	AEO59235.1	NA	n/a	Myceliophthora thermophila ATCC 42464	CBM48	n/a	n/a
comp9693_c0_seq19 len=3164 path=[1:0-67 69:68-1596 1598:1597-1631 1633:1632-1658 1660:1659-1672 1674:1673-2223 6999:2224-2228 6423:2229-2286 2238:2287-2504 2456:2505-2562 2514:2563-2710 2739:2711-2849 2878:2850-2923 2952:2924-3163]	3164	RCC1|Rad9	BAK17762.1	810	RCC1	Solibacillus silvestris StLB046	CBM48	NO	NO
comp10555_c0_seq1 len=3374 path=[3380:0-3373]	3374	n/a	BAK17762.1	810	RCC1	Solibacillus silvestris StLB046	CBM48	n/a	NO
comp6086_c0_seq2 len=11620 path=[1:0-5859 5926:5860-6254 6321:6255-11619]	11620	Porin_3|DnaJ|ApbA|ApbA_C	ACI49189.1	1267	Alpha-amylase_C|DnaJ	Caenorhabditis sp. PS1010	CBM48	NO	NO		B6VBU6
comp9693_c0_seq2 len=3179 path=[1:0-67 69:68-1596 1660:1597-1610 1674:1611-2161 6999:2162-2166 6423:2167-2224 2238:2225-2442 2456:2443-2500 2514:2501-2648 2662:2649-2725 2739:2726-2864 2878:2865-2938 2952:2939-3178]	3179	RCC1|Rad9	BAK17762.1	810	RCC1	Solibacillus silvestris StLB046	CBM48	NO	NO
comp11754_c0_seq1 len=3312 path=[1:0-3311]	3312	n/a	BAK17762.1	810	RCC1	Solibacillus silvestris StLB046	CBM48	n/a	NO
comp11139_c0_seq1 len=4388 path=[4366:0-4387]	4388	DnaJ|Peptidase_C54	ACI49189.1	1267	Alpha-amylase_C|DnaJ	Caenorhabditis sp. PS1010	CBM48	NO	NO		B6VBU6
comp9693_c0_seq14 len=3171 path=[6749:0-59 69:60-1588 1660:1589-1602 1674:1603-2153 6999:2154-2158 6423:2159-2216 2238:2217-2434 2456:2435-2492 2514:2493-2640 2662:2641-2717 2739:2718-2856 2878:2857-2930 2952:2931-3170]	3171	RCC1|Rad9	BAK17762.1	810	RCC1	Solibacillus silvestris StLB046	CBM48	NO	NO
comp7776_c0_seq2 len=8208 path=[1:0-289 359:290-7222 7292:7223-7259 7329:7260-8207]	8208	SQS_PSY|Pkinase_Tyr	ACY19019.1	1026	Pkinase	Haliangium ochraceum DSM 14365	CBM48	NO	NO		D0LRM7
comp9693_c0_seq12 len=3032 path=[1:0-67 69:68-1596 1598:1597-1631 1633:1632-1658 1660:1659-1672 1674:1673-2223 6999:2224-2228 6423:2229-2286 2238:2287-2504 2514:2505-2652 2739:2653-2791 2952:2792-3031]	3032	RCC1|Rad9|Rad9	BAK17762.1	810	RCC1	Solibacillus silvestris StLB046	CBM48	NO	NO
comp12545_c0_seq1 len=1613 path=[1591:0-1612]	1613	DnaJ|DnaJ_CXXCXGXG|DnaJ_C	ACI49189.1	1267	Alpha-amylase_C|DnaJ	Caenorhabditis sp. PS1010	CBM48	NO	NO		B6VBU6
comp13604_c0_seq1 len=1445 path=[1:0-1444]	1445	DnaJ	ACI49189.1	1267	Alpha-amylase_C|DnaJ	Caenorhabditis sp. PS1010	CBM48	NO	YES		B6VBU6
comp2879_c0_seq1 len=4723 path=[1:0-2709 2711:2710-4722]	4723	CBM_48|Alpha-amylase|Alpha-amylase_C|AAA_16	AEO71574.1	719	Alpha-amylase_C	Thielavia terrestris NRRL 8126	CBM48	NO	NO
comp6065_c0_seq1 len=12508 path=[12512:0-5866 18379:5867-12507]	12508	Nup96|Nucleoporin2	BAK17762.1	810	RCC1	Solibacillus silvestris StLB046	CBM48	NO	NO
comp5147_c0_seq1 len=4674 path=[4652:0-4673]	4674	AMPKBI|Peptidase_M22	CAP73871.1	494	AMPKBI	Podospora anserina S mat+	CBM48	NO	NO		B2B7U2
comp9693_c0_seq1 len=3113 path=[6749:0-59 69:60-1588 1660:1589-1602 1674:1603-2153 6999:2154-2158 6423:2159-2216 2238:2217-2434 2514:2435-2582 2662:2583-2659 2739:2660-2798 2878:2799-2872 2952:2873-3112]	3113	RCC1|Rad9|Rad9	BAK17762.1	810	RCC1	Solibacillus silvestris StLB046	CBM48	NO	NO
comp6086_c0_seq1 len=11685 path=[1:0-5859 5861:5860-5924 5926:5925-6319 6321:6320-11684]	11685	Porin_3|DnaJ|ApbA|ApbA_C	ACI49189.1	1267	Alpha-amylase_C|DnaJ	Caenorhabditis sp. PS1010	CBM48	NO	NO		B6VBU6
comp10804_c0_seq1 len=1740 path=[1718:0-1739]	1740	n/a	BAJ33729.1	NA	n/a	Eutrema halophilum	CBM48	n/a	n/a		E4MVU6
comp10804_c0_seq1 len=1740 path=[1718:0-1739]	1740	n/a	AEE28383.1	NA	n/a	Arabidopsis thaliana	CBM48	n/a	n/a		Q944A6
comp7647_c0_seq2 len=4013 path=[3935:0-2185 6121:2186-3248 8729:3249-3304 7184:3305-3432 7312:3433-3567 7447:3568-4012]	4013	n/a	AEO59235.1	NA	n/a	Myceliophthora thermophila ATCC 42464	CBM48	n/a	n/a
comp9693_c0_seq24 len=3109 path=[1:0-67 69:68-1596 1598:1597-1631 1633:1632-1658 1660:1659-1672 1674:1673-2223 6999:2224-2228 6423:2229-2286 2238:2287-2504 2514:2505-2652 2662:2653-2729 2739:2730-2868 2952:2869-3108]	3109	RCC1|Rad9|Rad9	BAK17762.1	810	RCC1	Solibacillus silvestris StLB046	CBM48	NO	NO
comp9693_c0_seq22 len=3044 path=[1:0-67 69:68-1596 1660:1597-1610 1674:1611-2161 6999:2162-2166 6423:2167-2224 2238:2225-2442 2514:2443-2590 2739:2591-2729 2878:2730-2803 2952:2804-3043]	3044	RCC1|Rad9|Rad9	BAK17762.1	810	RCC1	Solibacillus silvestris StLB046	CBM48	NO	NO
comp9693_c0_seq17 len=3183 path=[1:0-67 69:68-1596 1598:1597-1631 1633:1632-1658 1660:1659-1672 1674:1673-2223 6999:2224-2228 6423:2229-2286 2238:2287-2504 2514:2505-2652 2662:2653-2729 2739:2730-2868 2878:2869-2942 2952:2943-3182]	3183	RCC1|Rad9|Rad9	BAK17762.1	810	RCC1	Solibacillus silvestris StLB046	CBM48	NO	NO
comp9693_c0_seq26 len=3102 path=[1:0-67 69:68-1596 1660:1597-1610 1674:1611-2161 6999:2162-2166 6423:2167-2224 2238:2225-2442 2456:2443-2500 2514:2501-2648 2739:2649-2787 2878:2788-2861 2952:2862-3101]	3102	RCC1|Rad9	BAK17762.1	810	RCC1	Solibacillus silvestris StLB046	CBM48	NO	NO
comp10358_c0_seq1 len=2398 path=[1:0-2397]	2398	DnaJ_C|DnaJ_CXXCXGXG|DnaJ	ACI49189.1	1267	Alpha-amylase_C|DnaJ	Caenorhabditis sp. PS1010	CBM48	NO	NO		B6VBU6
comp9693_c0_seq9 len=3028 path=[1:0-67 69:68-1596 1660:1597-1610 1674:1611-2161 6999:2162-2166 6423:2167-2224 2238:2225-2442 2456:2443-2500 2514:2501-2648 2739:2649-2787 2952:2788-3027]	3028	RCC1|Rad9	BAK17762.1	810	RCC1	Solibacillus silvestris StLB046	CBM48	NO	NO
comp9693_c0_seq18 len=3039 path=[6749:0-59 69:60-1588 1660:1589-1602 1674:1603-2153 6999:2154-2158 6423:2159-2216 2238:2217-2434 2514:2435-2582 2662:2583-2659 2739:2660-2798 2952:2799-3038]	3039	RCC1|Rad9|Rad9	BAK17762.1	810	RCC1	Solibacillus silvestris StLB046	CBM48	NO	NO
comp9693_c0_seq5 len=2784 path=[6749:0-59 69:60-1588 1598:1589-1623 1633:1624-1650 1660:1651-1664 1674:1665-2215 6999:2216-2220 6423:2221-2278 2238:2279-2496 2514:2497-2644 2739:2645-2783]	2784	RCC1|Rad9|Rad9	BAK17762.1	810	RCC1	Solibacillus silvestris StLB046	CBM48	NO	NO
comp9693_c0_seq8 len=3090 path=[1:0-67 69:68-1596 1598:1597-1631 1633:1632-1658 1660:1659-1672 1674:1673-2223 6999:2224-2228 6423:2229-2286 2238:2287-2504 2456:2505-2562 2514:2563-2710 2739:2711-2849 2952:2850-3089]	3090	RCC1|Rad9	BAK17762.1	810	RCC1	Solibacillus silvestris StLB046	CBM48	NO	NO
comp11876_c0_seq1 len=2183 path=[1:0-2182]	2183	DnaJ	ACI49189.1	1267	Alpha-amylase_C|DnaJ	Caenorhabditis sp. PS1010	CBM48	NO	NO		B6VBU6
comp7647_c0_seq6 len=4334 path=[3935:0-2185 6121:2186-3248 7184:3249-3376 7312:3377-3511 8332:3512-3888 7447:3889-4333]	4334	n/a	AEO59235.1	NA	n/a	Myceliophthora thermophila ATCC 42464	CBM48	n/a	n/a
comp9693_c0_seq25 len=3097 path=[6749:0-59 69:60-1588 1660:1589-1602 1674:1603-2153 6999:2154-2158 6423:2159-2216 2238:2217-2434 2456:2435-2492 2514:2493-2640 2662:2641-2717 2739:2718-2856 2952:2857-3096]	3097	RCC1|Rad9|Rad9	BAK17762.1	810	RCC1	Solibacillus silvestris StLB046	CBM48	NO	NO
comp8729_c0_seq6 len=4925 path=[4852:0-537 5390:538-692 5545:693-1586 10070:1587-1637 6439:1638-4924]	4925	DnaJ|DnaJ_CXXCXGXG|DnaJ_C	ACI49189.1	1267	Alpha-amylase_C|DnaJ	Caenorhabditis sp. PS1010	CBM48	NO	NO		B6VBU6
comp9693_c0_seq15 len=3047 path=[1:0-67 69:68-1596 1660:1597-1610 1674:1611-2161 6999:2162-2166 6423:2167-2224 2238:2225-2442 2514:2443-2590 2662:2591-2667 2739:2668-2806 2952:2807-3046]	3047	RCC1|Rad9|Rad9	BAK17762.1	810	RCC1	Solibacillus silvestris StLB046	CBM48	NO	NO
comp10665_c0_seq1 len=1803 path=[1:0-1802]	1803	DnaJ_C|DnaJ_CXXCXGXG|DnaJ	ACI49189.1	1267	Alpha-amylase_C|DnaJ	Caenorhabditis sp. PS1010	CBM48	NO	NO		B6VBU6
comp9693_c0_seq27 len=3094 path=[6749:0-59 69:60-1588 1660:1589-1602 1674:1603-2153 6999:2154-2158 6423:2159-2216 2238:2217-2434 2456:2435-2492 2514:2493-2640 2739:2641-2779 2878:2780-2853 2952:2854-3093]	3094	RCC1|Rad9	BAK17762.1	810	RCC1	Solibacillus silvestris StLB046	CBM48	NO	NO
comp9693_c0_seq10 len=2842 path=[6749:0-59 69:60-1588 1598:1589-1623 1633:1624-1650 1660:1651-1664 1674:1665-2215 6999:2216-2220 6423:2221-2278 2238:2279-2496 2456:2497-2554 2514:2555-2702 2739:2703-2841]	2842	RCC1|Rad9	BAK17762.1	810	RCC1	Solibacillus silvestris StLB046	CBM48	NO	NO
comp7647_c0_seq3 len=2766 path=[3935:0-2185 7312:2186-2320 7447:2321-2765]	2766	n/a	AEO59235.1	NA	n/a	Myceliophthora thermophila ATCC 42464	CBM48	n/a	n/a
comp9693_c0_seq21 len=3167 path=[1:0-67 69:68-1596 1598:1597-1631 1633:1632-1658 1660:1659-1672 1674:1673-2223 6999:2224-2228 6423:2229-2286 2238:2287-2504 2456:2505-2562 2514:2563-2710 2662:2711-2787 2739:2788-2926 2952:2927-3166]	3167	RCC1|Rad9|Rad9	BAK17762.1	810	RCC1	Solibacillus silvestris StLB046	CBM48	NO	NO
comp8729_c0_seq3 len=5171 path=[4852:0-537 10167:538-798 10428:799-834 5390:835-989 5545:990-1883 6439:1884-5170]	5171	DnaJ|DnaJ_CXXCXGXG|DnaJ_C	ACI49189.1	1267	Alpha-amylase_C|DnaJ	Caenorhabditis sp. PS1010	CBM48	NO	NO		B6VBU6
comp9693_c0_seq4 len=3121 path=[1:0-67 69:68-1596 1660:1597-1610 1674:1611-2161 6999:2162-2166 6423:2167-2224 2238:2225-2442 2514:2443-2590 2662:2591-2667 2739:2668-2806 2878:2807-2880 2952:2881-3120]	3121	RCC1|Rad9|Rad9	BAK17762.1	810	RCC1	Solibacillus silvestris StLB046	CBM48	NO	NO
comp19417_c0_seq1 len=2848 path=[2826:0-2847]	2848	n/a	ADQ79792.1	386	Esterase	Paludibacter propionicigenes WB4	CBM48|CE1	n/a	NO		E4T4Z8
comp8411_c0_seq2 len=3796 path=[1:0-226 7634:227-331 228:332-597 567:598-774 744:775-2542 2512:2543-3795]	3796	Peptidase_S8|Peptidase_S8	ACA88898.1	712	Peptidase_S8	Shewanella woodyi ATCC 51908	CBM5	NO	NO		B1KM18
comp8411_c0_seq8 len=3691 path=[1:0-226 228:227-492 567:493-669 744:670-2437 2512:2438-3690]	3691	Peptidase_S8|Peptidase_S8	ACA88898.1	712	Peptidase_S8	Shewanella woodyi ATCC 51908	CBM5	NO	NO		B1KM18
comp10088_c0_seq1 len=1207 path=[1:0-1206]	1207	n/a	CCK24774.1	309	DPBB_1	Streptomyces davawensis JCM 4913	CBM5	n/a	NO
comp16245_c0_seq1 len=2975 path=[2953:0-2974]	2975	Peptidase_S8|Peptidase_S8	ACV48841.1	682	Peptidase_S8	Halomicrobium mukohataei DSM 12286	CBM5	NO	NO		C7P049
comp8184_c0_seq1 len=2659 path=[1:0-1047 1049:1048-2150 2152:2151-2230 2232:2231-2658]	2659	Peptidase_S8	ACV48841.1	682	Peptidase_S8	Halomicrobium mukohataei DSM 12286	CBM5	YES	NO		C7P049
comp8411_c0_seq5 len=3764 path=[1:0-226 228:227-492 494:493-565 567:566-742 744:743-2510 2512:2511-3763]	3764	Peptidase_S8|Peptidase_S8	ACA88898.1	712	Peptidase_S8	Shewanella woodyi ATCC 51908	CBM5	NO	NO		B1KM18
comp7270_c0_seq1 len=5136 path=[1:0-1007 10207:1008-1069 1009:1070-1929 1869:1930-5135]	5136	Peptidase_S8|Peptidase_S8|DUF1034	ACA88898.1	712	Peptidase_S8	Shewanella woodyi ATCC 51908	CBM5	NO	NO		B1KM18
comp8411_c0_seq7 len=3933 path=[1:0-226 7634:227-331 228:332-597 494:598-670 567:671-847 744:848-2615 7895:2616-2679 2512:2680-3932]	3933	Peptidase_S8|Peptidase_S8	ACA88898.1	712	Peptidase_S8	Shewanella woodyi ATCC 51908	CBM5	NO	NO		B1KM18
comp5853_c0_seq1 len=3483 path=[3461:0-879 4341:880-3482]	3483	n/a	CCK24774.1	309	DPBB_1	Streptomyces davawensis JCM 4913	CBM5	n/a	NO
comp8411_c0_seq1 len=3755 path=[1:0-226 228:227-492 567:493-669 744:670-2437 7895:2438-2501 2512:2502-3754]	3755	Peptidase_S8|Peptidase_S8	ACA88898.1	712	Peptidase_S8	Shewanella woodyi ATCC 51908	CBM5	NO	NO		B1KM18
comp5990_c0_seq1 len=2938 path=[2916:0-1157 4074:1158-2937]	2938	DUF1034|Peptidase_S8|Peptidase_S8	ACV48841.1	682	Peptidase_S8	Halomicrobium mukohataei DSM 12286	CBM5	NO	NO		C7P049
comp8184_c0_seq2 len=2579 path=[1:0-1047 1049:1048-2150 2232:2151-2578]	2579	Peptidase_S8	ACV48841.1	682	Peptidase_S8	Halomicrobium mukohataei DSM 12286	CBM5	YES	NO		C7P049
comp8411_c0_seq4 len=3828 path=[1:0-226 228:227-492 494:493-565 567:566-742 744:743-2510 7895:2511-2574 2512:2575-3827]	3828	Peptidase_S8|Peptidase_S8	ACA88898.1	712	Peptidase_S8	Shewanella woodyi ATCC 51908	CBM5	NO	NO		B1KM18
comp6804_c0_seq1 len=3158 path=[1:0-1668 1672:1669-3157]	3158	DUF1034|Peptidase_S8|Peptidase_S8	ACV48841.1	682	Peptidase_S8	Halomicrobium mukohataei DSM 12286	CBM5	NO	NO		C7P049
comp8411_c0_seq6 len=3860 path=[1:0-226 7634:227-331 228:332-597 567:598-774 744:775-2542 7895:2543-2606 2512:2607-3859]	3860	Peptidase_S8|Peptidase_S8	ACA88898.1	712	Peptidase_S8	Shewanella woodyi ATCC 51908	CBM5	NO	NO		B1KM18
comp8411_c0_seq3 len=3869 path=[1:0-226 7634:227-331 228:332-597 494:598-670 567:671-847 744:848-2615 2512:2616-3868]	3869	Peptidase_S8|Peptidase_S8	ACA88898.1	712	Peptidase_S8	Shewanella woodyi ATCC 51908	CBM5	NO	NO		B1KM18
comp12842_c0_seq1 len=3405 path=[3433:0-3404]	3405	Peptidase_S8|Peptidase_S8	ACV48841.1	682	Peptidase_S8	Halomicrobium mukohataei DSM 12286	CBM5	NO	NO		C7P049
comp5798_c0_seq2 len=4172 path=[6325:0-3692 10018:3693-3716 12959:3717-4171]	4172	n/a	ACB77510.1	NA	n/a	Opitutus terrae PB90-1	CBM50	n/a	n/a
comp11646_c0_seq1 len=3047 path=[1:0-3046]	3047	n/a	CCA70547.1	NA	n/a	Piriformospora indica	CBM50	n/a	n/a
comp12218_c0_seq1 len=2295 path=[2273:0-2294]	2295	Peptidase_M14	AFQ43649.1	363	LysM|Peptidase_M14	Desulfosporosinus meridiei DSM 13257	CBM50	NO	NO
comp7972_c0_seq1 len=995 path=[1657:0-228 2731:229-229 2425:230-425 76:426-964 2754:965-965 616:966-994]	995	Peptidase_M14	AGK95929.1	436	PG_binding_1|Peptidase_M14	Clostridium pasteurianum BC1	CBM50	NO	NO
comp8595_c0_seq1 len=4612 path=[4509:0-459 4972:460-565 9349:566-649 5078:650-4611]	4612	MAP7|Trichoplein|ERM|SMC_N|Trichoplein|Myosin_tail_1|SMC_N|SMC_N|Trichoplein|SMC_N|Trichoplein	AGK58357.1	NA	n/a	Hyphomicrobium denitrificans 1NES1	CBM50	n/a	n/a
comp8595_c0_seq2 len=4587 path=[4509:0-459 9064:460-515 4969:516-518 4972:519-624 5078:625-4586]	4587	MAP7|Trichoplein|ERM|SMC_N|Trichoplein|Myosin_tail_1|SMC_N|SMC_N|Trichoplein|SMC_N|Trichoplein	AGK58357.1	NA	n/a	Hyphomicrobium denitrificans 1NES1	CBM50	n/a	n/a
comp11844_c0_seq1 len=2787 path=[2765:0-2786]	2787	n/a	ACB77510.1	NA	n/a	Opitutus terrae PB90-1	CBM50	n/a	n/a
comp4589_c0_seq1 len=4511 path=[4489:0-4510]	4511	HGTP_anticodon|tRNA-synt_2b|tRNA-synt_His|LysM	ADG81515.1	189	LysM	Thermincola sp. JR	CBM50	NO	NO		D5XBW7
comp11274_c0_seq1 len=935 path=[913:0-934]	935	n/a	AGG56590.1	511	B|B|B|B	Staphylococcus aureus AC1354	CBM50	n/a	NO
comp132806_c0_seq1 len=383 path=[1:0-382]	383	n/a	EHK49205.1	NA	n/a	Trichoderma atroviride IMI 206040	CBM50	n/a	n/a
comp133835_c0_seq1 len=717 path=[1:0-716]	717	WSC	CCA72850.1	678	WSC|WSC|WSC|WSC	Piriformospora indica	CBM50	NO	YES
comp9587_c0_seq1 len=5298 path=[11327:0-1055 7108:1056-1079 7132:1080-5297]	5298	Kelch_6|MAD|Cast|AAA_27|DUF3584|Myosin_tail_1|Myosin_tail_1|Myosin_tail_1|Myosin_tail_1|HCR|Filament|CALCOCO1	ACB77510.1	NA	n/a	Opitutus terrae PB90-1	CBM50	n/a	n/a
comp2927_c0_seq1 len=2041 path=[2044:0-1066 3111:1067-2040]	2041	WSC	CCA72850.1	678	WSC|WSC|WSC|WSC	Piriformospora indica	CBM50	NO	NO
comp6503_c0_seq1 len=2415 path=[2393:0-1254 3648:1255-2414]	2415	WSC|WSC	CCA72850.1	678	WSC|WSC|WSC|WSC	Piriformospora indica	CBM50	NO	NO
comp7607_c0_seq3 len=5732 path=[1:0-517 519:518-702 704:703-5731]	5732	CBP4	ACB77510.1	NA	n/a	Opitutus terrae PB90-1	CBM50	n/a	n/a
comp7607_c0_seq1 len=5146 path=[11735:0-26 12038:27-44 11780:45-116 704:117-5145]	5146	n/a	ACB77510.1	NA	n/a	Opitutus terrae PB90-1	CBM50	n/a	n/a
comp7607_c0_seq2 len=5325 path=[11576:0-110 519:111-295 704:296-5324]	5325	CBP4	ACB77510.1	NA	n/a	Opitutus terrae PB90-1	CBM50	n/a	n/a
comp8595_c0_seq3 len=4528 path=[4509:0-459 4972:460-565 5078:566-4527]	4528	MAP7|Trichoplein|ERM|SMC_N|Trichoplein|Myosin_tail_1|SMC_N|SMC_N|Trichoplein|SMC_N|Trichoplein	AGK58357.1	NA	n/a	Hyphomicrobium denitrificans 1NES1	CBM50	n/a	n/a
comp3133_c0_seq1 len=2361 path=[2339:0-2360]	2361	5_nucleotid_C|Metallophos	CCE97351.1	637	Metallophos|5_nucleotid_C	Sinorhizobium fredii HH103	CBM50	NO	NO
comp8856_c0_seq1 len=9270 path=[9248:0-8497 17746:8498-8606 17855:8607-8756 18005:8757-8788 18037:8789-9269]	9270	Filament|Myosin_tail_1|Mcp5_PH	ACB77510.1	NA	n/a	Opitutus terrae PB90-1	CBM50	n/a	n/a
comp12681_c0_seq1 len=2540 path=[1:0-2539]	2540	DUF3584|Myosin_tail_1|DUF812|DUF3584|Cast|Trichoplein|Mitofilin|Myosin_tail_1|SCP-1|Filament|DUF3584|Cast|CALCOCO1|DUF827|CALCOCO1|Cast	AGA34836.1	NA	n/a	Thioalkalivibrio nitratireducens DSM 14787 ALEN 2	CBM50	n/a	n/a
comp148105_c0_seq1 len=329 path=[1:0-328]	329	n/a	CCF70973.1	NA	n/a	Colletotrichum higginsianum IMI349063A	CBM50	n/a	n/a
comp5871_c0_seq1 len=3696 path=[3674:0-2503 6178:2504-3695]	3696	SH3_1	CCF70973.1	NA	n/a	Colletotrichum higginsianum IMI349063A	CBM50	n/a	n/a
comp274308_c0_seq1 len=221 path=[1:0-220]	221	n/a	EHK49205.1	NA	n/a	Trichoderma atroviride IMI 206040	CBM50	n/a	n/a
comp8834_c1_seq1 len=6927 path=[7605:0-5184 12790:5185-5203 12809:5204-6926]	6927	WSC|WSC|DUF1989	CCA72850.1	678	WSC|WSC|WSC|WSC	Piriformospora indica	CBM50	NO	NO
comp7837_c0_seq1 len=3714 path=[6702:0-804 2989:805-825 3009:826-3713]	3714	LysM|Abhydrolase_3	CCD53721.1	408	CVNH	Botryotinia fuckeliana	CBM50	NO	NO
comp11236_c0_seq1 len=2021 path=[1:0-2020]	2021	CVNH	CAP59788.1	375	CVNH	Podospora anserina S mat+	CBM50	YES	NO		B2A9P0
comp8595_c0_seq4 len=4671 path=[4509:0-459 9064:460-515 4969:516-518 4972:519-624 9349:625-708 5078:709-4670]	4671	MAP7|Trichoplein|ERM|SMC_N|Trichoplein|Myosin_tail_1|SMC_N|SMC_N|Trichoplein|SMC_N|Trichoplein	AGK58357.1	NA	n/a	Hyphomicrobium denitrificans 1NES1	CBM50	n/a	n/a
comp10369_c1_seq1 len=4799 path=[438:0-4798]	4799	Pkinase_Tyr|Pkinase|Ribonuc_2-5A	CBI36053.3	521	Pkinase_Tyr	Vitis vinifera	CBM50	NO	NO		D7U0A7
comp7222_c0_seq2 len=1928 path=[2294:0-168 2463:169-1898 4679:1899-1902 4197:1903-1927]	1928	5_nucleotid_C	ABW18467.1	617	Metallophos|5_nucleotid_C	Alkaliphilus oremlandii OhILAs	CBM50	NO	NO
comp197095_c0_seq1 len=475 path=[453:0-474]	475	n/a	EHK49205.1	NA	n/a	Trichoderma atroviride IMI 206040	CBM50	n/a	n/a
comp51306_c0_seq1 len=859 path=[837:0-858]	859	n/a	EAA35795.2	1541	Glyco_hydro_18|Hce2	Neurospora crassa OR74A	CBM50|CBM18|GH18	n/a	NO
comp71809_c0_seq1 len=870 path=[848:0-869]	870	n/a	AEO59465.1	1481	Glyco_hydro_18|Hce2	Myceliophthora thermophila ATCC 42464	CBM50|CBM18|GH18	n/a	NO
comp136041_c0_seq1 len=1140 path=[1118:0-1139]	1140	Glyco_hydro_18	AEO59465.1	1481	Glyco_hydro_18|Hce2	Myceliophthora thermophila ATCC 42464	CBM50|CBM18|GH18	NO	NO
comp712_c0_seq1 len=676 path=[1:0-675]	676	n/a	EAA35795.2	1541	Glyco_hydro_18|Hce2	Neurospora crassa OR74A	CBM50|CBM18|GH18	n/a	NO
comp195398_c0_seq1 len=610 path=[1:0-609]	610	Glyco_hydro_18	EAA35795.2	1541	Glyco_hydro_18|Hce2	Neurospora crassa OR74A	CBM50|CBM18|GH18	NO	NO
comp10184_c0_seq1 len=4167 path=[1:0-4166]	4167	AAA_27|Apolipoprotein|GAS|DUF2046|Apolipoprotein|EzrA|Cast|Trichoplein|SMC_N|ATG16|Myosin_tail_1|DUF827|MAD|HCR|CALCOCO1|SMC_N|Cast|Cast|SMC_N|SCP-1|MAD|DUF3584|AAA_27|AAA_27|Myosin_tail_1	CCO17752.1	NA	n/a	Bathycoccus prasinos RCC 1105	CBM50|CBM20	n/a	n/a
comp9365_c0_seq3 len=10931 path=[1:0-5573 5575:5574-6744 6746:6745-8730 8732:8731-9042 9044:9043-9974 9976:9975-10930]	10931	AAA_27|Cast|AAA_27|Cast|Microtub_assoc|Tropomyosin|AAA_27|Filament|Cast|DUF827|HOOK|EzrA|Golgin_A5|HOOK|DUF827|DUF3584|DUF3584|EzrA|Trichoplein|HOOK|HOOK|Tropomyosin_1|SCP-1|PspA_IM30|Tropomyosin|DUF812|MAD|AAA_27|HCR|HCR|Cast|AAA_13|ERM|Filament|CALCOCO1|MscS_porin|Tropomyosin_1|AAA_13|PspA_IM30|EzrA|AAA_13|Myosin_tail_1|DUF827|HOOK|Filament|GAS|DUF827|Mitofilin|DUF3584|Cast|MscS_porin|DUF827|PA…	CCO17752.1	NA	n/a	Bathycoccus prasinos RCC 1105	CBM50|CBM20	n/a	n/a
comp6161_c0_seq1 len=6645 path=[6551:0-134 13219:135-206 6686:207-6644]	6645	MGS|AICARFT_IMPCHas|AAA_27|Myosin_tail_1|Filament|Myosin_tail_1|AAA_27|MAD|Rab5-bind|MAD|DUF3584|Cast|Cast|HOOK|Myosin_tail_1|Cast	CCO17752.1	NA	n/a	Bathycoccus prasinos RCC 1105	CBM50|CBM20	n/a	n/a
comp5647_c0_seq1 len=4343 path=[4321:0-3246 7568:3247-3264 7586:3265-4342]	4343	DUF3584|HOOK|DUF3584|Filament|DUF827|Mitofilin|CALCOCO1|SMC_N|DUF3584|DUF869|AAA_13|Myosin_tail_1|AAA_27|HOOK|EzrA|Myosin_tail_1|TPR_MLP1_2|MAD|MAD|Filament|ERM|DUF827	CCO17752.1	NA	n/a	Bathycoccus prasinos RCC 1105	CBM50|CBM20	n/a	n/a
comp9618_c0_seq13 len=6395 path=[1:0-2399 2401:2400-2831 2887:2832-3467 12798:3468-3486 3533:3487-4300 12817:4301-4371 4368:4372-4373 4370:4374-6394]	6395	RRN9|Kinesin	CCO17752.1	NA	n/a	Bathycoccus prasinos RCC 1105	CBM50|CBM20	n/a	n/a
comp6122_c0_seq1 len=5519 path=[1:0-5518]	5519	COQ9|DUF3584|DUF3584|AAA_27|Trichoplein|SMC_N|AAA_23	CCO17752.1	NA	n/a	Bathycoccus prasinos RCC 1105	CBM50|CBM20	n/a	n/a
comp7819_c0_seq2 len=8938 path=[2819:0-550 3370:551-8937]	8938	Thi4|MAD|SMC_N|DUF3584|EzrA|EzrA|SCP-1|DUF3584|DUF827|MAD|Cast|Filament|HCR|Cast|AAA_27|MAD|HOOK|DUF3584|Myosin_tail_1|SCP-1|Cast|AAA_27|Kinesin	CCO17752.1	NA	n/a	Bathycoccus prasinos RCC 1105	CBM50|CBM20	n/a	n/a
comp12282_c0_seq1 len=2174 path=[2152:0-2173]	2174	EzrA|DUF827|SCP-1|Cast|Cast|DUF3584|DUF3584|SMC_N|MAD|SCP-1|HCR|CALCOCO1|EzrA|Cast|Myosin_tail_1|BicD|ERM|CALCOCO1|AAA_27|CALCOCO1|AAA_13|Filament|EzrA|DUF3523|Cast|MAD|DUF812|AAA_27|DUF3584|Trichoplein|Tropomyosin|Trichoplein|SMC_N|CALCOCO1|AAA_27|Filament|HOOK|Tropomyosin|ERM|Apolipoprotein|GRIP	CCO17752.1	NA	n/a	Bathycoccus prasinos RCC 1105	CBM50|CBM20	n/a	n/a
comp7903_c0_seq1 len=5621 path=[1:0-2400 2402:2401-4705 10754:4706-4857 11416:4858-4869 11292:4870-4936 10918:4937-4937 4707:4938-5620]	5621	DUF1183|zf-C3HC4_2|BRE1|SMC_N|Myosin_tail_1|Myosin_tail_1|Cast|MAD	CCO17752.1	NA	n/a	Bathycoccus prasinos RCC 1105	CBM50|CBM20	n/a	n/a
comp9365_c0_seq4 len=10982 path=[1:0-5573 5575:5574-6744 6746:6745-8730 22700:8731-8781 8732:8782-9093 9044:9094-10025 9976:10026-10981]	10982	AAA_27|Cast|AAA_27|Cast|Microtub_assoc|Tropomyosin|AAA_27|Filament|Cast|DUF827|HOOK|EzrA|Golgin_A5|HOOK|DUF827|DUF3584|DUF3584|EzrA|Trichoplein|HOOK|HOOK|Tropomyosin_1|SCP-1|PspA_IM30|Tropomyosin|DUF812|MAD|AAA_27|HCR|HCR|Cast|AAA_13|ERM|Filament|CALCOCO1|MscS_porin|Tropomyosin_1|AAA_13|PspA_IM30|EzrA|AAA_13|Myosin_tail_1|DUF827|HOOK|Filament|GAS|DUF827|Mitofilin|DUF3584|Cast|MscS_porin|DUF827|PA…	CCO17752.1	NA	n/a	Bathycoccus prasinos RCC 1105	CBM50|CBM20	n/a	n/a
comp12563_c0_seq1 len=3833 path=[3811:0-3832]	3833	AAA_23|AAA_27|DUF3584|Myosin_tail_1|HOOK|Cast|Myosin_tail_1|Tropomyosin|PspA_IM30|SMC_hinge|Myosin_tail_1|MscS_porin|DUF3584|Myosin_tail_1|Myosin_tail_1|DUF827	CCO17752.1	NA	n/a	Bathycoccus prasinos RCC 1105	CBM50|CBM20	n/a	n/a
comp11416_c0_seq1 len=2927 path=[2905:0-2926]	2927	EzrA|Cast|Myosin_tail_1	CCO17752.1	NA	n/a	Bathycoccus prasinos RCC 1105	CBM50|CBM20	n/a	n/a
comp8305_c0_seq3 len=4719 path=[11145:0-113 10858:114-154 6232:155-4718]	4719	EzrA|Myosin_tail_1|Filament|DUF827|DUF3584|Myosin_tail_1|Myosin_tail_1|DUF827|Myosin_tail_1|Cast|Myosin_tail_1	CCO17752.1	NA	n/a	Bathycoccus prasinos RCC 1105	CBM50|CBM20	n/a	n/a
comp26791_c0_seq1 len=2451 path=[2429:0-2450]	2451	Filament|DUF3584|Myosin_tail_1	CCO17752.1	NA	n/a	Bathycoccus prasinos RCC 1105	CBM50|CBM20	n/a	n/a
comp9618_c0_seq5 len=6440 path=[1:0-2399 2401:2400-2831 2833:2832-2885 2887:2886-3521 13476:3522-3531 3533:3532-4345 12817:4346-4416 4368:4417-4418 4370:4419-6439]	6440	RRN9|Kinesin	CCO17752.1	NA	n/a	Bathycoccus prasinos RCC 1105	CBM50|CBM20	n/a	n/a
comp12797_c0_seq1 len=4315 path=[4293:0-4314]	4315	AAA_21|Cast|Myosin_tail_1|SMC_hinge|AAA_27|DUF827|Myosin_tail_1|Myosin_tail_1|AAA_27|AAA_23|SMC_N	CCO17752.1	NA	n/a	Bathycoccus prasinos RCC 1105	CBM50|CBM20	n/a	n/a
comp8305_c0_seq2 len=5450 path=[5387:0-430 5818:431-843 11387:844-844 10858:845-885 6232:886-5449]	5450	EzrA|Myosin_tail_1|Filament|DUF827|Myosin_tail_1|DUF3584|Myosin_tail_1|DUF827|Myosin_tail_1|Cast|Myosin_tail_1	CCO17752.1	NA	n/a	Bathycoccus prasinos RCC 1105	CBM50|CBM20	n/a	n/a
comp8384_c0_seq2 len=7129 path=[7205:0-1943 9149:1944-2320 9624:2321-2393 9697:2394-7128]	7129	ATG11|DUF3584|HOOK|CALCOCO1|SCP-1|DUF827|MAD|DUF3584|Myosin_tail_1|Cast|MAD|Myosin_tail_1|MAD|Cast|Cast|Cast|Myosin_tail_1|Myosin_tail_1|SMC_N	CCO17752.1	NA	n/a	Bathycoccus prasinos RCC 1105	CBM50|CBM20	n/a	n/a
comp7903_c0_seq2 len=5554 path=[1:0-2400 2402:2401-4705 10754:4706-4857 11416:4858-4869 10918:4870-4870 4707:4871-5553]	5554	DUF1183|zf-C3HC4_2|BRE1|SMC_N|Myosin_tail_1|Myosin_tail_1|Cast|MAD	CCO17752.1	NA	n/a	Bathycoccus prasinos RCC 1105	CBM50|CBM20	n/a	n/a
comp7903_c0_seq4 len=5541 path=[1:0-2400 2402:2401-4705 10754:4706-4857 4707:4858-5540]	5541	DUF1183|zf-C3HC4_2|BRE1|SMC_N|Myosin_tail_1|Myosin_tail_1|Cast|MAD	CCO17752.1	NA	n/a	Bathycoccus prasinos RCC 1105	CBM50|CBM20	n/a	n/a
comp8305_c0_seq5 len=5434 path=[5387:0-430 5818:431-843 10964:844-868 11387:869-869 6232:870-5433]	5434	EzrA|Myosin_tail_1|Filament|DUF827|Myosin_tail_1|DUF3584|Myosin_tail_1|DUF827|Myosin_tail_1|Cast|Myosin_tail_1	CCO17752.1	NA	n/a	Bathycoccus prasinos RCC 1105	CBM50|CBM20	n/a	n/a
comp11682_c0_seq1 len=6754 path=[1:0-6753]	6754	Filament|Myosin_tail_1|MscS_porin|HCR|MscS_porin|CALCOCO1|MAD|DUF827|TPR_MLP1_2|CALCOCO1|Filament|Myosin_tail_1|DUF827|DUF3584|DUF812|EzrA|EzrA|Taxilin|HOOK|Myosin_tail_1|SCP-1|AAA_13|BicD|Cast|MscS_porin|Trichoplein|AAA_27|ERM|EzrA|MAD|DUF3584|HCR|ATG16|Myosin_tail_1|DUF4201|DUF869|SCP-1|DUF827|MscS_porin|DUF3584|MAD|AAA_27|Filament|SCP-1|Myosin_tail_1|SMC_N|DUF3584|AAA_27|HOOK|DUF869|Myosin_tai…	CCO17752.1	NA	n/a	Bathycoccus prasinos RCC 1105	CBM50|CBM20	n/a	n/a
comp11992_c0_seq1 len=3729 path=[1:0-3728]	3729	HOOK|Trichoplein|EzrA|Myosin_tail_1|Myosin_tail_1|MAD|Cast|SCP-1|Cast|DUF3584|MAD|Taxilin|Trichoplein|HCR|AAA_27|SMC_N|SCP-1|CALCOCO1|MAD|GAS|DUF827|BicD|HOOK	CCO17752.1	NA	n/a	Bathycoccus prasinos RCC 1105	CBM50|CBM20	n/a	n/a
comp8305_c0_seq1 len=5409 path=[5387:0-430 5818:431-843 11387:844-844 6232:845-5408]	5409	EzrA|Myosin_tail_1|Filament|DUF827|Myosin_tail_1|DUF3584|Myosin_tail_1|DUF827|Myosin_tail_1|Cast|Myosin_tail_1	CCO17752.1	NA	n/a	Bathycoccus prasinos RCC 1105	CBM50|CBM20	n/a	n/a
comp8384_c0_seq1 len=7227 path=[7205:0-1943 9149:1944-2320 9526:2321-2418 9624:2419-2491 9697:2492-7226]	7227	ATG11|DUF3584|HOOK|CALCOCO1|SCP-1|DUF827|MAD|DUF3584|Myosin_tail_1|Cast|MAD|Myosin_tail_1|MAD|Cast|Cast|Cast|Myosin_tail_1|Myosin_tail_1|SMC_N	CCO17752.1	NA	n/a	Bathycoccus prasinos RCC 1105	CBM50|CBM20	n/a	n/a
comp9992_c0_seq1 len=3986 path=[3969:0-281 4251:282-287 4262:288-3985]	3986	Thioredoxin|Myosin_tail_1|SMC_N|DUF3584|ERM|DUF3584|DUF827|MAD|AAA_27|HCR|Myosin_tail_1|Filament|Trichoplein|AAA_27|AAA_27|Cast|BicD|HOOK|Myosin_tail_1|Trichoplein|Cast|Macoilin	CCO17752.1	NA	n/a	Bathycoccus prasinos RCC 1105	CBM50|CBM20	n/a	n/a
comp8606_c0_seq1 len=6140 path=[6118:0-704 6823:705-1765 7884:1766-5584 11703:5585-6139]	6140	Microtub_assoc|DUF3584|Myosin_tail_1|DUF3584|SCP-1|HOOK|AAA_27|Myosin_tail_1|Trichoplein|Filament|AAA_27|Myosin_tail_1|EzrA|SMC_N|CALCOCO1|Filament|HOOK|Macoilin|Tropomyosin_1|Taxilin|ERM|MAD|Tropomyosin|Trichoplein|SMC_N|Myosin_tail_1|Mto2_bdg	CCO17752.1	NA	n/a	Bathycoccus prasinos RCC 1105	CBM50|CBM20	n/a	n/a
comp8856_c0_seq1 len=9270 path=[9248:0-8497 17746:8498-8606 17855:8607-8756 18005:8757-8788 18037:8789-9269]	9270	Filament|Myosin_tail_1|Mcp5_PH	CCO17752.1	NA	n/a	Bathycoccus prasinos RCC 1105	CBM50|CBM20	n/a	n/a
comp7649_c0_seq1 len=6533 path=[13141:0-6 6532:7-6532]	6533	PTH2	CCO17752.1	NA	n/a	Bathycoccus prasinos RCC 1105	CBM50|CBM20	n/a	n/a
comp7694_c0_seq1 len=4224 path=[1:0-3897 3899:3898-4223]	4224	Cast|MAD|Myosin_tail_1|DUF3584|Cep57_MT_bd	CCO17752.1	NA	n/a	Bathycoccus prasinos RCC 1105	CBM50|CBM20	n/a	n/a
comp6161_c0_seq2 len=6573 path=[6551:0-134 6686:135-6572]	6573	MGS|AICARFT_IMPCHas|AAA_27|Myosin_tail_1|Filament|Myosin_tail_1|AAA_27|MAD|Rab5-bind|MAD|DUF3584|Cast|Cast|HOOK|Myosin_tail_1|Cast	CCO17752.1	NA	n/a	Bathycoccus prasinos RCC 1105	CBM50|CBM20	n/a	n/a
comp7903_c0_seq3 len=5389 path=[1:0-2400 2402:2401-4705 4707:4706-5388]	5389	DUF1183|zf-C3HC4_2|BRE1|SMC_N|Myosin_tail_1|Myosin_tail_1|Cast|MAD|Cast	CCO17752.1	NA	n/a	Bathycoccus prasinos RCC 1105	CBM50|CBM20	n/a	n/a
comp9618_c0_seq8 len=6449 path=[1:0-2399 2401:2400-2831 2833:2832-2885 2887:2886-3521 12798:3522-3540 3533:3541-4354 12817:4355-4425 4368:4426-4427 4370:4428-6448]	6449	RRN9|Kinesin	CCO17752.1	NA	n/a	Bathycoccus prasinos RCC 1105	CBM50|CBM20	n/a	n/a
comp8305_c0_seq4 len=5475 path=[5387:0-430 5818:431-843 10964:844-868 11387:869-869 10858:870-910 6232:911-5474]	5475	EzrA|Myosin_tail_1|Filament|DUF827|Myosin_tail_1|DUF3584|Myosin_tail_1|DUF827|Myosin_tail_1|Cast|Myosin_tail_1	CCO17752.1	NA	n/a	Bathycoccus prasinos RCC 1105	CBM50|CBM20	n/a	n/a
comp7819_c0_seq1 len=8636 path=[29932:0-245 30488:246-248 3370:249-8635]	8636	Thi4|MAD|SMC_N|DUF3584|EzrA|EzrA|SCP-1|DUF3584|DUF827|MAD|Cast|Filament|HCR|Cast|AAA_27|MAD|HOOK|DUF3584|Myosin_tail_1|SCP-1|Cast|AAA_27|Kinesin	CCO17752.1	NA	n/a	Bathycoccus prasinos RCC 1105	CBM50|CBM20	n/a	n/a
comp10943_c0_seq1 len=7569 path=[7547:0-7568]	7569	GATase|Anth_synt_I_N|Chorismate_bind|DUF3584|Cast|DUF3584|SMC_hinge|Myosin_tail_1|Trichoplein|Cast|Myosin_tail_1|AAA_23|SMC_N	CCO17752.1	NA	n/a	Bathycoccus prasinos RCC 1105	CBM50|CBM20	n/a	n/a
comp9365_c0_seq2 len=7141 path=[1:0-5573 5575:5574-6744 21840:6745-7140]	7141	AAA_27|Cast|AAA_27|Cast|Microtub_assoc|Tropomyosin|AAA_27|Filament|Cast|DUF827|HOOK|EzrA|Golgin_A5|HOOK|DUF827|DUF3584|DUF3584|EzrA|Trichoplein|HOOK|HOOK|Tropomyosin_1|SCP-1|PspA_IM30|Tropomyosin|DUF812|MAD|AAA_27|HCR|HCR|Cast|AAA_13|ERM|Filament|CALCOCO1|MscS_porin|Tropomyosin_1|AAA_13|PspA_IM30|EzrA|AAA_13|Myosin_tail_1|DUF827|HOOK|Filament|GAS|DUF827|Mitofilin|DUF3584|Cast|MscS_porin|DUF827|PA…	CCO17752.1	NA	n/a	Bathycoccus prasinos RCC 1105	CBM50|CBM20	n/a	n/a
comp9618_c0_seq7 len=6386 path=[1:0-2399 2401:2400-2831 2887:2832-3467 13476:3468-3477 3533:3478-4291 12817:4292-4362 4368:4363-4364 4370:4365-6385]	6386	RRN9|Kinesin	CCO17752.1	NA	n/a	Bathycoccus prasinos RCC 1105	CBM50|CBM20	n/a	n/a
comp7819_c0_seq3 len=8946 path=[29932:0-245 30178:246-555 30488:556-558 3370:559-8945]	8946	Thi4|MAD|SMC_N|DUF3584|EzrA|EzrA|SCP-1|DUF3584|DUF827|MAD|Cast|Filament|HCR|Cast|AAA_27|MAD|HOOK|DUF3584|Myosin_tail_1|SCP-1|Cast|AAA_27|Kinesin	CCO17752.1	NA	n/a	Bathycoccus prasinos RCC 1105	CBM50|CBM20	n/a	n/a
comp5800_c0_seq1 len=5586 path=[5564:0-1 5566:2-37 5602:38-5585]	5586	SbcCD_C|MAD|DUF3584|CALCOCO1|Myosin_tail_1|DUF827|HCR|Cast|DUF3584|MAD|SCP-1|Myosin_tail_1|AAA_27|Cast|DUF3584|Myosin_tail_1|AAA_27|Cast|MAD|DUF3584|DUF827|Myosin_tail_1|AAA_23|SMC_N	CCO17752.1	NA	n/a	Bathycoccus prasinos RCC 1105	CBM50|CBM20	n/a	n/a
comp10767_c0_seq1 len=4100 path=[4078:0-4099]	4100	Kinesin|Myosin_tail_1|DUF827|Cast|Myosin_tail_1|Macoilin	CCO17752.1	NA	n/a	Bathycoccus prasinos RCC 1105	CBM50|CBM20	n/a	n/a
comp9093_c0_seq1 len=4048 path=[1:0-1399 1401:1400-4047]	4048	SMC_N|AAA_23|SMC_N|DUF3584|Trichoplein|AAA_27|Myosin_tail_1|Myosin_tail_1|DUF3584	CCO17752.1	NA	n/a	Bathycoccus prasinos RCC 1105	CBM50|CBM20	n/a	n/a
comp7875_c0_seq1 len=2281 path=[1:0-940 942:941-1141 1143:1142-2280]	2281	Glyco_hydro_18	AEO65134.1	920	Glyco_hydro_18	Thielavia terrestris NRRL 8126	CBM50|GH18	YES	NO
comp10751_c0_seq1 len=510 path=[1:0-509]	510	n/a	CAP68130.1	1061	Glyco_hydro_18	Podospora anserina S mat+	CBM50|GH18	n/a	NO		B2AUQ7
comp5253_c0_seq1 len=3184 path=[3162:0-3183]	3184	n/a	AEO65134.1	920	Glyco_hydro_18	Thielavia terrestris NRRL 8126	CBM50|GH18	n/a	NO
comp6700_c2_seq1 len=1236 path=[7251:0-1226 8478:1227-1235]	1236	YL1_C	ACU64310.1	632	Glucosaminidase	Chitinophaga pinensis DSM 2588	CBM50|GH73	NO	NO		C7PR71
comp30712_c0_seq1 len=1475 path=[1453:0-1474]	1475	LIP	ADU49754.1	734	NPCBM|NPCBM|LIP	Intrasporangium calvum DSM 43043	CBM51	NO	NO
comp13519_c0_seq1 len=1860 path=[1:0-1859]	1860	LIP	ADU49754.1	734	NPCBM|NPCBM|LIP	Intrasporangium calvum DSM 43043	CBM51	NO	NO
comp12658_c0_seq1 len=1637 path=[1:0-1636]	1637	LIP	ADU49754.1	734	NPCBM|NPCBM|LIP	Intrasporangium calvum DSM 43043	CBM51	NO	NO
comp9366_c0_seq1 len=5880 path=[1:0-719 721:720-3873 3875:3874-5879]	5880	DUF500	ADO69936.1	NA	n/a	Stigmatella aurantiaca DW4/3-1	CBM56|GH55	n/a	n/a		E3FZS1
comp9366_c0_seq2 len=6027 path=[1:0-719 721:720-3873 11770:3874-4020 3875:4021-6026]	6027	DUF500	ADO69936.1	NA	n/a	Stigmatella aurantiaca DW4/3-1	CBM56|GH55	n/a	n/a		E3FZS1
comp122558_c0_seq1 len=535 path=[513:0-534]	535	n/a	EAR01118.1	3841	Malectin|CotH	Flavobacteriales bacterium HTCC2170	CBM57	n/a	NO		A4AT33
comp10976_c0_seq1 len=2381 path=[1:0-2380]	2381	Pkinase|Pkinase_Tyr	BAJ53166.1	940	Malectin|Pkinase_Tyr	Jatropha curcas Palawan	CBM57	NO	NO
comp7592_c0_seq2 len=4043 path=[4021:0-383 4405:384-2599 6621:2600-2662 6684:2663-4042]	4043	Pkinase_Tyr|RA|SAM_1|SAM_2	AEE28156.1	1033	Malectin|Pkinase_Tyr	Arabidopsis thaliana	CBM57	NO	NO
comp7592_c0_seq2 len=4043 path=[4021:0-383 4405:384-2599 6621:2600-2662 6684:2663-4042]	4043	Pkinase_Tyr|RA|SAM_1|SAM_2	AEE28155.1	1027	Malectin|Pkinase_Tyr	Arabidopsis thaliana	CBM57	NO	NO
comp7592_c0_seq1 len=3980 path=[4021:0-383 4405:384-2599 6684:2600-3979]	3980	Pkinase_Tyr|RA|SAM_1|SAM_2	AEE28156.1	1033	Malectin|Pkinase_Tyr	Arabidopsis thaliana	CBM57	NO	NO
comp7592_c0_seq1 len=3980 path=[4021:0-383 4405:384-2599 6684:2600-3979]	3980	Pkinase_Tyr|RA|SAM_1|SAM_2	AEE28155.1	1027	Malectin|Pkinase_Tyr	Arabidopsis thaliana	CBM57	NO	NO
comp9353_c1_seq1 len=3463 path=[506:0-10 517:11-871 8340:872-882 7882:883-931 1378:932-934 1381:935-3462]	3463	Pkinase_Tyr|Pkinase	AEE75574.1	1033	Malectin|Pkinase_Tyr	Arabidopsis thaliana	CBM57	NO	NO
comp12259_c0_seq1 len=5935 path=[5913:0-5934]	5935	Ad_cyc_g-alpha|RA|LRR_8|PP2C|Guanylate_cyc	BAJ53166.1	940	Malectin|Pkinase_Tyr	Jatropha curcas Palawan	CBM57	NO	NO
comp6115_c0_seq4 len=2784 path=[1:0-57 59:58-795 5476:796-888 797:889-2783]	2784	Pkinase_Tyr|Pkinase	AEO14875.1	1040	Malectin|Pkinase	Glycine max	CBM57	NO	NO
comp5732_c1_seq1 len=4086 path=[4737:0-2225 6963:2226-3412 8150:3413-4085]	4086	adh_short	AEM71370.1	2409	Malectin	Muricauda ruestringensis DSM 13258	CBM57	NO	NO
comp6115_c0_seq3 len=2691 path=[1:0-57 59:58-795 797:796-2690]	2691	Pkinase_Tyr|Pkinase	AEO14875.1	1040	Malectin|Pkinase	Glycine max	CBM57	NO	NO
comp5732_c1_seq2 len=4176 path=[4737:0-2225 9609:2226-2294 9678:2295-2315 6963:2316-3502 8150:3503-4175]	4176	adh_short	AEM71370.1	2409	Malectin	Muricauda ruestringensis DSM 13258	CBM57	NO	NO
comp6115_c0_seq2 len=2747 path=[1:0-57 5671:58-113 59:114-851 797:852-2746]	2747	Pkinase_Tyr|Pkinase	AEO14875.1	1040	Malectin|Pkinase	Glycine max	CBM57	NO	NO
comp966_c0_seq1 len=562 path=[541:0-491 1034:492-561]	562	Pkinase	AEO14875.1	1040	Malectin|Pkinase	Glycine max	CBM57	NO	NO
comp6115_c0_seq1 len=2840 path=[1:0-57 5671:58-113 59:114-851 5476:852-944 797:945-2839]	2840	Pkinase_Tyr|Pkinase	AEO14875.1	1040	Malectin|Pkinase	Glycine max	CBM57	NO	NO
comp9353_c1_seq2 len=3403 path=[506:0-10 517:11-871 1378:872-874 1381:875-3402]	3403	Pkinase_Tyr|Pkinase	BAJ53166.1	940	Malectin|Pkinase_Tyr	Jatropha curcas Palawan	CBM57	NO	NO
comp8917_c0_seq1 len=3366 path=[9369:0-179 9952:180-181 1434:182-2629 3882:2630-3365]	3366	Pkinase_Tyr|Pkinase	CAM03105.1	541	Pkinase|CBM_6	Saccharopolyspora erythraea NRRL 2338	CBM6	NO	NO		A4FGD0
comp8917_c0_seq3 len=4723 path=[1:0-571 9727:572-677 573:678-1536 9952:1537-1538 1434:1539-3986 3882:3987-4722]	4723	Pkinase_Tyr|Pkinase	CAM03105.1	541	Pkinase|CBM_6	Saccharopolyspora erythraea NRRL 2338	CBM6	NO	NO		A4FGD0
comp11289_c0_seq1 len=3449 path=[3427:0-3448]	3449	Pkinase_Tyr|Pkinase	CAM03105.1	541	Pkinase|CBM_6	Saccharopolyspora erythraea NRRL 2338	CBM6	NO	NO		A4FGD0
comp2365_c0_seq1 len=5086 path=[5064:0-5085]	5086	PBD|Pkinase|Pkinase_Tyr	CAM03105.1	541	Pkinase|CBM_6	Saccharopolyspora erythraea NRRL 2338	CBM6	NO	NO		A4FGD0
comp6014_c0_seq3 len=2811 path=[2802:0-1273 5625:1274-1274 4090:1275-2810]	2811	Pkinase_Tyr|Pkinase	CAM03105.1	541	Pkinase|CBM_6	Saccharopolyspora erythraea NRRL 2338	CBM6	NO	NO		A4FGD0
comp6598_c0_seq1 len=1721 path=[1:0-1401 1403:1402-1439 1441:1440-1494 1496:1495-1720]	1721	DUF1996	AGL19664.1	503	CBM_6|DUF1996	Actinoplanes sp. N902-109	CBM6	NO	NO
comp8917_c0_seq2 len=4617 path=[1:0-571 573:572-1430 9952:1431-1432 1434:1433-3880 3882:3881-4616]	4617	Pkinase_Tyr|Pkinase	CAM03105.1	541	Pkinase|CBM_6	Saccharopolyspora erythraea NRRL 2338	CBM6	NO	NO		A4FGD0
comp7950_c0_seq1 len=5075 path=[5114:0-408 5523:409-541 5656:542-2075 7251:2076-5074]	5075	Pkinase_Tyr|Pkinase|Pkinase_Tyr|Pkinase	CAM03105.1	541	Pkinase|CBM_6	Saccharopolyspora erythraea NRRL 2338	CBM6	NO	NO		A4FGD0
comp6014_c0_seq1 len=2959 path=[2802:0-1273 6031:1274-1287 5919:1288-1377 5672:1378-1421 5625:1422-1422 4090:1423-2958]	2959	Pkinase_Tyr|Pkinase	CAM03105.1	541	Pkinase|CBM_6	Saccharopolyspora erythraea NRRL 2338	CBM6	NO	NO		A4FGD0
comp6014_c0_seq2 len=2869 path=[2802:0-1273 6031:1274-1287 5672:1288-1331 5625:1332-1332 4090:1333-2868]	2869	Pkinase_Tyr|Pkinase	CAM03105.1	541	Pkinase|CBM_6	Saccharopolyspora erythraea NRRL 2338	CBM6	NO	NO		A4FGD0
comp6598_c0_seq2 len=1628 path=[1:0-1401 1496:1402-1627]	1628	DUF1996	AGL19664.1	503	CBM_6|DUF1996	Actinoplanes sp. N902-109	CBM6	NO	NO
comp7950_c0_seq2 len=5136 path=[5114:0-408 5523:409-541 5656:542-2075 7190:2076-2136 7251:2137-5135]	5136	Pkinase_Tyr|Pkinase|Pkinase_Tyr|Pkinase	CAM03105.1	541	Pkinase|CBM_6	Saccharopolyspora erythraea NRRL 2338	CBM6	NO	NO		A4FGD0
comp6243_c0_seq1 len=6380 path=[6358:0-677 7036:678-6379]	6380	Pkinase|Pkinase_Tyr	CAM03105.1	541	Pkinase|CBM_6	Saccharopolyspora erythraea NRRL 2338	CBM6	NO	NO		A4FGD0
comp6014_c0_seq4 len=2824 path=[2802:0-1273 6031:1274-1287 4090:1288-2823]	2824	Pkinase_Tyr|Pkinase	CAM03105.1	541	Pkinase|CBM_6	Saccharopolyspora erythraea NRRL 2338	CBM6	NO	NO		A4FGD0
comp100865_c0_seq1 len=478 path=[1:0-477]	478	n/a	ADO73503.1	731	F5_F8_type_C|CBM_6	Stigmatella aurantiaca DW4/3-1	CBM6|CBM32	n/a	NO		E3FVW3
comp8631_c0_seq2 len=3403 path=[3276:0-264 6574:265-369 3541:370-3402]	3403	CLP_protease|CBM_1|CBM_6|Glyco_hydro_43	CAP65087.1	592	Glyco_hydro_43|CBM_6	Podospora anserina S mat+	CBM6|GH43	NO	NO		B2AM98
comp8631_c0_seq1 len=3298 path=[3276:0-264 3541:265-3297]	3298	CLP_protease|CBM_1|CBM_6|Glyco_hydro_43	CAP65087.1	592	Glyco_hydro_43|CBM_6	Podospora anserina S mat+	CBM6|GH43	NO	NO		B2AM98
comp8261_c0_seq5 len=3396 path=[1:0-242 244:243-499 501:500-2754 2756:2755-3091 3093:3092-3144 3146:3145-3236 3238:3237-3395]	3396	n/a	ACU74083.1	579	CBM_6	Catenulispora acidiphila DSM 44928	CBM6|GH64	n/a	NO		C7Q6P8
comp8261_c0_seq1 len=3139 path=[1:0-242 501:243-2497 2756:2498-2834 3093:2835-2887 3146:2888-2979 3238:2980-3138]	3139	n/a	ACU74083.1	579	CBM_6	Catenulispora acidiphila DSM 44928	CBM6|GH64	n/a	NO		C7Q6P8
comp8261_c0_seq2 len=2802 path=[1:0-242 501:243-2497 3093:2498-2550 3146:2551-2642 3238:2643-2801]	2802	n/a	ACU74083.1	579	CBM_6	Catenulispora acidiphila DSM 44928	CBM6|GH64	n/a	NO		C7Q6P8
comp8261_c0_seq6 len=2967 path=[1:0-242 244:243-499 501:500-2754 3093:2755-2807 3238:2808-2966]	2967	n/a	ACU74083.1	579	CBM_6	Catenulispora acidiphila DSM 44928	CBM6|GH64	n/a	NO		C7Q6P8
comp8261_c0_seq3 len=3047 path=[1:0-242 501:243-2497 2756:2498-2834 3093:2835-2887 3238:2888-3046]	3047	n/a	ACU74083.1	579	CBM_6	Catenulispora acidiphila DSM 44928	CBM6|GH64	n/a	NO		C7Q6P8
comp8261_c0_seq7 len=2710 path=[1:0-242 501:243-2497 3093:2498-2550 3238:2551-2709]	2710	n/a	ACU74083.1	579	CBM_6	Catenulispora acidiphila DSM 44928	CBM6|GH64	n/a	NO		C7Q6P8
comp8261_c0_seq8 len=3304 path=[1:0-242 244:243-499 501:500-2754 2756:2755-3091 3093:3092-3144 3238:3145-3303]	3304	n/a	ACU74083.1	579	CBM_6	Catenulispora acidiphila DSM 44928	CBM6|GH64	n/a	NO		C7Q6P8
comp8261_c0_seq4 len=3059 path=[1:0-242 244:243-499 501:500-2754 3093:2755-2807 3146:2808-2899 3238:2900-3058]	3059	n/a	ACU74083.1	579	CBM_6	Catenulispora acidiphila DSM 44928	CBM6|GH64	n/a	NO		C7Q6P8
comp9584_c0_seq2 len=4022 path=[3780:0-466 4247:467-658 4439:659-732 4513:733-993 4774:994-2696 6477:2697-2709 15978:2710-2720 8601:2721-4021]	4022	Peptidase_M4|Peptidase_M4_C	BAE62388.1	NA	n/a	Aspergillus oryzae RIB40	CBM63	n/a	n/a		Q2U7S7
comp8403_c0_seq2 len=1464 path=[4690:0-889 9402:890-1463]	1464	n/a	BAE62388.1	NA	n/a	Aspergillus oryzae RIB40	CBM63	n/a	n/a		Q2U7S7
comp8403_c0_seq1 len=4772 path=[4690:0-889 5580:890-3853 10631:3854-3913 8544:3914-4514 9145:4515-4771]	4772	n/a	BAE62388.1	NA	n/a	Aspergillus oryzae RIB40	CBM63	n/a	n/a		Q2U7S7
comp9584_c0_seq1 len=3948 path=[3780:0-466 4247:467-658 4513:659-919 4774:920-2622 6477:2623-2635 15978:2636-2646 8601:2647-3947]	3948	Peptidase_M4|Peptidase_M4_C	BAE62388.1	NA	n/a	Aspergillus oryzae RIB40	CBM63	n/a	n/a		Q2U7S7
comp43672_c0_seq1 len=1075 path=[1:0-1074]	1075	n/a	CAK47858.1	NA	n/a	Aspergillus niger CBS 513.88	CBM63	n/a	n/a		A2QGR1
comp8403_c0_seq3 len=4712 path=[4690:0-889 5580:890-3853 8544:3854-4454 9145:4455-4711]	4712	Fungal_trans	BAE62388.1	NA	n/a	Aspergillus oryzae RIB40	CBM63	n/a	n/a		Q2U7S7
comp7270_c0_seq3 len=1941 path=[1:0-1007 1009:1008-1867 10292:1868-1940]	1941	Peptidase_S8	ABG39167.1	891	Peptidase_S8	Pseudoalteromonas atlantica T6c	CBM67	YES	NO
comp7270_c0_seq2 len=5074 path=[1:0-1007 1009:1008-1867 1869:1868-5073]	5074	Peptidase_S8|Peptidase_S8|DUF1034	ABG39167.1	891	Peptidase_S8	Pseudoalteromonas atlantica T6c	CBM67	NO	NO
comp43883_c0_seq1 len=996 path=[1:0-995]	996	n/a	AEL24959.1	256	DUF1083	Cyclobacterium marinum DSM 745	CBM9	n/a	NO
comp2417_c0_seq1 len=1947 path=[1:0-617 619:618-1946]	1947	n/a	CAP64863.1	NA	n/a	Podospora anserina S mat+	CE1	n/a	n/a		B2ALM5
comp129077_c0_seq1 len=534 path=[512:0-533]	534	n/a	CBY01607.1	323	Esterase_phd	Leptosphaeria maculans v23.1.3	CE1	n/a	NO		E5AEG8
comp3793_c0_seq2 len=4641 path=[4553:0-4102 9128:4103-4168 8656:4169-4640]	4641	CDP-OH_P_transf|Esterase	CAP65928.1	469	Esterase	Podospora anserina S mat+	CE1	NO	NO		B2APJ6
comp8753_c0_seq2 len=1717 path=[1:0-1499 1501:1500-1538 3619:1539-1544 3382:1545-1595 1546:1596-1596 1547:1597-1716]	1717	n/a	BAE55946.1	NA	n/a	Aspergillus oryzae RIB40	CE1	n/a	n/a		Q2UR69
comp8753_c0_seq1 len=1659 path=[1:0-1499 1501:1500-1538 1547:1539-1658]	1659	n/a	BAE55946.1	NA	n/a	Aspergillus oryzae RIB40	CE1	n/a	n/a		Q2UR69
comp5019_c0_seq2 len=3377 path=[1:0-605 6688:606-672 607:673-3376]	3377	n/a	CCD56843.1	NA	n/a	Botryotinia fuckeliana	CE1	n/a	n/a
comp9234_c0_seq2 len=3684 path=[3746:0-920 4667:921-2321 6068:2322-2799 6630:2800-3683]	3684	SMC_N|AAA_23	CAP71792.1	1434	Esterase_phd	Podospora anserina S mat+	CE1	NO	NO		B2B3V6
comp9234_c0_seq1 len=3768 path=[3746:0-920 4667:921-2321 6068:2322-2799 6546:2800-2883 6630:2884-3767]	3768	SMC_N|AAA_23	CAP71792.1	1434	Esterase_phd	Podospora anserina S mat+	CE1	NO	NO		B2B3V6
comp134179_c0_seq1 len=774 path=[1:0-773]	774	n/a	AEO61094.1	NA	n/a	Myceliophthora thermophila ATCC 42464	CE1	n/a	n/a
comp134179_c0_seq1 len=774 path=[1:0-773]	774	n/a	AEP33616.1	NA	n/a	Chrysosporium lucknowense	CE1	n/a	n/a
comp3793_c0_seq1 len=4575 path=[4553:0-4102 8656:4103-4574]	4575	CDP-OH_P_transf|Esterase	CAP65928.1	469	Esterase	Podospora anserina S mat+	CE1	NO	NO		B2APJ6
comp36069_c0_seq1 len=662 path=[640:0-661]	662	Esterase_phd	CBY01607.1	323	Esterase_phd	Leptosphaeria maculans v23.1.3	CE1	YES	NO		E5AEG8
comp5019_c0_seq1 len=3310 path=[1:0-605 607:606-3309]	3310	n/a	CCD56843.1	NA	n/a	Botryotinia fuckeliana	CE1	n/a	n/a
comp45894_c0_seq1 len=2025 path=[1:0-2024]	2025	n/a	AEP33617.1	NA	n/a	Chrysosporium lucknowense	CE1	n/a	n/a
comp45894_c0_seq1 len=2025 path=[1:0-2024]	2025	n/a	AEO57132.1	NA	n/a	Myceliophthora thermophila ATCC 42464	CE1	n/a	n/a
comp8753_c0_seq3 len=1620 path=[1:0-1499 1547:1500-1619]	1620	n/a	BAE55946.1	NA	n/a	Aspergillus oryzae RIB40	CE1	n/a	n/a		Q2UR69
comp10515_c0_seq1 len=3650 path=[1:0-3649]	3650	Esterase|RNA_pol_Rpb6	ABF39654.1	NA	n/a	Candidatus Koribacter versatilis Ellin345	CE1	n/a	n/a		Q1ITZ6
comp3110_c0_seq4 len=2124 path=[1:0-2093 5121:2094-2097 2099:2098-2123]	2124	n/a	XP_369676.1	NA	n/a	Magnaporthe grisea 70-15	CE1	n/a	n/a		G4N0V2
comp3110_c0_seq1 len=2123 path=[1:0-2093 5121:2094-2097 2982:2098-2122]	2123	n/a	XP_369676.1	NA	n/a	Magnaporthe grisea 70-15	CE1	n/a	n/a		G4N0V2
comp2245_c0_seq1 len=2743 path=[2721:0-1883 4605:1884-2742]	2743	Esterase_phd|MFS_1|Sugar_tr|MFS_1	CAE75726.1	305	Esterase_phd	Neurospora crassa OR74A	CE1	NO	NO	3.1.1.73	Q9HGR3Q9HGR3
comp831511_c0_seq1 len=213 path=[191:0-212]	213	n/a	CAP65856.1	NA	n/a	Podospora anserina S mat+	CE1	n/a	n/a		B2APD9
comp2245_c0_seq2 len=2794 path=[2721:0-1883 5464:1884-1934 4605:1935-2793]	2794	Esterase_phd|Sugar_tr|MFS_1|Sugar_tr|MFS_1	CAE75726.1	305	Esterase_phd	Neurospora crassa OR74A	CE1	NO	NO	3.1.1.73	Q9HGR3Q9HGR3
comp74055_c0_seq1 len=396 path=[1:0-395]	396	CBM_1	CCA72326.1	NA	n/a	Piriformospora indica	CE1|CBM1	n/a	n/a
comp8844_c0_seq1 len=1405 path=[1:0-523 525:524-582 682:583-618 718:619-1238 1402:1239-1404]	1405	n/a	CAC14144.1	366	Esterase_phd	Talaromyces funiculosus IMI134756	CE1|CBM1	n/a	NO	3.1.1.-	Q9HE18
comp10990_c0_seq1 len=3996 path=[3974:0-3995]	3996	CBM_1|Esterase_phd	CAC14144.1	366	Esterase_phd	Talaromyces funiculosus IMI134756	CE1|CBM1	NO	NO	3.1.1.-	Q9HE18
comp8844_c0_seq2 len=1310 path=[1:0-523 718:524-1143 1402:1144-1309]	1310	n/a	CAC14144.1	366	Esterase_phd	Talaromyces funiculosus IMI134756	CE1|CBM1	n/a	NO	3.1.1.-	Q9HE18
comp8844_c0_seq6 len=1374 path=[1:0-523 718:524-1143 1338:1144-1203 1398:1204-1207 1402:1208-1373]	1374	n/a	CAC14144.1	366	Esterase_phd	Talaromyces funiculosus IMI134756	CE1|CBM1	n/a	NO	3.1.1.-	Q9HE18
comp8844_c0_seq3 len=1469 path=[1:0-523 525:524-582 682:583-618 718:619-1238 1338:1239-1298 1398:1299-1302 1402:1303-1468]	1469	n/a	CAC14144.1	366	Esterase_phd	Talaromyces funiculosus IMI134756	CE1|CBM1	n/a	NO	3.1.1.-	Q9HE18
comp8011_c0_seq1 len=2746 path=[2724:0-1598 4323:1599-2090 4815:2091-2745]	2746	adh_short|CBM_1|Esterase_phd	AAM93261.1	395	Esterase_phd	Penicillium purpurogenum MYA-38	CE1|CBM1	NO	NO	3.1.1.72	Q8NJP6
comp8844_c0_seq5 len=1567 path=[1:0-523 525:524-582 584:583-680 682:681-716 718:717-1336 1338:1337-1396 1398:1397-1400 1402:1401-1566]	1567	n/a	CAC14144.1	366	Esterase_phd	Talaromyces funiculosus IMI134756	CE1|CBM1	n/a	NO	3.1.1.-	Q9HE18
comp41547_c0_seq1 len=636 path=[2:0-635]	636	n/a	CCA74360.1	377	Esterase_phd	Piriformospora indica	CE1|CBM1	n/a	NO
comp8844_c0_seq4 len=1503 path=[1:0-523 525:524-582 584:583-680 682:681-716 718:717-1336 1402:1337-1502]	1503	n/a	CAC14144.1	366	Esterase_phd	Talaromyces funiculosus IMI134756	CE1|CBM1	n/a	NO	3.1.1.-	Q9HE18
comp8263_c0_seq5 len=4606 path=[4975:0-3614 8590:3615-3687 8663:3688-4333 9652:4334-4442 9809:4443-4605]	4606	COesterase|MFS_1	NP_000656.1	628	COesterase|AChE_tetra	Homo sapiens	CE10	NO	NO	3.1.1.7	P22303
comp8494_c0_seq2 len=5957 path=[1:0-2101 2103:2102-2707 2711:2708-3842 3846:3843-4159 4163:4160-4233 4237:4234-5945 5949:5946-5956]	5957	Peptidase_S9|DPPIV_N|DPPIV_N|HET	NP_593970.1	807	DPPIV_N|Peptidase_S9	Schizosaccharomyces pombe 972h-	CE10	NO	NO		O14073
comp9513_c0_seq2 len=3307 path=[1:0-29 31:30-106 108:107-439 441:440-1141 1143:1142-1418 1420:1419-1920 1922:1921-3306]	3307	MFS_1|TRI12|MFS_1|FMO-like|Pyr_redox_3	NP_051574.1	847	Abhydrolase_3|Pyr_redox_3	Deinococcus radiodurans R1	CE10	NO	NO		Q9RZT0
comp9557_c0_seq3 len=4180 path=[1:0-243 9355:244-263 420:264-782 1144:783-2054 2416:2055-2122 2484:2123-2186 2548:2187-4179]	4180	OmdA|COesterase|COesterase	NP_000656.1	628	COesterase|AChE_tetra	Homo sapiens	CE10	NO	NO	3.1.1.7	P22303
comp6308_c0_seq2 len=1762 path=[1:0-177 179:178-298 300:299-1176 1178:1177-1761]	1762	Abhydrolase_3	NP_631192.1	330	Abhydrolase_3	Streptomyces coelicolor A3(2)	CE10	YES	NO		Q9FC55
comp9182_c0_seq14 len=3585 path=[1:0-116 11556:117-159 118:160-986 11379:987-1078 945:1079-1530 1397:1531-2310 2272:2311-3584]	3585	COesterase|COesterase	NP_294138.1	520	COesterase	Deinococcus radiodurans R1	CE10	NO	NO		Q9RXA0
comp9213_c0_seq1 len=3303 path=[1:0-894 896:895-1517 1519:1518-3302]	3303	Abhydrolase_3|Abhydrolase_3	AAA02895.1	316	Abhydrolase_3	Acinetobacter calcoaceticus RAG-1	CE10	NO	NO		P18773
comp9601_c0_seq2 len=1760 path=[4514:0-647 5162:648-835 5350:836-863 9946:864-1759]	1760	Abhydrolase_3	NP_243672.1	335	Abhydrolase_3	Bacillus halodurans C-125	CE10	YES	NO		Q9K944
comp9601_c0_seq2 len=1760 path=[4514:0-647 5162:648-835 5350:836-863 9946:864-1759]	1760	Abhydrolase_3	AAG09918.1	290	Abhydrolase_3	Bacillus pumilus	CE10	YES	NO	3.1.1.-	Q9F6C1
comp8897_c0_seq3 len=772 path=[3995:0-22 1139:23-240 1357:241-771]	772	Abhydrolase_3	NP_519893.1	358	Abhydrolase_3	Ralstonia solanacearum GMI1000	CE10	YES	NO		Q8XYI6
comp6372_c0_seq2 len=3310 path=[6102:0-227 6330:228-3309]	3310	COesterase|Oxidored_FMN	AAL82802.1	546	COesterase	Enterobacter cloacae EM	CE10	NO	NO		Q8RLU0
comp8897_c0_seq4 len=1887 path=[1:0-1137 1139:1138-1355 1357:1356-1886]	1887	Abhydrolase_3	NP_519893.1	358	Abhydrolase_3	Ralstonia solanacearum GMI1000	CE10	YES	NO		Q8XYI6
comp8704_c0_seq3 len=8486 path=[8319:0-1249 9569:1250-5057 16693:5058-5202 13377:5203-5618 13793:5619-8485]	8486	Peptidase_S9|Abhydrolase_6|EAP30|Vps36_ESCRT-II	NP_127272.1	645	Peptidase_S9	Pyrococcus abyssi GE5	CE10	NO	NO	3.4.19.1	Q9UYB0
comp5756_c0_seq2 len=2677 path=[1:0-470 5195:471-538 472:539-1545 1479:1546-2676]	2677	LrgB|COesterase	CAC39209.1	705	COesterase	Musca domestica COOPER	CE10	NO	NO	3.1.1.7	Q95P20
comp9522_c1_seq6 len=2837 path=[6605:0-918 13402:919-1029 7524:1030-2752 9298:2753-2836]	2837	Pyr_redox_3	NP_051574.1	847	Abhydrolase_3|Pyr_redox_3	Deinococcus radiodurans R1	CE10	NO	NO		Q9RZT0
comp9557_c0_seq2 len=4476 path=[1:0-243 9355:244-263 265:264-384 386:385-418 420:419-937 939:938-1142 1144:1143-2414 2416:2415-2482 2548:2483-4475]	4476	OmdA|COesterase	CAB93516.1	499	COesterase	Bacillus sp. BP-7	CE10	NO	NO	3.1.1.1	Q9L378
comp9522_c1_seq4 len=2726 path=[6605:0-918 7524:919-2641 9298:2642-2725]	2726	Pyr_redox_3	NP_051574.1	847	Abhydrolase_3|Pyr_redox_3	Deinococcus radiodurans R1	CE10	NO	NO		Q9RZT0
comp6994_c1_seq1 len=1964 path=[4016:0-534 4551:535-646 4663:647-1963]	1964	Abhydrolase_3	NP_518560.1	331	Abhydrolase_3	Ralstonia solanacearum GMI1000	CE10	YES	NO		Q8Y297
comp101224_c0_seq1 len=412 path=[390:0-411]	412	Abhydrolase_3	NP_343858.1	265	Abhydrolase_3	Sulfolobus solfataricus P2	CE10	YES	NO		Q97VU2
comp13457_c0_seq1 len=1400 path=[1378:0-1399]	1400	DUF2424|Abhydrolase_3	AAG10029.1	313	Abhydrolase_3	Acinetobacter sp. SE19	CE10	NO	NO	3.1.1.-	Q9F7D7
comp355_c0_seq1 len=719 path=[1:0-45 47:46-718]	719	Pyr_redox_3	NP_051574.1	847	Abhydrolase_3|Pyr_redox_3	Deinococcus radiodurans R1	CE10	NO	YES		Q9RZT0
comp6308_c0_seq1 len=1728 path=[1:0-177 300:178-1055 3612:1056-1142 1178:1143-1727]	1728	Abhydrolase_3	NP_298542.1	339	Abhydrolase_3	Xylella fastidiosa 9a5c	CE10	YES	NO		Q9PDX6
comp9048_c0_seq1 len=2192 path=[4:0-1776 2234:1777-1857 2315:1858-2191]	2192	Pyr_redox_3|FMO-like	NP_051574.1	847	Abhydrolase_3|Pyr_redox_3	Deinococcus radiodurans R1	CE10	NO	NO		Q9RZT0
comp9182_c0_seq4 len=3619 path=[1:0-116 118:117-943 11379:944-1035 945:1036-1487 11065:1488-1564 1397:1565-2344 2272:2345-3618]	3619	COesterase|COesterase	NP_294138.1	520	COesterase	Deinococcus radiodurans R1	CE10	NO	NO		Q9RXA0
comp7588_c0_seq2 len=9027 path=[1:0-1899 1901:1900-2727 15970:2728-3757 2729:3758-9026]	9027	PDEase_II|PDEase_II|Flavin_Reduct|COesterase	AAA81915.1	502	COesterase	Bacillus subtilis NRRL B8079	CE10	NO	NO	3.1.1.-	P37967
comp9557_c0_seq8 len=4116 path=[1:0-243 9355:244-263 420:264-782 1144:783-2054 2416:2055-2122 2548:2123-4115]	4116	OmdA|COesterase	CAB93516.1	499	COesterase	Bacillus sp. BP-7	CE10	NO	NO	3.1.1.1	Q9L378
comp9159_c0_seq7 len=4345 path=[10778:0-108 6275:109-326 10909:327-431 6493:432-1591 7653:1592-2118 8180:2119-3003 9065:3004-4344]	4345	Abhydrolase_6|Peptidase_S9	NP_127272.1	645	Peptidase_S9	Pyrococcus abyssi GE5	CE10	NO	NO	3.4.19.1	Q9UYB0
comp8734_c0_seq6 len=5572 path=[5493:0-87 5581:88-1613 11154:1614-1670 7107:1671-1797 7234:1798-1854 7291:1855-5571]	5572	dCMP_cyt_deam_1|Fructosamin_kin|COesterase|Abhydrolase_3	AAC08995.1	624	COesterase|AChE_tetra	Felis catus	CE10	NO	NO	3.1.1.7	O62763
comp11780_c0_seq1 len=5113 path=[1:0-5112]	5113	Peptidase_S9|DPPIV_N	NP_593970.1	807	DPPIV_N|Peptidase_S9	Schizosaccharomyces pombe 972h-	CE10	NO	NO		O14073
comp279471_c0_seq1 len=632 path=[1:0-631]	632	COesterase	NP_629218.1	511	COesterase	Streptomyces coelicolor A3(2)	CE10	YES	YES		Q9ADE0
comp321766_c0_seq1 len=335 path=[1:0-334]	335	COesterase	NP_524261.1	586	COesterase	Drosophila melanogaster	CE10	YES	NO		Q9VIB5
comp8704_c0_seq1 len=8593 path=[8319:0-1249 17230:1250-1356 9569:1357-5164 16693:5165-5309 13377:5310-5725 13793:5726-8592]	8593	Peptidase_S9|EAP30|Vps36_ESCRT-II	NP_127272.1	645	Peptidase_S9	Pyrococcus abyssi GE5	CE10	NO	NO	3.4.19.1	Q9UYB0
comp4501_c0_seq2 len=4124 path=[4013:0-2952 8046:2953-3041 6966:3042-4123]	4124	tRNA-synt_2b|HGTP_anticodon|COesterase|COesterase	CAC51386.1	497	COesterase	Bacillus licheniformis DSM 12369	CE10	NO	NO	3.1.1.1	Q93LA4
comp8849_c0_seq3 len=6254 path=[6232:0-2290 8523:2291-2423 8656:2424-2504 8737:2505-2650 8883:2651-6253]	6254	Abhydrolase_3	CAB91679.1	509	Abhydrolase_3	Neurospora crassa	CE10	YES	NO		Q9P5L8
comp8263_c0_seq6 len=4924 path=[4975:0-3614 8663:3615-4260 9309:4261-4603 9652:4604-4712 9761:4713-4760 9809:4761-4923]	4924	COesterase|MFS_1	NP_000656.1	628	COesterase|AChE_tetra	Homo sapiens	CE10	NO	NO	3.1.1.7	P22303
comp8527_c0_seq4 len=2324 path=[2247:0-1465 4592:1466-1520 4933:1521-1521 3714:1522-1571 3764:1572-1653 3846:1654-2323]	2324	COesterase|COesterase	CAC37792.1	616	COesterase|AChE_tetra	Gallus gallus	CE10	NO	NO	3.1.1.8	Q90ZK8
comp8494_c0_seq1 len=5883 path=[1:0-2101 2103:2102-2707 2711:2708-3842 3846:3843-4159 4237:4160-5871 5949:5872-5882]	5883	Peptidase_S9|DPPIV_N|DPPIV_N|HET	NP_593970.1	807	DPPIV_N|Peptidase_S9	Schizosaccharomyces pombe 972h-	CE10	NO	NO		O14073
comp197771_c0_seq1 len=963 path=[941:0-962]	963	n/a	NP_051574.1	847	Abhydrolase_3|Pyr_redox_3	Deinococcus radiodurans R1	CE10	n/a	YES		Q9RZT0
comp9513_c0_seq3 len=3381 path=[1:0-29 31:30-106 108:107-439 441:440-1141 1143:1142-1418 6689:1419-1492 1420:1493-1994 1922:1995-3380]	3381	MFS_1|TRI12|MFS_1|FMO-like|Pyr_redox_3	NP_051574.1	847	Abhydrolase_3|Pyr_redox_3	Deinococcus radiodurans R1	CE10	NO	NO		Q9RZT0
comp9159_c0_seq8 len=5214 path=[5192:0-1082 6275:1083-1300 6493:1301-2460 7653:2461-2987 8180:2988-3872 9065:3873-5213]	5214	Abhydrolase_6|Peptidase_S9	NP_127272.1	645	Peptidase_S9	Pyrococcus abyssi GE5	CE10	NO	NO	3.4.19.1	Q9UYB0
comp8734_c0_seq3 len=5515 path=[5493:0-87 5581:88-1613 7107:1614-1740 7234:1741-1797 7291:1798-5514]	5515	dCMP_cyt_deam_1|Fructosamin_kin|COesterase|Abhydrolase_3	AAC08995.1	624	COesterase|AChE_tetra	Felis catus	CE10	NO	NO	3.1.1.7	O62763
comp9601_c0_seq3 len=4008 path=[10819:0-307 5350:308-335 5378:336-1167 6210:1168-1210 6253:1211-1235 6278:1236-4007]	4008	Abhydrolase_3	AAG09918.1	290	Abhydrolase_3	Bacillus pumilus	CE10	YES	NO	3.1.1.-	Q9F6C1
comp7255_c0_seq2 len=2147 path=[2379:0-662 3296:663-1483 4117:1484-2146]	2147	Abhydrolase_3|DUF2424	NP_518560.1	331	Abhydrolase_3	Ralstonia solanacearum GMI1000	CE10	NO	NO		Q8Y297
comp9557_c0_seq5 len=4540 path=[1:0-243 9355:244-263 265:264-384 386:385-418 420:419-937 939:938-1142 1144:1143-2414 2416:2415-2482 2484:2483-2546 2548:2547-4539]	4540	OmdA|COesterase|COesterase	NP_000656.1	628	COesterase|AChE_tetra	Homo sapiens	CE10	NO	NO	3.1.1.7	P22303
comp9557_c0_seq4 len=4385 path=[1:0-243 9355:244-263 420:264-782 939:783-987 1144:988-2259 2416:2260-2327 2484:2328-2391 2548:2392-4384]	4385	OmdA|COesterase|COesterase	NP_000656.1	628	COesterase|AChE_tetra	Homo sapiens	CE10	NO	NO	3.1.1.7	P22303
comp9182_c0_seq9 len=5541 path=[1:0-116 118:117-943 11379:944-1035 945:1036-1487 1397:1488-2267 2272:2268-3541 3546:3542-5540]	5541	COesterase|COesterase|ATP_bind_4	NP_294138.1	520	COesterase	Deinococcus radiodurans R1	CE10	NO	NO		Q9RXA0
comp7066_c0_seq1 len=7205 path=[7107:0-1246 14236:1247-1320 14310:1321-1322 8354:1323-7204]	7205	Abhydrolase_3|COesterase	NP_000656.1	628	COesterase|AChE_tetra	Homo sapiens	CE10	NO	NO	3.1.1.7	P22303
comp8527_c0_seq2 len=1604 path=[2247:0-1465 4592:1466-1520 4933:1521-1521 3764:1522-1603]	1604	COesterase	CAC37792.1	616	COesterase|AChE_tetra	Gallus gallus	CE10	NO	NO	3.1.1.8	Q90ZK8
comp9100_c0_seq4 len=1864 path=[6027:0-85 3967:86-536 5687:537-592 4418:593-733 5864:734-810 4559:811-1863]	1864	COesterase	NP_296345.1	554	COesterase	Deinococcus radiodurans R1	CE10	YES	NO		Q9RR71
comp8527_c0_seq3 len=1688 path=[2247:0-1465 4933:1466-1466 3714:1467-1516 3764:1517-1598 4759:1599-1687]	1688	COesterase	CAC37792.1	616	COesterase|AChE_tetra	Gallus gallus	CE10	NO	NO	3.1.1.8	Q90ZK8
comp5756_c0_seq3 len=2609 path=[1:0-470 472:471-1477 1479:1478-2608]	2609	LrgB|COesterase	CAC39209.1	705	COesterase	Musca domestica COOPER	CE10	NO	NO	3.1.1.7	Q95P20
comp8263_c0_seq2 len=4533 path=[4975:0-3614 8663:3615-4260 9652:4261-4369 9809:4370-4532]	4533	COesterase|MFS_1	NP_000656.1	628	COesterase|AChE_tetra	Homo sapiens	CE10	NO	NO	3.1.1.7	P22303
comp8263_c0_seq1 len=4654 path=[4975:0-3614 8590:3615-3687 8663:3688-4333 9652:4334-4442 9761:4443-4490 9809:4491-4653]	4654	COesterase|MFS_1	NP_000656.1	628	COesterase|AChE_tetra	Homo sapiens	CE10	NO	NO	3.1.1.7	P22303
comp105411_c0_seq1 len=371 path=[349:0-370]	371	Abhydrolase_3	NP_518560.1	331	Abhydrolase_3	Ralstonia solanacearum GMI1000	CE10	YES	YES		Q8Y297
comp9522_c1_seq3 len=3700 path=[6605:0-918 13402:919-1029 7524:1030-2752 9247:2753-2803 9298:2804-2887 9382:2888-2963 9458:2964-3699]	3700	Pyr_redox_3	NP_051574.1	847	Abhydrolase_3|Pyr_redox_3	Deinococcus radiodurans R1	CE10	NO	NO		Q9RZT0
comp9100_c0_seq5 len=1787 path=[6027:0-85 3967:86-536 5687:537-592 4418:593-733 4559:734-1786]	1787	COesterase|COesterase	NP_296345.1	554	COesterase	Deinococcus radiodurans R1	CE10	NO	NO		Q9RR71
comp8704_c0_seq4 len=8448 path=[8319:0-1249 17230:1250-1356 9569:1357-5164 13377:5165-5580 13793:5581-8447]	8448	Peptidase_S9|EAP30|Vps36_ESCRT-II	NP_127272.1	645	Peptidase_S9	Pyrococcus abyssi GE5	CE10	NO	NO	3.4.19.1	Q9UYB0
comp7255_c0_seq1 len=2401 path=[2379:0-662 3042:663-916 3296:917-1737 4117:1738-2400]	2401	Abhydrolase_3|DUF2424	NP_518560.1	331	Abhydrolase_3	Ralstonia solanacearum GMI1000	CE10	NO	NO		Q8Y297
comp9100_c0_seq8 len=2950 path=[2795:0-1171 3967:1172-1622 5687:1623-1678 4418:1679-1819 5864:1820-1896 4559:1897-2949]	2950	COesterase	NP_296345.1	554	COesterase	Deinococcus radiodurans R1	CE10	YES	NO		Q9RR71
comp3531_c0_seq1 len=6143 path=[6121:0-6142]	6143	Phytase-like|COesterase	AAA81915.1	502	COesterase	Bacillus subtilis NRRL B8079	CE10	NO	NO	3.1.1.-	P37967
comp4477_c0_seq1 len=6379 path=[6357:0-203 6561:204-6378]	6379	tRNA-synt_2|Abhydrolase_3	NP_243672.1	335	Abhydrolase_3	Bacillus halodurans C-125	CE10	NO	NO		Q9K944
comp9182_c0_seq3 len=5713 path=[1:0-116 118:117-943 11379:944-1035 945:1036-1487 11065:1488-1564 1397:1565-2344 2177:2345-2439 2272:2440-3713 3546:3714-5712]	5713	COesterase|COesterase|ATP_bind_4	NP_294138.1	520	COesterase	Deinococcus radiodurans R1	CE10	NO	NO		Q9RXA0
comp11011_c0_seq1 len=2722 path=[2700:0-2721]	2722	Abhydrolase_3	AAG09918.1	290	Abhydrolase_3	Bacillus pumilus	CE10	YES	NO	3.1.1.-	Q9F6C1
comp6788_c0_seq2 len=2031 path=[1:0-1313 1315:1314-1335 3909:1336-1400 1337:1401-2030]	2031	Pyr_redox_2|Pyr_redox_3|FMO-like|K_oxygenase	NP_051574.1	847	Abhydrolase_3|Pyr_redox_3	Deinococcus radiodurans R1	CE10	NO	NO		Q9RZT0
comp2701_c0_seq2 len=1311 path=[2543:0-19 1275:20-1310]	1311	Abhydrolase_3	NP_519893.1	358	Abhydrolase_3	Ralstonia solanacearum GMI1000	CE10	YES	NO		Q8XYI6
comp9100_c0_seq6 len=2873 path=[2795:0-1171 3967:1172-1622 5687:1623-1678 4418:1679-1819 4559:1820-2872]	2873	COesterase|COesterase	NP_296345.1	554	COesterase	Deinococcus radiodurans R1	CE10	NO	NO		Q9RR71
comp9182_c0_seq16 len=5664 path=[1:0-116 11556:117-159 118:160-986 945:987-1438 11065:1439-1515 1397:1516-2295 2177:2296-2390 2272:2391-3664 3546:3665-5663]	5664	COesterase|ATP_bind_4	AAA81915.1	502	COesterase	Bacillus subtilis NRRL B8079	CE10	NO	NO	3.1.1.-	P37967
comp65520_c0_seq1 len=216 path=[1:0-215]	216	COesterase	AAG34705.1	553	COesterase	Dictyocaulus viviparus	CE10	YES	NO	3.1.1.7	Q9GPL0
comp5186_c0_seq1 len=3994 path=[3972:0-3292 7265:3293-3993]	3994	Abhydrolase_3	NP_594994.1	355	Abhydrolase_3	Schizosaccharomyces pombe 972h-	CE10	YES	NO		Q9US38
comp9159_c0_seq10 len=4240 path=[10778:0-108 6275:109-326 6493:327-1486 7653:1487-2013 8180:2014-2898 9065:2899-4239]	4240	Abhydrolase_6|Peptidase_S9	NP_127272.1	645	Peptidase_S9	Pyrococcus abyssi GE5	CE10	NO	NO	3.4.19.1	Q9UYB0
comp9159_c0_seq9 len=5319 path=[5192:0-1082 6275:1083-1300 10909:1301-1405 6493:1406-2565 7653:2566-3092 8180:3093-3977 9065:3978-5318]	5319	Abhydrolase_6|Peptidase_S9	NP_127272.1	645	Peptidase_S9	Pyrococcus abyssi GE5	CE10	NO	NO	3.4.19.1	Q9UYB0
comp9509_c0_seq1 len=1643 path=[2789:0-730 3520:731-862 3652:863-1121 3911:1122-1181 3971:1182-1586 6898:1587-1642]	1643	COesterase|Abhydrolase_3	NP_296345.1	554	COesterase	Deinococcus radiodurans R1	CE10	NO	NO		Q9RR71
comp3088_c0_seq1 len=2377 path=[2355:0-1414 3770:1415-2376]	2377	Abhydrolase_6|Abhydrolase_5	NP_442437.1	651	Peptidase_S9	Synechocystis sp. PCC 6803	CE10	NO	NO		Q55413
comp9182_c0_seq2 len=3662 path=[1:0-116 11556:117-159 118:160-986 11379:987-1078 945:1079-1530 11065:1531-1607 1397:1608-2387 2272:2388-3661]	3662	COesterase|COesterase	NP_294138.1	520	COesterase	Deinococcus radiodurans R1	CE10	NO	NO		Q9RXA0
comp9557_c0_seq6 len=4321 path=[1:0-243 9355:244-263 420:264-782 939:783-987 1144:988-2259 2416:2260-2327 2548:2328-4320]	4321	OmdA|COesterase	CAB93516.1	499	COesterase	Bacillus sp. BP-7	CE10	NO	NO	3.1.1.1	Q9L378
comp9100_c0_seq2 len=1731 path=[6027:0-85 3967:86-536 4418:537-677 4559:678-1730]	1731	COesterase	NP_296345.1	554	COesterase	Deinococcus radiodurans R1	CE10	YES	NO		Q9RR71
comp8734_c0_seq2 len=5622 path=[5493:0-87 5581:88-1613 11154:1614-1670 7107:1671-1797 7234:1798-1854 11081:1855-1904 7291:1905-5621]	5622	dCMP_cyt_deam_1|Fructosamin_kin|COesterase|Abhydrolase_3	AAC08995.1	624	COesterase|AChE_tetra	Felis catus	CE10	NO	NO	3.1.1.7	O62763
comp10279_c0_seq1 len=4661 path=[1:0-4660]	4661	COesterase|DUF2424|Abhydrolase_3|Abhydrolase_3|MRP-L27	NP_593817.1	592	Abhydrolase_3	Schizosaccharomyces pombe 972h-	CE10	NO	NO		O14158
comp9557_c0_seq1 len=4271 path=[1:0-243 9355:244-263 265:264-384 386:385-418 420:419-937 1144:938-2209 2416:2210-2277 2548:2278-4270]	4271	OmdA|COesterase	CAB93516.1	499	COesterase	Bacillus sp. BP-7	CE10	NO	NO	3.1.1.1	Q9L378
comp9513_c0_seq4 len=3377 path=[1:0-29 31:30-106 108:107-439 441:440-1141 6785:1142-1211 1143:1212-1488 1420:1489-1990 1922:1991-3376]	3377	MFS_1|TRI12|MFS_1|FMO-like|Pyr_redox_3	NP_051574.1	847	Abhydrolase_3|Pyr_redox_3	Deinococcus radiodurans R1	CE10	NO	NO		Q9RZT0
comp8734_c0_seq5 len=5681 path=[5493:0-87 5581:88-1613 11154:1614-1670 7107:1671-1797 11394:1798-1856 7234:1857-1913 11081:1914-1963 7291:1964-5680]	5681	dCMP_cyt_deam_1|Fructosamin_kin|COesterase|Abhydrolase_3	AAC08995.1	624	COesterase|AChE_tetra	Felis catus	CE10	NO	NO	3.1.1.7	O62763
comp6308_c0_seq4 len=1641 path=[1:0-177 300:178-1055 1178:1056-1640]	1641	Abhydrolase_3	NP_631192.1	330	Abhydrolase_3	Streptomyces coelicolor A3(2)	CE10	YES	NO		Q9FC55
comp9182_c0_seq10 len=3570 path=[1:0-116 11556:117-159 118:160-986 945:987-1438 11065:1439-1515 1397:1516-2295 2272:2296-3569]	3570	COesterase	AAA81915.1	502	COesterase	Bacillus subtilis NRRL B8079	CE10	YES	NO	3.1.1.-	P37967
comp6788_c0_seq1 len=1966 path=[1:0-1313 1315:1314-1335 1337:1336-1965]	1966	Pyr_redox_2|Pyr_redox_3|FMO-like|K_oxygenase	NP_051574.1	847	Abhydrolase_3|Pyr_redox_3	Deinococcus radiodurans R1	CE10	NO	NO		Q9RZT0
comp8263_c0_seq7 len=4997 path=[4975:0-3614 8590:3615-3687 8663:3688-4333 9309:4334-4676 9652:4677-4785 9761:4786-4833 9809:4834-4996]	4997	COesterase|MFS_1	NP_000656.1	628	COesterase|AChE_tetra	Homo sapiens	CE10	NO	NO	3.1.1.7	P22303
comp9522_c1_seq2 len=3589 path=[6605:0-918 7524:919-2641 9247:2642-2692 9298:2693-2776 9382:2777-2852 9458:2853-3588]	3589	Pyr_redox_3	NP_051574.1	847	Abhydrolase_3|Pyr_redox_3	Deinococcus radiodurans R1	CE10	NO	NO		Q9RZT0
comp10041_c0_seq1 len=4216 path=[4194:0-4215]	4216	NAD_binding_8|FMO-like	NP_051574.1	847	Abhydrolase_3|Pyr_redox_3	Deinococcus radiodurans R1	CE10	NO	NO		Q9RZT0
comp9182_c0_seq12 len=3757 path=[1:0-116 11556:117-159 118:160-986 11379:987-1078 945:1079-1530 11065:1531-1607 1397:1608-2387 2177:2388-2482 2272:2483-3756]	3757	COesterase|COesterase	NP_294138.1	520	COesterase	Deinococcus radiodurans R1	CE10	NO	NO		Q9RXA0
comp8263_c0_seq3 len=4949 path=[4975:0-3614 8590:3615-3687 8663:3688-4333 9309:4334-4676 9652:4677-4785 9809:4786-4948]	4949	COesterase|MFS_1	NP_000656.1	628	COesterase|AChE_tetra	Homo sapiens	CE10	NO	NO	3.1.1.7	P22303
comp8897_c0_seq1 len=848 path=[3995:0-22 1139:23-240 3847:241-316 1357:317-847]	848	Abhydrolase_3	NP_594994.1	355	Abhydrolase_3	Schizosaccharomyces pombe 972h-	CE10	YES	NO		Q9US38
comp9182_c0_seq6 len=5621 path=[1:0-116 118:117-943 945:944-1395 11065:1396-1472 1397:1473-2252 2177:2253-2347 2272:2348-3621 3546:3622-5620]	5621	COesterase|ATP_bind_4	AAA81915.1	502	COesterase	Bacillus subtilis NRRL B8079	CE10	NO	NO	3.1.1.-	P37967
comp90275_c0_seq1 len=1160 path=[1:0-1159]	1160	COesterase	AAA81915.1	502	COesterase	Bacillus subtilis NRRL B8079	CE10	YES	NO	3.1.1.-	P37967
comp37199_c0_seq1 len=2044 path=[1:0-2043]	2044	Pyr_redox_3	NP_051574.1	847	Abhydrolase_3|Pyr_redox_3	Deinococcus radiodurans R1	CE10	NO	NO		Q9RZT0
comp8849_c0_seq2 len=6108 path=[6232:0-2290 8523:2291-2423 8656:2424-2504 8883:2505-6107]	6108	Abhydrolase_3	CAB91679.1	509	Abhydrolase_3	Neurospora crassa	CE10	YES	NO		Q9P5L8
comp65837_c0_seq1 len=1203 path=[1181:0-1202]	1203	Abhydrolase_3	NP_593998.1	353	Abhydrolase_3	Schizosaccharomyces pombe 972h-	CE10	YES	NO		Q9HDX3
comp6308_c0_seq3 len=1849 path=[1:0-177 179:178-298 300:299-1176 3612:1177-1263 1178:1264-1848]	1849	Abhydrolase_3	NP_298542.1	339	Abhydrolase_3	Xylella fastidiosa 9a5c	CE10	YES	NO		Q9PDX6
comp9513_c0_seq1 len=3451 path=[1:0-29 31:30-106 108:107-439 441:440-1141 6785:1142-1211 1143:1212-1488 6689:1489-1562 1420:1563-2064 1922:2065-3450]	3451	MFS_1|TRI12|MFS_1|FMO-like|Pyr_redox_3	NP_051574.1	847	Abhydrolase_3|Pyr_redox_3	Deinococcus radiodurans R1	CE10	NO	NO		Q9RZT0
comp53232_c0_seq1 len=594 path=[572:0-593]	594	Abhydrolase_3	NP_593998.1	353	Abhydrolase_3	Schizosaccharomyces pombe 972h-	CE10	YES	NO		Q9HDX3
comp5691_c0_seq1 len=4708 path=[1:0-4707]	4708	Abhydrolase_3|MFS_1	NP_250788.1	323	Abhydrolase_3	Pseudomonas aeruginosa PAO1	CE10	NO	NO		Q9I217
comp9557_c0_seq7 len=4335 path=[1:0-243 9355:244-263 265:264-384 386:385-418 420:419-937 1144:938-2209 2416:2210-2277 2484:2278-2341 2548:2342-4334]	4335	OmdA|COesterase|COesterase	NP_000656.1	628	COesterase|AChE_tetra	Homo sapiens	CE10	NO	NO	3.1.1.7	P22303
comp9182_c0_seq7 len=5526 path=[1:0-116 118:117-943 945:944-1395 11065:1396-1472 1397:1473-2252 2272:2253-3526 3546:3527-5525]	5526	COesterase|ATP_bind_4	AAA81915.1	502	COesterase	Bacillus subtilis NRRL B8079	CE10	NO	NO	3.1.1.-	P37967
comp6372_c0_seq1 len=3369 path=[6102:0-227 6674:228-286 6330:287-3368]	3369	COesterase|Oxidored_FMN	NP_000656.1	628	COesterase|AChE_tetra	Homo sapiens	CE10	NO	NO	3.1.1.7	P22303
comp7588_c0_seq1 len=7997 path=[1:0-1899 1901:1900-2727 2729:2728-7996]	7997	PDEase_II|PDEase_II|Flavin_Reduct|COesterase	AAA81915.1	502	COesterase	Bacillus subtilis NRRL B8079	CE10	NO	NO	3.1.1.-	P37967
comp9182_c0_seq1 len=5679 path=[1:0-116 11556:117-159 118:160-986 11379:987-1078 945:1079-1530 1397:1531-2310 2177:2311-2405 2272:2406-3679 3546:3680-5678]	5679	COesterase|COesterase|ATP_bind_4	NP_294138.1	520	COesterase	Deinococcus radiodurans R1	CE10	NO	NO		Q9RXA0
comp17861_c0_seq1 len=1930 path=[1908:0-1929]	1930	Pyr_redox_3|K_oxygenase	NP_051574.1	847	Abhydrolase_3|Pyr_redox_3	Deinococcus radiodurans R1	CE10	NO	NO		Q9RZT0
comp2701_c0_seq1 len=1294 path=[1272:0-2 1275:3-1293]	1294	Abhydrolase_3	NP_519893.1	358	Abhydrolase_3	Ralstonia solanacearum GMI1000	CE10	YES	NO		Q8XYI6
comp5756_c0_seq1 len=1233 path=[5455:0-101 1479:102-1232]	1233	COesterase	CAC39209.1	705	COesterase	Musca domestica COOPER	CE10	YES	NO	3.1.1.7	Q95P20
comp5525_c0_seq1 len=1166 path=[1:0-1165]	1166	Pyr_redox_2|Pyr_redox_3	NP_051574.1	847	Abhydrolase_3|Pyr_redox_3	Deinococcus radiodurans R1	CE10	NO	NO		Q9RZT0
comp3929_c0_seq1 len=1453 path=[1:0-98 100:99-1452]	1453	Abhydrolase_3|COesterase	CAB93516.1	499	COesterase	Bacillus sp. BP-7	CE10	NO	NO	3.1.1.1	Q9L378
comp9100_c0_seq1 len=2817 path=[2795:0-1171 3967:1172-1622 4418:1623-1763 4559:1764-2816]	2817	COesterase	NP_571921.1	648	COesterase|COesterase|AChE_tetra	Danio rerio	CE10	NO	NO	3.1.1.7	B3DKL4Q9DDE3
comp9601_c0_seq1 len=3940 path=[10819:0-307 5350:308-335 5378:336-1167 6278:1168-3939]	3940	Abhydrolase_3	AAG09918.1	290	Abhydrolase_3	Bacillus pumilus	CE10	YES	NO	3.1.1.-	Q9F6C1
comp8734_c0_seq4 len=5565 path=[5493:0-87 5581:88-1613 7107:1614-1740 7234:1741-1797 11081:1798-1847 7291:1848-5564]	5565	dCMP_cyt_deam_1|Fructosamin_kin|COesterase|Abhydrolase_3	AAC08995.1	624	COesterase|AChE_tetra	Felis catus	CE10	NO	NO	3.1.1.7	O62763
comp39409_c0_seq1 len=1630 path=[1608:0-1629]	1630	COesterase	AAF61480.1	615	COesterase|AChE_tetra	Equus caballus	CE10	NO	NO	3.1.1.8	Q9N1N9
comp8263_c0_seq4 len=4581 path=[4975:0-3614 8663:3615-4260 9652:4261-4369 9761:4370-4417 9809:4418-4580]	4581	COesterase|MFS_1	NP_000656.1	628	COesterase|AChE_tetra	Homo sapiens	CE10	NO	NO	3.1.1.7	P22303
comp213580_c0_seq1 len=933 path=[1:0-932]	933	n/a	NP_051574.1	847	Abhydrolase_3|Pyr_redox_3	Deinococcus radiodurans R1	CE10	n/a	YES		Q9RZT0
comp9100_c0_seq3 len=2894 path=[2795:0-1171 3967:1172-1622 4418:1623-1763 5864:1764-1840 4559:1841-2893]	2894	COesterase	NP_296345.1	554	COesterase	Deinococcus radiodurans R1	CE10	YES	NO		Q9RR71
comp9522_c1_seq1 len=3624 path=[6605:0-918 13402:919-1029 7524:1030-2752 9247:2753-2803 9298:2804-2887 9458:2888-3623]	3624	Pyr_redox_3	NP_051574.1	847	Abhydrolase_3|Pyr_redox_3	Deinococcus radiodurans R1	CE10	NO	NO		Q9RZT0
comp8897_c0_seq2 len=1963 path=[1:0-1137 1139:1138-1355 3847:1356-1431 1357:1432-1962]	1963	Abhydrolase_3	NP_594994.1	355	Abhydrolase_3	Schizosaccharomyces pombe 972h-	CE10	YES	NO		Q9US38
comp9690_c0_seq1 len=5468 path=[1:0-425 427:426-587 589:588-859 861:860-4786 4789:4787-5467]	5468	COesterase|Ank_2|Ank_2|Ank_2|Ank_2|Ank_2	AAF61480.1	615	COesterase|AChE_tetra	Equus caballus	CE10	NO	NO	3.1.1.8	Q9N1N9
comp16292_c0_seq1 len=2386 path=[1:0-2385]	2386	Peptidase_S9	NP_280934.1	688	Peptidase_S9	Halobacterium sp. NRC-1 ATCC 700922	CE10	YES	NO		Q9HN07
comp8527_c0_seq5 len=1743 path=[2247:0-1465 4592:1466-1520 4933:1521-1521 3714:1522-1571 3764:1572-1653 4759:1654-1742]	1743	COesterase	CAC37792.1	616	COesterase|AChE_tetra	Gallus gallus	CE10	NO	NO	3.1.1.8	Q90ZK8
comp9182_c0_seq5 len=5636 path=[1:0-116 118:117-943 11379:944-1035 945:1036-1487 1397:1488-2267 2177:2268-2362 2272:2363-3636 3546:3637-5635]	5636	COesterase|COesterase|ATP_bind_4	NP_294138.1	520	COesterase	Deinococcus radiodurans R1	CE10	NO	NO		Q9RXA0
comp8263_c0_seq8 len=4876 path=[4975:0-3614 8663:3615-4260 9309:4261-4603 9652:4604-4712 9809:4713-4875]	4876	COesterase|MFS_1	NP_000656.1	628	COesterase|AChE_tetra	Homo sapiens	CE10	NO	NO	3.1.1.7	P22303
comp8527_c0_seq1 len=2269 path=[2247:0-1465 4933:1466-1466 3714:1467-1516 3764:1517-1598 3846:1599-2268]	2269	COesterase	NP_075231.1	611	COesterase|AChE_tetra	Rattus norvegicus	CE10	NO	NO	3.1.1.8	Q9JKC1
comp8527_c0_seq1 len=2269 path=[2247:0-1465 4933:1466-1466 3714:1467-1516 3764:1517-1598 3846:1599-2268]	2269	COesterase	CAC37792.1	616	COesterase|AChE_tetra	Gallus gallus	CE10	NO	NO	3.1.1.8	Q90ZK8
comp10516_c0_seq1 len=2645 path=[2623:0-2644]	2645	COesterase	NP_000656.1	628	COesterase|AChE_tetra	Homo sapiens	CE10	NO	NO	3.1.1.7	P22303
comp8734_c0_seq1 len=5624 path=[5493:0-87 5581:88-1613 7107:1614-1740 11394:1741-1799 7234:1800-1856 11081:1857-1906 7291:1907-5623]	5624	dCMP_cyt_deam_1|Fructosamin_kin|COesterase|Abhydrolase_3	AAC08995.1	624	COesterase|AChE_tetra	Felis catus	CE10	NO	NO	3.1.1.7	O62763
comp5254_c0_seq1 len=7158 path=[7136:0-7157]	7158	COesterase	NP_000656.1	628	COesterase|AChE_tetra	Homo sapiens	CE10	NO	NO	3.1.1.7	P22303
comp7066_c0_seq2 len=7129 path=[7107:0-1246 8354:1247-7128]	7129	Abhydrolase_3|COesterase	NP_000656.1	628	COesterase|AChE_tetra	Homo sapiens	CE10	NO	NO	3.1.1.7	P22303
comp9522_c1_seq5 len=3513 path=[6605:0-918 7524:919-2641 9247:2642-2692 9298:2693-2776 9458:2777-3512]	3513	Pyr_redox_3	NP_051574.1	847	Abhydrolase_3|Pyr_redox_3	Deinococcus radiodurans R1	CE10	NO	NO		Q9RZT0
comp4501_c0_seq1 len=4035 path=[4013:0-2952 6966:2953-4034]	4035	tRNA-synt_2b|HGTP_anticodon|COesterase	BAB60696.1	578	COesterase	Canis lupus familiaris	CE10	NO	NO		Q95N05
comp26343_c0_seq1 len=1920 path=[1898:0-1919]	1920	Abhydrolase_3|COesterase	CAB93516.1	499	COesterase	Bacillus sp. BP-7	CE10	NO	NO	3.1.1.1	Q9L378
comp3658_c0_seq2 len=807 path=[785:0-530 1316:531-806]	807	FMO-like|Pyr_redox_3	NP_051574.1	847	Abhydrolase_3|Pyr_redox_3	Deinococcus radiodurans R1	CE10	NO	YES		Q9RZT0
comp7426_c0_seq2 len=2145 path=[1:0-587 589:588-674 676:675-2144]	2145	Abhydrolase_3|COesterase	AAC08995.1	624	COesterase|AChE_tetra	Felis catus	CE10	NO	NO	3.1.1.7	O62763
comp46048_c0_seq1 len=1405 path=[1:0-1404]	1405	Abhydrolase_3	NP_593998.1	353	Abhydrolase_3	Schizosaccharomyces pombe 972h-	CE10	YES	NO		Q9HDX3
comp9100_c0_seq7 len=1808 path=[6027:0-85 3967:86-536 4418:537-677 5864:678-754 4559:755-1807]	1808	COesterase	NP_296345.1	554	COesterase	Deinococcus radiodurans R1	CE10	YES	NO		Q9RR71
comp8704_c0_seq2 len=8341 path=[8319:0-1249 9569:1250-5057 13377:5058-5473 13793:5474-8340]	8341	Peptidase_S9|Abhydrolase_6|EAP30|Vps36_ESCRT-II	NP_127272.1	645	Peptidase_S9	Pyrococcus abyssi GE5	CE10	NO	NO	3.4.19.1	Q9UYB0
comp9735_c0_seq6 len=3774 path=[3951:0-42 8479:43-93 3994:94-2095 6144:2096-2129 8866:2130-2152 6303:2153-2393 6544:2394-2483 6634:2484-3773]	3774	DEAD|Helicase_C	CAL53384.1	1058	DEAD|Helicase_C|LpxC	Ostreococcus tauri OTTH0595	CE11	NO	NO		Q017M7
comp9541_c0_seq18 len=7263 path=[7494:0-564 8132:565-817 8385:818-911 8479:912-994 8562:995-1369 9178:1370-1504 15362:1505-1565 9313:1566-7262]	7263	MFS_1|TRI12|DEAD|Helicase_C	CAL53384.1	1058	DEAD|Helicase_C|LpxC	Ostreococcus tauri OTTH0595	CE11	NO	NO		Q017M7
comp9735_c0_seq14 len=2192 path=[3951:0-42 3994:43-2044 5996:2045-2165 6118:2166-2173 6126:2174-2191]	2192	DEAD|Helicase_C	CAL53384.1	1058	DEAD|Helicase_C|LpxC	Ostreococcus tauri OTTH0595	CE11	NO	NO		Q017M7
comp9325_c0_seq2 len=5496 path=[7875:0-267 8143:268-356 8232:357-500 8376:501-831 8707:832-4426 15770:4427-4552 12302:4553-5495]	5496	DEAD|Helicase_C	CAL53384.1	1058	DEAD|Helicase_C|LpxC	Ostreococcus tauri OTTH0595	CE11	NO	NO		Q017M7
comp9541_c0_seq6 len=7150 path=[7494:0-564 8059:565-627 8131:628-628 8132:629-881 8562:882-1256 9178:1257-1391 15362:1392-1452 9313:1453-7149]	7150	MFS_1|TRI12|DEAD|Helicase_C	CAL53384.1	1058	DEAD|Helicase_C|LpxC	Ostreococcus tauri OTTH0595	CE11	NO	NO		Q017M7
comp13742_c0_seq1 len=2610 path=[1:0-2609]	2610	DUF4217|Helicase_C|DEAD	CAL53384.1	1058	DEAD|Helicase_C|LpxC	Ostreococcus tauri OTTH0595	CE11	NO	NO		Q017M7
comp6253_c0_seq2 len=7411 path=[1:0-6853 6855:6854-7410]	7411	Helicase_C|DEAD	CAL53384.1	1058	DEAD|Helicase_C|LpxC	Ostreococcus tauri OTTH0595	CE11	NO	NO		Q017M7
comp5454_c0_seq1 len=2760 path=[1:0-358 367:359-2759]	2760	DEAD|Helicase_C	CAL53384.1	1058	DEAD|Helicase_C|LpxC	Ostreococcus tauri OTTH0595	CE11	NO	NO		Q017M7
comp11446_c0_seq1 len=2279 path=[2257:0-2278]	2279	DEAD|Helicase_C	CAL53384.1	1058	DEAD|Helicase_C|LpxC	Ostreococcus tauri OTTH0595	CE11	NO	NO		Q017M7
comp9325_c0_seq14 len=5335 path=[7875:0-267 8232:268-411 17041:412-465 8376:466-796 8707:797-4391 12302:4392-5334]	5335	DEAD|Helicase_C	CAL53384.1	1058	DEAD|Helicase_C|LpxC	Ostreococcus tauri OTTH0595	CE11	NO	NO		Q017M7
comp9325_c0_seq9 len=5484 path=[7875:0-267 8143:268-356 8232:357-500 17041:501-554 8376:555-885 17116:886-945 8707:946-4540 12302:4541-5483]	5484	DEAD|Helicase_C	CAL53384.1	1058	DEAD|Helicase_C|LpxC	Ostreococcus tauri OTTH0595	CE11	NO	NO		Q017M7
comp9735_c0_seq4 len=3741 path=[3951:0-42 3994:43-2044 6126:2045-2062 6144:2063-2096 8866:2097-2119 6303:2120-2360 6544:2361-2450 6634:2451-3740]	3741	DEAD|Helicase_C	CAL53384.1	1058	DEAD|Helicase_C|LpxC	Ostreococcus tauri OTTH0595	CE11	NO	NO		Q017M7
comp9561_c1_seq2 len=7702 path=[6043:0-2916 19815:2917-6668 23567:6669-6761 23660:6762-6783 23682:6784-6841 23740:6842-7701]	7702	DEAD|Helicase_C	CAL53384.1	1058	DEAD|Helicase_C|LpxC	Ostreococcus tauri OTTH0595	CE11	NO	NO		Q017M7
comp4934_c0_seq2 len=4542 path=[4520:0-2804 7325:2805-4541]	4542	Rft-1|Helicase_C|DEAD	CAL53384.1	1058	DEAD|Helicase_C|LpxC	Ostreococcus tauri OTTH0595	CE11	NO	NO		Q017M7
comp9325_c0_seq6 len=5550 path=[7875:0-267 8143:268-356 8232:357-500 17041:501-554 8376:555-885 8707:886-4480 15770:4481-4606 12302:4607-5549]	5550	DEAD|Helicase_C	CAL53384.1	1058	DEAD|Helicase_C|LpxC	Ostreococcus tauri OTTH0595	CE11	NO	NO		Q017M7
comp9735_c0_seq10 len=2659 path=[3951:0-42 8479:43-93 3994:94-2095 6126:2096-2113 6144:2114-2147 8866:2148-2170 6201:2171-2272 6303:2273-2513 8042:2514-2568 6544:2569-2658]	2659	DEAD|Helicase_C	CAL53384.1	1058	DEAD|Helicase_C|LpxC	Ostreococcus tauri OTTH0595	CE11	NO	NO		Q017M7
comp9541_c0_seq16 len=7504 path=[7494:0-564 8132:565-817 8385:818-911 8479:912-994 8562:995-1369 8937:1370-1610 9178:1611-1745 15362:1746-1806 9313:1807-7503]	7504	MFS_1|TRI12|DEAD|Helicase_C	CAL53384.1	1058	DEAD|Helicase_C|LpxC	Ostreococcus tauri OTTH0595	CE11	NO	NO		Q017M7
comp9735_c0_seq1 len=2488 path=[3951:0-42 3994:43-2044 6144:2045-2078 8866:2079-2101 6303:2102-2342 8042:2343-2397 6544:2398-2487]	2488	DEAD|Helicase_C	CAL53384.1	1058	DEAD|Helicase_C|LpxC	Ostreococcus tauri OTTH0595	CE11	NO	NO		Q017M7
comp9541_c0_seq23 len=7202 path=[7494:0-564 8132:565-817 8385:818-911 8479:912-994 8562:995-1369 9178:1370-1504 9313:1505-7201]	7202	MFS_1|TRI12|DEAD|Helicase_C	CAL53384.1	1058	DEAD|Helicase_C|LpxC	Ostreococcus tauri OTTH0595	CE11	NO	NO		Q017M7
comp9735_c0_seq19 len=3876 path=[3951:0-42 8479:43-93 3994:94-2095 6144:2096-2129 8866:2130-2152 6201:2153-2254 6303:2255-2495 6544:2496-2585 6634:2586-3875]	3876	DEAD|Helicase_C	CAL53384.1	1058	DEAD|Helicase_C|LpxC	Ostreococcus tauri OTTH0595	CE11	NO	NO		Q017M7
comp9541_c0_seq13 len=7347 path=[7494:0-564 8059:565-627 15095:628-699 8122:700-708 8131:709-709 8132:710-962 8385:963-1056 8479:1057-1139 8562:1140-1514 9178:1515-1649 9313:1650-7346]	7347	MFS_1|TRI12|DEAD|Helicase_C	CAL53384.1	1058	DEAD|Helicase_C|LpxC	Ostreococcus tauri OTTH0595	CE11	NO	NO		Q017M7
comp6253_c0_seq1 len=8050 path=[1:0-6853 15508:6854-7376 16031:7377-7492 6855:7493-8049]	8050	Helicase_C|DEAD	CAL53384.1	1058	DEAD|Helicase_C|LpxC	Ostreococcus tauri OTTH0595	CE11	NO	NO		Q017M7
comp9541_c0_seq2 len=7025 path=[7494:0-564 8132:565-817 8562:818-1192 9178:1193-1327 9313:1328-7024]	7025	MFS_1|TRI12|DEAD|Helicase_C	CAL53384.1	1058	DEAD|Helicase_C|LpxC	Ostreococcus tauri OTTH0595	CE11	NO	NO		Q017M7
comp9561_c1_seq1 len=7808 path=[6043:0-2916 19815:2917-6668 23567:6669-6761 26606:6762-6867 23660:6868-6889 23682:6890-6947 23740:6948-7807]	7808	DEAD|Helicase_C	CAL53384.1	1058	DEAD|Helicase_C|LpxC	Ostreococcus tauri OTTH0595	CE11	NO	NO		Q017M7
comp9735_c0_seq16 len=2506 path=[3951:0-42 3994:43-2044 6126:2045-2062 6144:2063-2096 8866:2097-2119 6303:2120-2360 8042:2361-2415 6544:2416-2505]	2506	DEAD|Helicase_C	CAL53384.1	1058	DEAD|Helicase_C|LpxC	Ostreococcus tauri OTTH0595	CE11	NO	NO		Q017M7
comp9541_c0_seq12 len=7327 path=[7494:0-564 8132:565-817 8562:818-1192 8937:1193-1433 9178:1434-1568 15362:1569-1629 9313:1630-7326]	7327	MFS_1|TRI12|DEAD|Helicase_C	CAL53384.1	1058	DEAD|Helicase_C|LpxC	Ostreococcus tauri OTTH0595	CE11	NO	NO		Q017M7
comp9325_c0_seq12 len=5395 path=[7875:0-267 8232:268-411 17041:412-465 8376:466-796 17116:797-856 8707:857-4451 12302:4452-5394]	5395	DEAD|Helicase_C	CAL53384.1	1058	DEAD|Helicase_C|LpxC	Ostreococcus tauri OTTH0595	CE11	NO	NO		Q017M7
comp9325_c0_seq15 len=5281 path=[7875:0-267 8232:268-411 8376:412-742 8707:743-4337 12302:4338-5280]	5281	DEAD|Helicase_C	CAL53384.1	1058	DEAD|Helicase_C|LpxC	Ostreococcus tauri OTTH0595	CE11	NO	NO		Q017M7
comp9735_c0_seq7 len=2243 path=[3951:0-42 8479:43-93 3994:94-2095 5996:2096-2216 6118:2217-2224 6126:2225-2242]	2243	DEAD|Helicase_C	CAL53384.1	1058	DEAD|Helicase_C|LpxC	Ostreococcus tauri OTTH0595	CE11	NO	NO		Q017M7
comp9325_c0_seq3 len=5610 path=[7875:0-267 8143:268-356 8232:357-500 17041:501-554 8376:555-885 17116:886-945 8707:946-4540 15770:4541-4666 12302:4667-5609]	5610	DEAD|Helicase_C	CAL53384.1	1058	DEAD|Helicase_C|LpxC	Ostreococcus tauri OTTH0595	CE11	NO	NO		Q017M7
comp9541_c0_seq22 len=7266 path=[7494:0-564 8059:565-627 8131:628-628 8132:629-881 8385:882-975 8479:976-1058 8562:1059-1433 9178:1434-1568 9313:1569-7265]	7266	MFS_1|TRI12|DEAD|Helicase_C	CAL53384.1	1058	DEAD|Helicase_C|LpxC	Ostreococcus tauri OTTH0595	CE11	NO	NO		Q017M7
comp4934_c0_seq1 len=1867 path=[9169:0-129 7325:130-1866]	1867	Helicase_C|DEAD	CAL53384.1	1058	DEAD|Helicase_C|LpxC	Ostreococcus tauri OTTH0595	CE11	NO	NO		Q017M7
comp3549_c0_seq1 len=4421 path=[4399:0-4420]	4421	DUF4217|Helicase_C|DEAD	CAL53384.1	1058	DEAD|Helicase_C|LpxC	Ostreococcus tauri OTTH0595	CE11	NO	NO		Q017M7
comp9541_c0_seq11 len=7266 path=[7494:0-564 8132:565-817 8562:818-1192 8937:1193-1433 9178:1434-1568 9313:1569-7265]	7266	MFS_1|TRI12|DEAD|Helicase_C	CAL53384.1	1058	DEAD|Helicase_C|LpxC	Ostreococcus tauri OTTH0595	CE11	NO	NO		Q017M7
comp9541_c0_seq15 len=7649 path=[7494:0-564 8059:565-627 15095:628-699 8122:700-708 8131:709-709 8132:710-962 8385:963-1056 8479:1057-1139 8562:1140-1514 8937:1515-1755 9178:1756-1890 15362:1891-1951 9313:1952-7648]	7649	MFS_1|TRI12|DEAD|Helicase_C	CAL53384.1	1058	DEAD|Helicase_C|LpxC	Ostreococcus tauri OTTH0595	CE11	NO	NO		Q017M7
comp9325_c0_seq11 len=5370 path=[7875:0-267 8143:268-356 8232:357-500 8376:501-831 8707:832-4426 12302:4427-5369]	5370	DEAD|Helicase_C	CAL53384.1	1058	DEAD|Helicase_C|LpxC	Ostreococcus tauri OTTH0595	CE11	NO	NO		Q017M7
comp9541_c0_seq1 len=7089 path=[7494:0-564 8059:565-627 8131:628-628 8132:629-881 8562:882-1256 9178:1257-1391 9313:1392-7088]	7089	MFS_1|TRI12|DEAD|Helicase_C	CAL53384.1	1058	DEAD|Helicase_C|LpxC	Ostreococcus tauri OTTH0595	CE11	NO	NO		Q017M7
comp9325_c0_seq7 len=5467 path=[7875:0-267 8232:268-411 8376:412-742 17116:743-802 8707:803-4397 15770:4398-4523 12302:4524-5466]	5467	DEAD|Helicase_C	CAL53384.1	1058	DEAD|Helicase_C|LpxC	Ostreococcus tauri OTTH0595	CE11	NO	NO		Q017M7
comp9541_c0_seq5 len=7472 path=[7494:0-564 8059:565-627 15095:628-699 8122:700-708 8131:709-709 8132:710-962 8562:963-1337 8937:1338-1578 9178:1579-1713 15362:1714-1774 9313:1775-7471]	7472	MFS_1|TRI12|DEAD|Helicase_C	CAL53384.1	1058	DEAD|Helicase_C|LpxC	Ostreococcus tauri OTTH0595	CE11	NO	NO		Q017M7
comp6022_c0_seq1 len=8878 path=[1:0-8641 8643:8642-8681 8683:8682-8877]	8878	Helicase_C|DEAD|Cation_ATPase_N|E1-E2_ATPase|Hydrolase	CAL53384.1	1058	DEAD|Helicase_C|LpxC	Ostreococcus tauri OTTH0595	CE11	NO	NO		Q017M7
comp9735_c0_seq17 len=3894 path=[3951:0-42 8479:43-93 3994:94-2095 6126:2096-2113 6144:2114-2147 8866:2148-2170 6201:2171-2272 6303:2273-2513 6544:2514-2603 6634:2604-3893]	3894	DEAD|Helicase_C	CAL53384.1	1058	DEAD|Helicase_C|LpxC	Ostreococcus tauri OTTH0595	CE11	NO	NO		Q017M7
comp9325_c0_seq13 len=5407 path=[7875:0-267 8232:268-411 8376:412-742 8707:743-4337 15770:4338-4463 12302:4464-5406]	5407	DEAD|Helicase_C	CAL53384.1	1058	DEAD|Helicase_C|LpxC	Ostreococcus tauri OTTH0595	CE11	NO	NO		Q017M7
comp9735_c0_seq2 len=3792 path=[3951:0-42 8479:43-93 3994:94-2095 6126:2096-2113 6144:2114-2147 8866:2148-2170 6303:2171-2411 6544:2412-2501 6634:2502-3791]	3792	DEAD|Helicase_C	CAL53384.1	1058	DEAD|Helicase_C|LpxC	Ostreococcus tauri OTTH0595	CE11	NO	NO		Q017M7
comp9735_c0_seq8 len=3843 path=[3951:0-42 3994:43-2044 6126:2045-2062 6144:2063-2096 8866:2097-2119 6201:2120-2221 6303:2222-2462 6544:2463-2552 6634:2553-3842]	3843	DEAD|Helicase_C	CAL53384.1	1058	DEAD|Helicase_C|LpxC	Ostreococcus tauri OTTH0595	CE11	NO	NO		Q017M7
comp9735_c0_seq11 len=2557 path=[3951:0-42 8479:43-93 3994:94-2095 6126:2096-2113 6144:2114-2147 8866:2148-2170 6303:2171-2411 8042:2412-2466 6544:2467-2556]	2557	DEAD|Helicase_C	CAL53384.1	1058	DEAD|Helicase_C|LpxC	Ostreococcus tauri OTTH0595	CE11	NO	NO		Q017M7
comp9541_c0_seq21 len=7507 path=[7494:0-564 8059:565-627 8131:628-628 8132:629-881 8385:882-975 8479:976-1058 8562:1059-1433 8937:1434-1674 9178:1675-1809 9313:1810-7506]	7507	MFS_1|TRI12|DEAD|Helicase_C	CAL53384.1	1058	DEAD|Helicase_C|LpxC	Ostreococcus tauri OTTH0595	CE11	NO	NO		Q017M7
comp9541_c0_seq20 len=7086 path=[7494:0-564 8132:565-817 8562:818-1192 9178:1193-1327 15362:1328-1388 9313:1389-7085]	7086	MFS_1|TRI12|DEAD|Helicase_C	CAL53384.1	1058	DEAD|Helicase_C|LpxC	Ostreococcus tauri OTTH0595	CE11	NO	NO		Q017M7
comp4187_c0_seq1 len=2974 path=[2952:0-2973]	2974	DEAD|Helicase_C|DUF4217	CAL53384.1	1058	DEAD|Helicase_C|LpxC	Ostreococcus tauri OTTH0595	CE11	NO	NO		Q017M7
comp9541_c0_seq4 len=7443 path=[7494:0-564 8132:565-817 8385:818-911 8479:912-994 8562:995-1369 8937:1370-1610 9178:1611-1745 9313:1746-7442]	7443	MFS_1|TRI12|DEAD|Helicase_C	CAL53384.1	1058	DEAD|Helicase_C|LpxC	Ostreococcus tauri OTTH0595	CE11	NO	NO		Q017M7
comp10886_c0_seq1 len=2857 path=[2835:0-2856]	2857	Helicase_C|DEAD	CAL53384.1	1058	DEAD|Helicase_C|LpxC	Ostreococcus tauri OTTH0595	CE11	NO	NO		Q017M7
comp9541_c0_seq10 len=7411 path=[7494:0-564 8059:565-627 15095:628-699 8122:700-708 8131:709-709 8132:710-962 8562:963-1337 8937:1338-1578 9178:1579-1713 9313:1714-7410]	7411	MFS_1|TRI12|DEAD|Helicase_C	CAL53384.1	1058	DEAD|Helicase_C|LpxC	Ostreococcus tauri OTTH0595	CE11	NO	NO		Q017M7
comp9325_c0_seq1 len=5461 path=[7875:0-267 8232:268-411 17041:412-465 8376:466-796 8707:797-4391 15770:4392-4517 12302:4518-5460]	5461	DEAD|Helicase_C	CAL53384.1	1058	DEAD|Helicase_C|LpxC	Ostreococcus tauri OTTH0595	CE11	NO	NO		Q017M7
comp9735_c0_seq9 len=3898 path=[3951:0-42 3994:43-2044 6126:2045-2062 6144:2063-2096 8866:2097-2119 6201:2120-2221 6303:2222-2462 8042:2463-2517 6544:2518-2607 6634:2608-3897]	3898	DEAD|Helicase_C	CAL53384.1	1058	DEAD|Helicase_C|LpxC	Ostreococcus tauri OTTH0595	CE11	NO	NO		Q017M7
comp5372_c0_seq1 len=4009 path=[5901:0-2123 28:2124-2150 54:2151-4008]	4009	DEAD|Helicase_C	CAL53384.1	1058	DEAD|Helicase_C|LpxC	Ostreococcus tauri OTTH0595	CE11	NO	NO		Q017M7
comp9541_c0_seq8 len=7408 path=[7494:0-564 8059:565-627 15095:628-699 8122:700-708 8131:709-709 8132:710-962 8385:963-1056 8479:1057-1139 8562:1140-1514 9178:1515-1649 15362:1650-1710 9313:1711-7407]	7408	MFS_1|TRI12|DEAD|Helicase_C	CAL53384.1	1058	DEAD|Helicase_C|LpxC	Ostreococcus tauri OTTH0595	CE11	NO	NO		Q017M7
comp9735_c0_seq12 len=3825 path=[3951:0-42 3994:43-2044 6144:2045-2078 8866:2079-2101 6201:2102-2203 6303:2204-2444 6544:2445-2534 6634:2535-3824]	3825	DEAD|Helicase_C	CAL53384.1	1058	DEAD|Helicase_C|LpxC	Ostreococcus tauri OTTH0595	CE11	NO	NO		Q017M7
comp9735_c0_seq3 len=3880 path=[3951:0-42 3994:43-2044 6144:2045-2078 8866:2079-2101 6201:2102-2203 6303:2204-2444 8042:2445-2499 6544:2500-2589 6634:2590-3879]	3880	DEAD|Helicase_C	CAL53384.1	1058	DEAD|Helicase_C|LpxC	Ostreococcus tauri OTTH0595	CE11	NO	NO		Q017M7
comp9325_c0_seq4 len=5341 path=[7875:0-267 8232:268-411 8376:412-742 17116:743-802 8707:803-4397 12302:4398-5340]	5341	DEAD|Helicase_C	CAL53384.1	1058	DEAD|Helicase_C|LpxC	Ostreococcus tauri OTTH0595	CE11	NO	NO		Q017M7
comp6295_c0_seq1 len=3388 path=[3366:0-3210 6847:3211-3215 6582:3216-3217 6584:3218-3387]	3388	DEAD|Helicase_C	CAL53384.1	1058	DEAD|Helicase_C|LpxC	Ostreococcus tauri OTTH0595	CE11	NO	NO		Q017M7
comp5808_c0_seq2 len=2651 path=[1:0-1963 1965:1964-2008 2010:2009-2650]	2651	DEAD|Helicase_C	CAL53384.1	1058	DEAD|Helicase_C|LpxC	Ostreococcus tauri OTTH0595	CE11	NO	NO		Q017M7
comp9325_c0_seq16 len=5424 path=[7875:0-267 8143:268-356 8232:357-500 17041:501-554 8376:555-885 8707:886-4480 12302:4481-5423]	5424	DEAD|Helicase_C	CAL53384.1	1058	DEAD|Helicase_C|LpxC	Ostreococcus tauri OTTH0595	CE11	NO	NO		Q017M7
comp9735_c0_seq5 len=3931 path=[3951:0-42 8479:43-93 3994:94-2095 6144:2096-2129 8866:2130-2152 6201:2153-2254 6303:2255-2495 8042:2496-2550 6544:2551-2640 6634:2641-3930]	3931	DEAD|Helicase_C	CAL53384.1	1058	DEAD|Helicase_C|LpxC	Ostreococcus tauri OTTH0595	CE11	NO	NO		Q017M7
comp12509_c0_seq1 len=2353 path=[1:0-2352]	2353	DEAD|Helicase_C	CAL53384.1	1058	DEAD|Helicase_C|LpxC	Ostreococcus tauri OTTH0595	CE11	NO	NO		Q017M7
comp9735_c0_seq18 len=3723 path=[3951:0-42 3994:43-2044 6144:2045-2078 8866:2079-2101 6303:2102-2342 6544:2343-2432 6634:2433-3722]	3723	DEAD|Helicase_C	CAL53384.1	1058	DEAD|Helicase_C|LpxC	Ostreococcus tauri OTTH0595	CE11	NO	NO		Q017M7
comp3833_c0_seq1 len=6902 path=[6880:0-6901]	6902	OPT|DBP10CT|Helicase_C|DEAD	CAL53384.1	1058	DEAD|Helicase_C|LpxC	Ostreococcus tauri OTTH0595	CE11	NO	NO		Q017M7
comp9325_c0_seq5 len=5430 path=[7875:0-267 8143:268-356 8232:357-500 8376:501-831 17116:832-891 8707:892-4486 12302:4487-5429]	5430	DEAD|Helicase_C	CAL53384.1	1058	DEAD|Helicase_C|LpxC	Ostreococcus tauri OTTH0595	CE11	NO	NO		Q017M7
comp9325_c0_seq10 len=5556 path=[7875:0-267 8143:268-356 8232:357-500 8376:501-831 17116:832-891 8707:892-4486 15770:4487-4612 12302:4613-5555]	5556	DEAD|Helicase_C	CAL53384.1	1058	DEAD|Helicase_C|LpxC	Ostreococcus tauri OTTH0595	CE11	NO	NO		Q017M7
comp4055_c0_seq1 len=2152 path=[1:0-31 33:32-2151]	2152	Helicase_C|DEAD	CAL53384.1	1058	DEAD|Helicase_C|LpxC	Ostreococcus tauri OTTH0595	CE11	NO	NO		Q017M7
comp11816_c0_seq1 len=2572 path=[1:0-2571]	2572	Helicase_C|DEAD	CAL53384.1	1058	DEAD|Helicase_C|LpxC	Ostreococcus tauri OTTH0595	CE11	NO	NO		Q017M7
comp9541_c0_seq19 len=7588 path=[7494:0-564 8059:565-627 15095:628-699 8122:700-708 8131:709-709 8132:710-962 8385:963-1056 8479:1057-1139 8562:1140-1514 8937:1515-1755 9178:1756-1890 9313:1891-7587]	7588	MFS_1|TRI12|DEAD|Helicase_C	CAL53384.1	1058	DEAD|Helicase_C|LpxC	Ostreococcus tauri OTTH0595	CE11	NO	NO		Q017M7
comp9541_c0_seq3 len=7391 path=[7494:0-564 8059:565-627 8131:628-628 8132:629-881 8562:882-1256 8937:1257-1497 9178:1498-1632 15362:1633-1693 9313:1694-7390]	7391	MFS_1|TRI12|DEAD|Helicase_C	CAL53384.1	1058	DEAD|Helicase_C|LpxC	Ostreococcus tauri OTTH0595	CE11	NO	NO		Q017M7
comp2995_c0_seq1 len=3139 path=[3117:0-3138]	3139	Helicase_C|DEAD	CAL53384.1	1058	DEAD|Helicase_C|LpxC	Ostreococcus tauri OTTH0595	CE11	NO	NO		Q017M7
comp2572_c0_seq1 len=5720 path=[1:0-1919 1921:1920-5719]	5720	DEAD|Helicase_C|DUF4217|DUF1772|Peroxidase_2	CAL53384.1	1058	DEAD|Helicase_C|LpxC	Ostreococcus tauri OTTH0595	CE11	NO	NO		Q017M7
comp9541_c0_seq9 len=7568 path=[7494:0-564 8059:565-627 8131:628-628 8132:629-881 8385:882-975 8479:976-1058 8562:1059-1433 8937:1434-1674 9178:1675-1809 15362:1810-1870 9313:1871-7567]	7568	MFS_1|TRI12|DEAD|Helicase_C	CAL53384.1	1058	DEAD|Helicase_C|LpxC	Ostreococcus tauri OTTH0595	CE11	NO	NO		Q017M7
comp9541_c0_seq7 len=7327 path=[7494:0-564 8059:565-627 8131:628-628 8132:629-881 8385:882-975 8479:976-1058 8562:1059-1433 9178:1434-1568 15362:1569-1629 9313:1630-7326]	7327	MFS_1|TRI12|DEAD|Helicase_C	CAL53384.1	1058	DEAD|Helicase_C|LpxC	Ostreococcus tauri OTTH0595	CE11	NO	NO		Q017M7
comp9735_c0_seq15 len=2539 path=[3951:0-42 8479:43-93 3994:94-2095 6144:2096-2129 8866:2130-2152 6303:2153-2393 8042:2394-2448 6544:2449-2538]	2539	DEAD|Helicase_C	CAL53384.1	1058	DEAD|Helicase_C|LpxC	Ostreococcus tauri OTTH0595	CE11	NO	NO		Q017M7
comp9561_c1_seq3 len=7644 path=[6043:0-2916 19815:2917-6668 23567:6669-6761 23660:6762-6783 23740:6784-7643]	7644	DEAD|Helicase_C	CAL53384.1	1058	DEAD|Helicase_C|LpxC	Ostreococcus tauri OTTH0595	CE11	NO	NO		Q017M7
comp9978_c0_seq1 len=3688 path=[3666:0-3687]	3688	DEAD|Helicase_C	CAL53384.1	1058	DEAD|Helicase_C|LpxC	Ostreococcus tauri OTTH0595	CE11	NO	NO		Q017M7
comp9325_c0_seq8 len=5521 path=[7875:0-267 8232:268-411 17041:412-465 8376:466-796 17116:797-856 8707:857-4451 15770:4452-4577 12302:4578-5520]	5521	DEAD|Helicase_C	CAL53384.1	1058	DEAD|Helicase_C|LpxC	Ostreococcus tauri OTTH0595	CE11	NO	NO		Q017M7
comp9541_c0_seq14 len=7330 path=[7494:0-564 8059:565-627 8131:628-628 8132:629-881 8562:882-1256 8937:1257-1497 9178:1498-1632 9313:1633-7329]	7330	MFS_1|TRI12|DEAD|Helicase_C	CAL53384.1	1058	DEAD|Helicase_C|LpxC	Ostreococcus tauri OTTH0595	CE11	NO	NO		Q017M7
comp5808_c0_seq1 len=2606 path=[1:0-1963 2010:1964-2605]	2606	DEAD|Helicase_C	CAL53384.1	1058	DEAD|Helicase_C|LpxC	Ostreococcus tauri OTTH0595	CE11	NO	NO		Q017M7
comp8583_c0_seq1 len=2794 path=[5938:0-106 234:107-2175 2303:2176-2546 2674:2547-2793]	2794	Helicase_C|DEAD	CAL53384.1	1058	DEAD|Helicase_C|LpxC	Ostreococcus tauri OTTH0595	CE11	NO	NO		Q017M7
comp41698_c0_seq1 len=1602 path=[1580:0-1601]	1602	Epimerase	CAP67203.1	NA	n/a	Podospora anserina S mat+	CE12	n/a	n/a		B2AS32
comp6087_c0_seq1 len=4327 path=[1:0-1765 1767:1766-3438 3440:3439-4326]	4327	n/a	AET61722.1	511	Peptidase_S9|Lipase_GDSL_2	Paenibacillus terrae HPL-003	CE12	n/a	NO
comp69258_c0_seq1 len=750 path=[728:0-749]	750	Lipase_GDSL_2	XP_367766.1	NA	n/a	Magnaporthe grisea 70-15	CE12	n/a	n/a		G4N3D2
comp6611_c0_seq1 len=3916 path=[5456:0-2564 8021:2565-3857 11042:3858-3893 11295:3894-3915]	3916	Lipase_GDSL_2|Opi1	BAE61201.1	273	Lipase_GDSL_2	Aspergillus oryzae RIB40	CE12	NO	NO		Q2UB64
comp3055_c0_seq1 len=1817 path=[1:0-500 502:501-1816]	1817	n/a	CAP67203.1	NA	n/a	Podospora anserina S mat+	CE12	n/a	n/a		B2AS32
comp6611_c0_seq2 len=5478 path=[5456:0-2564 8021:2565-3857 9314:3858-5477]	5478	Lipase_GDSL_2|Opi1	BAE61201.1	273	Lipase_GDSL_2	Aspergillus oryzae RIB40	CE12	NO	NO		Q2UB64
comp3639_c0_seq1 len=2124 path=[2102:0-1025 3128:1026-2123]	2124	NAD_binding_10|3Beta_HSD|NAD_binding_4	CAP67203.1	NA	n/a	Podospora anserina S mat+	CE12	n/a	n/a		B2AS32
comp66477_c0_seq1 len=449 path=[427:0-448]	449	n/a	XP_367766.1	NA	n/a	Magnaporthe grisea 70-15	CE12	n/a	n/a		G4N3D2
comp6611_c0_seq3 len=3943 path=[5456:0-2564 8021:2565-3857 11042:3858-3893 11078:3894-3942]	3943	Lipase_GDSL_2|Opi1	BAE61201.1	273	Lipase_GDSL_2	Aspergillus oryzae RIB40	CE12	NO	NO		Q2UB64
comp61235_c0_seq1 len=593 path=[1:0-592]	593	n/a	AEO68173.1	NA	n/a	Thielavia terrestris NRRL 8126	CE15	n/a	n/a
comp73574_c0_seq1 len=572 path=[550:0-571]	572	n/a	AEO68173.1	NA	n/a	Thielavia terrestris NRRL 8126	CE15	n/a	n/a
comp8339_c1_seq2 len=370 path=[1108:0-70 1179:71-146 1255:147-199 1308:200-369]	370	n/a	XP_360585.1	NA	n/a	Magnaporthe grisea 70-15	CE15	n/a	n/a		G4NAW0
comp8339_c1_seq1 len=547 path=[1944:0-300 1179:301-376 1308:377-546]	547	n/a	XP_360585.1	NA	n/a	Magnaporthe grisea 70-15	CE15	n/a	n/a		G4NAW0
comp5370_c0_seq1 len=1597 path=[1686:0-1568 3431:1569-1571 3258:1572-1596]	1597	n/a	CBY01773.1	NA	n/a	Leptosphaeria maculans v23.1.3	CE16	n/a	n/a		E5AEY4
comp8873_c0_seq4 len=2204 path=[2292:0-264 2667:265-1709 4112:1710-1787 4190:1788-2203]	2204	n/a	AEO70785.1	NA	n/a	Thielavia terrestris NRRL 8126	CE16	n/a	n/a
comp8873_c0_seq1 len=2314 path=[2292:0-264 2557:265-374 2667:375-1819 4112:1820-1897 4190:1898-2313]	2314	n/a	AEO70785.1	NA	n/a	Thielavia terrestris NRRL 8126	CE16	n/a	n/a
comp8873_c0_seq2 len=2236 path=[2292:0-264 2557:265-374 2667:375-1819 4190:1820-2235]	2236	n/a	AEO70785.1	NA	n/a	Thielavia terrestris NRRL 8126	CE16	n/a	n/a
comp8873_c0_seq3 len=2126 path=[2292:0-264 2667:265-1709 4190:1710-2125]	2126	n/a	AEO70785.1	NA	n/a	Thielavia terrestris NRRL 8126	CE16	n/a	n/a
comp196708_c0_seq1 len=494 path=[1:0-493]	494	n/a	CBY01773.1	NA	n/a	Leptosphaeria maculans v23.1.3	CE16	n/a	n/a		E5AEY4
comp4898_c0_seq1 len=1570 path=[1:0-241 243:242-1569]	1570	Lipase_GDSL|Lipase_GDSL_2	XP_362887.1	NA	n/a	Magnaporthe grisea 70-15	CE2	n/a	n/a		G4N5W8
comp4898_c0_seq2 len=1636 path=[1:0-241 3115:242-307 243:308-1635]	1636	Lipase_GDSL|Lipase_GDSL_2	XP_362887.1	NA	n/a	Magnaporthe grisea 70-15	CE2	n/a	n/a		G4N5W8
comp7976_c1_seq2 len=6949 path=[3504:0-6895 10505:6896-6948]	6949	Lipase_GDSL_2|Lipase_GDSL	CAP71774.1	295	Lipase_GDSL_2	Podospora anserina S mat+	CE3	NO	NO		B2B3T8
comp9585_c0_seq2 len=3639 path=[4365:0-286 9353:287-361 9264:362-383 4652:384-532 4801:533-836 5105:837-3396 8994:3397-3638]	3639	PDCD2_C	AEO54377.1	245	Lipase_GDSL_2	Myceliophthora thermophila ATCC 42464	CE3	NO	NO
comp7910_c0_seq3 len=1774 path=[1630:0-150 3636:151-159 1790:160-211 1842:212-212 1843:213-1039 3471:1040-1161 2670:1162-1773]	1774	n/a	AEO60969.1	313	Lipase_GDSL	Myceliophthora thermophila ATCC 42464	CE3	n/a	NO
comp10197_c0_seq1 len=2335 path=[1:0-2334]	2335	n/a	ADK54828.1	988	Lipase_GDSL_2	uncultured soil bacterium	CE3	n/a	NO		E2D2G4
comp33166_c0_seq1 len=1390 path=[1368:0-1389]	1390	Lipase_GDSL_2|Lipase_GDSL	XP_366258.1	NA	n/a	Magnaporthe grisea 70-15	CE3	n/a	n/a		G4MYF2
comp8990_c0_seq3 len=2317 path=[2319:0-1493 4660:1494-1518 3862:1519-1748 4092:1749-2316]	2317	Lipase_GDSL_2	AEO66483.1	274	Lipase_GDSL_2	Thielavia terrestris NRRL 8126	CE3	YES	NO
comp10053_c0_seq1 len=2230 path=[2208:0-2229]	2230	n/a	ADK54828.1	988	Lipase_GDSL_2	uncultured soil bacterium	CE3	n/a	NO		E2D2G4
comp8345_c0_seq3 len=3013 path=[3:0-915 966:916-998 1049:999-1462 1513:1463-3012]	3013	Glyco_hydro_7	CAP71774.1	295	Lipase_GDSL_2	Podospora anserina S mat+	CE3	NO	NO		B2B3T8
comp5852_c0_seq4 len=2041 path=[5597:0-105 5703:106-991 6589:992-2040]	2041	Lipase_GDSL_2|Lipase_GDSL	AEO66483.1	274	Lipase_GDSL_2	Thielavia terrestris NRRL 8126	CE3	NO	NO
comp9585_c0_seq6 len=4484 path=[4365:0-286 9353:287-361 9264:362-383 4652:384-532 4801:533-836 5105:837-3396 7665:3397-3931 8200:3932-4008 8277:4009-4483]	4484	PDCD2_C|Lipase_GDSL_2|CBM_1	AEO54377.1	245	Lipase_GDSL_2	Myceliophthora thermophila ATCC 42464	CE3	NO	NO
comp7976_c1_seq1 len=6949 path=[3504:0-6895 10400:6896-6948]	6949	Lipase_GDSL_2|Lipase_GDSL	CAP71774.1	295	Lipase_GDSL_2	Podospora anserina S mat+	CE3	NO	NO		B2B3T8
comp8345_c0_seq1 len=3119 path=[3:0-915 919:916-962 966:963-1045 6184:1046-1104 1049:1105-1568 1513:1569-3118]	3119	Glyco_hydro_7	CAP71774.1	295	Lipase_GDSL_2	Podospora anserina S mat+	CE3	NO	NO		B2B3T8
comp7221_c0_seq1 len=4738 path=[1:0-3122 9437:3123-3186 9647:3187-3201 3139:3202-3265 3203:3266-4737]	4738	n/a	ADK54828.1	988	Lipase_GDSL_2	uncultured soil bacterium	CE3	n/a	NO		E2D2G4
comp6605_c1_seq2 len=2118 path=[6733:0-355 890:356-2117]	2118	Lipase_GDSL_2	XP_323879.1	293	Lipase_GDSL_2	Neurospora crassa OR74A	CE3	YES	NO		Q7RY37
comp10998_c0_seq1 len=2887 path=[1:0-2886]	2887	Lipase_GDSL|Lipase_GDSL_2	CAP67115.1	412	Lipase_GDSL	Podospora anserina S mat+	CE3	NO	NO		B2ARU5
comp3386_c0_seq2 len=1928 path=[1906:0-1606 3513:1607-1927]	1928	Lipase_GDSL_2|Lipase_GDSL	AEO66483.1	274	Lipase_GDSL_2	Thielavia terrestris NRRL 8126	CE3	NO	NO
comp6605_c1_seq1 len=2651 path=[1:0-888 890:889-2650]	2651	Lipase_GDSL_2	XP_323879.1	293	Lipase_GDSL_2	Neurospora crassa OR74A	CE3	YES	NO		Q7RY37
comp9585_c0_seq5 len=4310 path=[4365:0-286 4652:287-435 4801:436-739 5105:740-3299 7665:3300-3834 8277:3835-4309]	4310	PDCD2_C|Lipase_GDSL_2|CBM_1	AEO54377.1	245	Lipase_GDSL_2	Myceliophthora thermophila ATCC 42464	CE3	NO	NO
comp5246_c0_seq2 len=5320 path=[5298:0-948 6247:949-1094 6393:1095-5319]	5320	n/a	ABA65775.1	1542	Lipase_GDSL|Lipase_GDSL_2	Aspergillus terreus	CE3	n/a	NO		Q9Y7C6
comp5852_c0_seq1 len=3746 path=[3808:0-1810 5703:1811-2696 6589:2697-3745]	3746	Lipase_GDSL_2|Lipase_GDSL	AEO66483.1	274	Lipase_GDSL_2	Thielavia terrestris NRRL 8126	CE3	NO	NO
comp7910_c0_seq4 len=1652 path=[1630:0-150 3636:151-159 1790:160-211 1842:212-212 1843:213-1039 2670:1040-1651]	1652	n/a	AEO66483.1	274	Lipase_GDSL_2	Thielavia terrestris NRRL 8126	CE3	n/a	NO
comp9585_c0_seq1 len=1087 path=[9567:0-76 7665:77-611 8277:612-1086]	1087	CBM_1	AEO70878.1	235	Lipase_GDSL_2	Thielavia terrestris NRRL 8126	CE3	NO	NO
comp7910_c0_seq1 len=1590 path=[1630:0-150 1843:151-977 2670:978-1589]	1590	n/a	AEO66483.1	274	Lipase_GDSL_2	Thielavia terrestris NRRL 8126	CE3	n/a	NO
comp7221_c0_seq2 len=4674 path=[1:0-3122 9437:3123-3186 9647:3187-3201 3203:3202-4673]	4674	n/a	ADK54828.1	988	Lipase_GDSL_2	uncultured soil bacterium	CE3	n/a	NO		E2D2G4
comp3386_c0_seq1 len=1985 path=[1906:0-1606 3833:1607-1663 3513:1664-1984]	1985	Lipase_GDSL_2|Lipase_GDSL	AEO66483.1	274	Lipase_GDSL_2	Thielavia terrestris NRRL 8126	CE3	NO	NO
comp9585_c0_seq4 len=4407 path=[4365:0-286 9353:287-361 9264:362-383 4652:384-532 4801:533-836 5105:837-3396 7665:3397-3931 8277:3932-4406]	4407	PDCD2_C|Lipase_GDSL_2|CBM_1	AEO54377.1	245	Lipase_GDSL_2	Myceliophthora thermophila ATCC 42464	CE3	NO	NO
comp5852_c0_seq2 len=3813 path=[3808:0-1810 5703:1811-2696 7720:2697-2763 6589:2764-3812]	3813	Lipase_GDSL_2|Lipase_GDSL	AEO66483.1	274	Lipase_GDSL_2	Thielavia terrestris NRRL 8126	CE3	NO	NO
comp9585_c0_seq9 len=4409 path=[4365:0-286 9264:287-308 4652:309-457 4801:458-761 5105:762-3321 7665:3322-3856 8200:3857-3933 8277:3934-4408]	4409	PDCD2_C|Lipase_GDSL_2|CBM_1	AEO54377.1	245	Lipase_GDSL_2	Myceliophthora thermophila ATCC 42464	CE3	NO	NO
comp9585_c0_seq8 len=3542 path=[4365:0-286 4652:287-435 4801:436-739 5105:740-3299 8994:3300-3541]	3542	PDCD2_C	AEO54377.1	245	Lipase_GDSL_2	Myceliophthora thermophila ATCC 42464	CE3	NO	NO
comp8990_c0_seq1 len=2341 path=[2319:0-1493 3813:1494-1542 3862:1543-1772 4092:1773-2340]	2341	Lipase_GDSL_2	AEO66483.1	274	Lipase_GDSL_2	Thielavia terrestris NRRL 8126	CE3	YES	NO
comp9585_c0_seq11 len=4387 path=[4365:0-286 4652:287-435 4801:436-739 5105:740-3299 7665:3300-3834 8200:3835-3911 8277:3912-4386]	4387	PDCD2_C|Lipase_GDSL_2|CBM_1	AEO54377.1	245	Lipase_GDSL_2	Myceliophthora thermophila ATCC 42464	CE3	NO	NO
comp5246_c0_seq1 len=5174 path=[5298:0-948 6393:949-5173]	5174	n/a	ABA65775.1	1542	Lipase_GDSL|Lipase_GDSL_2	Aspergillus terreus	CE3	n/a	NO		Q9Y7C6
comp9585_c0_seq3 len=4332 path=[4365:0-286 9264:287-308 4652:309-457 4801:458-761 5105:762-3321 7665:3322-3856 8277:3857-4331]	4332	PDCD2_C|Lipase_GDSL_2|CBM_1	AEO54377.1	245	Lipase_GDSL_2	Myceliophthora thermophila ATCC 42464	CE3	NO	NO
comp7221_c0_seq3 len=4674 path=[1:0-3122 9647:3123-3137 3139:3138-3201 3203:3202-4673]	4674	n/a	ADK54828.1	988	Lipase_GDSL_2	uncultured soil bacterium	CE3	n/a	NO		E2D2G4
comp7910_c0_seq2 len=1712 path=[1630:0-150 1843:151-977 3471:978-1099 2670:1100-1711]	1712	n/a	AEO60969.1	313	Lipase_GDSL	Myceliophthora thermophila ATCC 42464	CE3	n/a	NO
comp8345_c0_seq2 len=3060 path=[3:0-915 919:916-962 966:963-1045 1049:1046-1509 1513:1510-3059]	3060	Glyco_hydro_7	CAP71774.1	295	Lipase_GDSL_2	Podospora anserina S mat+	CE3	NO	NO		B2B3T8
comp9585_c0_seq10 len=3564 path=[4365:0-286 9264:287-308 4652:309-457 4801:458-761 5105:762-3321 8994:3322-3563]	3564	PDCD2_C	AEO54377.1	245	Lipase_GDSL_2	Myceliophthora thermophila ATCC 42464	CE3	NO	NO
comp9585_c0_seq7 len=1164 path=[9567:0-76 7665:77-611 8200:612-688 8277:689-1163]	1164	CBM_1	AEO70878.1	235	Lipase_GDSL_2	Thielavia terrestris NRRL 8126	CE3	NO	NO
comp12355_c0_seq1 len=3726 path=[3704:0-3725]	3726	VCBS|Lipase_GDSL_2|Lipase_GDSL	AEO70515.1	973	Lipase_GDSL_2	Thielavia terrestris NRRL 8126	CE3	NO	NO
comp5852_c0_seq3 len=2108 path=[5597:0-105 5703:106-991 7720:992-1058 6589:1059-2107]	2108	Lipase_GDSL_2|Lipase_GDSL	AEO66483.1	274	Lipase_GDSL_2	Thielavia terrestris NRRL 8126	CE3	NO	NO
comp9728_c0_seq11 len=3684 path=[7094:0-286 7381:287-1583 8678:1584-1584 8679:1585-2716 9811:2717-2839 9934:2840-2859 9954:2860-3072 14872:3073-3136 10167:3137-3215 14442:3216-3269 10246:3270-3319 14364:3320-3374 10296:3375-3468 10452:3469-3590 14689:3591-3683]	3684	GMC_oxred_C	XP_369636.1	NA	n/a	Magnaporthe grisea 70-15	CE4	n/a	n/a		G4N3M4
comp1865_c0_seq1 len=515 path=[1:0-514]	515	n/a	AEO60543.1	NA	n/a	Myceliophthora thermophila ATCC 42464	CE4	n/a	n/a
comp1865_c0_seq1 len=515 path=[1:0-514]	515	n/a	AEO70921.1	NA	n/a	Thielavia terrestris NRRL 8126	CE4	n/a	n/a
comp83198_c0_seq1 len=732 path=[710:0-731]	732	Polysacc_deac_1	XP_361698.1	NA	n/a	Magnaporthe grisea 70-15	CE4	n/a	n/a
comp160462_c0_seq1 len=292 path=[1:0-291]	292	n/a	XP_361698.1	NA	n/a	Magnaporthe grisea 70-15	CE4	n/a	n/a
comp31185_c0_seq1 len=1517 path=[1495:0-1516]	1517	Polysacc_deac_1	XP_361698.1	NA	n/a	Magnaporthe grisea 70-15	CE4	n/a	n/a
comp4930_c0_seq1 len=4003 path=[3981:0-4002]	4003	Cys_Met_Meta_PP|Polysacc_deac_1	BAE60108.1	274	Polysacc_deac_1	Aspergillus oryzae RIB40	CE4	NO	NO		Q2UEA7
comp33694_c0_seq1 len=1683 path=[1661:0-1682]	1683	Polysacc_deac_1	CAP81078.1	NA	n/a	Penicillium chrysogenum Wisconsin 54-1255	CE4	n/a	n/a		B6H122
comp9728_c0_seq19 len=3746 path=[7094:0-286 7381:287-1583 8678:1584-1584 8679:1585-2716 9811:2717-2839 9934:2840-2859 9954:2860-3072 14872:3073-3136 10167:3137-3215 14442:3216-3269 10246:3270-3319 14364:3320-3374 10296:3375-3468 10390:3469-3530 10452:3531-3652 14689:3653-3745]	3746	GMC_oxred_C	XP_369636.1	NA	n/a	Magnaporthe grisea 70-15	CE4	n/a	n/a		G4N3M4
comp6307_c0_seq2 len=8392 path=[8370:0-6421 14792:6422-8153 16524:8154-8391]	8392	Polysacc_deac_1|PRELI	XP_363190.1	382	Polysacc_deac_1	Magnaporthe grisea 70-15	CE4	NO	NO		G4NFM6
comp200259_c0_seq1 len=721 path=[699:0-720]	721	n/a	CAP67406.1	741	Polysacc_deac_1	Podospora anserina S mat+	CE4	n/a	YES		B2ASN3
comp2104_c0_seq1 len=1795 path=[1:0-1794]	1795	Polysacc_deac_1	XP_360918.1	270	Polysacc_deac_1	Magnaporthe grisea 70-15	CE4	YES	NO
comp344192_c0_seq1 len=346 path=[324:0-345]	346	n/a	AEO60543.1	NA	n/a	Myceliophthora thermophila ATCC 42464	CE4	n/a	n/a
comp92297_c0_seq1 len=1212 path=[1190:0-1211]	1212	Polysacc_deac_1	AGE21867.1	299	Polysacc_deac_1	Geobacillus sp. GHH01	CE4	YES	NO
comp5890_c0_seq2 len=4978 path=[4956:0-898 5855:899-1543 6500:1544-4977]	4978	Polysacc_deac_1|Chitin_bind_1|HET	BAI44124.1	542	Polysacc_deac_1	Magnaporthe oryzae	CE4|CBM18	NO	NO		C9K5U5
comp8721_c0_seq4 len=3119 path=[1:0-2448 2450:2449-2472 14202:2473-2808 16768:2809-2864 14538:2865-2901 14575:2902-3118]	3119	Chitin_bind_1|Polysacc_deac_1	AAK84438.1	337	Polysacc_deac_1	Blumeria graminis	CE4|CBM18	NO	NO		Q96VN0
comp8721_c0_seq2 len=5290 path=[12879:0-1091 13971:1092-1299 2450:1300-1323 2474:1324-5289]	5290	Polysacc_deac_1|Chitin_bind_1|PX|Mito_carr|Mito_carr|Mito_carr	BAB79692.1	603	Polysacc_deac_1	Magnaporthe grisea P2	CE4|CBM18	NO	NO		Q8WZJ0
comp8721_c0_seq3 len=3063 path=[1:0-2448 2450:2449-2472 14202:2473-2808 14538:2809-2845 14575:2846-3062]	3063	Chitin_bind_1|Polysacc_deac_1	AAK84438.1	337	Polysacc_deac_1	Blumeria graminis	CE4|CBM18	NO	NO		Q96VN0
comp8721_c0_seq1 len=3026 path=[1:0-2448 2450:2449-2472 14202:2473-2808 14575:2809-3025]	3026	Chitin_bind_1|Polysacc_deac_1	AAK84438.1	337	Polysacc_deac_1	Blumeria graminis	CE4|CBM18	NO	NO		Q96VN0
comp5890_c0_seq1 len=5054 path=[4956:0-898 5855:899-1543 9933:1544-1619 6500:1620-5053]	5054	Polysacc_deac_1|Chitin_bind_1|HET	BAI44124.1	542	Polysacc_deac_1	Magnaporthe oryzae	CE4|CBM18	NO	NO		C9K5U5
comp5652_c0_seq1 len=4211 path=[1:0-548 550:549-4210]	4211	Cutinase	CBY01456.1	329	Cutinase	Leptosphaeria maculans v23.1.3	CE5	YES	NO		E5AE17
comp32851_c0_seq1 len=1410 path=[1388:0-1409]	1410	Cutinase	ABF50882.1	234	Cutinase	Aspergillus nidulans FGSC A4	CE5	YES	NO	3.1.1.74	C8VD42Q5AX00
comp6979_c0_seq1 len=1207 path=[1:0-940 942:941-1206]	1207	Cutinase	BAK82405.1	252	Cutinase	Cryptococcus sp. S-2	CE5	YES	NO	3.1.1.74	Q874E9
comp8768_c0_seq1 len=2894 path=[1:0-1709 5767:1710-1773 1711:1774-2041 5558:2042-2140 1979:2141-2807 2646:2808-2893]	2894	Cutinase|PE-PPE	CCD55294.1	312	Cutinase	Botryotinia fuckeliana	CE5	NO	NO
comp8690_c0_seq2 len=2974 path=[2952:0-158 3111:159-530 3483:531-1183 4136:1184-2973]	2974	Cutinase	XP_368098.1	243	Cutinase	Magnaporthe grisea 70-15	CE5	YES	NO		G4NBZ1
comp8768_c0_seq4 len=2731 path=[1:0-1709 1711:1710-1977 1979:1978-2644 2646:2645-2730]	2731	Cutinase|PE-PPE	CCD55294.1	312	Cutinase	Botryotinia fuckeliana	CE5	NO	NO
comp8768_c0_seq7 len=2880 path=[1:0-1709 5767:1710-1773 1711:1774-2041 1979:2042-2708 5962:2709-2779 6033:2780-2793 2646:2794-2879]	2880	Cutinase|PE-PPE	CCD55294.1	312	Cutinase	Botryotinia fuckeliana	CE5	NO	NO
comp36838_c0_seq1 len=334 path=[312:0-333]	334	Cutinase	BAE64666.1	237	Cutinase	Aspergillus oryzae RIB40	CE5	YES	NO		Q2U199
comp36838_c0_seq1 len=334 path=[312:0-333]	334	Cutinase	BAM28634.1	237	Cutinase	Aspergillus oryzae	CE5	YES	NO
comp6772_c0_seq1 len=1701 path=[2703:0-328 1354:329-1700]	1701	Cutinase	XP_366296.1	389	Cutinase	Magnaporthe grisea 70-15	CE5	YES	NO
comp47330_c0_seq1 len=787 path=[1:0-786]	787	Cutinase	CBY01456.1	329	Cutinase	Leptosphaeria maculans v23.1.3	CE5	YES	NO		E5AE17
comp4258_c0_seq1 len=531 path=[1:0-530]	531	Cutinase	ABF50887.1	268	Cutinase	Aspergillus nidulans FGSC A4	CE5	YES	NO	3.1.1.74	Q5AVY9
comp4258_c0_seq1 len=531 path=[1:0-530]	531	Cutinase	AAA03470.1	222	Cutinase	Alternaria brassicicola ATCC 96866	CE5	YES	NO	3.1.1.74
comp6507_c0_seq1 len=1588 path=[1566:0-208 1775:209-1587]	1588	Cutinase	AEO67382.1	242	Cutinase	Thielavia terrestris NRRL 8126	CE5	YES	NO
comp8768_c0_seq6 len=2979 path=[1:0-1709 5767:1710-1773 1711:1774-2041 5558:2042-2140 1979:2141-2807 5962:2808-2878 6033:2879-2892 2646:2893-2978]	2979	Cutinase|PE-PPE	CCD55294.1	312	Cutinase	Botryotinia fuckeliana	CE5	NO	NO
comp395539_c0_seq1 len=445 path=[423:0-444]	445	Cutinase	CCD43014.1	250	Cutinase	Botryotinia fuckeliana	CE5	YES	NO
comp8768_c0_seq3 len=2915 path=[1:0-1709 1711:1710-1977 5558:1978-2076 1979:2077-2743 5962:2744-2814 6033:2815-2828 2646:2829-2914]	2915	Cutinase|PE-PPE	CCD55294.1	312	Cutinase	Botryotinia fuckeliana	CE5	NO	NO
comp8768_c0_seq8 len=2830 path=[1:0-1709 1711:1710-1977 5558:1978-2076 1979:2077-2743 2646:2744-2829]	2830	Cutinase|PE-PPE	CCD55294.1	312	Cutinase	Botryotinia fuckeliana	CE5	NO	NO
comp8690_c0_seq1 len=3032 path=[2952:0-158 5925:159-216 3111:217-588 3483:589-1241 4136:1242-3031]	3032	Cutinase	XP_368098.1	243	Cutinase	Magnaporthe grisea 70-15	CE5	YES	NO		G4NBZ1
comp8768_c0_seq2 len=2816 path=[1:0-1709 1711:1710-1977 1979:1978-2644 5962:2645-2715 6033:2716-2729 2646:2730-2815]	2816	Cutinase|PE-PPE	CCD55294.1	312	Cutinase	Botryotinia fuckeliana	CE5	NO	NO
comp260991_c0_seq1 len=300 path=[278:0-299]	300	n/a	XP_366296.1	389	Cutinase	Magnaporthe grisea 70-15	CE5	n/a	NO
comp8768_c0_seq5 len=2795 path=[1:0-1709 5767:1710-1773 1711:1774-2041 1979:2042-2708 2646:2709-2794]	2795	Cutinase|PE-PPE	CCD55294.1	312	Cutinase	Botryotinia fuckeliana	CE5	NO	NO
comp3208_c0_seq1 len=2491 path=[2469:0-2490]	2491	Cutinase	XP_366296.1	389	Cutinase	Magnaporthe grisea 70-15	CE5	YES	NO
comp47897_c0_seq1 len=891 path=[1:0-890]	891	Cutinase	CCD42307.1	248	Cutinase	Botryotinia fuckeliana	CE5	YES	NO
comp6507_c0_seq1 len=1588 path=[1566:0-208 1775:209-1587]	1588	Cutinase	CCA70812.1	314	Cutinase	Piriformospora indica	CE5|CBM1	YES	NO
comp200199_c0_seq1 len=227 path=[1:0-226]	227	CBM_1	AEO60460.1	327	Cutinase	Myceliophthora thermophila ATCC 42464	CE5|CBM1	NO	NO
comp9182_c0_seq8 len=5492 path=[1:0-116 11556:117-159 118:160-986 945:987-1438 1397:1439-2218 2272:2219-3492 3546:3493-5491]	5492	COesterase|ATP_bind_4	AEI52017.1	799	DUF303|COesterase	Runella slithyformis DSM 19594	CE6	NO	NO
comp40075_c0_seq1 len=1912 path=[1:0-1911]	1912	COesterase	AEI52017.1	799	DUF303|COesterase	Runella slithyformis DSM 19594	CE6	NO	NO
comp9182_c0_seq15 len=5449 path=[1:0-116 118:117-943 945:944-1395 1397:1396-2175 2272:2176-3449 3546:3450-5448]	5449	COesterase|ATP_bind_4	AEI52017.1	799	DUF303|COesterase	Runella slithyformis DSM 19594	CE6	NO	NO
comp9182_c0_seq11 len=5544 path=[1:0-116 118:117-943 945:944-1395 1397:1396-2175 2177:2176-2270 2272:2271-3544 3546:3545-5543]	5544	COesterase|ATP_bind_4	AEI52017.1	799	DUF303|COesterase	Runella slithyformis DSM 19594	CE6	NO	NO
comp9182_c0_seq13 len=5587 path=[1:0-116 11556:117-159 118:160-986 945:987-1438 1397:1439-2218 2177:2219-2313 2272:2314-3587 3546:3588-5586]	5587	COesterase|ATP_bind_4	AEI52017.1	799	DUF303|COesterase	Runella slithyformis DSM 19594	CE6	NO	NO
comp7262_c0_seq1 len=2022 path=[2000:0-2021]	2022	FPN1	CAN67070.1	884	Pectinesterase|FPN1|FPN1	Vitis vinifera	CE8	NO	NO		A5AS54
comp11882_c0_seq1 len=1940 path=[1:0-1939]	1940	Pectinesterase	XP_368626.1	339	Pectinesterase	Magnaporthe grisea 70-15	CE8	YES	NO		G4NB63
comp542888_c0_seq1 len=266 path=[1:0-265]	266	n/a	AEO70721.1	410	Pectinesterase	Thielavia terrestris NRRL 8126	CE8	n/a	NO
comp2345_c0_seq2 len=2896 path=[2791:0-1270 5611:1271-1353 4062:1354-2895]	2896	FPN1|FPN1	CAN67070.1	884	Pectinesterase|FPN1|FPN1	Vitis vinifera	CE8	NO	NO		A5AS54
comp89430_c0_seq1 len=1210 path=[1188:0-1209]	1210	Abhydrolase_3	AGA79320.1	644	Pectinesterase|Abhydrolase_3	Echinicola vietnamensis DSM 17526	CE8	NO	NO
comp2345_c0_seq1 len=2813 path=[2791:0-1270 4062:1271-2812]	2813	FPN1	CAN67070.1	884	Pectinesterase|FPN1|FPN1	Vitis vinifera	CE8	NO	NO		A5AS54
comp7481_c0_seq1 len=3762 path=[11369:0-73 11271:74-85 7554:86-3761]	3762	UvrD_C_2|UvrD_C|AAA_19|UvrD-helicase	AEO58969.1	NA	n/a	Myceliophthora thermophila ATCC 42464	CE9	n/a	n/a
comp6707_c0_seq1 len=1547 path=[1525:0-609 2135:610-752 2278:753-1546]	1547	Amidohydro_3|Amidohydro_1|Amidohydro_4|Amidohydro_5	ACU40719.1	398	Amidohydro_1	Actinosynnema mirum DSM 43827	CE9	NO	NO		C6WR26
comp9945_c0_seq1 len=3362 path=[3340:0-3361]	3362	Glucosamine_iso	CCG56996.1	667	Amidohydro_1	Brachyspira pilosicoli WesB	CE9	NO	NO
comp9945_c0_seq1 len=3362 path=[3340:0-3361]	3362	Glucosamine_iso	AGA65840.1	667	Amidohydro_1	Brachyspira pilosicoli P43/6/78	CE9	NO	NO
comp9945_c0_seq1 len=3362 path=[3340:0-3361]	3362	Glucosamine_iso	ADG70601.1	667	Amidohydro_1	Brachyspira murdochii DSM 12563	CE9	NO	NO		D5U6N5
comp9945_c0_seq1 len=3362 path=[3340:0-3361]	3362	Glucosamine_iso	ADK30104.1	667	Amidohydro_1	Brachyspira pilosicoli 95/1000	CE9	NO	NO		D8I9Y7
comp7481_c0_seq2 len=3708 path=[11251:0-19 11271:20-31 7554:32-3707]	3708	UvrD_C_2|UvrD_C|AAA_19|UvrD-helicase	AEO58969.1	NA	n/a	Myceliophthora thermophila ATCC 42464	CE9	n/a	n/a
comp7481_c0_seq3 len=5626 path=[5604:0-1949 7554:1950-5625]	5626	UvrD_C_2|UvrD_C|AAA_19|UvrD-helicase	XP_368624.1	NA	n/a	Magnaporthe grisea 70-15	CE9	n/a	n/a		G4NB58
comp7481_c0_seq3 len=5626 path=[5604:0-1949 7554:1950-5625]	5626	UvrD_C_2|UvrD_C|AAA_19|UvrD-helicase	ADD84625.1	NA	n/a	Magnaporthe oryzae	CE9	n/a	n/a		D4NXH3
comp6980_c0_seq3 len=2165 path=[9:0-726 4730:727-742 752:743-1484 1494:1485-2164]	2165	NAD_binding_4|Epimerase	AEG91581.1	772	RmlD_sub_bind	Ramlibacter tataouinensis TTB310	GH1	NO	NO
comp8309_c0_seq1 len=2556 path=[1:0-2488 2491:2489-2555]	2556	Glyco_hydro_1	XP_364893.1	633	Glyco_hydro_1	Magnaporthe grisea 70-15	GH1	YES	NO		G4NA47
comp9158_c0_seq2 len=1363 path=[1341:0-340 1682:341-661 2003:662-868 2210:869-1362]	1363	n/a	EAA65642.1	826	Glyco_hydro_1	Aspergillus nidulans FGSC A4	GH1	n/a	NO		Q5BF68
comp6980_c0_seq2 len=2196 path=[9:0-726 4394:727-773 752:774-1515 1494:1516-2195]	2196	NAD_binding_4|Epimerase	AEG91581.1	772	RmlD_sub_bind	Ramlibacter tataouinensis TTB310	GH1	NO	NO
comp9158_c0_seq3 len=1431 path=[1341:0-340 2763:341-400 2733:401-408 1682:409-729 2003:730-936 2210:937-1430]	1431	HTH_Tnp_Tc3_2	EAA65642.1	826	Glyco_hydro_1	Aspergillus nidulans FGSC A4	GH1	NO	NO		Q5BF68
comp6980_c0_seq1 len=2299 path=[9:0-726 4730:727-742 4620:743-829 4394:830-876 752:877-1618 1494:1619-2298]	2299	NAD_binding_4|Epimerase	AEG91581.1	772	RmlD_sub_bind	Ramlibacter tataouinensis TTB310	GH1	NO	NO
comp3374_c0_seq1 len=2282 path=[1:0-874 876:875-2281]	2282	Glyco_hydro_1	AGC30579.1	489	Glyco_hydro_1	Phialophora sp. G5 / CGMCC 3328	GH1	YES	NO	3.2.1.21
comp9648_c0_seq5 len=7442 path=[21070:0-3517 30515:3518-3585 24588:3586-3844 24847:3845-3865 24868:3866-3926 30059:3927-3987 24929:3988-4475 25516:4476-5877 30854:5878-5940 26918:5941-7441]	7442	TauD|Asn_synthase|Asn_synthase|Asn_synthase|GATase_7|GATase_6|GATase_2	CAQ16209.1	311	Glyco_hydro_10	Glomerella graminicola M2	GH10	NO	NO		B5WY69
comp9648_c0_seq12 len=8287 path=[21070:0-3517 24588:3518-3776 24847:3777-3797 24868:3798-3858 24929:3859-4346 25516:4347-5748 30854:5749-5811 26918:5812-7312 6582:7313-7348 10174:7349-7674 10500:7675-7750 10576:7751-7753 31316:7754-7776 28442:7777-8286]	8287	TauD|Asn_synthase|Asn_synthase|GATase_7|GATase_6|GATase_2|Glyco_hydro_10	AAC06240.1	341	Glyco_hydro_10	Fusarium oxysporum f. sp. lycopersici 42-87	GH10	NO	NO		O59938
comp9648_c0_seq23 len=7428 path=[21070:0-3517 24588:3518-3776 31198:3777-3784 30716:3785-3855 24847:3856-3876 24868:3877-3937 24929:3938-4425 25417:4426-4524 25516:4525-5926 26918:5927-7427]	7428	TauD|Asn_synthase|Asn_synthase|GATase_7|GATase_6|GATase_2	CAQ16209.1	311	Glyco_hydro_10	Glomerella graminicola M2	GH10	NO	NO		B5WY69
comp9648_c0_seq3 len=1380 path=[31316:0-22 10602:23-1261 11841:1262-1379]	1380	Glyco_hydro_10	BAG12101.1	340	Glyco_hydro_10	Penicillium citrinum FERM P-15944 / MU-4	GH10	YES	NO	3.2.1.8	B1B533
comp9648_c0_seq3 len=1380 path=[31316:0-22 10602:23-1261 11841:1262-1379]	1380	Glyco_hydro_10	AAC23574.1	315	Glyco_hydro_10	Penicillium simplicissimum BT2246	GH10	YES	NO	3.2.1.8	P56588
comp9648_c0_seq15 len=1505 path=[31316:0-22 10602:23-1261 29462:1262-1504]	1505	Glyco_hydro_10	BAG12101.1	340	Glyco_hydro_10	Penicillium citrinum FERM P-15944 / MU-4	GH10	YES	NO	3.2.1.8	B1B533
comp9648_c0_seq15 len=1505 path=[31316:0-22 10602:23-1261 29462:1262-1504]	1505	Glyco_hydro_10	AAC23574.1	315	Glyco_hydro_10	Penicillium simplicissimum BT2246	GH10	YES	NO	3.2.1.8	P56588
comp9648_c0_seq9 len=7453 path=[21070:0-3517 24588:3518-3776 31198:3777-3784 30716:3785-3855 24847:3856-3876 24868:3877-3937 30059:3938-3998 24929:3999-4486 25516:4487-5888 30854:5889-5951 26918:5952-7452]	7453	TauD|Asn_synthase|Asn_synthase|GATase_7|GATase_6|GATase_2	CAQ16209.1	311	Glyco_hydro_10	Glomerella graminicola M2	GH10	NO	NO		B5WY69
comp27203_c0_seq1 len=818 path=[796:0-817]	818	Glyco_hydro_10	AAU89274.1	338	Glyco_hydro_10	Cryptovalsa sp. BCC 7197	GH10	YES	NO	3.2.1.8	Q5XQ46
comp9648_c0_seq1 len=7478 path=[21070:0-3517 30515:3518-3585 24588:3586-3844 24847:3845-3865 24868:3866-3926 30059:3927-3987 24929:3988-4475 25417:4476-4574 25516:4575-5976 26918:5977-7477]	7478	TauD|Asn_synthase|Asn_synthase|Asn_synthase|GATase_7|GATase_6|GATase_2	CAQ16209.1	311	Glyco_hydro_10	Glomerella graminicola M2	GH10	NO	NO		B5WY69
comp9648_c0_seq13 len=7552 path=[21070:0-3517 24588:3518-3776 31198:3777-3784 30716:3785-3855 24847:3856-3876 24868:3877-3937 30059:3938-3998 24929:3999-4486 25417:4487-4585 25516:4586-5987 30854:5988-6050 26918:6051-7551]	7552	TauD|Asn_synthase|Asn_synthase|GATase_7|GATase_6|GATase_2	CAQ16209.1	311	Glyco_hydro_10	Glomerella graminicola M2	GH10	NO	NO		B5WY69
comp9648_c0_seq29 len=8447 path=[21070:0-3517 24588:3518-3776 24847:3777-3797 24868:3798-3858 30059:3859-3919 24929:3920-4407 25417:4408-4506 25516:4507-5908 30854:5909-5971 26918:5972-7472 6582:7473-7508 10174:7509-7834 10500:7835-7910 10576:7911-7913 31316:7914-7936 28442:7937-8446]	8447	TauD|Asn_synthase|Asn_synthase|GATase_7|GATase_6|GATase_2|Glyco_hydro_10	AAC06240.1	341	Glyco_hydro_10	Fusarium oxysporum f. sp. lycopersici 42-87	GH10	NO	NO		O59938
comp9648_c0_seq4 len=7390 path=[21070:0-3517 24588:3518-3776 31198:3777-3784 30716:3785-3855 24847:3856-3876 24868:3877-3937 30059:3938-3998 24929:3999-4486 25516:4487-5888 26918:5889-7389]	7390	TauD|Asn_synthase|Asn_synthase|GATase_7|GATase_6|GATase_2	CAQ16209.1	311	Glyco_hydro_10	Glomerella graminicola M2	GH10	NO	NO		B5WY69
comp9648_c0_seq7 len=8384 path=[21070:0-3517 24588:3518-3776 24847:3777-3797 24868:3798-3858 30059:3859-3919 24929:3920-4407 25417:4408-4506 25516:4507-5908 26918:5909-7409 6582:7410-7445 10174:7446-7771 10500:7772-7847 10576:7848-7850 31316:7851-7873 28442:7874-8383]	8384	TauD|Asn_synthase|Asn_synthase|GATase_7|GATase_6|GATase_2|Glyco_hydro_10	AAC06240.1	341	Glyco_hydro_10	Fusarium oxysporum f. sp. lycopersici 42-87	GH10	NO	NO		O59938
comp9648_c0_seq26 len=7489 path=[21070:0-3517 24588:3518-3776 31198:3777-3784 30716:3785-3855 24847:3856-3876 24868:3877-3937 30059:3938-3998 24929:3999-4486 25417:4487-4585 25516:4586-5987 26918:5988-7488]	7489	TauD|Asn_synthase|Asn_synthase|GATase_7|GATase_6|GATase_2	CAQ16209.1	311	Glyco_hydro_10	Glomerella graminicola M2	GH10	NO	NO		B5WY69
comp9648_c0_seq24 len=7379 path=[21070:0-3517 30515:3518-3585 24588:3586-3844 24847:3845-3865 24868:3866-3926 30059:3927-3987 24929:3988-4475 25516:4476-5877 26918:5878-7378]	7379	TauD|Asn_synthase|Asn_synthase|Asn_synthase|GATase_7|GATase_6|GATase_2	CAQ16209.1	311	Glyco_hydro_10	Glomerella graminicola M2	GH10	NO	NO		B5WY69
comp199754_c0_seq1 len=208 path=[1:0-207]	208	Glyco_hydro_10	AAT84255.1	460	Glyco_hydro_10	Fusarium graminearum F4	GH10	YES	NO		Q49SA4
comp9648_c0_seq8 len=8292 path=[21070:0-3517 30515:3518-3585 24588:3586-3844 24847:3845-3865 24868:3866-3926 24929:3927-4414 25516:4415-5816 26918:5817-7317 6582:7318-7353 10174:7354-7679 10500:7680-7755 10576:7756-7758 31316:7759-7781 28442:7782-8291]	8292	TauD|Asn_synthase|Asn_synthase|Asn_synthase|GATase_7|GATase_6|GATase_2|Glyco_hydro_10	AAC06240.1	341	Glyco_hydro_10	Fusarium oxysporum f. sp. lycopersici 42-87	GH10	NO	NO		O59938
comp9648_c0_seq21 len=8391 path=[21070:0-3517 30515:3518-3585 24588:3586-3844 24847:3845-3865 24868:3866-3926 24929:3927-4414 25417:4415-4513 25516:4514-5915 26918:5916-7416 6582:7417-7452 10174:7453-7778 10500:7779-7854 10576:7855-7857 31316:7858-7880 28442:7881-8390]	8391	TauD|Asn_synthase|Asn_synthase|Asn_synthase|GATase_7|GATase_6|GATase_2|Glyco_hydro_10	AAC06240.1	341	Glyco_hydro_10	Fusarium oxysporum f. sp. lycopersici 42-87	GH10	NO	NO		O59938
comp9648_c0_seq14 len=8224 path=[21070:0-3517 24588:3518-3776 24847:3777-3797 24868:3798-3858 24929:3859-4346 25516:4347-5748 26918:5749-7249 6582:7250-7285 10174:7286-7611 10500:7612-7687 10576:7688-7690 31316:7691-7713 28442:7714-8223]	8224	TauD|Asn_synthase|Asn_synthase|GATase_7|GATase_6|GATase_2|Glyco_hydro_10	AAC06240.1	341	Glyco_hydro_10	Fusarium oxysporum f. sp. lycopersici 42-87	GH10	NO	NO		O59938
comp1844_c0_seq1 len=469 path=[1:0-262 264:263-339 341:340-468]	469	Glyco_hydro_10|Glyco_hydro_10	XP_367964.1	376	Glyco_hydro_10	Magnaporthe grisea 70-15	GH10	NO	YES		G4N1Y8
comp9648_c0_seq27 len=7392 path=[21070:0-3517 24588:3518-3776 31198:3777-3784 30716:3785-3855 24847:3856-3876 24868:3877-3937 24929:3938-4425 25516:4426-5827 30854:5828-5890 26918:5891-7391]	7392	TauD|Asn_synthase|Asn_synthase|GATase_7|GATase_6|GATase_2	CAQ16209.1	311	Glyco_hydro_10	Glomerella graminicola M2	GH10	NO	NO		B5WY69
comp9648_c0_seq20 len=8285 path=[21070:0-3517 24588:3518-3776 24847:3777-3797 24868:3798-3858 30059:3859-3919 24929:3920-4407 25516:4408-5809 26918:5810-7310 6582:7311-7346 10174:7347-7672 10500:7673-7748 10576:7749-7751 31316:7752-7774 28442:7775-8284]	8285	TauD|Asn_synthase|Asn_synthase|GATase_7|GATase_6|GATase_2|Glyco_hydro_10	AAC06240.1	341	Glyco_hydro_10	Fusarium oxysporum f. sp. lycopersici 42-87	GH10	NO	NO		O59938
comp9648_c0_seq25 len=8386 path=[21070:0-3517 24588:3518-3776 24847:3777-3797 24868:3798-3858 24929:3859-4346 25417:4347-4445 25516:4446-5847 30854:5848-5910 26918:5911-7411 6582:7412-7447 10174:7448-7773 10500:7774-7849 10576:7850-7852 31316:7853-7875 28442:7876-8385]	8386	TauD|Asn_synthase|Asn_synthase|GATase_7|GATase_6|GATase_2|Glyco_hydro_10	AAC06240.1	341	Glyco_hydro_10	Fusarium oxysporum f. sp. lycopersici 42-87	GH10	NO	NO		O59938
comp9648_c0_seq17 len=8355 path=[21070:0-3517 30515:3518-3585 24588:3586-3844 24847:3845-3865 24868:3866-3926 24929:3927-4414 25516:4415-5816 30854:5817-5879 26918:5880-7380 6582:7381-7416 10174:7417-7742 10500:7743-7818 10576:7819-7821 31316:7822-7844 28442:7845-8354]	8355	TauD|Asn_synthase|Asn_synthase|Asn_synthase|GATase_7|GATase_6|GATase_2|Glyco_hydro_10	AAC06240.1	341	Glyco_hydro_10	Fusarium oxysporum f. sp. lycopersici 42-87	GH10	NO	NO		O59938
comp3447_c0_seq1 len=1675 path=[1:0-632 634:633-1674]	1675	Glyco_hydro_10	AEO58598.1	388	Glyco_hydro_10	Myceliophthora thermophila ATCC 42464	GH10	YES	NO	3.2.1.8
comp9648_c0_seq10 len=7541 path=[21070:0-3517 30515:3518-3585 24588:3586-3844 24847:3845-3865 24868:3866-3926 30059:3927-3987 24929:3988-4475 25417:4476-4574 25516:4575-5976 30854:5977-6039 26918:6040-7540]	7541	TauD|Asn_synthase|Asn_synthase|Asn_synthase|GATase_7|GATase_6|GATase_2	CAQ16209.1	311	Glyco_hydro_10	Glomerella graminicola M2	GH10	NO	NO		B5WY69
comp9648_c0_seq16 len=5098 path=[5076:0-1505 6582:1506-1541 6618:1542-3870 8947:3871-5097]	5098	Glyco_hydro_10|Aldo_ket_red	BAA92882.1	336	Glyco_hydro_10	Aspergillus sojae NO.3	GH10	NO	NO	3.2.1.8	Q9P955
comp9648_c0_seq19 len=8348 path=[21070:0-3517 24588:3518-3776 24847:3777-3797 24868:3798-3858 30059:3859-3919 24929:3920-4407 25516:4408-5809 30854:5810-5872 26918:5873-7373 6582:7374-7409 10174:7410-7735 10500:7736-7811 10576:7812-7814 31316:7815-7837 28442:7838-8347]	8348	TauD|Asn_synthase|Asn_synthase|GATase_7|GATase_6|GATase_2|Glyco_hydro_10	AAC06240.1	341	Glyco_hydro_10	Fusarium oxysporum f. sp. lycopersici 42-87	GH10	NO	NO		O59938
comp9648_c0_seq2 len=8323 path=[21070:0-3517 24588:3518-3776 24847:3777-3797 24868:3798-3858 24929:3859-4346 25417:4347-4445 25516:4446-5847 26918:5848-7348 6582:7349-7384 10174:7385-7710 10500:7711-7786 10576:7787-7789 31316:7790-7812 28442:7813-8322]	8323	TauD|Asn_synthase|Asn_synthase|GATase_7|GATase_6|GATase_2|Glyco_hydro_10	AAC06240.1	341	Glyco_hydro_10	Fusarium oxysporum f. sp. lycopersici 42-87	GH10	NO	NO		O59938
comp9648_c0_seq6 len=7480 path=[21070:0-3517 30515:3518-3585 24588:3586-3844 24847:3845-3865 24868:3866-3926 24929:3927-4414 25417:4415-4513 25516:4514-5915 30854:5916-5978 26918:5979-7479]	7480	TauD|Asn_synthase|Asn_synthase|Asn_synthase|GATase_7|GATase_6|GATase_2	CAQ16209.1	311	Glyco_hydro_10	Glomerella graminicola M2	GH10	NO	NO		B5WY69
comp39379_c0_seq1 len=2101 path=[1:0-2100]	2101	DSPc|Glyco_hydro_10	AEN99941.1	426	Glyco_hydro_10|CBM_1	Chrysosporium lucknowense VKM F-3500-D	GH10|CBM1	NO	NO
comp39379_c0_seq1 len=2101 path=[1:0-2100]	2101	DSPc|Glyco_hydro_10	AEO60457.1	426	Glyco_hydro_10|CBM_1	Myceliophthora thermophila ATCC 42464	GH10|CBM1	NO	NO	3.2.1.8
comp7088_c0_seq1 len=367 path=[1:0-366]	367	CBM_1	AAC06239.1	397	Glyco_hydro_10	Fusarium oxysporum f. sp. lycopersici 42-87	GH10|CBM1	NO	YES	3.2.1.8	O59937
comp26485_c0_seq1 len=1066 path=[1044:0-1065]	1066	Glyco_hydro_10	AEN99940.1	397	Glyco_hydro_10	Chrysosporium lucknowense VKM F-3500-D	GH10|CBM1	YES	NO
comp1844_c0_seq2 len=392 path=[1:0-262 341:263-391]	392	Glyco_hydro_10	AEN99941.1	426	Glyco_hydro_10|CBM_1	Chrysosporium lucknowense VKM F-3500-D	GH10|CBM1	NO	YES
comp1844_c0_seq2 len=392 path=[1:0-262 341:263-391]	392	Glyco_hydro_10	AEO60457.1	426	Glyco_hydro_10|CBM_1	Myceliophthora thermophila ATCC 42464	GH10|CBM1	NO	YES	3.2.1.8
comp1430_c0_seq1 len=587 path=[565:0-491 1057:492-586]	587	Glyco_hydro_10	AEJ35165.1	407	Glyco_hydro_10	Gloeophyllum trabeum	GH10|CBM1	YES	NO
comp6370_c0_seq2 len=3038 path=[6504:0-5 3428:6-1585 5008:1586-3037]	3038	SprT-like	CCA70058.1	588	SprT-like	Piriformospora indica	GH10|CBM1	YES	NO
comp649869_c0_seq1 len=201 path=[1:0-200]	201	Glyco_hydro_101	AEW84145.1	1241	Glyco_hydro_101	Propionibacterium acnes TypeIA2 P.acn31	GH101	YES	NO
comp649869_c0_seq1 len=201 path=[1:0-200]	201	Glyco_hydro_101	AEW79636.1	1334	Glyco_hydro_101	Propionibacterium acnes TypeIA2 P.acn33	GH101|CBM32	YES	NO
comp649869_c0_seq1 len=201 path=[1:0-200]	201	Glyco_hydro_101	AFU41400.1	1295	Glyco_hydro_101	Propionibacterium acnes C1	GH101|CBM32	YES	NO
comp649869_c0_seq1 len=201 path=[1:0-200]	201	Glyco_hydro_101	AEE72811.1	1334	Glyco_hydro_101	Propionibacterium acnes 266	GH101|CBM32	YES	NO
comp649869_c0_seq1 len=201 path=[1:0-200]	201	Glyco_hydro_101	ADE01234.1	1334	Glyco_hydro_101	Propionibacterium acnes SK137	GH101|CBM32	YES	NO		D4HFI2
comp649869_c0_seq1 len=201 path=[1:0-200]	201	Glyco_hydro_101	AAT83312.1	1334	Glyco_hydro_101	Propionibacterium acnes KPA171202	GH101|CBM32	YES	NO	3.2.1.97	Q6A7F3
comp649869_c0_seq1 len=201 path=[1:0-200]	201	Glyco_hydro_101	AEW81879.1	1334	Glyco_hydro_101	Propionibacterium acnes TypeIA2 P.acn17	GH101|CBM32	YES	NO
comp649869_c0_seq1 len=201 path=[1:0-200]	201	Glyco_hydro_101	AER04697.1	1334	Glyco_hydro_101	Propionibacterium acnes ATCC 11828	GH101|CBM32	YES	NO
comp5375_c0_seq1 len=3115 path=[23:0-902 926:903-3114]	3115	Aldose_epim	CAJ26126.1	733	SLT_2|Aldose_epim	Xanthomonas campestris pv. vesicatoria str. 85-10	GH103	NO	NO		Q3BM87
comp2392_c0_seq1 len=2309 path=[1:0-2308]	2309	Glyco_hydro_88	AEO64652.1	391	Glyco_hydro_88	Thielavia terrestris NRRL 8126	GH105	YES	NO
comp11954_c0_seq1 len=1653 path=[1631:0-1652]	1653	Glyco_hydro_88	BAE63195.1	432	Glyco_hydro_88	Aspergillus oryzae RIB40	GH105	YES	NO
comp6237_c0_seq2 len=2651 path=[2633:0-632 3266:633-1262 3900:1263-2650]	2651	DUF2264|DUF2264	ADY36172.1	783	Glyco_hydro_88|DUF2264	Bacteroides salanitronis DSM 18170	GH105	NO	NO
comp6237_c0_seq1 len=2084 path=[5286:0-65 3266:66-695 3900:696-2083]	2084	DUF2264|DUF2264	ADY36172.1	783	Glyco_hydro_88|DUF2264	Bacteroides salanitronis DSM 18170	GH105	NO	NO
comp9680_c0_seq58 len=7462 path=[1:0-2556 2558:2557-2763 15956:2764-2822 2765:2823-3385 3332:3386-3796 3743:3797-3870 3817:3871-5244 5191:5245-5799 16549:5800-5899 5746:5900-7461]	7462	DUF3237	ADE82894.1	1609	Glyco_hydro_28|Glyco_hydro_88	Prevotella ruminicola 23	GH105|GH28	NO	NO		D5ET13
comp9680_c0_seq56 len=7417 path=[1:0-2556 2558:2557-2763 2765:2764-3326 17170:3327-3330 15769:3331-3414 3332:3415-3825 3817:3826-5199 5191:5200-5754 16549:5755-5854 5746:5855-7416]	7417	DUF3237	ADE82894.1	1609	Glyco_hydro_28|Glyco_hydro_88	Prevotella ruminicola 23	GH105|GH28	NO	NO		D5ET13
comp9680_c0_seq12 len=5805 path=[1:0-2556 16470:2557-2615 2558:2616-2822 2765:2823-3385 3332:3386-3796 3817:3797-5170 16878:5171-5249 5191:5250-5804]	5805	DUF3237	ADE82894.1	1609	Glyco_hydro_28|Glyco_hydro_88	Prevotella ruminicola 23	GH105|GH28	NO	NO		D5ET13
comp9680_c0_seq48 len=5230 path=[1:0-2556 16470:2557-2615 2558:2616-2822 15956:2823-2881 2765:2882-3444 3332:3445-3855 3817:3856-5229]	5230	DUF3237	ADE82894.1	1609	Glyco_hydro_28|Glyco_hydro_88	Prevotella ruminicola 23	GH105|GH28	NO	NO		D5ET13
comp9680_c0_seq37 len=7851 path=[1:0-2556 2558:2557-2763 2765:2764-3326 3332:3327-3737 3817:3738-5111 5191:5112-5666 5746:5667-7228 16038:7229-7290 7308:7291-7506 16300:7507-7575 7524:7576-7850]	7851	DUF3237	ADE82894.1	1609	Glyco_hydro_28|Glyco_hydro_88	Prevotella ruminicola 23	GH105|GH28	NO	NO		D5ET13
comp9680_c0_seq19 len=5304 path=[1:0-2556 16470:2557-2615 2558:2616-2822 15956:2823-2881 2765:2882-3444 3332:3445-3855 3743:3856-3929 3817:3930-5303]	5304	DUF3237	ADE82894.1	1609	Glyco_hydro_28|Glyco_hydro_88	Prevotella ruminicola 23	GH105|GH28	NO	NO		D5ET13
comp9680_c0_seq29 len=7760 path=[1:0-2556 2558:2557-2763 2765:2764-3326 3332:3327-3737 3743:3738-3811 3817:3812-5185 16878:5186-5264 5191:5265-5819 16549:5820-5919 5746:5920-7481 16038:7482-7543 7308:7544-7759]	7760	DUF3237	ADE82894.1	1609	Glyco_hydro_28|Glyco_hydro_88	Prevotella ruminicola 23	GH105|GH28	NO	NO		D5ET13
comp9680_c0_seq22 len=5893 path=[1:0-2556 16470:2557-2615 2558:2616-2822 2765:2823-3385 17170:3386-3389 15769:3390-3473 3332:3474-3884 3817:3885-5258 16878:5259-5337 5191:5338-5892]	5893	DUF3237	ADE82894.1	1609	Glyco_hydro_28|Glyco_hydro_88	Prevotella ruminicola 23	GH105|GH28	NO	NO		D5ET13
comp9680_c0_seq7 len=7951 path=[1:0-2556 2558:2557-2763 2765:2764-3326 17170:3327-3330 15769:3331-3414 3332:3415-3825 3743:3826-3899 3817:3900-5273 5191:5274-5828 5746:5829-7390 7308:7391-7606 16300:7607-7675 7524:7676-7950]	7951	DUF3237	ADE82894.1	1609	Glyco_hydro_28|Glyco_hydro_88	Prevotella ruminicola 23	GH105|GH28	NO	NO		D5ET13
comp9680_c0_seq46 len=7873 path=[1:0-2556 2558:2557-2763 2765:2764-3326 3332:3327-3737 3743:3738-3811 3817:3812-5185 16878:5186-5264 5191:5265-5819 5746:5820-7381 7308:7382-7597 7524:7598-7872]	7873	DUF3237	ADE82894.1	1609	Glyco_hydro_28|Glyco_hydro_88	Prevotella ruminicola 23	GH105|GH28	NO	NO		D5ET13
comp9680_c0_seq3 len=7669 path=[1:0-2556 2558:2557-2763 2765:2764-3326 17170:3327-3330 15769:3331-3414 3332:3415-3825 3743:3826-3899 3817:3900-5273 5191:5274-5828 5746:5829-7390 16038:7391-7452 7308:7453-7668]	7669	DUF3237	ADE82894.1	1609	Glyco_hydro_28|Glyco_hydro_88	Prevotella ruminicola 23	GH105|GH28	NO	NO		D5ET13
comp9680_c0_seq24 len=7789 path=[1:0-2556 2558:2557-2763 2765:2764-3326 3332:3327-3737 3817:3738-5111 5191:5112-5666 5746:5667-7228 7308:7229-7444 16300:7445-7513 7524:7514-7788]	7789	DUF3237	ADE82894.1	1609	Glyco_hydro_28|Glyco_hydro_88	Prevotella ruminicola 23	GH105|GH28	NO	NO		D5ET13
comp9680_c0_seq10 len=5967 path=[1:0-2556 2558:2557-2763 15956:2764-2822 2765:2823-3385 17170:3386-3389 15769:3390-3473 3332:3474-3884 3743:3885-3958 3817:3959-5332 16878:5333-5411 5191:5412-5966]	5967	DUF3237	ADE82894.1	1609	Glyco_hydro_28|Glyco_hydro_88	Prevotella ruminicola 23	GH105|GH28	NO	NO		D5ET13
comp9680_c0_seq45 len=7868 path=[1:0-2556 2558:2557-2763 2765:2764-3326 3332:3327-3737 3817:3738-5111 16878:5112-5190 5191:5191-5745 5746:5746-7307 7308:7308-7523 16300:7524-7592 7524:7593-7867]	7868	DUF3237	ADE82894.1	1609	Glyco_hydro_28|Glyco_hydro_88	Prevotella ruminicola 23	GH105|GH28	NO	NO		D5ET13
comp9680_c0_seq17 len=7794 path=[1:0-2556 2558:2557-2763 2765:2764-3326 3332:3327-3737 3743:3738-3811 3817:3812-5185 5191:5186-5740 5746:5741-7302 7308:7303-7518 7524:7519-7793]	7794	DUF3237	ADE82894.1	1609	Glyco_hydro_28|Glyco_hydro_88	Prevotella ruminicola 23	GH105|GH28	NO	NO		D5ET13
comp9680_c0_seq55 len=7808 path=[1:0-2556 2558:2557-2763 2765:2764-3326 17170:3327-3330 15769:3331-3414 3332:3415-3825 3817:3826-5199 5191:5200-5754 5746:5755-7316 7308:7317-7532 7524:7533-7807]	7808	DUF3237	ADE82894.1	1609	Glyco_hydro_28|Glyco_hydro_88	Prevotella ruminicola 23	GH105|GH28	NO	NO		D5ET13
comp9680_c0_seq6 len=7595 path=[1:0-2556 2558:2557-2763 2765:2764-3326 17170:3327-3330 15769:3331-3414 3332:3415-3825 3817:3826-5199 5191:5200-5754 5746:5755-7316 16038:7317-7378 7308:7379-7594]	7595	DUF3237	ADE82894.1	1609	Glyco_hydro_28|Glyco_hydro_88	Prevotella ruminicola 23	GH105|GH28	NO	NO		D5ET13
comp9680_c0_seq52 len=5879 path=[1:0-2556 16470:2557-2615 2558:2616-2822 2765:2823-3385 3332:3386-3796 3743:3797-3870 3817:3871-5244 16878:5245-5323 5191:5324-5878]	5879	DUF3237	ADE82894.1	1609	Glyco_hydro_28|Glyco_hydro_88	Prevotella ruminicola 23	GH105|GH28	NO	NO		D5ET13
comp9680_c0_seq59 len=7607 path=[1:0-2556 2558:2557-2763 2765:2764-3326 3332:3327-3737 3817:3738-5111 5191:5112-5666 16549:5667-5766 5746:5767-7328 16038:7329-7390 7308:7391-7606]	7607	DUF3237	ADE82894.1	1609	Glyco_hydro_28|Glyco_hydro_88	Prevotella ruminicola 23	GH105|GH28	NO	NO		D5ET13
comp9680_c0_seq9 len=7799 path=[1:0-2556 2558:2557-2763 2765:2764-3326 3332:3327-3737 3817:3738-5111 16878:5112-5190 5191:5191-5745 5746:5746-7307 7308:7308-7523 7524:7524-7798]	7799	DUF3237	ADE82894.1	1609	Glyco_hydro_28|Glyco_hydro_88	Prevotella ruminicola 23	GH105|GH28	NO	NO		D5ET13
comp9680_c0_seq38 len=5814 path=[1:0-2556 2558:2557-2763 15956:2764-2822 2765:2823-3385 17170:3386-3389 15769:3390-3473 3332:3474-3884 3817:3885-5258 5191:5259-5813]	5814	DUF3237	ADE82894.1	1609	Glyco_hydro_28|Glyco_hydro_88	Prevotella ruminicola 23	GH105|GH28	NO	NO		D5ET13
comp9680_c0_seq42 len=7894 path=[1:0-2556 2558:2557-2763 2765:2764-3326 3332:3327-3737 3743:3738-3811 3817:3812-5185 5191:5186-5740 16549:5741-5840 5746:5841-7402 7308:7403-7618 7524:7619-7893]	7894	DUF3237	ADE82894.1	1609	Glyco_hydro_28|Glyco_hydro_88	Prevotella ruminicola 23	GH105|GH28	NO	NO		D5ET13
comp9680_c0_seq57 len=5800 path=[1:0-2556 16470:2557-2615 2558:2616-2822 2765:2823-3385 3332:3386-3796 3743:3797-3870 3817:3871-5244 5191:5245-5799]	5800	DUF3237	ADE82894.1	1609	Glyco_hydro_28|Glyco_hydro_88	Prevotella ruminicola 23	GH105|GH28	NO	NO		D5ET13
comp9680_c0_seq49 len=7470 path=[1:0-2556 2558:2557-2763 2765:2764-3326 17170:3327-3330 15769:3331-3414 3332:3415-3825 3743:3826-3899 3817:3900-5273 16878:5274-5352 5191:5353-5907 5746:5908-7469]	7470	DUF3237	ADE82894.1	1609	Glyco_hydro_28|Glyco_hydro_88	Prevotella ruminicola 23	GH105|GH28	NO	NO		D5ET13
comp9680_c0_seq1 len=5318 path=[1:0-2556 16470:2557-2615 2558:2616-2822 15956:2823-2881 2765:2882-3444 17170:3445-3448 15769:3449-3532 3332:3533-3943 3817:3944-5317]	5318	DUF3237	ADE82894.1	1609	Glyco_hydro_28|Glyco_hydro_88	Prevotella ruminicola 23	GH105|GH28	NO	NO		D5ET13
comp9680_c0_seq34 len=7882 path=[1:0-2556 2558:2557-2763 2765:2764-3326 17170:3327-3330 15769:3331-3414 3332:3415-3825 3743:3826-3899 3817:3900-5273 5191:5274-5828 5746:5829-7390 7308:7391-7606 7524:7607-7881]	7882	DUF3237	ADE82894.1	1609	Glyco_hydro_28|Glyco_hydro_88	Prevotella ruminicola 23	GH105|GH28	NO	NO		D5ET13
comp9680_c0_seq16 len=7467 path=[1:0-2556 2558:2557-2763 15956:2764-2822 2765:2823-3385 3332:3386-3796 3817:3797-5170 16878:5171-5249 5191:5250-5804 16549:5805-5904 5746:5905-7466]	7467	DUF3237	ADE82894.1	1609	Glyco_hydro_28|Glyco_hydro_88	Prevotella ruminicola 23	GH105|GH28	NO	NO		D5ET13
comp9680_c0_seq5 len=7570 path=[1:0-2556 2558:2557-2763 2765:2764-3326 17170:3327-3330 15769:3331-3414 3332:3415-3825 3743:3826-3899 3817:3900-5273 16878:5274-5352 5191:5353-5907 16549:5908-6007 5746:6008-7569]	7570	DUF3237	ADE82894.1	1609	Glyco_hydro_28|Glyco_hydro_88	Prevotella ruminicola 23	GH105|GH28	NO	NO		D5ET13
comp9680_c0_seq2 len=7367 path=[1:0-2556 2558:2557-2763 15956:2764-2822 2765:2823-3385 3332:3386-3796 3817:3797-5170 16878:5171-5249 5191:5250-5804 5746:5805-7366]	7367	DUF3237	ADE82894.1	1609	Glyco_hydro_28|Glyco_hydro_88	Prevotella ruminicola 23	GH105|GH28	NO	NO		D5ET13
comp9680_c0_seq18 len=7674 path=[1:0-2556 2558:2557-2763 2765:2764-3326 17170:3327-3330 15769:3331-3414 3332:3415-3825 3817:3826-5199 16878:5200-5278 5191:5279-5833 5746:5834-7395 16038:7396-7457 7308:7458-7673]	7674	DUF3237	ADE82894.1	1609	Glyco_hydro_28|Glyco_hydro_88	Prevotella ruminicola 23	GH105|GH28	NO	NO		D5ET13
comp9680_c0_seq39 len=5879 path=[1:0-2556 2558:2557-2763 15956:2764-2822 2765:2823-3385 3332:3386-3796 3743:3797-3870 3817:3871-5244 16878:5245-5323 5191:5324-5878]	5879	DUF3237	ADE82894.1	1609	Glyco_hydro_28|Glyco_hydro_88	Prevotella ruminicola 23	GH105|GH28	NO	NO		D5ET13
comp9680_c0_seq33 len=8042 path=[1:0-2556 2558:2557-2763 2765:2764-3326 3332:3327-3737 3743:3738-3811 3817:3812-5185 16878:5186-5264 5191:5265-5819 16549:5820-5919 5746:5920-7481 7308:7482-7697 16300:7698-7766 7524:7767-8041]	8042	DUF3237	ADE82894.1	1609	Glyco_hydro_28|Glyco_hydro_88	Prevotella ruminicola 23	GH105|GH28	NO	NO		D5ET13
comp9680_c0_seq28 len=5814 path=[1:0-2556 16470:2557-2615 2558:2616-2822 2765:2823-3385 17170:3386-3389 15769:3390-3473 3332:3474-3884 3817:3885-5258 5191:5259-5813]	5814	DUF3237	ADE82894.1	1609	Glyco_hydro_28|Glyco_hydro_88	Prevotella ruminicola 23	GH105|GH28	NO	NO		D5ET13
comp9680_c0_seq27 len=7288 path=[1:0-2556 2558:2557-2763 15956:2764-2822 2765:2823-3385 3332:3386-3796 3817:3797-5170 5191:5171-5725 5746:5726-7287]	7288	DUF3237	ADE82894.1	1609	Glyco_hydro_28|Glyco_hydro_88	Prevotella ruminicola 23	GH105|GH28	NO	NO		D5ET13
comp9680_c0_seq8 len=7782 path=[1:0-2556 2558:2557-2763 2765:2764-3326 3332:3327-3737 3817:3738-5111 5191:5112-5666 5746:5667-7228 16038:7229-7290 7308:7291-7506 7524:7507-7781]	7782	DUF3237	ADE82894.1	1609	Glyco_hydro_28|Glyco_hydro_88	Prevotella ruminicola 23	GH105|GH28	NO	NO		D5ET13
comp9680_c0_seq43 len=5888 path=[1:0-2556 2558:2557-2763 15956:2764-2822 2765:2823-3385 17170:3386-3389 15769:3390-3473 3332:3474-3884 3743:3885-3958 3817:3959-5332 5191:5333-5887]	5888	DUF3237	ADE82894.1	1609	Glyco_hydro_28|Glyco_hydro_88	Prevotella ruminicola 23	GH105|GH28	NO	NO		D5ET13
comp9680_c0_seq21 len=7586 path=[1:0-2556 2558:2557-2763 2765:2764-3326 3332:3327-3737 3817:3738-5111 16878:5112-5190 5191:5191-5745 5746:5746-7307 16038:7308-7369 7308:7370-7585]	7586	DUF3237	ADE82894.1	1609	Glyco_hydro_28|Glyco_hydro_88	Prevotella ruminicola 23	GH105|GH28	NO	NO		D5ET13
comp9680_c0_seq50 len=7877 path=[1:0-2556 2558:2557-2763 2765:2764-3326 17170:3327-3330 15769:3331-3414 3332:3415-3825 3817:3826-5199 5191:5200-5754 5746:5755-7316 7308:7317-7532 16300:7533-7601 7524:7602-7876]	7877	DUF3237	ADE82894.1	1609	Glyco_hydro_28|Glyco_hydro_88	Prevotella ruminicola 23	GH105|GH28	NO	NO		D5ET13
comp9680_c0_seq14 len=7820 path=[1:0-2556 2558:2557-2763 2765:2764-3326 3332:3327-3737 3817:3738-5111 5191:5112-5666 16549:5667-5766 5746:5767-7328 7308:7329-7544 7524:7545-7819]	7820	DUF3237	ADE82894.1	1609	Glyco_hydro_28|Glyco_hydro_88	Prevotella ruminicola 23	GH105|GH28	NO	NO		D5ET13
comp9680_c0_seq53 len=5333 path=[1:0-2556 16470:2557-2615 2558:2616-2822 2765:2823-3385 17170:3386-3389 15769:3390-3473 3332:3474-3884 3743:3885-3958 3817:3959-5332]	5333	DUF3237	ADE82894.1	1609	Glyco_hydro_28|Glyco_hydro_88	Prevotella ruminicola 23	GH105|GH28	NO	NO		D5ET13
comp9680_c0_seq31 len=7889 path=[1:0-2556 2558:2557-2763 2765:2764-3326 3332:3327-3737 3817:3738-5111 5191:5112-5666 16549:5667-5766 5746:5767-7328 7308:7329-7544 16300:7545-7613 7524:7614-7888]	7889	DUF3237	ADE82894.1	1609	Glyco_hydro_28|Glyco_hydro_88	Prevotella ruminicola 23	GH105|GH28	NO	NO		D5ET13
comp9680_c0_seq26 len=7942 path=[1:0-2556 2558:2557-2763 2765:2764-3326 3332:3327-3737 3743:3738-3811 3817:3812-5185 16878:5186-5264 5191:5265-5819 5746:5820-7381 7308:7382-7597 16300:7598-7666 7524:7667-7941]	7942	DUF3237	ADE82894.1	1609	Glyco_hydro_28|Glyco_hydro_88	Prevotella ruminicola 23	GH105|GH28	NO	NO		D5ET13
comp9680_c0_seq15 len=5893 path=[1:0-2556 2558:2557-2763 15956:2764-2822 2765:2823-3385 17170:3386-3389 15769:3390-3473 3332:3474-3884 3817:3885-5258 16878:5259-5337 5191:5338-5892]	5893	DUF3237	ADE82894.1	1609	Glyco_hydro_28|Glyco_hydro_88	Prevotella ruminicola 23	GH105|GH28	NO	NO		D5ET13
comp9680_c0_seq47 len=7491 path=[1:0-2556 2558:2557-2763 2765:2764-3326 17170:3327-3330 15769:3331-3414 3332:3415-3825 3743:3826-3899 3817:3900-5273 5191:5274-5828 16549:5829-5928 5746:5929-7490]	7491	DUF3237	ADE82894.1	1609	Glyco_hydro_28|Glyco_hydro_88	Prevotella ruminicola 23	GH105|GH28	NO	NO		D5ET13
comp9680_c0_seq32 len=7362 path=[1:0-2556 2558:2557-2763 15956:2764-2822 2765:2823-3385 3332:3386-3796 3743:3797-3870 3817:3871-5244 5191:5245-5799 5746:5800-7361]	7362	DUF3237	ADE82894.1	1609	Glyco_hydro_28|Glyco_hydro_88	Prevotella ruminicola 23	GH105|GH28	NO	NO		D5ET13
comp9680_c0_seq60 len=5726 path=[1:0-2556 16470:2557-2615 2558:2616-2822 2765:2823-3385 3332:3386-3796 3817:3797-5170 5191:5171-5725]	5726	DUF3237	ADE82894.1	1609	Glyco_hydro_28|Glyco_hydro_88	Prevotella ruminicola 23	GH105|GH28	NO	NO		D5ET13
comp9680_c0_seq35 len=7681 path=[1:0-2556 2558:2557-2763 2765:2764-3326 3332:3327-3737 3743:3738-3811 3817:3812-5185 5191:5186-5740 16549:5741-5840 5746:5841-7402 16038:7403-7464 7308:7465-7680]	7681	DUF3237	ADE82894.1	1609	Glyco_hydro_28|Glyco_hydro_88	Prevotella ruminicola 23	GH105|GH28	NO	NO		D5ET13
comp9680_c0_seq40 len=7968 path=[1:0-2556 2558:2557-2763 2765:2764-3326 3332:3327-3737 3817:3738-5111 16878:5112-5190 5191:5191-5745 16549:5746-5845 5746:5846-7407 7308:7408-7623 16300:7624-7692 7524:7693-7967]	7968	DUF3237	ADE82894.1	1609	Glyco_hydro_28|Glyco_hydro_88	Prevotella ruminicola 23	GH105|GH28	NO	NO		D5ET13
comp9680_c0_seq30 len=7660 path=[1:0-2556 2558:2557-2763 2765:2764-3326 3332:3327-3737 3743:3738-3811 3817:3812-5185 16878:5186-5264 5191:5265-5819 5746:5820-7381 16038:7382-7443 7308:7444-7659]	7660	DUF3237	ADE82894.1	1609	Glyco_hydro_28|Glyco_hydro_88	Prevotella ruminicola 23	GH105|GH28	NO	NO		D5ET13
comp9680_c0_seq20 len=7973 path=[1:0-2556 2558:2557-2763 2765:2764-3326 3332:3327-3737 3743:3738-3811 3817:3812-5185 16878:5186-5264 5191:5265-5819 16549:5820-5919 5746:5920-7481 7308:7482-7697 7524:7698-7972]	7973	DUF3237	ADE82894.1	1609	Glyco_hydro_28|Glyco_hydro_88	Prevotella ruminicola 23	GH105|GH28	NO	NO		D5ET13
comp9680_c0_seq4 len=7863 path=[1:0-2556 2558:2557-2763 2765:2764-3326 3332:3327-3737 3743:3738-3811 3817:3812-5185 5191:5186-5740 5746:5741-7302 7308:7303-7518 16300:7519-7587 7524:7588-7862]	7863	DUF3237	ADE82894.1	1609	Glyco_hydro_28|Glyco_hydro_88	Prevotella ruminicola 23	GH105|GH28	NO	NO		D5ET13
comp9680_c0_seq51 len=5392 path=[1:0-2556 16470:2557-2615 2558:2616-2822 15956:2823-2881 2765:2882-3444 17170:3445-3448 15769:3449-3532 3332:3533-3943 3743:3944-4017 3817:4018-5391]	5392	DUF3237	ADE82894.1	1609	Glyco_hydro_28|Glyco_hydro_88	Prevotella ruminicola 23	GH105|GH28	NO	NO		D5ET13
comp9680_c0_seq36 len=7496 path=[1:0-2556 2558:2557-2763 2765:2764-3326 17170:3327-3330 15769:3331-3414 3332:3415-3825 3817:3826-5199 16878:5200-5278 5191:5279-5833 16549:5834-5933 5746:5934-7495]	7496	DUF3237	ADE82894.1	1609	Glyco_hydro_28|Glyco_hydro_88	Prevotella ruminicola 23	GH105|GH28	NO	NO		D5ET13
comp9680_c0_seq13 len=7720 path=[1:0-2556 2558:2557-2763 2765:2764-3326 3332:3327-3737 3817:3738-5111 5191:5112-5666 5746:5667-7228 7308:7229-7444 7524:7445-7719]	7720	DUF3237	ADE82894.1	1609	Glyco_hydro_28|Glyco_hydro_88	Prevotella ruminicola 23	GH105|GH28	NO	NO		D5ET13
comp9680_c0_seq41 len=7899 path=[1:0-2556 2558:2557-2763 2765:2764-3326 3332:3327-3737 3817:3738-5111 16878:5112-5190 5191:5191-5745 16549:5746-5845 5746:5846-7407 7308:7408-7623 7524:7624-7898]	7899	DUF3237	ADE82894.1	1609	Glyco_hydro_28|Glyco_hydro_88	Prevotella ruminicola 23	GH105|GH28	NO	NO		D5ET13
comp9680_c0_seq44 len=7388 path=[1:0-2556 2558:2557-2763 15956:2764-2822 2765:2823-3385 3332:3386-3796 3817:3797-5170 5191:5171-5725 16549:5726-5825 5746:5826-7387]	7388	DUF3237	ADE82894.1	1609	Glyco_hydro_28|Glyco_hydro_88	Prevotella ruminicola 23	GH105|GH28	NO	NO		D5ET13
comp9680_c0_seq25 len=7963 path=[1:0-2556 2558:2557-2763 2765:2764-3326 3332:3327-3737 3743:3738-3811 3817:3812-5185 5191:5186-5740 16549:5741-5840 5746:5841-7402 7308:7403-7618 16300:7619-7687 7524:7688-7962]	7963	DUF3237	ADE82894.1	1609	Glyco_hydro_28|Glyco_hydro_88	Prevotella ruminicola 23	GH105|GH28	NO	NO		D5ET13
comp9680_c0_seq11 len=7686 path=[1:0-2556 2558:2557-2763 2765:2764-3326 3332:3327-3737 3817:3738-5111 16878:5112-5190 5191:5191-5745 16549:5746-5845 5746:5846-7407 16038:7408-7469 7308:7470-7685]	7686	DUF3237	ADE82894.1	1609	Glyco_hydro_28|Glyco_hydro_88	Prevotella ruminicola 23	GH105|GH28	NO	NO		D5ET13
comp9680_c0_seq23 len=7612 path=[1:0-2556 2558:2557-2763 2765:2764-3326 17170:3327-3330 15769:3331-3414 3332:3415-3825 3817:3826-5199 16878:5200-5278 5191:5279-5833 5746:5834-7395 7308:7396-7611]	7612	DUF3237	ADE82894.1	1609	Glyco_hydro_28|Glyco_hydro_88	Prevotella ruminicola 23	GH105|GH28	NO	NO		D5ET13
comp9680_c0_seq54 len=7581 path=[1:0-2556 2558:2557-2763 2765:2764-3326 3332:3327-3737 3743:3738-3811 3817:3812-5185 5191:5186-5740 5746:5741-7302 16038:7303-7364 7308:7365-7580]	7581	DUF3237	ADE82894.1	1609	Glyco_hydro_28|Glyco_hydro_88	Prevotella ruminicola 23	GH105|GH28	NO	NO		D5ET13
comp72840_c0_seq1 len=552 path=[530:0-551]	552	GFO_IDH_MocA	ADV82261.1	NA	n/a	Terriglobus saanensis SP1PR4	GH109	n/a	n/a		E1N4Q2
comp3684_c0_seq2 len=1308 path=[1286:0-735 2022:736-1307]	1308	Glyco_hydro_11	AFG19439.1	238	Glyco_hydro_11	Pseudallescheria sp. JSM-2	GH11	YES	NO	3.2.1.8
comp9273_c0_seq11 len=4447 path=[4573:0-2750 7324:2751-3248 7822:3249-3518 8092:3519-3588 8257:3589-4046 8768:4047-4446]	4447	Glyco_hydro_11|Peptidase_S8	ABY61040.1	229	Glyco_hydro_11	Annulohypoxylon stygium HB63	GH11	NO	NO	3.2.1.8	B0FX61
comp9273_c0_seq14 len=4500 path=[4573:0-2750 7324:2751-3248 7822:3249-3518 8092:3519-3588 8257:3589-4046 8715:4047-4099 8768:4100-4499]	4500	Glyco_hydro_11|Peptidase_S8	ABY61040.1	229	Glyco_hydro_11	Annulohypoxylon stygium HB63	GH11	NO	NO	3.2.1.8	B0FX61
comp9194_c0_seq1 len=2182 path=[1:0-240 242:241-597 599:598-980 982:981-2181]	2182	Glyco_hydro_11	AEO68571.1	236	Glyco_hydro_11	Thielavia terrestris NRRL 8126	GH11	YES	NO
comp9194_c0_seq1 len=2182 path=[1:0-240 242:241-597 599:598-980 982:981-2181]	2182	Glyco_hydro_11	AEO54512.1	239	Glyco_hydro_11	Myceliophthora thermophila ATCC 42464	GH11	YES	NO
comp27943_c0_seq1 len=1058 path=[1:0-1057]	1058	Glyco_hydro_11	CAA90073.1	238	Glyco_hydro_11	Emericella nidulans	GH11	YES	NO	3.2.1.8	P55332
comp3684_c0_seq1 len=1398 path=[1286:0-735 2707:736-825 2022:826-1397]	1398	Glyco_hydro_11	AFG19439.1	238	Glyco_hydro_11	Pseudallescheria sp. JSM-2	GH11	YES	NO	3.2.1.8
comp157455_c0_seq1 len=420 path=[398:0-419]	420	Glyco_hydro_11	AEO60386.1	159	Glyco_hydro_11	Myceliophthora thermophila ATCC 42464	GH11	YES	NO
comp9273_c0_seq2 len=4595 path=[4573:0-2750 7324:2751-3248 7822:3249-3518 8092:3519-3588 8162:3589-3599 8173:3600-3683 8257:3684-4141 8715:4142-4194 8768:4195-4594]	4595	Glyco_hydro_11|Peptidase_S8	ABY61040.1	229	Glyco_hydro_11	Annulohypoxylon stygium HB63	GH11	NO	NO	3.2.1.8	B0FX61
comp9194_c0_seq2 len=2212 path=[1:0-240 242:241-597 599:598-980 4705:981-992 4351:993-1010 982:1011-2211]	2212	Glyco_hydro_11	AEO68571.1	236	Glyco_hydro_11	Thielavia terrestris NRRL 8126	GH11	YES	NO
comp9194_c0_seq2 len=2212 path=[1:0-240 242:241-597 599:598-980 4705:981-992 4351:993-1010 982:1011-2211]	2212	Glyco_hydro_11	AEO54512.1	239	Glyco_hydro_11	Myceliophthora thermophila ATCC 42464	GH11	YES	NO
comp9273_c0_seq17 len=4514 path=[4573:0-2750 7324:2751-3248 7822:3249-3518 8173:3519-3602 8257:3603-4060 8715:4061-4113 8768:4114-4513]	4514	Glyco_hydro_11|Peptidase_S8	ABY61040.1	229	Glyco_hydro_11	Annulohypoxylon stygium HB63	GH11	NO	NO	3.2.1.8	B0FX61
comp9273_c0_seq1 len=4461 path=[4573:0-2750 7324:2751-3248 7822:3249-3518 8173:3519-3602 8257:3603-4060 8768:4061-4460]	4461	Glyco_hydro_11|Peptidase_S8	ABY61040.1	229	Glyco_hydro_11	Annulohypoxylon stygium HB63	GH11	NO	NO	3.2.1.8	B0FX61
comp5452_c0_seq1 len=3560 path=[3538:0-1544 5083:1545-3559]	3560	Glyco_hydro_11	AFY98621.1	232	Glyco_hydro_11	Bispora antennata CBS 126 38	GH11	YES	NO	3.2.1.8
comp29932_c0_seq1 len=272 path=[250:0-271]	272	Glyco_hydro_11	CAA90073.1	238	Glyco_hydro_11	Emericella nidulans	GH11	YES	YES	3.2.1.8	P55332
comp29932_c0_seq1 len=272 path=[250:0-271]	272	Glyco_hydro_11	CAJ81211.1	234	Glyco_hydro_11	Lasiodiplodia theobromae CBS 247.96	GH11	YES	YES
comp9273_c0_seq13 len=4542 path=[4573:0-2750 7324:2751-3248 7822:3249-3518 8092:3519-3588 8162:3589-3599 8173:3600-3683 8257:3684-4141 8768:4142-4541]	4542	Glyco_hydro_11|Peptidase_S8	ABY61040.1	229	Glyco_hydro_11	Annulohypoxylon stygium HB63	GH11	NO	NO	3.2.1.8	B0FX61
comp164028_c0_seq1 len=677 path=[1:0-676]	677	Glyco_hydro_11	AEV23009.1	326	Glyco_hydro_11	Aspergillus niveus PR-2	GH11	YES	NO	3.2.1.8
comp164413_c0_seq1 len=366 path=[1:0-365]	366	Glyco_hydro_11	ADV31286.1	323	Glyco_hydro_11	Penicillium oxalicum B3-11-2	GH11|CBM1	YES	YES	3.2.1.8
comp3056_c0_seq1 len=1304 path=[1:0-241 243:242-1303]	1304	CBM_1	AAG44994.1	303	Glyco_hydro_11	Phanerochaete chrysosporium ME446	GH11|CBM1	NO	NO	3.2.1.8	Q9HEY9Q9HEZ0
comp3056_c0_seq2 len=1363 path=[1:0-241 2668:242-300 243:301-1362]	1363	CBM_1	AAG44994.1	303	Glyco_hydro_11	Phanerochaete chrysosporium ME446	GH11|CBM1	NO	NO	3.2.1.8	Q9HEY9Q9HEZ0
comp2827_c0_seq1 len=4118 path=[4096:0-4117]	4118	DUF297	AEO68168.1	NA	n/a	Thielavia terrestris NRRL 8126	GH114	n/a	n/a
comp9670_c0_seq1 len=9475 path=[9393:0-1144 18999:1145-1204 10538:1205-6821 16155:6822-7723 19610:7724-7728 17062:7729-7790 17124:7791-7793 17127:7794-9474]	9475	n/a	AEO59811.1	NA	n/a	Myceliophthora thermophila ATCC 42464	GH115	n/a	n/a
comp9670_c0_seq3 len=9405 path=[9393:0-1144 18999:1145-1204 10538:1205-6821 16155:6822-7723 17127:7724-9404]	9405	n/a	AEO59811.1	NA	n/a	Myceliophthora thermophila ATCC 42464	GH115	n/a	n/a
comp9670_c0_seq4 len=9345 path=[9393:0-1144 10538:1145-6761 16155:6762-7663 17127:7664-9344]	9345	n/a	AEO59811.1	NA	n/a	Myceliophthora thermophila ATCC 42464	GH115	n/a	n/a
comp9670_c0_seq2 len=9415 path=[9393:0-1144 10538:1145-6761 16155:6762-7663 19610:7664-7668 17062:7669-7730 17124:7731-7733 17127:7734-9414]	9415	n/a	AEO59811.1	NA	n/a	Myceliophthora thermophila ATCC 42464	GH115	n/a	n/a
comp9329_c0_seq2 len=6037 path=[6015:0-520 6536:521-1097 7113:1098-2209 8225:2210-4404 10420:4405-6036]	6037	NUDIX|OPT	ADY51000.1	NA	n/a	Pedobacter saltans DSM 12145	GH117	n/a	n/a
comp9329_c0_seq3 len=5098 path=[12029:0-158 7113:159-1270 8225:1271-3465 10420:3466-5097]	5098	OPT	ADY51000.1	NA	n/a	Pedobacter saltans DSM 12145	GH117	n/a	n/a
comp9329_c0_seq1 len=6271 path=[6015:0-520 12367:521-754 6536:755-1331 7113:1332-2443 8225:2444-4638 10420:4639-6270]	6271	NUDIX|OPT	ADY51000.1	NA	n/a	Pedobacter saltans DSM 12145	GH117	n/a	n/a
comp10265_c0_seq1 len=2721 path=[2722:0-2710 5433:2711-2720]	2721	Glyco_hydro_12	CAL48345.1	251	Glyco_hydro_12	Stachybotrys chartarum CECT 20565 / Stachybotrys atra BP-A	GH12	YES	NO		Q08HM8
comp4482_c0_seq1 len=3844 path=[1:0-3843]	3844	Abhydrolase_1|Abhydrolase_6|Peptidase_M16_C|Peptidase_M16	ABA56022.1	629	Peptidase_M16	Sinorhizobium meliloti	GH12	NO	NO		Q1WLH8
comp2946_c0_seq2 len=1661 path=[1:0-1577 4162:1578-1660]	1661	DUF1237	AEO55165.1	561	DUF1237	Myceliophthora thermophila ATCC 42464	GH125	YES	NO
comp6336_c0_seq2 len=1696 path=[1:0-467 469:468-1415 1417:1416-1628 1630:1629-1695]	1696	DUF1237	CCD45801.1	529	DUF1237	Botryotinia fuckeliana	GH125	YES	NO
comp6810_c0_seq1 len=1239 path=[2619:0-1092 5260:1093-1238]	1239	DUF1237	CCA39137.1	567	DUF1237	Pichia pastoris CBS 7435	GH125	YES	NO
comp6810_c0_seq1 len=1239 path=[2619:0-1092 5260:1093-1238]	1239	DUF1237	CAY71066.1	582	DUF1237	Pichia pastoris GS115	GH125	YES	NO
comp9486_c0_seq4 len=16784 path=[1:0-6756 6758:6757-8113 8115:8114-8203 8205:8204-8355 8432:8356-8722 8799:8723-16783]	16784	Init_tRNA_PT|DUF2434|DnaJ_C|DnaJ|DUF1237|DUF4185|MFS_1|Sugar_tr	AEO64752.1	541	DUF1237	Thielavia terrestris NRRL 8126	GH125	NO	NO
comp6336_c0_seq4 len=1751 path=[1:0-467 3490:468-522 469:523-1470 1417:1471-1683 1630:1684-1750]	1751	DUF1237|DUF1237	CCD45801.1	529	DUF1237	Botryotinia fuckeliana	GH125	NO	NO
comp2946_c0_seq1 len=2092 path=[1:0-1577 1579:1578-2091]	2092	DUF1237	AEO55165.1	561	DUF1237	Myceliophthora thermophila ATCC 42464	GH125	YES	NO
comp9486_c0_seq1 len=16859 path=[1:0-6756 6758:6757-8113 8115:8114-8203 8205:8204-8355 8357:8356-8422 8424:8423-8430 8432:8431-8797 8799:8798-16858]	16859	Init_tRNA_PT|DUF2434|DnaJ_C|DnaJ|DUF1237|DUF4185|MFS_1|Sugar_tr	AEO64752.1	541	DUF1237	Thielavia terrestris NRRL 8126	GH125	NO	NO
comp6810_c0_seq2 len=2641 path=[2619:0-1092 3712:1093-2106 4726:2107-2640]	2641	DUF1237	EDJ99431.1	563	DUF1237	Magnaporthe grisea 70-15	GH125	YES	NO
comp6336_c0_seq3 len=1824 path=[1:0-467 469:468-1415 3717:1416-1543 1417:1544-1756 1630:1757-1823]	1824	DUF1237|DUF1237	CCD45801.1	529	DUF1237	Botryotinia fuckeliana	GH125	NO	NO
comp6336_c0_seq1 len=1879 path=[1:0-467 3490:468-522 469:523-1470 3717:1471-1598 1417:1599-1811 1630:1812-1878]	1879	DUF1237|DUF1237|DUF1237	CCD45801.1	529	DUF1237	Botryotinia fuckeliana	GH125	NO	NO
comp9486_c0_seq3 len=16769 path=[1:0-6756 6758:6757-8113 8205:8114-8265 8357:8266-8332 8424:8333-8340 8432:8341-8707 8799:8708-16768]	16769	Init_tRNA_PT|DUF2434|DnaJ_C|DnaJ|DUF1237|DUF4185|MFS_1|Sugar_tr	AEO64752.1	541	DUF1237	Thielavia terrestris NRRL 8126	GH125	NO	NO
comp9486_c0_seq2 len=16694 path=[1:0-6756 6758:6757-8113 8205:8114-8265 8432:8266-8632 8799:8633-16693]	16694	Init_tRNA_PT|DUF2434|DnaJ_C|DnaJ|DUF1237|DUF4185|MFS_1|Sugar_tr	AEO64752.1	541	DUF1237	Thielavia terrestris NRRL 8126	GH125	NO	NO
comp22854_c0_seq1 len=1503 path=[1481:0-1502]	1503	Glyco_hydro_cc	CCT61160.1	346	Glyco_hydro_cc	Leptosphaeria maculans JN3	GH128	YES	NO
comp9378_c0_seq1 len=6412 path=[1:0-86 88:87-6079 6081:6080-6411]	6412	Glyco_hydro_cc|TRAPPC10	CCT61160.1	346	Glyco_hydro_cc	Leptosphaeria maculans JN3	GH128	NO	NO
comp9819_c0_seq1 len=2027 path=[2005:0-2026]	2027	Glyco_hydro_cc	EDJ97091.1	444	Glyco_hydro_cc	Magnaporthe grisea 70-15	GH128	YES	NO		A4QYH8
comp3352_c0_seq1 len=1209 path=[1187:0-1208]	1209	Glyco_hydro_cc	ADV24908.1	280	Glyco_hydro_cc	Cryptococcus bacillisporus WM276	GH128	YES	NO
comp9378_c0_seq2 len=6477 path=[1:0-86 12890:87-151 88:152-6144 6081:6145-6476]	6477	Glyco_hydro_cc|TRAPPC10	CCT61160.1	346	Glyco_hydro_cc	Leptosphaeria maculans JN3	GH128	NO	NO
comp11272_c0_seq1 len=1846 path=[1:0-1845]	1846	Glyco_hydro_cc	AEO67388.1	338	Glyco_hydro_cc	Thielavia terrestris NRRL 8126	GH128	YES	NO
comp10995_c0_seq1 len=4197 path=[1:0-4196]	4197	NAD_binding_7|Alpha-amylase	ADP75911.1	575	Alpha-amylase	Geobacillus sp. Y4.1MC1	GH13	NO	NO		E3IEG0
comp10995_c0_seq1 len=4197 path=[1:0-4196]	4197	NAD_binding_7|Alpha-amylase	AEH49158.1	575	Alpha-amylase	Geobacillus thermoglucosidasius C56-YS93	GH13	NO	NO
comp3136_c0_seq2 len=1954 path=[1932:0-1690 3623:1691-1953]	1954	n/a	AEA20481.1	734	Alpha-amylase	Prevotella denticola F0289	GH13	n/a	NO
comp7311_c0_seq2 len=2391 path=[2437:0-928 3366:929-1496 4002:1497-2390]	2391	Alpha-amylase	CCG44821.1	578	Alpha-amylase	Halobacillus halophilus DSM 2266 type strain: DSM 2266	GH13	YES	NO
comp6755_c0_seq2 len=1790 path=[1768:0-209 1978:210-1049 2818:1050-1789]	1790	Alpha-amylase	ACX68263.1	502	Alpha-amylase	Paenibacillus sp. Y412MC10	GH13	YES	NO		D3EGB3
comp3136_c0_seq1 len=2026 path=[1932:0-1690 3975:1691-1762 3623:1763-2025]	2026	n/a	AEA20481.1	734	Alpha-amylase	Prevotella denticola F0289	GH13	n/a	NO
comp6755_c0_seq1 len=799 path=[3640:0-58 2818:59-798]	799	n/a	AEB28768.1	499	Alpha-amylase	Carnobacterium sp. 17-4	GH13	n/a	NO
comp7311_c0_seq1 len=2459 path=[2437:0-928 3366:929-1496 3934:1497-1564 4002:1565-2458]	2459	Alpha-amylase|Alpha-amylase	CCH90872.1	576	Alpha-amylase	Modestobacter marinus BC501	GH13	NO	NO
comp8974_c0_seq1 len=8538 path=[1:0-2214 2216:2215-2303 2305:2304-2304 2306:2305-8537]	8538	GDE_C	ACL02592.1	1443	GDE_N|GDE_C	Desulfatibacillum alkenivorans AK-01	GH13	NO	NO		B8FI25
comp6052_c0_seq1 len=3222 path=[3200:0-3221]	3222	Cyt-b5|FAD_binding_6|NAD_binding_1	ADY51932.1	572	DUF377	Pedobacter saltans DSM 12145	GH130	NO	NO
comp8355_c0_seq2 len=938 path=[895:0-64 1059:65-209 1886:210-262 1204:263-526 1962:527-593 1468:594-937]	938	n/a	AEO69159.1	NA	n/a	Thielavia terrestris NRRL 8126	GH131	n/a	n/a
comp5285_c0_seq1 len=3910 path=[3954:0-2224 6245:2225-3909]	3910	zf-C2H2_2	AEO69159.1	NA	n/a	Thielavia terrestris NRRL 8126	GH131	n/a	n/a
comp37167_c0_seq1 len=582 path=[560:0-581]	582	n/a	AEO69159.1	NA	n/a	Thielavia terrestris NRRL 8126	GH131	n/a	n/a
comp8355_c0_seq1 len=917 path=[895:0-64 960:65-163 1059:164-308 1204:309-572 1468:573-916]	917	n/a	AEO69159.1	NA	n/a	Thielavia terrestris NRRL 8126	GH131	n/a	n/a
comp8355_c0_seq3 len=970 path=[895:0-64 960:65-163 1059:164-308 1886:309-361 1204:362-625 1468:626-969]	970	n/a	AEO69159.1	NA	n/a	Thielavia terrestris NRRL 8126	GH131	n/a	n/a
comp8355_c0_seq6 len=1037 path=[895:0-64 960:65-163 1059:164-308 1886:309-361 1204:362-625 1962:626-692 1468:693-1036]	1037	n/a	AEO69159.1	NA	n/a	Thielavia terrestris NRRL 8126	GH131	n/a	n/a
comp5285_c0_seq2 len=3976 path=[3954:0-2224 6179:2225-2290 6245:2291-3975]	3976	zf-C2H2_2	AEO69159.1	NA	n/a	Thielavia terrestris NRRL 8126	GH131	n/a	n/a
comp8355_c0_seq4 len=818 path=[895:0-64 1059:65-209 1204:210-473 1468:474-817]	818	n/a	AEO69159.1	NA	n/a	Thielavia terrestris NRRL 8126	GH131	n/a	n/a
comp2794_c0_seq1 len=1990 path=[1968:0-1989]	1990	n/a	XP_003720306.1	NA	n/a	Magnaporthe grisea 70-15	GH131	n/a	n/a
comp1967_c0_seq1 len=1099 path=[1077:0-1098]	1099	n/a	EAA36411.2	NA	n/a	Neurospora crassa OR74A	GH131	n/a	n/a
comp8355_c0_seq5 len=984 path=[895:0-64 960:65-163 1059:164-308 1204:309-572 1962:573-639 1468:640-983]	984	n/a	AEO69159.1	NA	n/a	Thielavia terrestris NRRL 8126	GH131	n/a	n/a
comp8355_c0_seq7 len=871 path=[895:0-64 1059:65-209 1886:210-262 1204:263-526 1468:527-870]	871	n/a	AEO69159.1	NA	n/a	Thielavia terrestris NRRL 8126	GH131	n/a	n/a
comp8355_c0_seq8 len=885 path=[895:0-64 1059:65-209 1204:210-473 1962:474-540 1468:541-884]	885	n/a	AEO69159.1	NA	n/a	Thielavia terrestris NRRL 8126	GH131	n/a	n/a
comp4607_c0_seq2 len=3214 path=[3136:0-1781 6419:1782-1837 4918:1838-3213]	3214	SUN|SUN	CCD55279.1	541	SUN	Botryotinia fuckeliana	GH132	NO	NO
comp5833_c0_seq1 len=3314 path=[1:0-3313]	3314	FCH|C1_1	CBX98831.1	1458	FCH|SUN	Leptosphaeria maculans v23.1.3	GH132	NO	NO		E5A5D3
comp4136_c0_seq1 len=4481 path=[4459:0-2151 6611:2152-4480]	4481	SUN	AEO65351.1	435	SUN	Thielavia terrestris NRRL 8126	GH132	YES	NO
comp4607_c0_seq1 len=3158 path=[3136:0-1781 4918:1782-3157]	3158	SUN	CCD55279.1	541	SUN	Botryotinia fuckeliana	GH132	YES	NO
comp5466_c1_seq1 len=1310 path=[9469:0-4 9478:5-1285 10759:1286-1309]	1310	FCH	CBX98831.1	1458	FCH|SUN	Leptosphaeria maculans v23.1.3	GH132	NO	YES		E5A5D3
comp37703_c0_seq1 len=1119 path=[1:0-1118]	1119	n/a	CAP69519.1	717	Glyco_hydro_15	Podospora anserina S mat+	GH15	n/a	NO		B2AYP5
comp499412_c0_seq1 len=298 path=[276:0-297]	298	n/a	EAA66118.1	NA	n/a	Aspergillus nidulans FGSC A4	GH16	n/a	n/a		C8VUK9Q5BGT5
comp130612_c0_seq1 len=520 path=[1:0-519]	520	n/a	AAE53061.1	305	Glyco_hydro_16	Trichoderma harzianum CBS 243.71	GH16	n/a	NO	3.2.1.6
comp9016_c1_seq6 len=3420 path=[4512:0-66 7762:67-278 4579:279-492 4793:493-555 4856:556-567 4868:568-3419]	3420	Fungal_trans	EAA57990.1	1438	SKN1|Fungal_trans	Aspergillus nidulans FGSC A4	GH16	NO	NO		Q5AZS6
comp12129_c0_seq1 len=3420 path=[1:0-3419]	3420	Fungal_trans	EAA57990.1	1438	SKN1|Fungal_trans	Aspergillus nidulans FGSC A4	GH16	NO	NO		Q5AZS6
comp9355_c0_seq7 len=1877 path=[8661:0-83 6219:84-578 6714:579-1199 7335:1200-1270 7406:1271-1279 7415:1280-1732 7868:1733-1785 7921:1786-1876]	1877	n/a	AEO55983.1	NA	n/a	Myceliophthora thermophila ATCC 42464	GH16	n/a	n/a
comp11248_c0_seq1 len=3802 path=[3780:0-3801]	3802	Glyco_hydro_16	CAP65576.1	627	Glyco_hydro_16	Podospora anserina S mat+	GH16	YES	NO		B2ANF2
comp9355_c0_seq1 len=1811 path=[8661:0-83 6219:84-578 8856:579-645 6714:646-1266 7415:1267-1719 7921:1720-1810]	1811	n/a	AEO55983.1	NA	n/a	Myceliophthora thermophila ATCC 42464	GH16	n/a	n/a
comp7672_c0_seq1 len=2630 path=[1:0-1347 1349:1348-1592 1594:1593-2159 2161:2160-2361 2363:2362-2629]	2630	Glyco_hydro_7|Glyco_hydro_16	AAE53061.1	305	Glyco_hydro_16	Trichoderma harzianum CBS 243.71	GH16	NO	NO	3.2.1.6
comp9355_c0_seq12 len=2518 path=[2905:0-35 2941:36-63 2969:64-134 3040:135-142 9101:143-159 5654:160-724 6219:725-1219 6714:1220-1840 7335:1841-1911 7406:1912-1920 7415:1921-2373 7868:2374-2426 7921:2427-2517]	2518	n/a	AEO55983.1	NA	n/a	Myceliophthora thermophila ATCC 42464	GH16	n/a	n/a
comp9355_c0_seq15 len=1864 path=[8661:0-83 6219:84-578 8856:579-645 6714:646-1266 7415:1267-1719 7868:1720-1772 7921:1773-1863]	1864	n/a	AEO55983.1	NA	n/a	Myceliophthora thermophila ATCC 42464	GH16	n/a	n/a
comp9040_c1_seq4 len=3615 path=[1:0-774 776:775-2186 2188:2187-2649 8936:2650-2736 2651:2737-3591 10007:3592-3614]	3615	Glyco_hydro_16	EAA65962.1	417	Glyco_hydro_16	Aspergillus nidulans FGSC A4	GH16	YES	NO		Q5BEU7
comp5901_c0_seq1 len=463 path=[21:0-23 44:24-51 72:52-384 483:385-462]	463	n/a	XP_367381.1	NA	n/a	Magnaporthe grisea 70-15	GH16	n/a	n/a		G4MUZ8
comp8854_c0_seq3 len=2594 path=[2572:0-240 2813:241-460 3033:461-2593]	2594	DUF167|Glyco_hydro_16	AEO69030.1	NA	n/a	Thielavia terrestris NRRL 8126	GH16	n/a	n/a
comp9355_c0_seq4 len=1944 path=[8661:0-83 6219:84-578 8856:579-645 6714:646-1266 7335:1267-1337 7406:1338-1346 7415:1347-1799 7868:1800-1852 7921:1853-1943]	1944	n/a	AEO55983.1	NA	n/a	Myceliophthora thermophila ATCC 42464	GH16	n/a	n/a
comp9016_c1_seq5 len=3885 path=[3849:0-662 8340:663-751 4512:752-818 4579:819-1032 4868:1033-3884]	3885	Fungal_trans	EAA57990.1	1438	SKN1|Fungal_trans	Aspergillus nidulans FGSC A4	GH16	NO	NO		Q5AZS6
comp4513_c0_seq1 len=2931 path=[6:0-1317 5677:1318-1402 1324:1403-2930]	2931	n/a	AAT84251.1	NA	n/a	Fusarium graminearum F4	GH16	n/a	n/a		Q49SA8
comp7672_c0_seq2 len=2428 path=[1:0-1347 1349:1348-1592 1594:1593-2159 2363:2160-2427]	2428	Glyco_hydro_7|Glyco_hydro_16	AAE53061.1	305	Glyco_hydro_16	Trichoderma harzianum CBS 243.71	GH16	NO	NO	3.2.1.6
comp9040_c1_seq3 len=4479 path=[1:0-774 776:775-2186 2188:2187-2649 2651:2650-3504 3506:3505-4478]	4479	Glyco_hydro_16	EAA65962.1	417	Glyco_hydro_16	Aspergillus nidulans FGSC A4	GH16	YES	NO		Q5BEU7
comp3732_c0_seq1 len=2202 path=[2180:0-1955 4136:1956-2201]	2202	Glyco_hydro_16	AEO64879.1	496	Glyco_hydro_16	Thielavia terrestris NRRL 8126	GH16	YES	NO
comp4455_c0_seq1 len=300 path=[1:0-299]	300	n/a	AAE53061.1	305	Glyco_hydro_16	Trichoderma harzianum CBS 243.71	GH16	n/a	YES	3.2.1.6
comp9355_c0_seq11 len=2465 path=[2905:0-35 2941:36-63 2969:64-134 3040:135-142 9101:143-159 5654:160-724 6219:725-1219 6714:1220-1840 7335:1841-1911 7406:1912-1920 7415:1921-2373 7921:2374-2464]	2465	n/a	AEO55983.1	NA	n/a	Myceliophthora thermophila ATCC 42464	GH16	n/a	n/a
comp8377_c0_seq1 len=4125 path=[1:0-3590 3592:3591-3789 3791:3790-4124]	4125	Fungal_trans	EAA57990.1	1438	SKN1|Fungal_trans	Aspergillus nidulans FGSC A4	GH16	NO	NO		Q5AZS6
comp9355_c0_seq5 len=2438 path=[2905:0-35 2941:36-63 2969:64-134 3040:135-142 9101:143-159 5654:160-724 6219:725-1219 6714:1220-1840 7415:1841-2293 7868:2294-2346 7921:2347-2437]	2438	n/a	AEO55983.1	NA	n/a	Myceliophthora thermophila ATCC 42464	GH16	n/a	n/a
comp9016_c1_seq2 len=3796 path=[3849:0-662 4512:663-729 4579:730-943 4868:944-3795]	3796	Fungal_trans	EAA57990.1	1438	SKN1|Fungal_trans	Aspergillus nidulans FGSC A4	GH16	NO	NO		Q5AZS6
comp4900_c0_seq1 len=3617 path=[3595:0-3616]	3617	Abhydrolase_3|Glyco_hydro_16	CCD53208.1	NA	n/a	Botryotinia fuckeliana	GH16	n/a	n/a
comp8854_c0_seq1 len=2678 path=[2572:0-240 5571:241-241 5320:242-308 5281:309-324 2813:325-544 3033:545-2677]	2678	Glyco_hydro_16	AEO69030.1	NA	n/a	Thielavia terrestris NRRL 8126	GH16	n/a	n/a
comp9355_c0_seq18 len=1891 path=[8661:0-83 6219:84-578 8856:579-645 6714:646-1266 7335:1267-1337 7406:1338-1346 7415:1347-1799 7921:1800-1890]	1891	n/a	AEO55983.1	NA	n/a	Myceliophthora thermophila ATCC 42464	GH16	n/a	n/a
comp10498_c0_seq1 len=3667 path=[1:0-3666]	3667	Tim17	AEO63309.1	NA	n/a	Thielavia terrestris NRRL 8126	GH16	n/a	n/a
comp9016_c1_seq4 len=3871 path=[3849:0-662 4512:663-729 4579:730-943 4793:944-1006 4856:1007-1018 4868:1019-3870]	3871	Fungal_trans	EAA57990.1	1438	SKN1|Fungal_trans	Aspergillus nidulans FGSC A4	GH16	NO	NO		Q5AZS6
comp9355_c0_seq10 len=2452 path=[2905:0-35 2941:36-63 2969:64-134 3040:135-142 9101:143-159 5654:160-724 6219:725-1219 8856:1220-1286 6714:1287-1907 7415:1908-2360 7921:2361-2451]	2452	n/a	AEO55983.1	NA	n/a	Myceliophthora thermophila ATCC 42464	GH16	n/a	n/a
comp9016_c1_seq3 len=3345 path=[4512:0-66 7762:67-278 4579:279-492 4868:493-3344]	3345	Fungal_trans	EAA57990.1	1438	SKN1|Fungal_trans	Aspergillus nidulans FGSC A4	GH16	NO	NO		Q5AZS6
comp6833_c1_seq1 len=491 path=[3409:0-490]	491	Glyco_hydro_16	AEO58087.1	NA	n/a	Myceliophthora thermophila ATCC 42464	GH16	n/a	n/a
comp9040_c1_seq2 len=4566 path=[1:0-774 776:775-2186 2188:2187-2649 8936:2650-2736 2651:2737-3591 3506:3592-4565]	4566	Glyco_hydro_16	EAA65962.1	417	Glyco_hydro_16	Aspergillus nidulans FGSC A4	GH16	YES	NO		Q5BEU7
comp7450_c0_seq2 len=2112 path=[2092:0-170 2265:171-521 2616:522-682 2777:683-2111]	2112	Glyco_hydro_16	AEO70306.1	382	Glyco_hydro_16	Thielavia terrestris NRRL 8126	GH16	YES	NO
comp9355_c0_seq14 len=2505 path=[2905:0-35 2941:36-63 2969:64-134 3040:135-142 9101:143-159 5654:160-724 6219:725-1219 8856:1220-1286 6714:1287-1907 7415:1908-2360 7868:2361-2413 7921:2414-2504]	2505	n/a	AEO55983.1	NA	n/a	Myceliophthora thermophila ATCC 42464	GH16	n/a	n/a
comp9016_c1_seq1 len=3960 path=[3849:0-662 8340:663-751 4512:752-818 4579:819-1032 4793:1033-1095 4856:1096-1107 4868:1108-3959]	3960	Fungal_trans	EAA57990.1	1438	SKN1|Fungal_trans	Aspergillus nidulans FGSC A4	GH16	NO	NO		Q5AZS6
comp8854_c0_seq2 len=2650 path=[2572:0-240 5571:241-241 5242:242-280 5281:281-296 2813:297-516 3033:517-2649]	2650	Glyco_hydro_16	AEO69030.1	NA	n/a	Thielavia terrestris NRRL 8126	GH16	n/a	n/a
comp9355_c0_seq13 len=1797 path=[8661:0-83 6219:84-578 6714:579-1199 7415:1200-1652 7868:1653-1705 7921:1706-1796]	1797	n/a	AEO55983.1	NA	n/a	Myceliophthora thermophila ATCC 42464	GH16	n/a	n/a
comp9040_c1_seq1 len=3528 path=[1:0-774 776:775-2186 2188:2187-2649 2651:2650-3504 10007:3505-3527]	3528	Glyco_hydro_16	EAA65962.1	417	Glyco_hydro_16	Aspergillus nidulans FGSC A4	GH16	YES	NO		Q5BEU7
comp5244_c0_seq1 len=2225 path=[2203:0-294 2498:295-2224]	2225	Glyco_hydro_16	AEO59417.1	298	Glyco_hydro_16	Myceliophthora thermophila ATCC 42464	GH16	YES	NO
comp9355_c0_seq2 len=1744 path=[8661:0-83 6219:84-578 6714:579-1199 7415:1200-1652 7921:1653-1743]	1744	n/a	AEO55983.1	NA	n/a	Myceliophthora thermophila ATCC 42464	GH16	n/a	n/a
comp9355_c0_seq8 len=1824 path=[8661:0-83 6219:84-578 6714:579-1199 7335:1200-1270 7406:1271-1279 7415:1280-1732 7921:1733-1823]	1824	n/a	AEO55983.1	NA	n/a	Myceliophthora thermophila ATCC 42464	GH16	n/a	n/a
comp337612_c0_seq1 len=211 path=[217:0-210]	211	n/a	CAR53271.1	NA	n/a	Colletotrichum higginsianum IMI349061	GH16	n/a	n/a		C0M651
comp9355_c0_seq17 len=2385 path=[2905:0-35 2941:36-63 2969:64-134 3040:135-142 9101:143-159 5654:160-724 6219:725-1219 6714:1220-1840 7415:1841-2293 7921:2294-2384]	2385	n/a	AEO55983.1	NA	n/a	Myceliophthora thermophila ATCC 42464	GH16	n/a	n/a
comp145495_c0_seq1 len=328 path=[1:0-327]	328	n/a	CCD51958.1	NA	n/a	Botryotinia fuckeliana	GH16	n/a	n/a
comp4513_c0_seq2 len=2846 path=[6:0-1317 1324:1318-2845]	2846	n/a	AAT84251.1	NA	n/a	Fusarium graminearum F4	GH16	n/a	n/a		Q49SA8
comp7450_c0_seq1 len=1951 path=[2092:0-170 2265:171-521 2777:522-1950]	1951	Glyco_hydro_16	AEO70306.1	382	Glyco_hydro_16	Thielavia terrestris NRRL 8126	GH16	YES	NO
comp9355_c0_seq16 len=2585 path=[2905:0-35 2941:36-63 2969:64-134 3040:135-142 9101:143-159 5654:160-724 6219:725-1219 8856:1220-1286 6714:1287-1907 7335:1908-1978 7406:1979-1987 7415:1988-2440 7868:2441-2493 7921:2494-2584]	2585	n/a	AEO55983.1	NA	n/a	Myceliophthora thermophila ATCC 42464	GH16	n/a	n/a
comp9355_c0_seq3 len=2532 path=[2905:0-35 2941:36-63 2969:64-134 3040:135-142 9101:143-159 5654:160-724 6219:725-1219 8856:1220-1286 6714:1287-1907 7335:1908-1978 7406:1979-1987 7415:1988-2440 7921:2441-2531]	2532	n/a	AEO55983.1	NA	n/a	Myceliophthora thermophila ATCC 42464	GH16	n/a	n/a
comp4233_c0_seq1 len=2191 path=[1:0-274 276:275-2190]	2191	Glyco_hydro_16	AAQ14297.2	458	Glyco_hydro_16	Fusarium acuminatum	GH16	YES	NO
comp10068_c0_seq1 len=4132 path=[1:0-4131]	4132	Glyco_hydro_16	AEO57264.1	459	Glyco_hydro_16	Myceliophthora thermophila ATCC 42464	GH16|CBM18	YES	NO
comp6234_c0_seq2 len=1864 path=[5197:0-1446 4804:1447-1451 4803:1452-1452 9941:1453-1475 4832:1476-1863]	1864	n/a	XP_362244.1	NA	n/a	Magnaporthe grisea 70-15	GH17	n/a	n/a		G4MRA6
comp10227_c0_seq1 len=3556 path=[3534:0-3555]	3556	Glyco_hydro_17	AEO54524.1	NA	n/a	Myceliophthora thermophila ATCC 42464	GH17	n/a	n/a
comp400218_c0_seq1 len=212 path=[190:0-211]	212	n/a	CAP79943.1	NA	n/a	Penicillium chrysogenum Wisconsin 54-1255	GH17	n/a	n/a		B6H0M5
comp252656_c0_seq1 len=206 path=[184:0-205]	206	n/a	CAP91942.1	329	Glyco_hydro_17	Penicillium chrysogenum Wisconsin 54-1255	GH17	n/a	NO		B6H4G0
comp6234_c0_seq1 len=2390 path=[5197:0-1446 4804:1447-1451 4803:1452-1452 9941:1453-1475 9940:1476-2389]	2390	n/a	XP_362244.1	NA	n/a	Magnaporthe grisea 70-15	GH17	n/a	n/a		G4MRA6
comp9904_c0_seq1 len=3456 path=[1:0-3455]	3456	n/a	EAL86311.1	NA	n/a	Aspergillus fumigatus Af293	GH17	n/a	n/a
comp167790_c0_seq1 len=376 path=[1:0-375]	376	n/a	CAK47997.1	NA	n/a	Aspergillus niger CBS 513.88	GH17	n/a	n/a		A2QLK2
comp9598_c0_seq32 len=6126 path=[50973:0-5 40977:6-96 503:97-120 527:121-4045 4452:4046-6125]	6126	n/a	CAP69574.1	NA	n/a	Podospora anserina S mat+	GH17	n/a	n/a		B2AYV0
comp2225_c0_seq1 len=2205 path=[2183:0-328 2512:329-2204]	2205	Aminotran_1_2	BAE54672.1	NA	n/a	Aspergillus oryzae RIB40	GH17	n/a	n/a		Q2UUU3
comp3727_c0_seq1 len=3087 path=[1:0-3086]	3087	Aminotran_1_2	BAE54672.1	NA	n/a	Aspergillus oryzae RIB40	GH17	n/a	n/a		Q2UUU3
comp11205_c0_seq1 len=1217 path=[1195:0-1216]	1217	n/a	EAL86311.1	NA	n/a	Aspergillus fumigatus Af293	GH17	n/a	n/a
comp4165_c1_seq1 len=2379 path=[1997:0-2290 4288:2291-2378]	2379	n/a	XP_366181.1	NA	n/a	Magnaporthe grisea 70-15	GH17	n/a	n/a		G4NG95
comp3322_c0_seq2 len=1194 path=[1:0-1061 1063:1062-1090 1092:1091-1193]	1194	But2	CBX90501.1	574	But2	Leptosphaeria maculans v23.1.3	GH17	YES	NO		E4ZGT1
comp9352_c0_seq3 len=3226 path=[5837:0-359 6197:360-519 6357:520-750 6588:751-760 6598:761-1068 3703:1069-3225]	3226	Pkinase|Pkinase_Tyr	CBX99002.1	785	Pkinase	Leptosphaeria maculans v23.1.3	GH18	NO	NO		E5A5V7
comp7939_c0_seq1 len=3449 path=[1:0-266 268:267-774 6851:775-856 776:857-3448]	3449	adh_short	EAA59449.1	980	Glyco_hydro_18|adh_short	Aspergillus nidulans FGSC A4	GH18	NO	NO		Q5B652
comp4845_c0_seq1 len=3618 path=[1:0-849 851:850-3617]	3618	Aldo_ket_red|LRR_4	AEY67763.1	600	Glyco_hydro_18	Clostridium sp. BNL1100	GH18	NO	NO
comp9357_c0_seq1 len=3608 path=[4213:0-783 4997:784-837 5051:838-1562 5776:1563-2736 6950:2737-3298 7512:3299-3584 8908:3585-3607]	3608	n/a	BAJ75231.1	NA	n/a	Microbacterium testaceum StLB037	GH18	n/a	n/a
comp9583_c0_seq3 len=2411 path=[1:0-1179 1181:1180-1253 1255:1254-1433 1506:1434-1505 1578:1506-1534 6548:1535-2410]	2411	DnaJ	CCD48345.1	NA	n/a	Botryotinia fuckeliana	GH18	n/a	n/a
comp8516_c0_seq1 len=5468 path=[5446:0-2960 8407:2961-4799 10246:4800-5467]	5468	Pkinase|Pkinase_Tyr|PAT1	CBX99002.1	785	Pkinase	Leptosphaeria maculans v23.1.3	GH18	NO	NO		E5A5V7
comp367865_c0_seq1 len=346 path=[1:0-345]	346	n/a	EAA59449.1	980	Glyco_hydro_18|adh_short	Aspergillus nidulans FGSC A4	GH18	n/a	NO		Q5B652
comp9045_c0_seq8 len=7009 path=[6921:0-92 7014:93-354 7276:355-356 7278:357-563 7485:564-1979 15527:1980-2045 8901:2046-2666 9522:2667-7008]	7009	Pkinase|Pkinase_Tyr	CBX99002.1	785	Pkinase	Leptosphaeria maculans v23.1.3	GH18	NO	NO		E5A5V7
comp4684_c0_seq1 len=1827 path=[1:0-1558 1560:1559-1826]	1827	AhpC-TSA	CBA62479.1	722	AhpC-TSA|Glyco_hydro_18	Clostridium difficile CD196	GH18	NO	NO		C9XQW9
comp4684_c0_seq1 len=1827 path=[1:0-1558 1560:1559-1826]	1827	AhpC-TSA	CBE03719.1	722	AhpC-TSA|Glyco_hydro_18	Clostridium difficile R20291	GH18	NO	NO		C9YL30
comp4684_c0_seq1 len=1827 path=[1:0-1558 1560:1559-1826]	1827	AhpC-TSA	CAJ68298.1	725	AhpC-TSA|Glyco_hydro_18	Clostridium difficile 630	GH18	NO	NO		Q18BV5
comp253602_c0_seq1 len=478 path=[456:0-477]	478	KR|adh_short	EAA59449.1	980	Glyco_hydro_18|adh_short	Aspergillus nidulans FGSC A4	GH18	NO	NO		Q5B652
comp11042_c0_seq1 len=2491 path=[2469:0-2490]	2491	Pkinase_Tyr|IGR	CBX99002.1	785	Pkinase	Leptosphaeria maculans v23.1.3	GH18	NO	NO		E5A5V7
comp13143_c0_seq1 len=1716 path=[1:0-1715]	1716	n/a	AEO56266.1	NA	n/a	Myceliophthora thermophila ATCC 42464	GH18	n/a	n/a
comp5635_c0_seq1 len=2870 path=[2934:0-1909 4930:1910-2606 5627:2607-2869]	2870	Pkinase_Tyr|Pkinase	CBX99002.1	785	Pkinase	Leptosphaeria maculans v23.1.3	GH18	NO	NO		E5A5V7
comp9357_c0_seq7 len=3332 path=[4213:0-783 5051:784-1508 8531:1509-1572 5776:1573-2746 6950:2747-3308 8887:3309-3331]	3332	n/a	BAJ75231.1	NA	n/a	Microbacterium testaceum StLB037	GH18	n/a	n/a
comp11753_c0_seq1 len=4412 path=[1:0-4411]	4412	Pkinase|Pkinase_Tyr	CBX99002.1	785	Pkinase	Leptosphaeria maculans v23.1.3	GH18	NO	NO		E5A5V7
comp8594_c0_seq3 len=2213 path=[2191:0-77 6238:78-79 2271:80-311 2503:312-405 2597:406-1986 4178:1987-2212]	2213	Glyco_hydro_18	CAP59901.1	394	Glyco_hydro_18	Podospora anserina S mat+	GH18	YES	NO		B2A9Z0
comp30740_c0_seq1 len=2271 path=[1:0-2270]	2271	adh_short	EAA59449.1	980	Glyco_hydro_18|adh_short	Aspergillus nidulans FGSC A4	GH18	NO	NO		Q5B652
comp9556_c0_seq4 len=8195 path=[1:0-819 16977:820-821 16009:822-911 17000:912-914 17003:915-915 17004:916-916 16104:917-1000 823:1001-4978 4801:4979-8194]	8195	DUF3608|DEP	EAA59449.1	980	Glyco_hydro_18|adh_short	Aspergillus nidulans FGSC A4	GH18	NO	NO		Q5B652
comp9045_c0_seq5 len=7719 path=[13899:0-782 16514:783-802 7014:803-1064 7276:1065-1066 7278:1067-1273 7485:1274-2689 15527:2690-2755 8901:2756-3376 9522:3377-7718]	7719	Pkinase|Pkinase_Tyr	CBX99002.1	785	Pkinase	Leptosphaeria maculans v23.1.3	GH18	NO	NO		E5A5V7
comp9556_c0_seq2 len=8111 path=[1:0-819 16977:820-821 16009:822-911 17000:912-914 17003:915-915 17004:916-916 823:917-4894 4801:4895-8110]	8111	DUF3608|DEP	EAA59449.1	980	Glyco_hydro_18|adh_short	Aspergillus nidulans FGSC A4	GH18	NO	NO		Q5B652
comp3532_c0_seq1 len=6436 path=[6414:0-3854 10269:3855-6435]	6436	tRNA-synt_1|tRNA-synt_1_2|Anticodon_1	ABY40380.1	255	tRNA-synt_1	Pantoea dispersa	GH18	NO	NO		A9XU61
comp12605_c0_seq1 len=1926 path=[1:0-1925]	1926	n/a	BAJ75231.1	NA	n/a	Microbacterium testaceum StLB037	GH18	n/a	n/a
comp9653_c1_seq3 len=2806 path=[2708:0-1291 4000:1292-2403 5112:2404-2525 20174:2526-2601 5234:2602-2805]	2806	Na_Ca_ex	CCA23373.1	844	Na_Ca_ex|Na_Ca_ex	Albugo laibachii Nc14	GH18	NO	NO
comp9653_c1_seq3 len=2806 path=[2708:0-1291 4000:1292-2403 5112:2404-2525 20174:2526-2601 5234:2602-2805]	2806	Na_Ca_ex	CCA23362.1	829	Na_Ca_ex|Na_Ca_ex	Albugo laibachii Nc14	GH18	NO	NO
comp9653_c1_seq3 len=2806 path=[2708:0-1291 4000:1292-2403 5112:2404-2525 20174:2526-2601 5234:2602-2805]	2806	Na_Ca_ex	CCA23375.1	826	Na_Ca_ex|Na_Ca_ex	Albugo laibachii Nc14	GH18	NO	NO
comp9653_c1_seq3 len=2806 path=[2708:0-1291 4000:1292-2403 5112:2404-2525 20174:2526-2601 5234:2602-2805]	2806	Na_Ca_ex	CCA23372.1	826	Na_Ca_ex|Na_Ca_ex	Albugo laibachii Nc14	GH18	NO	NO
comp9653_c1_seq3 len=2806 path=[2708:0-1291 4000:1292-2403 5112:2404-2525 20174:2526-2601 5234:2602-2805]	2806	Na_Ca_ex	CCA23366.1	840	Na_Ca_ex|Na_Ca_ex	Albugo laibachii Nc14	GH18	NO	NO
comp9653_c1_seq3 len=2806 path=[2708:0-1291 4000:1292-2403 5112:2404-2525 20174:2526-2601 5234:2602-2805]	2806	Na_Ca_ex	CCA23370.1	819	Na_Ca_ex|Na_Ca_ex	Albugo laibachii Nc14	GH18	NO	NO
comp9653_c1_seq3 len=2806 path=[2708:0-1291 4000:1292-2403 5112:2404-2525 20174:2526-2601 5234:2602-2805]	2806	Na_Ca_ex	CCA23374.1	834	Na_Ca_ex|Na_Ca_ex	Albugo laibachii Nc14	GH18	NO	NO
comp9653_c1_seq3 len=2806 path=[2708:0-1291 4000:1292-2403 5112:2404-2525 20174:2526-2601 5234:2602-2805]	2806	Na_Ca_ex	CCA23368.1	829	Na_Ca_ex|Na_Ca_ex	Albugo laibachii Nc14	GH18	NO	NO
comp9653_c1_seq3 len=2806 path=[2708:0-1291 4000:1292-2403 5112:2404-2525 20174:2526-2601 5234:2602-2805]	2806	Na_Ca_ex	CCA23367.1	825	Na_Ca_ex|Na_Ca_ex	Albugo laibachii Nc14	GH18	NO	NO
comp9653_c1_seq3 len=2806 path=[2708:0-1291 4000:1292-2403 5112:2404-2525 20174:2526-2601 5234:2602-2805]	2806	Na_Ca_ex	CCA23369.1	825	Na_Ca_ex|Na_Ca_ex	Albugo laibachii Nc14	GH18	NO	NO
comp9653_c1_seq3 len=2806 path=[2708:0-1291 4000:1292-2403 5112:2404-2525 20174:2526-2601 5234:2602-2805]	2806	Na_Ca_ex	CCA23365.1	822	Na_Ca_ex|Na_Ca_ex	Albugo laibachii Nc14	GH18	NO	NO
comp9653_c1_seq3 len=2806 path=[2708:0-1291 4000:1292-2403 5112:2404-2525 20174:2526-2601 5234:2602-2805]	2806	Na_Ca_ex	CCA23371.1	841	Na_Ca_ex|Na_Ca_ex	Albugo laibachii Nc14	GH18	NO	NO
comp9653_c1_seq3 len=2806 path=[2708:0-1291 4000:1292-2403 5112:2404-2525 20174:2526-2601 5234:2602-2805]	2806	Na_Ca_ex	CCA23363.1	844	Na_Ca_ex|Na_Ca_ex	Albugo laibachii Nc14	GH18	NO	NO
comp9653_c1_seq3 len=2806 path=[2708:0-1291 4000:1292-2403 5112:2404-2525 20174:2526-2601 5234:2602-2805]	2806	Na_Ca_ex	CCA23364.1	841	Na_Ca_ex|Na_Ca_ex	Albugo laibachii Nc14	GH18	NO	NO
comp9357_c0_seq12 len=4235 path=[4213:0-783 4997:784-837 5051:838-1562 5776:1563-2736 6950:2737-3298 7512:3299-3584 7798:3585-4234]	4235	n/a	BAJ75231.1	NA	n/a	Microbacterium testaceum StLB037	GH18	n/a	n/a
comp9357_c0_seq4 len=3268 path=[4213:0-783 5051:784-1508 5776:1509-2682 6950:2683-3244 8887:3245-3267]	3268	n/a	BAJ75231.1	NA	n/a	Microbacterium testaceum StLB037	GH18	n/a	n/a
comp13150_c0_seq1 len=1577 path=[1555:0-1576]	1577	n/a	BAJ75231.1	NA	n/a	Microbacterium testaceum StLB037	GH18	n/a	n/a
comp6076_c0_seq2 len=5699 path=[5365:0-4700 11087:4701-4892 11279:4893-5012 10066:5013-5698]	5699	Glyoxalase_2|Glyoxalase|Glyoxalase_2|Glyoxalase|Na_Ca_ex|Na_Ca_ex	CCA23373.1	844	Na_Ca_ex|Na_Ca_ex	Albugo laibachii Nc14	GH18	NO	NO
comp6076_c0_seq2 len=5699 path=[5365:0-4700 11087:4701-4892 11279:4893-5012 10066:5013-5698]	5699	Glyoxalase_2|Glyoxalase|Glyoxalase_2|Glyoxalase|Na_Ca_ex|Na_Ca_ex	CCA23362.1	829	Na_Ca_ex|Na_Ca_ex	Albugo laibachii Nc14	GH18	NO	NO
comp6076_c0_seq2 len=5699 path=[5365:0-4700 11087:4701-4892 11279:4893-5012 10066:5013-5698]	5699	Glyoxalase_2|Glyoxalase|Glyoxalase_2|Glyoxalase|Na_Ca_ex|Na_Ca_ex	CCA23365.1	822	Na_Ca_ex|Na_Ca_ex	Albugo laibachii Nc14	GH18	NO	NO
comp6076_c0_seq2 len=5699 path=[5365:0-4700 11087:4701-4892 11279:4893-5012 10066:5013-5698]	5699	Glyoxalase_2|Glyoxalase|Glyoxalase_2|Glyoxalase|Na_Ca_ex|Na_Ca_ex	CCA23363.1	844	Na_Ca_ex|Na_Ca_ex	Albugo laibachii Nc14	GH18	NO	NO
comp6076_c0_seq2 len=5699 path=[5365:0-4700 11087:4701-4892 11279:4893-5012 10066:5013-5698]	5699	Glyoxalase_2|Glyoxalase|Glyoxalase_2|Glyoxalase|Na_Ca_ex|Na_Ca_ex	CCA23368.1	829	Na_Ca_ex|Na_Ca_ex	Albugo laibachii Nc14	GH18	NO	NO
comp775_c0_seq1 len=863 path=[841:0-164 1006:165-862]	863	Glyco_hydro_18	AEO70479.1	503	Glyco_hydro_18	Thielavia terrestris NRRL 8126	GH18	YES	NO
comp8016_c0_seq1 len=3999 path=[1:0-815 817:816-930 932:931-3200 3203:3201-3998]	3999	Glyco_hydro_18	ADF57309.1	437	Glyco_hydro_18	Trichoderma ghanense CBS 259.85	GH18	YES	NO		D6N0X4
comp9556_c0_seq1 len=8016 path=[1:0-819 17003:820-820 17004:821-821 823:822-4799 4801:4800-8015]	8016	DUF3608|DEP	EAA59449.1	980	Glyco_hydro_18|adh_short	Aspergillus nidulans FGSC A4	GH18	NO	NO		Q5B652
comp8119_c0_seq2 len=2957 path=[2935:0-1683 4619:1684-2013 4949:2014-2956]	2957	adh_short_C2|adh_short	EAA59449.1	980	Glyco_hydro_18|adh_short	Aspergillus nidulans FGSC A4	GH18	NO	NO		Q5B652
comp9352_c0_seq4 len=2941 path=[2919:0-783 3703:784-2940]	2941	Pkinase|Pkinase_Tyr	CBX99002.1	785	Pkinase	Leptosphaeria maculans v23.1.3	GH18	NO	NO		E5A5V7
comp539905_c0_seq1 len=211 path=[189:0-210]	211	n/a	CBA62479.1	722	AhpC-TSA|Glyco_hydro_18	Clostridium difficile CD196	GH18	n/a	NO		C9XQW9
comp539905_c0_seq1 len=211 path=[189:0-210]	211	n/a	CBE03719.1	722	AhpC-TSA|Glyco_hydro_18	Clostridium difficile R20291	GH18	n/a	NO		C9YL30
comp539905_c0_seq1 len=211 path=[189:0-210]	211	n/a	CAJ68298.1	725	AhpC-TSA|Glyco_hydro_18	Clostridium difficile 630	GH18	n/a	NO		Q18BV5
comp6288_c0_seq1 len=4113 path=[4091:0-1815 5907:1816-1913 6005:1914-4112]	4113	Pkinase_Tyr	CBX99002.1	785	Pkinase	Leptosphaeria maculans v23.1.3	GH18	NO	NO		E5A5V7
comp11561_c0_seq1 len=5769 path=[1:0-5768]	5769	n/a	CCE43988.1	NA	n/a	Candida parapsilosis CDC317	GH18	n/a	n/a
comp3528_c0_seq1 len=2810 path=[1:0-1407 1409:1408-2809]	2810	AhpC-TSA|Redoxin	CBA62479.1	722	AhpC-TSA|Glyco_hydro_18	Clostridium difficile CD196	GH18	NO	NO		C9XQW9
comp3528_c0_seq1 len=2810 path=[1:0-1407 1409:1408-2809]	2810	AhpC-TSA|Redoxin	CBE03719.1	722	AhpC-TSA|Glyco_hydro_18	Clostridium difficile R20291	GH18	NO	NO		C9YL30
comp3528_c0_seq1 len=2810 path=[1:0-1407 1409:1408-2809]	2810	AhpC-TSA|Redoxin	CAJ68298.1	725	AhpC-TSA|Glyco_hydro_18	Clostridium difficile 630	GH18	NO	NO		Q18BV5
comp7939_c0_seq2 len=3367 path=[1:0-266 268:267-774 776:775-3366]	3367	adh_short	EAA59449.1	980	Glyco_hydro_18|adh_short	Aspergillus nidulans FGSC A4	GH18	NO	NO		Q5B652
comp9357_c0_seq8 len=3618 path=[4213:0-783 5051:784-1508 8531:1509-1572 5776:1573-2746 6950:2747-3308 7512:3309-3594 8908:3595-3617]	3618	n/a	BAJ75231.1	NA	n/a	Microbacterium testaceum StLB037	GH18	n/a	n/a
comp9583_c0_seq2 len=2337 path=[1:0-1179 1255:1180-1359 1506:1360-1431 1578:1432-1460 6548:1461-2336]	2337	DnaJ	CCD48345.1	NA	n/a	Botryotinia fuckeliana	GH18	n/a	n/a
comp10110_c0_seq1 len=2594 path=[1:0-2593]	2594	Glyco_hydro_18	CCU56514.1	478	Glyco_hydro_18	Nodulisporium sp. D.N-2013	GH18	YES	NO
comp9357_c0_seq9 len=3554 path=[4213:0-783 5051:784-1508 5776:1509-2682 6950:2683-3244 7512:3245-3530 8908:3531-3553]	3554	n/a	BAJ75231.1	NA	n/a	Microbacterium testaceum StLB037	GH18	n/a	n/a
comp9653_c1_seq7 len=2730 path=[2708:0-1291 4000:1292-2403 5112:2404-2525 5234:2526-2729]	2730	Na_Ca_ex	CCA23373.1	844	Na_Ca_ex|Na_Ca_ex	Albugo laibachii Nc14	GH18	NO	NO
comp9653_c1_seq7 len=2730 path=[2708:0-1291 4000:1292-2403 5112:2404-2525 5234:2526-2729]	2730	Na_Ca_ex	CCA23362.1	829	Na_Ca_ex|Na_Ca_ex	Albugo laibachii Nc14	GH18	NO	NO
comp9653_c1_seq7 len=2730 path=[2708:0-1291 4000:1292-2403 5112:2404-2525 5234:2526-2729]	2730	Na_Ca_ex	CCA23375.1	826	Na_Ca_ex|Na_Ca_ex	Albugo laibachii Nc14	GH18	NO	NO
comp9653_c1_seq7 len=2730 path=[2708:0-1291 4000:1292-2403 5112:2404-2525 5234:2526-2729]	2730	Na_Ca_ex	CCA23372.1	826	Na_Ca_ex|Na_Ca_ex	Albugo laibachii Nc14	GH18	NO	NO
comp9653_c1_seq7 len=2730 path=[2708:0-1291 4000:1292-2403 5112:2404-2525 5234:2526-2729]	2730	Na_Ca_ex	CCA23366.1	840	Na_Ca_ex|Na_Ca_ex	Albugo laibachii Nc14	GH18	NO	NO
comp9653_c1_seq7 len=2730 path=[2708:0-1291 4000:1292-2403 5112:2404-2525 5234:2526-2729]	2730	Na_Ca_ex	CCA23370.1	819	Na_Ca_ex|Na_Ca_ex	Albugo laibachii Nc14	GH18	NO	NO
comp9653_c1_seq7 len=2730 path=[2708:0-1291 4000:1292-2403 5112:2404-2525 5234:2526-2729]	2730	Na_Ca_ex	CCA23374.1	834	Na_Ca_ex|Na_Ca_ex	Albugo laibachii Nc14	GH18	NO	NO
comp9653_c1_seq7 len=2730 path=[2708:0-1291 4000:1292-2403 5112:2404-2525 5234:2526-2729]	2730	Na_Ca_ex	CCA23368.1	829	Na_Ca_ex|Na_Ca_ex	Albugo laibachii Nc14	GH18	NO	NO
comp9653_c1_seq7 len=2730 path=[2708:0-1291 4000:1292-2403 5112:2404-2525 5234:2526-2729]	2730	Na_Ca_ex	CCA23367.1	825	Na_Ca_ex|Na_Ca_ex	Albugo laibachii Nc14	GH18	NO	NO
comp9653_c1_seq7 len=2730 path=[2708:0-1291 4000:1292-2403 5112:2404-2525 5234:2526-2729]	2730	Na_Ca_ex	CCA23369.1	825	Na_Ca_ex|Na_Ca_ex	Albugo laibachii Nc14	GH18	NO	NO
comp9653_c1_seq7 len=2730 path=[2708:0-1291 4000:1292-2403 5112:2404-2525 5234:2526-2729]	2730	Na_Ca_ex	CCA23365.1	822	Na_Ca_ex|Na_Ca_ex	Albugo laibachii Nc14	GH18	NO	NO
comp9653_c1_seq7 len=2730 path=[2708:0-1291 4000:1292-2403 5112:2404-2525 5234:2526-2729]	2730	Na_Ca_ex	CCA23371.1	841	Na_Ca_ex|Na_Ca_ex	Albugo laibachii Nc14	GH18	NO	NO
comp9653_c1_seq7 len=2730 path=[2708:0-1291 4000:1292-2403 5112:2404-2525 5234:2526-2729]	2730	Na_Ca_ex	CCA23363.1	844	Na_Ca_ex|Na_Ca_ex	Albugo laibachii Nc14	GH18	NO	NO
comp9653_c1_seq7 len=2730 path=[2708:0-1291 4000:1292-2403 5112:2404-2525 5234:2526-2729]	2730	Na_Ca_ex	CCA23364.1	841	Na_Ca_ex|Na_Ca_ex	Albugo laibachii Nc14	GH18	NO	NO
comp9045_c0_seq9 len=7371 path=[13899:0-782 7276:783-784 7278:785-991 7485:992-2407 8901:2408-3028 9522:3029-7370]	7371	Pkinase|Pkinase_Tyr	CBX99002.1	785	Pkinase	Leptosphaeria maculans v23.1.3	GH18	NO	NO		E5A5V7
comp4845_c0_seq2 len=3156 path=[7579:0-387 851:388-3155]	3156	Aldo_ket_red|LRR_4	AEY67763.1	600	Glyco_hydro_18	Clostridium sp. BNL1100	GH18	NO	NO
comp9556_c0_seq5 len=8324 path=[1:0-819 16977:820-821 16562:822-950 16009:951-1040 17000:1041-1043 17003:1044-1044 17004:1045-1045 16104:1046-1129 823:1130-5107 4801:5108-8323]	8324	DUF3608|DEP	EAA59449.1	980	Glyco_hydro_18|adh_short	Aspergillus nidulans FGSC A4	GH18	NO	NO		Q5B652
comp2951_c0_seq1 len=1616 path=[1:0-1615]	1616	Pkinase	CBX99002.1	785	Pkinase	Leptosphaeria maculans v23.1.3	GH18	YES	NO		E5A5V7
comp8594_c0_seq4 len=2815 path=[5062:0-173 5237:174-579 5643:580-633 5697:634-679 6238:680-681 2271:682-913 2503:914-1007 2597:1008-2588 4178:2589-2814]	2815	Glyco_hydro_18	CAP59901.1	394	Glyco_hydro_18	Podospora anserina S mat+	GH18	YES	NO		B2A9Z0
comp8797_c0_seq3 len=4410 path=[8554:0-420 8975:421-808 4167:809-856 4215:857-1562 4921:1563-4409]	4410	PhoD	EAA58983.1	938	PhoD	Aspergillus nidulans FGSC A4	GH18	YES	NO		Q5ATY5
comp9398_c1_seq2 len=1890 path=[8678:0-1580 10319:1581-1889]	1890	n/a	BAJ75231.1	NA	n/a	Microbacterium testaceum StLB037	GH18	n/a	n/a
comp13295_c0_seq1 len=2109 path=[2087:0-2108]	2109	Pkinase|Pkinase_Tyr	CBX99002.1	785	Pkinase	Leptosphaeria maculans v23.1.3	GH18	NO	NO		E5A5V7
comp75199_c0_seq1 len=1277 path=[1:0-1276]	1277	PhoD	EAA58983.1	938	PhoD	Aspergillus nidulans FGSC A4	GH18	YES	NO		Q5ATY5
comp9045_c0_seq10 len=7437 path=[13899:0-782 7276:783-784 7278:785-991 7485:992-2407 15527:2408-2473 8901:2474-3094 9522:3095-7436]	7437	Pkinase|Pkinase_Tyr	CBX99002.1	785	Pkinase	Leptosphaeria maculans v23.1.3	GH18	NO	NO		E5A5V7
comp8895_c0_seq1 len=5692 path=[5671:0-81 5753:82-1296 6969:1297-5691]	5692	n/a	ACL77187.1	600	Glyco_hydro_18	Clostridium cellulolyticum H10 ATCC 35319	GH18	n/a	NO		B8I887
comp4684_c0_seq2 len=1918 path=[1:0-1558 3629:1559-1649 1560:1650-1917]	1918	AhpC-TSA	CBA62479.1	722	AhpC-TSA|Glyco_hydro_18	Clostridium difficile CD196	GH18	NO	NO		C9XQW9
comp4684_c0_seq2 len=1918 path=[1:0-1558 3629:1559-1649 1560:1650-1917]	1918	AhpC-TSA	CBE03719.1	722	AhpC-TSA|Glyco_hydro_18	Clostridium difficile R20291	GH18	NO	NO		C9YL30
comp4684_c0_seq2 len=1918 path=[1:0-1558 3629:1559-1649 1560:1650-1917]	1918	AhpC-TSA	CAJ68298.1	725	AhpC-TSA|Glyco_hydro_18	Clostridium difficile 630	GH18	NO	NO		Q18BV5
comp9045_c0_seq4 len=7455 path=[13899:0-782 16514:783-802 7278:803-1009 7485:1010-2425 15527:2426-2491 8901:2492-3112 9522:3113-7454]	7455	Pkinase|Pkinase_Tyr	CBX99002.1	785	Pkinase	Leptosphaeria maculans v23.1.3	GH18	NO	NO		E5A5V7
comp6076_c0_seq1 len=5387 path=[5365:0-4700 10066:4701-5386]	5387	Glyoxalase_2|Glyoxalase|Glyoxalase_2|Glyoxalase|Na_Ca_ex|Na_Ca_ex	CCA23373.1	844	Na_Ca_ex|Na_Ca_ex	Albugo laibachii Nc14	GH18	NO	NO
comp6076_c0_seq1 len=5387 path=[5365:0-4700 10066:4701-5386]	5387	Glyoxalase_2|Glyoxalase|Glyoxalase_2|Glyoxalase|Na_Ca_ex|Na_Ca_ex	CCA23362.1	829	Na_Ca_ex|Na_Ca_ex	Albugo laibachii Nc14	GH18	NO	NO
comp6076_c0_seq1 len=5387 path=[5365:0-4700 10066:4701-5386]	5387	Glyoxalase_2|Glyoxalase|Glyoxalase_2|Glyoxalase|Na_Ca_ex|Na_Ca_ex	CCA23365.1	822	Na_Ca_ex|Na_Ca_ex	Albugo laibachii Nc14	GH18	NO	NO
comp6076_c0_seq1 len=5387 path=[5365:0-4700 10066:4701-5386]	5387	Glyoxalase_2|Glyoxalase|Glyoxalase_2|Glyoxalase|Na_Ca_ex|Na_Ca_ex	CCA23363.1	844	Na_Ca_ex|Na_Ca_ex	Albugo laibachii Nc14	GH18	NO	NO
comp6076_c0_seq1 len=5387 path=[5365:0-4700 10066:4701-5386]	5387	Glyoxalase_2|Glyoxalase|Glyoxalase_2|Glyoxalase|Na_Ca_ex|Na_Ca_ex	CCA23368.1	829	Na_Ca_ex|Na_Ca_ex	Albugo laibachii Nc14	GH18	NO	NO
comp9357_c0_seq3 len=3322 path=[4213:0-783 4997:784-837 5051:838-1562 5776:1563-2736 6950:2737-3298 8887:3299-3321]	3322	n/a	BAJ75231.1	NA	n/a	Microbacterium testaceum StLB037	GH18	n/a	n/a
comp9355_c0_seq6 len=1533 path=[1534:0-195 1730:196-1004 2539:1005-1370 2905:1371-1406 3152:1407-1434 2969:1435-1505 3121:1506-1513 9101:1514-1530 3065:1531-1532]	1533	n/a	CCD56518.1	NA	n/a	Botryotinia fuckeliana	GH18	n/a	n/a
comp9583_c0_seq6 len=2482 path=[1:0-1179 1181:1180-1253 1255:1254-1433 10389:1434-1442 1444:1443-1504 1506:1505-1576 1578:1577-1605 6548:1606-2481]	2482	DnaJ	CCD48345.1	NA	n/a	Botryotinia fuckeliana	GH18	n/a	n/a
comp9045_c0_seq1 len=6943 path=[6921:0-92 7014:93-354 7276:355-356 7278:357-563 7485:564-1979 8901:1980-2600 9522:2601-6942]	6943	Pkinase|Pkinase_Tyr	CBX99002.1	785	Pkinase	Leptosphaeria maculans v23.1.3	GH18	NO	NO		E5A5V7
comp3747_c0_seq1 len=3666 path=[1:0-3665]	3666	Na_Ca_ex	CCA23373.1	844	Na_Ca_ex|Na_Ca_ex	Albugo laibachii Nc14	GH18	NO	NO
comp3747_c0_seq1 len=3666 path=[1:0-3665]	3666	Na_Ca_ex	CCA23362.1	829	Na_Ca_ex|Na_Ca_ex	Albugo laibachii Nc14	GH18	NO	NO
comp3747_c0_seq1 len=3666 path=[1:0-3665]	3666	Na_Ca_ex	CCA23365.1	822	Na_Ca_ex|Na_Ca_ex	Albugo laibachii Nc14	GH18	NO	NO
comp3747_c0_seq1 len=3666 path=[1:0-3665]	3666	Na_Ca_ex	CCA23363.1	844	Na_Ca_ex|Na_Ca_ex	Albugo laibachii Nc14	GH18	NO	NO
comp3747_c0_seq1 len=3666 path=[1:0-3665]	3666	Na_Ca_ex	CCA23368.1	829	Na_Ca_ex|Na_Ca_ex	Albugo laibachii Nc14	GH18	NO	NO
comp5635_c0_seq3 len=2956 path=[2934:0-1909 4844:1910-1995 4930:1996-2692 5627:2693-2955]	2956	Pkinase_Tyr|Pkinase	CBX99002.1	785	Pkinase	Leptosphaeria maculans v23.1.3	GH18	NO	NO		E5A5V7
comp9556_c0_seq3 len=8240 path=[1:0-819 16977:820-821 16562:822-950 16009:951-1040 17000:1041-1043 17003:1044-1044 17004:1045-1045 823:1046-5023 4801:5024-8239]	8240	DUF3608|DEP	EAA59449.1	980	Glyco_hydro_18|adh_short	Aspergillus nidulans FGSC A4	GH18	NO	NO		Q5B652
comp2992_c0_seq1 len=1713 path=[1691:0-229 1921:230-1712]	1713	Pkinase	CBX99002.1	785	Pkinase	Leptosphaeria maculans v23.1.3	GH18	YES	NO		E5A5V7
comp9357_c0_seq5 len=4245 path=[4213:0-783 5051:784-1508 8531:1509-1572 5776:1573-2746 6950:2747-3308 7512:3309-3594 7798:3595-4244]	4245	n/a	BAJ75231.1	NA	n/a	Microbacterium testaceum StLB037	GH18	n/a	n/a
comp6101_c0_seq1 len=7165 path=[1:0-3549 3551:3550-7164]	7165	Pkinase_Tyr|Pkinase	CBX99002.1	785	Pkinase	Leptosphaeria maculans v23.1.3	GH18	NO	NO		E5A5V7
comp12624_c0_seq1 len=1274 path=[1:0-1273]	1274	adh_short	EAA59449.1	980	Glyco_hydro_18|adh_short	Aspergillus nidulans FGSC A4	GH18	NO	NO		Q5B652
comp10982_c0_seq1 len=2638 path=[1:0-2637]	2638	Pkinase|Pkinase_Tyr	CBX99002.1	785	Pkinase	Leptosphaeria maculans v23.1.3	GH18	NO	NO		E5A5V7
comp5164_c0_seq1 len=5875 path=[744:0-12 769:13-5874]	5875	Pkinase|Pkinase_Tyr|Scm3	CBX99002.1	785	Pkinase	Leptosphaeria maculans v23.1.3	GH18	NO	NO		E5A5V7
comp2371_c0_seq1 len=4280 path=[1:0-425 427:426-4279]	4280	Na_Ca_ex|Na_Ca_ex|DUF307	CCA23373.1	844	Na_Ca_ex|Na_Ca_ex	Albugo laibachii Nc14	GH18	NO	NO
comp2371_c0_seq1 len=4280 path=[1:0-425 427:426-4279]	4280	Na_Ca_ex|Na_Ca_ex|DUF307	CCA23362.1	829	Na_Ca_ex|Na_Ca_ex	Albugo laibachii Nc14	GH18	NO	NO
comp2371_c0_seq1 len=4280 path=[1:0-425 427:426-4279]	4280	Na_Ca_ex|Na_Ca_ex|DUF307	CCA23365.1	822	Na_Ca_ex|Na_Ca_ex	Albugo laibachii Nc14	GH18	NO	NO
comp2371_c0_seq1 len=4280 path=[1:0-425 427:426-4279]	4280	Na_Ca_ex|Na_Ca_ex|DUF307	CCA23363.1	844	Na_Ca_ex|Na_Ca_ex	Albugo laibachii Nc14	GH18	NO	NO
comp2371_c0_seq1 len=4280 path=[1:0-425 427:426-4279]	4280	Na_Ca_ex|Na_Ca_ex|DUF307	CCA23368.1	829	Na_Ca_ex|Na_Ca_ex	Albugo laibachii Nc14	GH18	NO	NO
comp7728_c0_seq1 len=1557 path=[1916:0-1226 383:1227-1252 409:1253-1516 673:1517-1556]	1557	n/a	ADU28763.1	643	Glyco_hydro_18	Bacillus cellulosilyticus DSM 2522	GH18	n/a	NO
comp10204_c0_seq1 len=1716 path=[1694:0-1715]	1716	adh_short	EAA59449.1	980	Glyco_hydro_18|adh_short	Aspergillus nidulans FGSC A4	GH18	NO	NO		Q5B652
comp9357_c0_seq10 len=4299 path=[4213:0-783 4997:784-837 5051:838-1562 8531:1563-1626 5776:1627-2800 6950:2801-3362 7512:3363-3648 7798:3649-4298]	4299	n/a	BAJ75231.1	NA	n/a	Microbacterium testaceum StLB037	GH18	n/a	n/a
comp5635_c0_seq4 len=3027 path=[2934:0-1909 4844:1910-1995 4930:1996-2692 5888:2693-2763 5627:2764-3026]	3027	Pkinase_Tyr|Pkinase	CBX99002.1	785	Pkinase	Leptosphaeria maculans v23.1.3	GH18	NO	NO		E5A5V7
comp7787_c0_seq2 len=3573 path=[1:0-267 269:268-2348 2350:2349-3417 3419:3418-3566 3568:3567-3572]	3573	Na_Ca_ex	CCA23373.1	844	Na_Ca_ex|Na_Ca_ex	Albugo laibachii Nc14	GH18	NO	NO
comp7787_c0_seq2 len=3573 path=[1:0-267 269:268-2348 2350:2349-3417 3419:3418-3566 3568:3567-3572]	3573	Na_Ca_ex	CCA23362.1	829	Na_Ca_ex|Na_Ca_ex	Albugo laibachii Nc14	GH18	NO	NO
comp7787_c0_seq2 len=3573 path=[1:0-267 269:268-2348 2350:2349-3417 3419:3418-3566 3568:3567-3572]	3573	Na_Ca_ex	CCA23365.1	822	Na_Ca_ex|Na_Ca_ex	Albugo laibachii Nc14	GH18	NO	NO
comp7787_c0_seq2 len=3573 path=[1:0-267 269:268-2348 2350:2349-3417 3419:3418-3566 3568:3567-3572]	3573	Na_Ca_ex	CCA23363.1	844	Na_Ca_ex|Na_Ca_ex	Albugo laibachii Nc14	GH18	NO	NO
comp7787_c0_seq2 len=3573 path=[1:0-267 269:268-2348 2350:2349-3417 3419:3418-3566 3568:3567-3572]	3573	Na_Ca_ex	CCA23368.1	829	Na_Ca_ex|Na_Ca_ex	Albugo laibachii Nc14	GH18	NO	NO
comp8797_c0_seq2 len=4113 path=[12763:0-123 8975:124-511 4167:512-559 4215:560-1265 4921:1266-4112]	4113	PhoD	EAA58983.1	938	PhoD	Aspergillus nidulans FGSC A4	GH18	YES	NO		Q5ATY5
comp5635_c0_seq2 len=2941 path=[2934:0-1909 4930:1910-2606 5888:2607-2677 5627:2678-2940]	2941	Pkinase_Tyr|Pkinase	CBX99002.1	785	Pkinase	Leptosphaeria maculans v23.1.3	GH18	NO	NO		E5A5V7
comp9357_c0_seq6 len=4181 path=[4213:0-783 5051:784-1508 5776:1509-2682 6950:2683-3244 7512:3245-3530 7798:3531-4180]	4181	n/a	BAJ75231.1	NA	n/a	Microbacterium testaceum StLB037	GH18	n/a	n/a
comp9583_c0_seq4 len=2408 path=[1:0-1179 1255:1180-1359 10389:1360-1368 1444:1369-1430 1506:1431-1502 1578:1503-1531 6548:1532-2407]	2408	DnaJ	CCD48345.1	NA	n/a	Botryotinia fuckeliana	GH18	n/a	n/a
comp9045_c0_seq6 len=7389 path=[13899:0-782 16514:783-802 7278:803-1009 7485:1010-2425 8901:2426-3046 9522:3047-7388]	7389	Pkinase|Pkinase_Tyr	CBX99002.1	785	Pkinase	Leptosphaeria maculans v23.1.3	GH18	NO	NO		E5A5V7
comp2992_c0_seq2 len=1824 path=[1691:0-229 3536:230-340 1921:341-1823]	1824	Pkinase	CBX99002.1	785	Pkinase	Leptosphaeria maculans v23.1.3	GH18	YES	NO		E5A5V7
comp3247_c0_seq1 len=3860 path=[3838:0-3859]	3860	Glyco_hydro_18	AEO67798.1	412	Glyco_hydro_18	Thielavia terrestris NRRL 8126	GH18	YES	NO
comp9357_c0_seq2 len=3386 path=[4213:0-783 4997:784-837 5051:838-1562 8531:1563-1626 5776:1627-2800 6950:2801-3362 8887:3363-3385]	3386	n/a	BAJ75231.1	NA	n/a	Microbacterium testaceum StLB037	GH18	n/a	n/a
comp9398_c1_seq1 len=1950 path=[8678:0-1580 10259:1581-1640 10319:1641-1949]	1950	n/a	BAJ75231.1	NA	n/a	Microbacterium testaceum StLB037	GH18	n/a	n/a
comp9749_c0_seq2 len=2856 path=[4969:0-2407 2802:2408-2432 2827:2433-2539 2934:2540-2613 10068:2614-2696 3089:2697-2722 3115:2723-2797 3190:2798-2855]	2856	n/a	EAA59449.1	980	Glyco_hydro_18|adh_short	Aspergillus nidulans FGSC A4	GH18	n/a	NO		Q5B652
comp9045_c0_seq12 len=7653 path=[13899:0-782 16514:783-802 7014:803-1064 7276:1065-1066 7278:1067-1273 7485:1274-2689 8901:2690-3310 9522:3311-7652]	7653	Pkinase|Pkinase_Tyr	CBX99002.1	785	Pkinase	Leptosphaeria maculans v23.1.3	GH18	NO	NO		E5A5V7
comp5287_c0_seq1 len=5821 path=[5799:0-5375 11175:5376-5820]	5821	Septin|Pkinase_Tyr	CBX99002.1	785	Pkinase	Leptosphaeria maculans v23.1.3	GH18	NO	NO		E5A5V7
comp6190_c0_seq1 len=6225 path=[6203:0-6224]	6225	Pkinase_Tyr|Pkinase	CBX99002.1	785	Pkinase	Leptosphaeria maculans v23.1.3	GH18	NO	NO		E5A5V7
comp11288_c0_seq1 len=7098 path=[1:0-7097]	7098	Pkinase_Tyr|Pkinase|Response_reg	CBX99002.1	785	Pkinase	Leptosphaeria maculans v23.1.3	GH18	NO	NO		E5A5V7
comp136751_c0_seq1 len=363 path=[1:0-362]	363	Glyco_hydro_18	AEO67301.1	440	Glyco_hydro_18	Thielavia terrestris NRRL 8126	GH18	YES	YES
comp9357_c0_seq11 len=3672 path=[4213:0-783 4997:784-837 5051:838-1562 8531:1563-1626 5776:1627-2800 6950:2801-3362 7512:3363-3648 8908:3649-3671]	3672	n/a	BAJ75231.1	NA	n/a	Microbacterium testaceum StLB037	GH18	n/a	n/a
comp8594_c0_seq6 len=2721 path=[5062:0-173 5237:174-579 5643:580-633 5697:634-679 6238:680-681 2271:682-913 2597:914-2494 4178:2495-2720]	2721	Glyco_hydro_18	CAP59901.1	394	Glyco_hydro_18	Podospora anserina S mat+	GH18	YES	NO		B2A9Z0
comp5312_c0_seq1 len=668 path=[1:0-667]	668	adh_short	EAA59449.1	980	Glyco_hydro_18|adh_short	Aspergillus nidulans FGSC A4	GH18	NO	NO		Q5B652
comp8594_c0_seq5 len=2119 path=[2191:0-77 6238:78-79 2271:80-311 2597:312-1892 4178:1893-2118]	2119	Glyco_hydro_18	CAP59901.1	394	Glyco_hydro_18	Podospora anserina S mat+	GH18	YES	NO		B2A9Z0
comp5048_c0_seq2 len=6306 path=[1:0-6053 6055:6054-6305]	6306	Pkinase_Tyr	CBX99002.1	785	Pkinase	Leptosphaeria maculans v23.1.3	GH18	NO	NO		E5A5V7
comp12532_c0_seq1 len=2957 path=[2935:0-2956]	2957	Pkinase|Pkinase_Tyr	CBX99002.1	785	Pkinase	Leptosphaeria maculans v23.1.3	GH18	NO	NO		E5A5V7
comp7787_c0_seq1 len=2504 path=[1:0-267 269:268-2348 3419:2349-2497 3568:2498-2503]	2504	Na_Ca_ex	CCA23373.1	844	Na_Ca_ex|Na_Ca_ex	Albugo laibachii Nc14	GH18	NO	NO
comp7787_c0_seq1 len=2504 path=[1:0-267 269:268-2348 3419:2349-2497 3568:2498-2503]	2504	Na_Ca_ex	CCA23362.1	829	Na_Ca_ex|Na_Ca_ex	Albugo laibachii Nc14	GH18	NO	NO
comp7787_c0_seq1 len=2504 path=[1:0-267 269:268-2348 3419:2349-2497 3568:2498-2503]	2504	Na_Ca_ex	CCA23365.1	822	Na_Ca_ex|Na_Ca_ex	Albugo laibachii Nc14	GH18	NO	NO
comp7787_c0_seq1 len=2504 path=[1:0-267 269:268-2348 3419:2349-2497 3568:2498-2503]	2504	Na_Ca_ex	CCA23363.1	844	Na_Ca_ex|Na_Ca_ex	Albugo laibachii Nc14	GH18	NO	NO
comp7787_c0_seq1 len=2504 path=[1:0-267 269:268-2348 3419:2349-2497 3568:2498-2503]	2504	Na_Ca_ex	CCA23368.1	829	Na_Ca_ex|Na_Ca_ex	Albugo laibachii Nc14	GH18	NO	NO
comp10191_c0_seq1 len=3820 path=[1:0-3819]	3820	Pkinase_Tyr|Pkinase	CBX99002.1	785	Pkinase	Leptosphaeria maculans v23.1.3	GH18	NO	NO		E5A5V7
comp7499_c0_seq1 len=4318 path=[135:0-463 599:464-3668 3804:3669-4317]	4318	Pkinase_Tyr	CBX99002.1	785	Pkinase	Leptosphaeria maculans v23.1.3	GH18	NO	NO		E5A5V7
comp4050_c0_seq1 len=4278 path=[4256:0-4277]	4278	Glyco_hydro_18	ACR36531.1	430	Glyco_hydro_18	Zea mays B73	GH18	YES	NO		C4J5T1
comp8585_c0_seq2 len=2084 path=[1:0-670 672:671-701 703:702-1475 4002:1476-1640 1477:1641-2083]	2084	Glyco_hydro_18|CBM_1	AEO66455.1	404	Glyco_hydro_18	Thielavia terrestris NRRL 8126	GH18|CBM1	NO	NO
comp163180_c0_seq1 len=260 path=[238:0-259]	260	n/a	AEO66455.1	404	Glyco_hydro_18	Thielavia terrestris NRRL 8126	GH18|CBM1	n/a	NO
comp8585_c0_seq1 len=1888 path=[1:0-670 703:671-1444 1477:1445-1887]	1888	Glyco_hydro_18|CBM_1	AEO66455.1	404	Glyco_hydro_18	Thielavia terrestris NRRL 8126	GH18|CBM1	NO	NO
comp8585_c0_seq3 len=1919 path=[1:0-670 672:671-701 703:702-1475 1477:1476-1918]	1919	Glyco_hydro_18|CBM_1	AEO66455.1	404	Glyco_hydro_18	Thielavia terrestris NRRL 8126	GH18|CBM1	NO	NO
comp8585_c0_seq4 len=2053 path=[1:0-670 703:671-1444 4002:1445-1609 1477:1610-2052]	2053	Glyco_hydro_18|CBM_1	AEO66455.1	404	Glyco_hydro_18	Thielavia terrestris NRRL 8126	GH18|CBM1	NO	NO
comp143578_c0_seq1 len=551 path=[1:0-550]	551	Glyco_hydro_2_C	ACP93342.1	459	Glyco_hydro_2_C	unidentified	GH2	YES	YES
comp60337_c0_seq1 len=684 path=[662:0-683]	684	n/a	AEO64472.1	NA	n/a	Thielavia terrestris NRRL 8126	GH2	n/a	n/a
comp338545_c0_seq1 len=323 path=[301:0-322]	323	n/a	AER06351.1	NA	n/a	Propionibacterium acnes ATCC 11828	GH2	n/a	n/a
comp8338_c0_seq3 len=7055 path=[1:0-2675 2677:2676-3728 3730:3729-6073 14070:6074-6077 14074:6078-6093 6086:6094-7054]	7055	MCM|Glyco_hydro_2_N|Glyco_hydro_2_C	CAK44902.1	661	Glyco_hydro_2_N	Aspergillus niger CBS 513.88	GH2	NO	NO		A2QL36
comp11904_c0_seq1 len=1512 path=[1490:0-1511]	1512	PhyH	CAL54622.1	1705	Glyco_hydro_2_N|Glyco_hydro_2_C|Bgal_small_N|DS|PhyH	Ostreococcus tauri OTTH0595	GH2	NO	YES		Q014Q7
comp35295_c0_seq1 len=512 path=[1:0-511]	512	Bgal_small_N	DAA35009.1	1084	Glyco_hydro_2_N|Glyco_hydro_2_C|Bgal_small_N	Neurospora crassa OR74A	GH2	NO	NO
comp211846_c0_seq1 len=311 path=[289:0-310]	311	Glyco_hydro_2	CCD50749.1	1070	Glyco_hydro_2_N|Glyco_hydro_2|Glyco_hydro_2_C|Bgal_small_N	Botryotinia fuckeliana	GH2	NO	NO
comp8575_c0_seq1 len=5060 path=[1:0-435 519:436-854 1009:855-2963 3118:2964-5059]	5060	Bgal_small_N|Glyco_hydro_2_C|Glyco_hydro_2|Glyco_hydro_2_N	AEO64183.1	1077	Glyco_hydro_2_N|Glyco_hydro_2_C|Bgal_small_N	Thielavia terrestris NRRL 8126	GH2	NO	NO
comp8575_c0_seq2 len=5213 path=[1:0-435 437:436-517 519:518-936 938:937-1007 1009:1008-3116 3118:3117-5212]	5213	Bgal_small_N|Glyco_hydro_2_C|Glyco_hydro_2|Glyco_hydro_2_N	AEO64183.1	1077	Glyco_hydro_2_N|Glyco_hydro_2_C|Bgal_small_N	Thielavia terrestris NRRL 8126	GH2	NO	NO
comp1227_c0_seq1 len=215 path=[1:0-214]	215	n/a	AEO59187.1	NA	n/a	Myceliophthora thermophila ATCC 42464	GH2	n/a	n/a
comp5683_c0_seq2 len=3885 path=[3863:0-2505 6369:2506-3082 6946:3083-3884]	3885	Thaumatin|Ank_2	CBX99479.1	1325	Thaumatin	Leptosphaeria maculans v23.1.3	GH2	NO	NO		E5A784
comp119132_c0_seq1 len=818 path=[796:0-817]	818	n/a	AEO69937.1	NA	n/a	Thielavia terrestris NRRL 8126	GH2	n/a	n/a
comp9654_c0_seq5 len=8280 path=[1:0-636 638:637-706 708:707-3102 3104:3103-3783 3858:3784-7763 7838:7764-7787 19909:7788-8279]	8280	Glyco_hydro_2_N|Glyco_hydro_2|Glyco_hydro_2_C	AEO59435.1	894	Glyco_hydro_2_N|Glyco_hydro_2|Glyco_hydro_2_C	Myceliophthora thermophila ATCC 42464	GH2	YES	NO
comp6009_c1_seq1 len=3753 path=[3731:0-3752]	3753	ADH_zinc_N|ADH_N	AEO69937.1	NA	n/a	Thielavia terrestris NRRL 8126	GH2	n/a	n/a
comp9654_c0_seq3 len=8565 path=[1:0-636 638:637-706 24529:707-991 708:992-3387 3104:3388-4068 3858:4069-8048 7838:8049-8072 19909:8073-8564]	8565	Glyco_hydro_2_N|Glyco_hydro_2|Glyco_hydro_2_C	AEO59435.1	894	Glyco_hydro_2_N|Glyco_hydro_2|Glyco_hydro_2_C	Myceliophthora thermophila ATCC 42464	GH2	YES	NO
comp8528_c0_seq1 len=7023 path=[1:0-1554 1556:1555-5277 5279:5278-6553 6555:6554-7022]	7023	HSF_DNA-bind|DS	CAL54622.1	1705	Glyco_hydro_2_N|Glyco_hydro_2_C|Bgal_small_N|DS|PhyH	Ostreococcus tauri OTTH0595	GH2	NO	NO		Q014Q7
comp5683_c0_seq1 len=3998 path=[3863:0-2505 6369:2506-3082 7831:3083-3195 6946:3196-3997]	3998	Thaumatin	CBX99479.1	1325	Thaumatin	Leptosphaeria maculans v23.1.3	GH2	YES	NO		E5A784
comp58041_c0_seq1 len=1206 path=[1184:0-1205]	1206	Glyco_hydro_2_C|Bgal_small_N	AEO53731.1	1093	Glyco_hydro_2_N|Glyco_hydro_2|Glyco_hydro_2_C|Bgal_small_N	Myceliophthora thermophila ATCC 42464	GH2	NO	YES
comp9654_c0_seq2 len=8638 path=[1:0-636 638:637-706 24529:707-991 708:992-3387 3104:3388-4068 3785:4069-4141 3858:4142-8121 7838:8122-8145 19909:8146-8637]	8638	Glyco_hydro_2_N|Glyco_hydro_2|Glyco_hydro_2_C	AEO59435.1	894	Glyco_hydro_2_N|Glyco_hydro_2|Glyco_hydro_2_C	Myceliophthora thermophila ATCC 42464	GH2	YES	NO
comp8575_c0_seq4 len=5142 path=[1:0-435 437:436-517 519:518-936 1009:937-3045 3118:3046-5141]	5142	Bgal_small_N|Glyco_hydro_2_C|Glyco_hydro_2|Glyco_hydro_2_N	AEO64183.1	1077	Glyco_hydro_2_N|Glyco_hydro_2_C|Bgal_small_N	Thielavia terrestris NRRL 8126	GH2	NO	NO
comp4290_c1_seq1 len=8058 path=[5390:0-481 5872:482-8057]	8058	Glyco_hydro_2_N|Glyco_hydro_2|Glyco_hydro_2_C|Bgal_small_N|IBR	AEO64183.1	1077	Glyco_hydro_2_N|Glyco_hydro_2_C|Bgal_small_N	Thielavia terrestris NRRL 8126	GH2	NO	NO
comp1260_c0_seq1 len=873 path=[851:0-872]	873	Glyco_hydro_2_N	AEO53731.1	1093	Glyco_hydro_2_N|Glyco_hydro_2|Glyco_hydro_2_C|Bgal_small_N	Myceliophthora thermophila ATCC 42464	GH2	NO	NO
comp5304_c0_seq1 len=4202 path=[4180:0-4201]	4202	Glyco_hydro_2_C|Glyco_hydro_2|Glyco_hydro_2_N	BAE58640.1	666	Glyco_hydro_2_N	Aspergillus oryzae RIB40	GH2	NO	NO		Q2UIH5
comp6009_c0_seq1 len=250 path=[7688:0-249]	250	n/a	AEO69937.1	NA	n/a	Thielavia terrestris NRRL 8126	GH2	n/a	n/a
comp8338_c0_seq2 len=7046 path=[1:0-2675 2677:2676-3728 3730:3729-6073 6075:6074-6084 6086:6085-7045]	7046	MCM|Glyco_hydro_2_N|Glyco_hydro_2_C	CAK44902.1	661	Glyco_hydro_2_N	Aspergillus niger CBS 513.88	GH2	NO	NO		A2QL36
comp9654_c0_seq1 len=8353 path=[1:0-636 638:637-706 708:707-3102 3104:3103-3783 3785:3784-3856 3858:3857-7836 7838:7837-7860 19909:7861-8352]	8353	Glyco_hydro_2_N|Glyco_hydro_2|Glyco_hydro_2_C	AEO59435.1	894	Glyco_hydro_2_N|Glyco_hydro_2|Glyco_hydro_2_C	Myceliophthora thermophila ATCC 42464	GH2	YES	NO
comp8575_c0_seq3 len=5131 path=[1:0-435 519:436-854 938:855-925 1009:926-3034 3118:3035-5130]	5131	Bgal_small_N|Glyco_hydro_2_C|Glyco_hydro_2|Glyco_hydro_2_N	AEO64183.1	1077	Glyco_hydro_2_N|Glyco_hydro_2_C|Bgal_small_N	Thielavia terrestris NRRL 8126	GH2	NO	NO
comp197630_c0_seq1 len=238 path=[1:0-237]	238	n/a	XP_364819.1	NA	n/a	Magnaporthe grisea 70-15	GH2	n/a	n/a		Q2KHA3
comp347671_c0_seq1 len=258 path=[1:0-257]	258	n/a	CBX98985.1	NA	n/a	Leptosphaeria maculans v23.1.3	GH2|CBM35|GH27	n/a	n/a		E5A5U0
comp533153_c0_seq1 len=209 path=[187:0-208]	209	n/a	CBX98985.1	NA	n/a	Leptosphaeria maculans v23.1.3	GH2|CBM35|GH27	n/a	n/a		E5A5U0
comp358946_c0_seq1 len=362 path=[1:0-361]	362	n/a	CBX98985.1	NA	n/a	Leptosphaeria maculans v23.1.3	GH2|CBM35|GH27	n/a	n/a		E5A5U0
comp265190_c0_seq1 len=284 path=[1:0-283]	284	n/a	CBX98985.1	NA	n/a	Leptosphaeria maculans v23.1.3	GH2|CBM35|GH27	n/a	n/a		E5A5U0
comp615266_c0_seq1 len=245 path=[1:0-244]	245	n/a	CBX98985.1	NA	n/a	Leptosphaeria maculans v23.1.3	GH2|CBM35|GH27	n/a	n/a		E5A5U0
comp9677_c0_seq4 len=4120 path=[4295:0-77 4440:78-312 4675:313-587 5161:588-734 5308:735-803 5377:804-996 5570:997-1173 5747:1174-2113 8716:2114-2194 6687:2195-3369 7862:3370-4119]	4120	Glyco_hydro_20	AAP01161.1	594	Glycohydro_20b2|Glyco_hydro_20	Fusarium venenatum	GH20	NO	NO
comp9677_c0_seq22 len=2924 path=[4950:0-210 5161:211-357 5377:358-550 5570:551-727 5747:728-1667 8716:1668-1748 6687:1749-2923]	2924	Glyco_hydro_20	AEO53435.1	595	Glycohydro_20b2|Glyco_hydro_20	Myceliophthora thermophila ATCC 42464	GH20	NO	NO
comp9677_c0_seq6 len=4051 path=[4295:0-77 4440:78-312 4675:313-587 5161:588-734 5377:735-927 5570:928-1104 5747:1105-2044 8716:2045-2125 6687:2126-3300 7862:3301-4050]	4051	Glyco_hydro_20	AAP01161.1	594	Glycohydro_20b2|Glyco_hydro_20	Fusarium venenatum	GH20	NO	NO
comp9677_c0_seq1 len=3191 path=[4295:0-77 4373:78-144 4440:145-379 4675:380-654 5161:655-801 5377:802-994 5747:995-1934 8716:1935-2015 6687:2016-3190]	3191	Glyco_hydro_20	AEO53435.1	595	Glycohydro_20b2|Glyco_hydro_20	Myceliophthora thermophila ATCC 42464	GH20	NO	NO
comp9677_c0_seq15 len=3874 path=[4295:0-77 4440:78-312 4675:313-587 5161:588-734 5377:735-927 5747:928-1867 8716:1868-1948 6687:1949-3123 7862:3124-3873]	3874	Glyco_hydro_20	AAP01161.1	594	Glycohydro_20b2|Glyco_hydro_20	Fusarium venenatum	GH20	NO	NO
comp6597_c0_seq3 len=550 path=[3618:0-231 3850:232-334 3953:335-526 7336:527-549]	550	n/a	CAK43562.1	722	Glyco_hydro_20	Aspergillus niger CBS 513.88	GH20	n/a	NO		A2Q7T9
comp9677_c0_seq9 len=3260 path=[4295:0-77 4373:78-144 4440:145-379 4675:380-654 5161:655-801 5308:802-870 5377:871-1063 5747:1064-2003 8716:2004-2084 6687:2085-3259]	3260	Glyco_hydro_20	AEO53435.1	595	Glycohydro_20b2|Glyco_hydro_20	Myceliophthora thermophila ATCC 42464	GH20	NO	NO
comp24065_c0_seq1 len=2584 path=[1:0-2583]	2584	Glyco_hydro_20	CAP99768.1	719	Glyco_hydro_20	Penicillium chrysogenum Wisconsin 54-1255	GH20	YES	NO		B6HR95
comp9677_c0_seq14 len=2747 path=[4950:0-210 5161:211-357 5377:358-550 5747:551-1490 8716:1491-1571 6687:1572-2746]	2747	Glyco_hydro_20	AEO53435.1	595	Glycohydro_20b2|Glyco_hydro_20	Myceliophthora thermophila ATCC 42464	GH20	NO	NO
comp9677_c0_seq12 len=3193 path=[4295:0-77 4440:78-312 4675:313-587 5161:588-734 5308:735-803 5377:804-996 5747:997-1936 8716:1937-2017 6687:2018-3192]	3193	Glyco_hydro_20	AEO53435.1	595	Glycohydro_20b2|Glyco_hydro_20	Myceliophthora thermophila ATCC 42464	GH20	NO	NO
comp9677_c0_seq3 len=3437 path=[4295:0-77 4373:78-144 4440:145-379 4675:380-654 5161:655-801 5308:802-870 5377:871-1063 5570:1064-1240 5747:1241-2180 8716:2181-2261 6687:2262-3436]	3437	Glyco_hydro_20	AEO53435.1	595	Glycohydro_20b2|Glyco_hydro_20	Myceliophthora thermophila ATCC 42464	GH20	NO	NO
comp9677_c0_seq19 len=3929 path=[4295:0-77 4373:78-144 4440:145-379 4675:380-654 5161:655-801 5308:802-870 5377:871-1063 5747:1064-2003 6687:2004-3178 7862:3179-3928]	3929	Glyco_hydro_20	AAP01161.1	594	Glycohydro_20b2|Glyco_hydro_20	Fusarium venenatum	GH20	NO	NO
comp9677_c0_seq8 len=3368 path=[4295:0-77 4373:78-144 4440:145-379 4675:380-654 5161:655-801 5377:802-994 5570:995-1171 5747:1172-2111 8716:2112-2192 6687:2193-3367]	3368	Glyco_hydro_20	AEO53435.1	595	Glycohydro_20b2|Glyco_hydro_20	Myceliophthora thermophila ATCC 42464	GH20	NO	NO
comp6597_c0_seq1 len=447 path=[3618:0-231 3953:232-423 7336:424-446]	447	n/a	CAK43562.1	722	Glyco_hydro_20	Aspergillus niger CBS 513.88	GH20	n/a	NO		A2Q7T9
comp9677_c0_seq11 len=3970 path=[4295:0-77 4440:78-312 4675:313-587 5161:588-734 5377:735-927 5570:928-1104 5747:1105-2044 6687:2045-3219 7862:3220-3969]	3970	Glyco_hydro_20	AAP01161.1	594	Glycohydro_20b2|Glyco_hydro_20	Fusarium venenatum	GH20	NO	NO
comp9677_c0_seq24 len=2843 path=[4950:0-210 5161:211-357 5377:358-550 5570:551-727 5747:728-1667 6687:1668-2842]	2843	Glyco_hydro_20	AEO53435.1	595	Glycohydro_20b2|Glyco_hydro_20	Myceliophthora thermophila ATCC 42464	GH20	NO	NO
comp9677_c0_seq16 len=2666 path=[4950:0-210 5161:211-357 5377:358-550 5747:551-1490 6687:1491-2665]	2666	Glyco_hydro_20	AEO53435.1	595	Glycohydro_20b2|Glyco_hydro_20	Myceliophthora thermophila ATCC 42464	GH20	NO	NO
comp9677_c0_seq18 len=4106 path=[4295:0-77 4373:78-144 4440:145-379 4675:380-654 5161:655-801 5308:802-870 5377:871-1063 5570:1064-1240 5747:1241-2180 6687:2181-3355 7862:3356-4105]	4106	Glyco_hydro_20	AAP01161.1	594	Glycohydro_20b2|Glyco_hydro_20	Fusarium venenatum	GH20	NO	NO
comp9677_c0_seq21 len=4039 path=[4295:0-77 4440:78-312 4675:313-587 5161:588-734 5308:735-803 5377:804-996 5570:997-1173 5747:1174-2113 6687:2114-3288 7862:3289-4038]	4039	Glyco_hydro_20	AAP01161.1	594	Glycohydro_20b2|Glyco_hydro_20	Fusarium venenatum	GH20	NO	NO
comp9677_c0_seq7 len=3793 path=[4295:0-77 4440:78-312 4675:313-587 5161:588-734 5377:735-927 5747:928-1867 6687:1868-3042 7862:3043-3792]	3793	Glyco_hydro_20	AAP01161.1	594	Glycohydro_20b2|Glyco_hydro_20	Fusarium venenatum	GH20	NO	NO
comp9677_c0_seq5 len=824 path=[8911:0-73 7862:74-823]	824	Glyco_hydro_20	AEO70312.1	593	Glycohydro_20b2|Glyco_hydro_20	Thielavia terrestris NRRL 8126	GH20	NO	NO
comp6597_c0_seq2 len=3115 path=[1:0-3052 3054:3053-3114]	3115	But2|Glyco_hydro_20	CAK43562.1	722	Glyco_hydro_20	Aspergillus niger CBS 513.88	GH20	NO	NO		A2Q7T9
comp9677_c0_seq17 len=3862 path=[4295:0-77 4440:78-312 4675:313-587 5161:588-734 5308:735-803 5377:804-996 5747:997-1936 6687:1937-3111 7862:3112-3861]	3862	Glyco_hydro_20	AAP01161.1	594	Glycohydro_20b2|Glyco_hydro_20	Fusarium venenatum	GH20	NO	NO
comp8058_c0_seq1 len=3767 path=[1:0-385 387:386-1372 1374:1373-3766]	3767	MFS_2|MFS_1|MFS_1	ACI51176.1	1153	Glyco_hydro_20	Gluconacetobacter diazotrophicus PAl 5	GH20	NO	NO		A9H8L8
comp9677_c0_seq2 len=2993 path=[4950:0-210 5161:211-357 5308:358-426 5377:427-619 5570:620-796 5747:797-1736 8716:1737-1817 6687:1818-2992]	2993	Glyco_hydro_20	AEO53435.1	595	Glycohydro_20b2|Glyco_hydro_20	Myceliophthora thermophila ATCC 42464	GH20	NO	NO
comp9677_c0_seq10 len=4037 path=[4295:0-77 4373:78-144 4440:145-379 4675:380-654 5161:655-801 5377:802-994 5570:995-1171 5747:1172-2111 6687:2112-3286 7862:3287-4036]	4037	Glyco_hydro_20	AAP01161.1	594	Glycohydro_20b2|Glyco_hydro_20	Fusarium venenatum	GH20	NO	NO
comp9677_c0_seq13 len=2912 path=[4950:0-210 5161:211-357 5308:358-426 5377:427-619 5570:620-796 5747:797-1736 6687:1737-2911]	2912	Glyco_hydro_20	AEO53435.1	595	Glycohydro_20b2|Glyco_hydro_20	Myceliophthora thermophila ATCC 42464	GH20	NO	NO
comp9677_c0_seq23 len=3860 path=[4295:0-77 4373:78-144 4440:145-379 4675:380-654 5161:655-801 5377:802-994 5747:995-1934 6687:1935-3109 7862:3110-3859]	3860	Glyco_hydro_20	AAP01161.1	594	Glycohydro_20b2|Glyco_hydro_20	Fusarium venenatum	GH20	NO	NO
comp8009_c0_seq1 len=5272 path=[5250:0-1389 6640:1390-2737 7988:2738-5271]	5272	HSP70|NAD-GH|NT-C2	ADB73996.1	NA	n/a	Geodermatophilus obscurus DSM 43160	GH23	n/a	n/a		D2SB48
comp9142_c0_seq3 len=1595 path=[2066:0-916 3476:917-1276 3836:1277-1594]	1595	Glyco_hydro_25	AEO57322.1	238	Glyco_hydro_25	Myceliophthora thermophila ATCC 42464	GH25	YES	NO
comp9142_c0_seq4 len=1622 path=[2066:0-916 2983:917-943 3476:944-1303 3836:1304-1621]	1622	Glyco_hydro_25	AEO57322.1	238	Glyco_hydro_25	Myceliophthora thermophila ATCC 42464	GH25	YES	NO
comp9142_c0_seq1 len=2088 path=[2066:0-916 2983:917-943 3010:944-1290 3357:1291-1409 3476:1410-1769 3836:1770-2087]	2088	Glyco_hydro_25	AEO57322.1	238	Glyco_hydro_25	Myceliophthora thermophila ATCC 42464	GH25	YES	NO
comp9142_c0_seq2 len=1741 path=[2066:0-916 2983:917-943 3357:944-1062 3476:1063-1422 3836:1423-1740]	1741	Glyco_hydro_25	AEO57322.1	238	Glyco_hydro_25	Myceliophthora thermophila ATCC 42464	GH25	YES	NO
comp4931_c0_seq1 len=2757 path=[1:0-2756]	2757	n/a	AEM81975.1	NA	n/a	Streptomyces violaceusniger Tu 4113	GH27	n/a	n/a
comp19627_c0_seq1 len=1411 path=[1:0-1410]	1411	MIP	AFN53695.1	439	MIP	Linum usitatissimum	GH27	YES	NO
comp6718_c0_seq2 len=2227 path=[2205:0-834 3040:835-1252 3458:1253-1380 3586:1381-2226]	2227	Melibiase	CAP71790.1	434	Melibiase	Podospora anserina S mat+	GH27	YES	NO		B2B3V4
comp8420_c0_seq2 len=3911 path=[3843:0-1843 5689:1844-2551 7707:2552-2599 6397:2600-3149 6947:3150-3910]	3911	Fungal_trans|Melibiase	BAE93465.1	485	Melibiase|Melibiase	Lachancea thermotolerans NBRC 10066	GH27	NO	NO		Q1MW33
comp3932_c0_seq2 len=2419 path=[2397:0-1487 3885:1488-2418]	2419	MIP	AFN53695.1	439	MIP	Linum usitatissimum	GH27	YES	NO
comp2970_c0_seq2 len=1987 path=[1:0-181 261:182-1986]	1987	MIP	AFN53695.1	439	MIP	Linum usitatissimum	GH27	YES	NO
comp6718_c0_seq1 len=2298 path=[2205:0-834 4431:835-905 3040:906-1323 3458:1324-1451 3586:1452-2297]	2298	Melibiase	CAP71790.1	434	Melibiase	Podospora anserina S mat+	GH27	YES	NO		B2B3V4
comp9145_c0_seq2 len=5944 path=[21916:0-50 21655:51-122 5018:123-3301 19014:3302-5164 20877:5165-5943]	5944	MIP	AFN53695.1	439	MIP	Linum usitatissimum	GH27	YES	NO
comp2970_c0_seq1 len=2065 path=[1:0-181 183:182-259 261:260-2064]	2065	MIP	AFN53695.1	439	MIP	Linum usitatissimum	GH27	YES	NO
comp9145_c0_seq1 len=10909 path=[1:0-5015 21655:5016-5087 5018:5088-8266 19014:8267-10129 20877:10130-10908]	10909	Zip|Zip|Na_H_Exchanger|MIP	AFN53695.1	439	MIP	Linum usitatissimum	GH27	NO	NO
comp9145_c0_seq4 len=10838 path=[1:0-5015 22233:5016-5016 5018:5017-8195 19014:8196-10058 20877:10059-10837]	10838	Zip|Zip|Na_H_Exchanger|MIP	AFN53695.1	439	MIP	Linum usitatissimum	GH27	NO	NO
comp8420_c0_seq1 len=3863 path=[3843:0-1843 5689:1844-2551 6397:2552-3101 6947:3102-3862]	3863	Fungal_trans|Melibiase	BAE93465.1	485	Melibiase|Melibiase	Lachancea thermotolerans NBRC 10066	GH27	NO	NO		Q1MW33
comp7730_c0_seq1 len=4742 path=[4720:0-1572 6293:1573-1659 6380:1660-3029 7750:3030-4741]	4742	Glyco_hydro_28	CCD44029.1	427	Glyco_hydro_28	Botryotinia fuckeliana	GH28	YES	NO
comp9574_c0_seq8 len=4118 path=[1:0-718 720:719-854 856:855-1017 1078:1018-1110 1171:1111-1174 1235:1175-1186 1247:1187-1894 1955:1895-1997 2116:1998-2599 2775:2600-4117]	4118	Fungal_trans|Zn_clus	BAE64464.1	1388	Fungal_trans	Aspergillus oryzae RIB40	GH28	NO	NO		Q2U1V1
comp5224_c0_seq2 len=6104 path=[1:0-1393 1395:1394-1449 1451:1450-6103]	6104	Fungal_trans|Zn_clus	BAE64464.1	1388	Fungal_trans	Aspergillus oryzae RIB40	GH28	NO	NO		Q2U1V1
comp9263_c0_seq4 len=6352 path=[6273:0-2901 9175:2902-3534 13060:3535-3591 9808:3592-4064 10281:4065-4625 10842:4626-6351]	6352	Amidohydro_2|Fungal_trans|Zn_clus	BAE64464.1	1388	Fungal_trans	Aspergillus oryzae RIB40	GH28	NO	NO		Q2U1V1
comp8511_c0_seq2 len=3980 path=[1:0-766 7818:767-842 768:843-3800 3726:3801-3979]	3980	Zn_clus|Fungal_trans	BAE64464.1	1388	Fungal_trans	Aspergillus oryzae RIB40	GH28	NO	NO		Q2U1V1
comp9574_c0_seq20 len=4015 path=[1:0-718 720:719-854 856:855-1017 1078:1018-1110 1171:1111-1174 1235:1175-1186 1247:1187-1894 2116:1895-2496 2775:2497-4014]	4015	Fungal_trans|Zn_clus	BAE64464.1	1388	Fungal_trans	Aspergillus oryzae RIB40	GH28	NO	NO		Q2U1V1
comp6781_c0_seq1 len=2449 path=[2427:0-1759 4187:1760-2448]	2449	Glyco_hydro_28|DUF427	CCD46689.1	469	Glyco_hydro_28	Botryotinia fuckeliana	GH28	NO	NO
comp9574_c0_seq21 len=3982 path=[1:0-718 856:719-881 1078:882-974 1171:975-1038 1235:1039-1050 1247:1051-1758 1955:1759-1861 2116:1862-2463 2775:2464-3981]	3982	Fungal_trans|Zn_clus	BAE64464.1	1388	Fungal_trans	Aspergillus oryzae RIB40	GH28	NO	NO		Q2U1V1
comp9574_c0_seq26 len=4072 path=[1:0-718 720:719-854 856:855-1017 1078:1018-1110 1171:1111-1174 1235:1175-1186 1247:1187-1894 2116:1895-2496 2718:2497-2553 2775:2554-4071]	4072	Fungal_trans|Zn_clus	BAE64464.1	1388	Fungal_trans	Aspergillus oryzae RIB40	GH28	NO	NO		Q2U1V1
comp164998_c0_seq1 len=339 path=[317:0-338]	339	n/a	XP_327247.1	473	Glyco_hydro_28	Neurospora crassa OR74A	GH28	n/a	NO
comp9565_c0_seq1 len=5783 path=[5819:0-4917 10737:4918-4954 16623:4955-4957 15820:4958-5050 2201:5051-5686 2837:5687-5782]	5783	DUF3533|Glyco_hydro_28	AEO70983.1	376	Glyco_hydro_28	Thielavia terrestris NRRL 8126	GH28	NO	NO
comp9574_c0_seq9 len=4097 path=[1:0-718 856:719-881 1078:882-974 1171:975-1038 1235:1039-1050 1247:1051-1758 1955:1759-1861 2058:1862-1919 2116:1920-2521 2718:2522-2578 2775:2579-4096]	4097	Fungal_trans|Zn_clus	BAE64464.1	1388	Fungal_trans	Aspergillus oryzae RIB40	GH28	NO	NO		Q2U1V1
comp4554_c0_seq1 len=6366 path=[1:0-6365]	6366	MFS_1|TRI12|Fungal_trans	BAE64464.1	1388	Fungal_trans	Aspergillus oryzae RIB40	GH28	NO	NO		Q2U1V1
comp5224_c0_seq1 len=6048 path=[1:0-1393 1451:1394-6047]	6048	Fungal_trans|Zn_clus	BAE64464.1	1388	Fungal_trans	Aspergillus oryzae RIB40	GH28	NO	NO		Q2U1V1
comp9565_c0_seq4 len=5012 path=[5819:0-4917 10737:4918-4954 16623:4955-4957 10777:4958-5011]	5012	DUF3533|Glyco_hydro_28	AEO70983.1	376	Glyco_hydro_28	Thielavia terrestris NRRL 8126	GH28	NO	NO
comp8348_c0_seq2 len=4833 path=[5278:0-4809 10707:4810-4832]	4833	Abhydrolase_5|Abhydrolase_6|Fungal_trans|Zn_clus	BAE64464.1	1388	Fungal_trans	Aspergillus oryzae RIB40	GH28	NO	NO		Q2U1V1
comp4023_c0_seq1 len=4809 path=[4735:0-2249 9567:2250-2301 6985:2302-4808]	4809	Fungal_trans|Zn_clus	BAE64464.1	1388	Fungal_trans	Aspergillus oryzae RIB40	GH28	NO	NO		Q2U1V1
comp9574_c0_seq27 len=4177 path=[1:0-718 720:719-854 856:855-1017 1019:1018-1076 1078:1077-1169 1171:1170-1233 1235:1234-1245 1247:1246-1953 1955:1954-2056 2116:2057-2658 2775:2659-4176]	4177	Fungal_trans|Zn_clus	BAE64464.1	1388	Fungal_trans	Aspergillus oryzae RIB40	GH28	NO	NO		Q2U1V1
comp9574_c0_seq18 len=4055 path=[1:0-718 720:719-854 856:855-1017 1019:1018-1076 1078:1077-1169 1247:1170-1877 2116:1878-2479 2718:2480-2536 2775:2537-4054]	4055	Fungal_trans|Zn_clus	BAE64464.1	1388	Fungal_trans	Aspergillus oryzae RIB40	GH28	NO	NO		Q2U1V1
comp9574_c0_seq6 len=4176 path=[1:0-718 720:719-854 856:855-1017 1078:1018-1110 1171:1111-1174 1235:1175-1186 1247:1187-1894 1955:1895-1997 2058:1998-2055 2116:2056-2657 2775:2658-4175]	4176	Fungal_trans|Zn_clus	BAE64464.1	1388	Fungal_trans	Aspergillus oryzae RIB40	GH28	NO	NO		Q2U1V1
comp180674_c0_seq1 len=540 path=[1:0-539]	540	n/a	BAE97087.1	477	Glyco_hydro_28	Fusarium oxysporum f. sp. phaseoli	GH28	n/a	YES		Q14TT2
comp180674_c0_seq1 len=540 path=[1:0-539]	540	n/a	BAE97085.1	477	Glyco_hydro_28	Fusarium oxysporum f. sp. niveum	GH28	n/a	YES		Q14TT4
comp180674_c0_seq1 len=540 path=[1:0-539]	540	n/a	BAE97094.1	477	Glyco_hydro_28	Fusarium oxysporum f. sp. spinaciae	GH28	n/a	YES		Q14TS5
comp180674_c0_seq1 len=540 path=[1:0-539]	540	n/a	ADA63834.1	477	Glyco_hydro_28	Fusarium oxysporum f. cubense RACE 1 / RACE 4	GH28	n/a	YES	3.2.1.67	D1MI97
comp180674_c0_seq1 len=540 path=[1:0-539]	540	n/a	BAE97070.1	477	Glyco_hydro_28	Fusarium oxysporum f. sp. lactucae	GH28	n/a	YES		Q14TU9
comp180674_c0_seq1 len=540 path=[1:0-539]	540	n/a	BAE97064.1	477	Glyco_hydro_28	Fusarium oxysporum f. sp. dianthi	GH28	n/a	YES		Q14TV4
comp180674_c0_seq1 len=540 path=[1:0-539]	540	n/a	BAE97081.1	477	Glyco_hydro_28	Fusarium oxysporum f. sp. melongenae	GH28	n/a	YES		Q14TT8
comp180674_c0_seq1 len=540 path=[1:0-539]	540	n/a	BAE97062.1	477	Glyco_hydro_28	Fusarium oxysporum f. sp. cucumerinum	GH28	n/a	YES		Q14TV6
comp180674_c0_seq1 len=540 path=[1:0-539]	540	n/a	BAE97073.1	477	Glyco_hydro_28	Fusarium oxysporum f. sp. lycopersici RACE 1	GH28	n/a	YES	3.2.1.67	Q14TT9
comp180674_c0_seq1 len=540 path=[1:0-539]	540	n/a	BAE97096.1	477	Glyco_hydro_28	Fusarium oxysporum f. sp. tracheiphilum	GH28	n/a	YES		Q14TS3
comp180674_c0_seq1 len=540 path=[1:0-539]	540	n/a	BAE97058.1	477	Glyco_hydro_28	Fusarium oxysporum f. sp. colocasiae	GH28	n/a	YES		Q14TW0
comp180674_c0_seq1 len=540 path=[1:0-539]	540	n/a	BAE97093.1	477	Glyco_hydro_28	Fusarium oxysporum f. sp. spinaciae	GH28	n/a	YES		Q14TS5
comp180674_c0_seq1 len=540 path=[1:0-539]	540	n/a	BAE97092.1	477	Glyco_hydro_28	Fusarium oxysporum f. sp. raphani	GH28	n/a	YES		Q14TS7
comp180674_c0_seq1 len=540 path=[1:0-539]	540	n/a	BAE97065.1	477	Glyco_hydro_28	Fusarium oxysporum f. sp. dianthi	GH28	n/a	YES		Q14TV4
comp180674_c0_seq1 len=540 path=[1:0-539]	540	n/a	BAE97072.1	477	Glyco_hydro_28	Fusarium oxysporum f. sp. lagenariae	GH28	n/a	YES		Q14TU7
comp180674_c0_seq1 len=540 path=[1:0-539]	540	n/a	BAE97095.1	477	Glyco_hydro_28	Fusarium oxysporum f. sp. tracheiphilum	GH28	n/a	YES		Q14TS3
comp180674_c0_seq1 len=540 path=[1:0-539]	540	n/a	BAE97071.1	477	Glyco_hydro_28	Fusarium oxysporum f. sp. lagenariae	GH28	n/a	YES		Q14TU7
comp180674_c0_seq1 len=540 path=[1:0-539]	540	n/a	BAE97067.1	477	Glyco_hydro_28	Fusarium oxysporum f. sp. fragariae	GH28	n/a	YES		Q14TV1
comp180674_c0_seq1 len=540 path=[1:0-539]	540	n/a	BAE97086.1	477	Glyco_hydro_28	Fusarium oxysporum f. sp. phaseoli	GH28	n/a	YES		Q14TT2
comp180674_c0_seq1 len=540 path=[1:0-539]	540	n/a	BAE97060.1	477	Glyco_hydro_28	Fusarium oxysporum f. sp. conglutinans	GH28	n/a	YES		Q14TV8
comp180674_c0_seq1 len=540 path=[1:0-539]	540	n/a	ADA63833.1	477	Glyco_hydro_28	Fusarium oxysporum f. cubense RACE 1 / RACE 4	GH28	n/a	YES	3.2.1.67	D1MI97
comp180674_c0_seq1 len=540 path=[1:0-539]	540	n/a	ACZ06598.1	477	Glyco_hydro_28	Fusarium oxysporum f. cubense RACE 1 / RACE 4	GH28	n/a	YES	3.2.1.67	D1MI97
comp180674_c0_seq1 len=540 path=[1:0-539]	540	n/a	BAE97059.1	477	Glyco_hydro_28	Fusarium oxysporum f. sp. colocasiae	GH28	n/a	YES		Q14TW0
comp180674_c0_seq1 len=540 path=[1:0-539]	540	n/a	BAE97084.1	477	Glyco_hydro_28	Fusarium oxysporum f. sp. niveum	GH28	n/a	YES		Q14TT4
comp180674_c0_seq1 len=540 path=[1:0-539]	540	n/a	BAE97091.1	477	Glyco_hydro_28	Fusarium oxysporum f. sp. raphani	GH28	n/a	YES		Q14TS7
comp180674_c0_seq1 len=540 path=[1:0-539]	540	n/a	BAE97069.1	477	Glyco_hydro_28	Fusarium oxysporum f. sp. lactucae	GH28	n/a	YES		Q14TU9
comp180674_c0_seq1 len=540 path=[1:0-539]	540	n/a	BAE97061.1	477	Glyco_hydro_28	Fusarium oxysporum f. sp. conglutinans	GH28	n/a	YES		Q14TV8
comp180674_c0_seq1 len=540 path=[1:0-539]	540	n/a	BAE97074.1	477	Glyco_hydro_28	Fusarium oxysporum f. sp. lycopersici RACE 1	GH28	n/a	YES	3.2.1.67	Q14TT9
comp180674_c0_seq1 len=540 path=[1:0-539]	540	n/a	BAE97063.1	477	Glyco_hydro_28	Fusarium oxysporum f. sp. cucumerinum	GH28	n/a	YES		Q14TV6
comp180674_c0_seq1 len=540 path=[1:0-539]	540	n/a	BAE97068.1	477	Glyco_hydro_28	Fusarium oxysporum f. sp. fragariae	GH28	n/a	YES		Q14TV1
comp180674_c0_seq1 len=540 path=[1:0-539]	540	n/a	BAE97066.1	477	Glyco_hydro_28	Fusarium oxysporum f. sp. fragariae	GH28	n/a	YES		Q14TV1
comp180674_c0_seq1 len=540 path=[1:0-539]	540	n/a	AGC92170.1	405	Glyco_hydro_28	Fusarium oxysporum f. sp. ciceris	GH28	n/a	NO
comp180674_c0_seq1 len=540 path=[1:0-539]	540	n/a	BAE97053.1	477	Glyco_hydro_28	Fusarium oxysporum f. sp. lycopersici RACE 1	GH28	n/a	YES	3.2.1.67	Q14TT9
comp9574_c0_seq1 len=4040 path=[1:0-718 856:719-881 1078:882-974 1171:975-1038 1235:1039-1050 1247:1051-1758 1955:1759-1861 2058:1862-1919 2116:1920-2521 2775:2522-4039]	4040	Fungal_trans|Zn_clus	BAE64464.1	1388	Fungal_trans	Aspergillus oryzae RIB40	GH28	NO	NO		Q2U1V1
comp203716_c0_seq1 len=275 path=[253:0-274]	275	n/a	XP_327247.1	473	Glyco_hydro_28	Neurospora crassa OR74A	GH28	n/a	NO
comp4141_c0_seq1 len=2774 path=[2752:0-591 3344:592-2773]	2774	Fungal_trans|Zn_clus	BAE64464.1	1388	Fungal_trans	Aspergillus oryzae RIB40	GH28	NO	NO		Q2U1V1
comp9574_c0_seq10 len=4235 path=[1:0-718 720:719-854 856:855-1017 1019:1018-1076 1078:1077-1169 1171:1170-1233 1235:1234-1245 1247:1246-1953 1955:1954-2056 2058:2057-2114 2116:2115-2716 2775:2717-4234]	4235	Fungal_trans|Zn_clus	BAE64464.1	1388	Fungal_trans	Aspergillus oryzae RIB40	GH28	NO	NO		Q2U1V1
comp9574_c0_seq4 len=4234 path=[1:0-718 720:719-854 856:855-1017 1019:1018-1076 1078:1077-1169 1171:1170-1233 1235:1234-1245 1247:1246-1953 1955:1954-2056 2116:2057-2658 2718:2659-2715 2775:2716-4233]	4234	Fungal_trans|Zn_clus	BAE64464.1	1388	Fungal_trans	Aspergillus oryzae RIB40	GH28	NO	NO		Q2U1V1
comp8348_c0_seq3 len=4855 path=[5278:0-4809 10615:4810-4819 435:4820-4854]	4855	Abhydrolase_5|Abhydrolase_6|Fungal_trans|Zn_clus	BAE64464.1	1388	Fungal_trans	Aspergillus oryzae RIB40	GH28	NO	NO		Q2U1V1
comp9263_c0_seq8 len=6446 path=[6273:0-2901 12747:2902-2995 9175:2996-3628 13060:3629-3685 9808:3686-4158 10281:4159-4719 10842:4720-6445]	6446	Amidohydro_2|Fungal_trans|Zn_clus	BAE64464.1	1388	Fungal_trans	Aspergillus oryzae RIB40	GH28	NO	NO		Q2U1V1
comp9574_c0_seq23 len=4039 path=[1:0-718 856:719-881 1078:882-974 1171:975-1038 1235:1039-1050 1247:1051-1758 1955:1759-1861 2116:1862-2463 2718:2464-2520 2775:2521-4038]	4039	Fungal_trans|Zn_clus	BAE64464.1	1388	Fungal_trans	Aspergillus oryzae RIB40	GH28	NO	NO		Q2U1V1
comp9574_c0_seq5 len=3998 path=[1:0-718 720:719-854 856:855-1017 1019:1018-1076 1078:1077-1169 1247:1170-1877 2116:1878-2479 2775:2480-3997]	3998	Fungal_trans|Zn_clus	BAE64464.1	1388	Fungal_trans	Aspergillus oryzae RIB40	GH28	NO	NO		Q2U1V1
comp9574_c0_seq14 len=4175 path=[1:0-718 720:719-854 856:855-1017 1078:1018-1110 1171:1111-1174 1235:1175-1186 1247:1187-1894 1955:1895-1997 2116:1998-2599 2718:2600-2656 2775:2657-4174]	4175	Fungal_trans|Zn_clus	BAE64464.1	1388	Fungal_trans	Aspergillus oryzae RIB40	GH28	NO	NO		Q2U1V1
comp9574_c0_seq11 len=4159 path=[1:0-718 720:719-854 856:855-1017 1019:1018-1076 1078:1077-1169 1247:1170-1877 1955:1878-1980 2058:1981-2038 2116:2039-2640 2775:2641-4158]	4159	Fungal_trans|Zn_clus	BAE64464.1	1388	Fungal_trans	Aspergillus oryzae RIB40	GH28	NO	NO		Q2U1V1
comp9263_c0_seq1 len=6295 path=[6273:0-2901 9175:2902-3534 9808:3535-4007 10281:4008-4568 10842:4569-6294]	6295	Amidohydro_2|Fungal_trans|Zn_clus	BAE64464.1	1388	Fungal_trans	Aspergillus oryzae RIB40	GH28	NO	NO		Q2U1V1
comp9574_c0_seq2 len=4233 path=[1:0-718 720:719-854 856:855-1017 1078:1018-1110 1171:1111-1174 1235:1175-1186 1247:1187-1894 1955:1895-1997 2058:1998-2055 2116:2056-2657 2718:2658-2714 2775:2715-4232]	4233	Fungal_trans|Zn_clus	BAE64464.1	1388	Fungal_trans	Aspergillus oryzae RIB40	GH28	NO	NO		Q2U1V1
comp4141_c0_seq2 len=2842 path=[2752:0-591 5617:592-659 3344:660-2841]	2842	Fungal_trans|Zn_clus	BAE64464.1	1388	Fungal_trans	Aspergillus oryzae RIB40	GH28	NO	NO		Q2U1V1
comp9574_c0_seq28 len=4101 path=[1:0-718 720:719-854 856:855-1017 1019:1018-1076 1078:1077-1169 1247:1170-1877 1955:1878-1980 2116:1981-2582 2775:2583-4100]	4101	Fungal_trans|Zn_clus	BAE64464.1	1388	Fungal_trans	Aspergillus oryzae RIB40	GH28	NO	NO		Q2U1V1
comp7730_c0_seq2 len=4802 path=[4720:0-1572 6293:1573-1659 6380:1660-3029 9462:3030-3089 7750:3090-4801]	4802	Glyco_hydro_28	CCD44029.1	427	Glyco_hydro_28	Botryotinia fuckeliana	GH28	YES	NO
comp9574_c0_seq25 len=4131 path=[1:0-718 720:719-854 856:855-1017 1019:1018-1076 1078:1077-1169 1171:1170-1233 1235:1234-1245 1247:1246-1953 2116:1954-2555 2718:2556-2612 2775:2613-4130]	4131	Fungal_trans|Zn_clus	BAE64464.1	1388	Fungal_trans	Aspergillus oryzae RIB40	GH28	NO	NO		Q2U1V1
comp8511_c0_seq1 len=3904 path=[1:0-766 768:767-3724 3726:3725-3903]	3904	Zn_clus|Fungal_trans	BAE64464.1	1388	Fungal_trans	Aspergillus oryzae RIB40	GH28	NO	NO		Q2U1V1
comp381315_c0_seq1 len=308 path=[286:0-307]	308	Glyco_hydro_28	BAE97087.1	477	Glyco_hydro_28	Fusarium oxysporum f. sp. phaseoli	GH28	YES	NO		Q14TT2
comp381315_c0_seq1 len=308 path=[286:0-307]	308	Glyco_hydro_28	BAE97085.1	477	Glyco_hydro_28	Fusarium oxysporum f. sp. niveum	GH28	YES	NO		Q14TT4
comp381315_c0_seq1 len=308 path=[286:0-307]	308	Glyco_hydro_28	BAE97094.1	477	Glyco_hydro_28	Fusarium oxysporum f. sp. spinaciae	GH28	YES	NO		Q14TS5
comp381315_c0_seq1 len=308 path=[286:0-307]	308	Glyco_hydro_28	BAE97075.1	477	Glyco_hydro_28	Fusarium oxysporum f. sp. lycopersici RACE 1	GH28	YES	NO	3.2.1.67	Q14TT9
comp381315_c0_seq1 len=308 path=[286:0-307]	308	Glyco_hydro_28	BAE97070.1	477	Glyco_hydro_28	Fusarium oxysporum f. sp. lactucae	GH28	YES	NO		Q14TU9
comp381315_c0_seq1 len=308 path=[286:0-307]	308	Glyco_hydro_28	ACU01939.1	295	Glyco_hydro_28	Fusarium oxysporum f. sp. canariensis NRRL 26035	GH28	YES	YES		C7B5W5
comp381315_c0_seq1 len=308 path=[286:0-307]	308	Glyco_hydro_28	BAE97064.1	477	Glyco_hydro_28	Fusarium oxysporum f. sp. dianthi	GH28	YES	NO		Q14TV4
comp381315_c0_seq1 len=308 path=[286:0-307]	308	Glyco_hydro_28	ACU01947.1	295	Glyco_hydro_28	Fusarium oxysporum f. sp. erythroxyli NRRL 26574	GH28	YES	YES		C7B5X3
comp381315_c0_seq1 len=308 path=[286:0-307]	308	Glyco_hydro_28	ACU01938.1	295	Glyco_hydro_28	Fusarium oxysporum f. sp. batatas NRRL 26409	GH28	YES	YES		C7B5W4
comp381315_c0_seq1 len=308 path=[286:0-307]	308	Glyco_hydro_28	BAE97076.1	477	Glyco_hydro_28	Fusarium oxysporum f. sp. lycopersici RACE 2	GH28	YES	NO		Q14TU2
comp381315_c0_seq1 len=308 path=[286:0-307]	308	Glyco_hydro_28	BAE97062.1	477	Glyco_hydro_28	Fusarium oxysporum f. sp. cucumerinum	GH28	YES	NO		Q14TV6
comp381315_c0_seq1 len=308 path=[286:0-307]	308	Glyco_hydro_28	BAE97081.1	477	Glyco_hydro_28	Fusarium oxysporum f. sp. melongenae	GH28	YES	NO		Q14TT8
comp381315_c0_seq1 len=308 path=[286:0-307]	308	Glyco_hydro_28	BAE97073.1	477	Glyco_hydro_28	Fusarium oxysporum f. sp. lycopersici RACE 1	GH28	YES	NO	3.2.1.67	Q14TT9
comp381315_c0_seq1 len=308 path=[286:0-307]	308	Glyco_hydro_28	BAE97096.1	477	Glyco_hydro_28	Fusarium oxysporum f. sp. tracheiphilum	GH28	YES	NO		Q14TS3
comp381315_c0_seq1 len=308 path=[286:0-307]	308	Glyco_hydro_28	BAE97058.1	477	Glyco_hydro_28	Fusarium oxysporum f. sp. colocasiae	GH28	YES	NO		Q14TW0
comp381315_c0_seq1 len=308 path=[286:0-307]	308	Glyco_hydro_28	ACU01902.1	295	Glyco_hydro_28	Fusarium oxysporum f. sp. lycopersici RACE 3	GH28	YES	YES		Q14TT9
comp381315_c0_seq1 len=308 path=[286:0-307]	308	Glyco_hydro_28	BAE97093.1	477	Glyco_hydro_28	Fusarium oxysporum f. sp. spinaciae	GH28	YES	NO		Q14TS5
comp381315_c0_seq1 len=308 path=[286:0-307]	308	Glyco_hydro_28	BAE97092.1	477	Glyco_hydro_28	Fusarium oxysporum f. sp. raphani	GH28	YES	NO		Q14TS7
comp381315_c0_seq1 len=308 path=[286:0-307]	308	Glyco_hydro_28	BAE97065.1	477	Glyco_hydro_28	Fusarium oxysporum f. sp. dianthi	GH28	YES	NO		Q14TV4
comp381315_c0_seq1 len=308 path=[286:0-307]	308	Glyco_hydro_28	BAE97072.1	477	Glyco_hydro_28	Fusarium oxysporum f. sp. lagenariae	GH28	YES	NO		Q14TU7
comp381315_c0_seq1 len=308 path=[286:0-307]	308	Glyco_hydro_28	ACU01951.1	295	Glyco_hydro_28	Fusarium oxysporum f. sp. passiflorae NRRL 22549	GH28	YES	YES		C7B5X7
comp381315_c0_seq1 len=308 path=[286:0-307]	308	Glyco_hydro_28	ACU01940.1	295	Glyco_hydro_28	Fusarium oxysporum f. cubense NRRL 25603	GH28	YES	YES		C7B5W6
comp381315_c0_seq1 len=308 path=[286:0-307]	308	Glyco_hydro_28	BAE97095.1	477	Glyco_hydro_28	Fusarium oxysporum f. sp. tracheiphilum	GH28	YES	NO		Q14TS3
comp381315_c0_seq1 len=308 path=[286:0-307]	308	Glyco_hydro_28	BAE97097.1	477	Glyco_hydro_28	Fusarium oxysporum f. sp. tulipae	GH28	YES	NO		Q14TS1
comp381315_c0_seq1 len=308 path=[286:0-307]	308	Glyco_hydro_28	BAE97071.1	477	Glyco_hydro_28	Fusarium oxysporum f. sp. lagenariae	GH28	YES	NO		Q14TU7
comp381315_c0_seq1 len=308 path=[286:0-307]	308	Glyco_hydro_28	BAE97067.1	477	Glyco_hydro_28	Fusarium oxysporum f. sp. fragariae	GH28	YES	NO		Q14TV1
comp381315_c0_seq1 len=308 path=[286:0-307]	308	Glyco_hydro_28	ACZ06599.1	477	Glyco_hydro_28	Fusarium oxysporum f. cubense	GH28	YES	NO		D1MI98
comp381315_c0_seq1 len=308 path=[286:0-307]	308	Glyco_hydro_28	ACU01949.1	295	Glyco_hydro_28	Fusarium oxysporum f. sp. melonis	GH28	YES	YES		Q14TT7
comp381315_c0_seq1 len=308 path=[286:0-307]	308	Glyco_hydro_28	BAE97086.1	477	Glyco_hydro_28	Fusarium oxysporum f. sp. phaseoli	GH28	YES	NO		Q14TT2
comp381315_c0_seq1 len=308 path=[286:0-307]	308	Glyco_hydro_28	BAE97060.1	477	Glyco_hydro_28	Fusarium oxysporum f. sp. conglutinans	GH28	YES	NO		Q14TV8
comp381315_c0_seq1 len=308 path=[286:0-307]	308	Glyco_hydro_28	XP_387727.1	478	Glyco_hydro_28	Fusarium graminearum PH-1	GH28	YES	NO
comp381315_c0_seq1 len=308 path=[286:0-307]	308	Glyco_hydro_28	AGC92171.1	304	Glyco_hydro_28	Fusarium oxysporum f. sp. ciceris	GH28	YES	YES
comp381315_c0_seq1 len=308 path=[286:0-307]	308	Glyco_hydro_28	ADA63833.1	477	Glyco_hydro_28	Fusarium oxysporum f. cubense RACE 1 / RACE 4	GH28	YES	NO	3.2.1.67	D1MI97
comp381315_c0_seq1 len=308 path=[286:0-307]	308	Glyco_hydro_28	ACZ06598.1	477	Glyco_hydro_28	Fusarium oxysporum f. cubense RACE 1 / RACE 4	GH28	YES	NO	3.2.1.67	D1MI97
comp381315_c0_seq1 len=308 path=[286:0-307]	308	Glyco_hydro_28	ACU01953.1	295	Glyco_hydro_28	Fusarium oxysporum f. tuberosi NRRL 22555	GH28	YES	YES		C7B5X9
comp381315_c0_seq1 len=308 path=[286:0-307]	308	Glyco_hydro_28	BAE97059.1	477	Glyco_hydro_28	Fusarium oxysporum f. sp. colocasiae	GH28	YES	NO		Q14TW0
comp381315_c0_seq1 len=308 path=[286:0-307]	308	Glyco_hydro_28	BAE97084.1	477	Glyco_hydro_28	Fusarium oxysporum f. sp. niveum	GH28	YES	NO		Q14TT4
comp381315_c0_seq1 len=308 path=[286:0-307]	308	Glyco_hydro_28	BAE97091.1	477	Glyco_hydro_28	Fusarium oxysporum f. sp. raphani	GH28	YES	NO		Q14TS7
comp381315_c0_seq1 len=308 path=[286:0-307]	308	Glyco_hydro_28	BAE97069.1	477	Glyco_hydro_28	Fusarium oxysporum f. sp. lactucae	GH28	YES	NO		Q14TU9
comp381315_c0_seq1 len=308 path=[286:0-307]	308	Glyco_hydro_28	BAE97061.1	477	Glyco_hydro_28	Fusarium oxysporum f. sp. conglutinans	GH28	YES	NO		Q14TV8
comp381315_c0_seq1 len=308 path=[286:0-307]	308	Glyco_hydro_28	BAE97074.1	477	Glyco_hydro_28	Fusarium oxysporum f. sp. lycopersici RACE 1	GH28	YES	NO	3.2.1.67	Q14TT9
comp381315_c0_seq1 len=308 path=[286:0-307]	308	Glyco_hydro_28	ACU01918.1	295	Glyco_hydro_28	Fusarium oxysporum f. sp. radicis-lycopersici	GH28	YES	YES		Q14TS9
comp381315_c0_seq1 len=308 path=[286:0-307]	308	Glyco_hydro_28	ACU01948.1	295	Glyco_hydro_28	Fusarium oxysporum f. sp. glycines NRRL 25598	GH28	YES	YES		C7B5X4
comp381315_c0_seq1 len=308 path=[286:0-307]	308	Glyco_hydro_28	BAE97063.1	477	Glyco_hydro_28	Fusarium oxysporum f. sp. cucumerinum	GH28	YES	NO		Q14TV6
comp381315_c0_seq1 len=308 path=[286:0-307]	308	Glyco_hydro_28	BAE97068.1	477	Glyco_hydro_28	Fusarium oxysporum f. sp. fragariae	GH28	YES	NO		Q14TV1
comp381315_c0_seq1 len=308 path=[286:0-307]	308	Glyco_hydro_28	BAE97077.1	477	Glyco_hydro_28	Fusarium oxysporum f. sp. lycopersici RACE 2	GH28	YES	NO		Q14TU2
comp381315_c0_seq1 len=308 path=[286:0-307]	308	Glyco_hydro_28	BAE97054.1	477	Glyco_hydro_28	Fusarium oxysporum f. sp. lycopersici RACE 2	GH28	YES	NO		Q14TU2
comp381315_c0_seq1 len=308 path=[286:0-307]	308	Glyco_hydro_28	BAE97066.1	477	Glyco_hydro_28	Fusarium oxysporum f. sp. fragariae	GH28	YES	NO		Q14TV1
comp381315_c0_seq1 len=308 path=[286:0-307]	308	Glyco_hydro_28	AGC92170.1	405	Glyco_hydro_28	Fusarium oxysporum f. sp. ciceris	GH28	YES	NO
comp381315_c0_seq1 len=308 path=[286:0-307]	308	Glyco_hydro_28	ACU01952.1	295	Glyco_hydro_28	Fusarium oxysporum f. perniciosum NRRL 22550	GH28	YES	YES		C7B5X8
comp381315_c0_seq1 len=308 path=[286:0-307]	308	Glyco_hydro_28	BAE97053.1	477	Glyco_hydro_28	Fusarium oxysporum f. sp. lycopersici RACE 1	GH28	YES	NO	3.2.1.67	Q14TT9
comp381315_c0_seq1 len=308 path=[286:0-307]	308	Glyco_hydro_28	BAE97098.1	477	Glyco_hydro_28	Fusarium oxysporum f. sp. tulipae	GH28	YES	NO		Q14TS1
comp4023_c0_seq2 len=4757 path=[4735:0-2249 6985:2250-4756]	4757	Fungal_trans|Zn_clus	BAE64464.1	1388	Fungal_trans	Aspergillus oryzae RIB40	GH28	NO	NO		Q2U1V1
comp10603_c0_seq1 len=4565 path=[4543:0-4564]	4565	Zn_clus|Fungal_trans	BAE64464.1	1388	Fungal_trans	Aspergillus oryzae RIB40	GH28	NO	NO		Q2U1V1
comp9574_c0_seq12 len=4216 path=[1:0-718 720:719-854 856:855-1017 1019:1018-1076 1078:1077-1169 1247:1170-1877 1955:1878-1980 2058:1981-2038 2116:2039-2640 2718:2641-2697 2775:2698-4215]	4216	Fungal_trans|Zn_clus	BAE64464.1	1388	Fungal_trans	Aspergillus oryzae RIB40	GH28	NO	NO		Q2U1V1
comp9714_c0_seq6 len=7351 path=[7517:0-414 7932:415-1301 9007:1302-4566 12272:4567-5133 12839:5134-5427 13133:5428-6373 14079:6374-7350]	7351	Zn_clus|Fungal_trans|DUF1445	BAE64464.1	1388	Fungal_trans	Aspergillus oryzae RIB40	GH28	NO	NO		Q2U1V1
comp9565_c0_seq2 len=5746 path=[5819:0-4917 16623:4918-4920 15820:4921-5013 2201:5014-5649 2837:5650-5745]	5746	DUF3533|Glyco_hydro_28	AEO70983.1	376	Glyco_hydro_28	Thielavia terrestris NRRL 8126	GH28	NO	NO
comp9574_c0_seq13 len=4074 path=[1:0-718 720:719-854 856:855-1017 1019:1018-1076 1078:1077-1169 1171:1170-1233 1235:1234-1245 1247:1246-1953 2116:1954-2555 2775:2556-4073]	4074	Fungal_trans|Zn_clus	BAE64464.1	1388	Fungal_trans	Aspergillus oryzae RIB40	GH28	NO	NO		Q2U1V1
comp9574_c0_seq29 len=4292 path=[1:0-718 720:719-854 856:855-1017 1019:1018-1076 1078:1077-1169 1171:1170-1233 1235:1234-1245 1247:1246-1953 1955:1954-2056 2058:2057-2114 2116:2115-2716 2718:2717-2773 2775:2774-4291]	4292	Fungal_trans|Zn_clus	BAE64464.1	1388	Fungal_trans	Aspergillus oryzae RIB40	GH28	NO	NO		Q2U1V1
comp9263_c0_seq7 len=6389 path=[6273:0-2901 12747:2902-2995 9175:2996-3628 9808:3629-4101 10281:4102-4662 10842:4663-6388]	6389	Amidohydro_2|Fungal_trans|Zn_clus	BAE64464.1	1388	Fungal_trans	Aspergillus oryzae RIB40	GH28	NO	NO		Q2U1V1
comp9574_c0_seq24 len=4158 path=[1:0-718 720:719-854 856:855-1017 1019:1018-1076 1078:1077-1169 1247:1170-1877 1955:1878-1980 2116:1981-2582 2718:2583-2639 2775:2640-4157]	4158	Fungal_trans|Zn_clus	BAE64464.1	1388	Fungal_trans	Aspergillus oryzae RIB40	GH28	NO	NO		Q2U1V1
comp88545_c0_seq1 len=1305 path=[1283:0-1304]	1305	n/a	AFO78702.1	796	Alpha_L_fucos	Amycolatopsis mediterranei S699	GH29	n/a	NO
comp88545_c0_seq1 len=1305 path=[1283:0-1304]	1305	n/a	ADJ46991.1	796	Alpha_L_fucos	Amycolatopsis mediterranei U32	GH29	n/a	NO		D8I2W6
comp41278_c0_seq1 len=407 path=[1:0-406]	407	Alpha_L_fucos	CBX99860.1	755	Alpha_L_fucos	Leptosphaeria maculans v23.1.3	GH29	YES	NO		E5A8B5
comp160767_c0_seq1 len=610 path=[1:0-609]	610	Alpha_L_fucos	CAK41610.1	544	Alpha_L_fucos	Aspergillus niger CBS 513.88	GH29	YES	YES		A2R1R0
comp9271_c0_seq4 len=5259 path=[1:0-988 993:989-2144 2149:2145-4024 4273:4025-5258]	5259	n/a	AEO64229.1	968	Glyco_hydro_3	Thielavia terrestris NRRL 8126	GH3	n/a	NO
comp9579_c0_seq11 len=1876 path=[7053:0-82 7143:83-384 7445:385-443 7504:444-1875]	1876	Glyco_hydro_3	BAE59617.1	669	Glyco_hydro_3	Aspergillus oryzae RIB40	GH3	YES	NO		Q2UFP8
comp8313_c0_seq2 len=1513 path=[1491:0-136 1628:137-1105 2597:1106-1512]	1513	Beta-lactamase	AEN73852.1	981	Glyco_hydro_3|Glyco_hydro_3_C|Beta-lactamase	Rhodothermus marinus SG0.5JP17-172	GH3	NO	NO
comp8313_c0_seq2 len=1513 path=[1491:0-136 1628:137-1105 2597:1106-1512]	1513	Beta-lactamase	ACY47819.1	979	Glyco_hydro_3|Glyco_hydro_3_C|Beta-lactamase	Rhodothermus marinus DSM 4252	GH3	NO	NO		D0MH34
comp8313_c0_seq2 len=1513 path=[1491:0-136 1628:137-1105 2597:1106-1512]	1513	Beta-lactamase	ACT95409.1	1031	Glyco_hydro_3|Beta-lactamase	Dyadobacter fermentans DSM 18053	GH3	NO	NO		C6W0V4
comp2837_c0_seq2 len=6331 path=[6309:0-5136 11446:5137-6330]	6331	Fn3-like|Glyco_hydro_3_C|Glyco_hydro_3	CAP73569.1	884	Glyco_hydro_3|Glyco_hydro_3_C|Fn3-like	Podospora anserina S mat+	GH3	NO	NO		B2B6Z1
comp6325_c0_seq1 len=3317 path=[1:0-1540 1542:1541-3316]	3317	Glyco_hydro_3_C|Fn3-like|Fungal_trans	CAY71242.1	852	Glyco_hydro_3|Glyco_hydro_3_C|PA14|Fn3-like	Pichia pastoris GS115	GH3	NO	NO		C4R6L7
comp6325_c0_seq1 len=3317 path=[1:0-1540 1542:1541-3316]	3317	Glyco_hydro_3_C|Fn3-like|Fungal_trans	CCA41153.1	852	Glyco_hydro_3|Glyco_hydro_3_C|PA14|Fn3-like	Pichia pastoris CBS 7435	GH3	NO	NO
comp8453_c0_seq1 len=9098 path=[9941:0-3165 13112:3166-8554 20129:8555-8610 18501:8611-8702 18593:8703-8999 20208:9000-9097]	9098	Fn3-like|Glyco_hydro_3_C|Glyco_hydro_3	CCD56845.1	790	Glyco_hydro_3|Glyco_hydro_3_C|Fn3-like	Botryotinia fuckeliana	GH3	NO	NO
comp81342_c0_seq1 len=384 path=[1:0-383]	384	n/a	BAE64689.1	835	Glyco_hydro_3|Glyco_hydro_3_C	Aspergillus oryzae RIB40	GH3	n/a	NO		Q2U176
comp88545_c0_seq1 len=1305 path=[1283:0-1304]	1305	n/a	ACU73743.1	1225	Glyco_hydro_3|Glyco_hydro_3_C|Fn3-like	Catenulispora acidiphila DSM 44928	GH3	n/a	YES		C7Q1L4
comp9208_c0_seq4 len=1496 path=[3391:0-727 4119:728-783 4175:784-1183 4576:1184-1361 6920:1362-1412 4754:1413-1495]	1496	Glyco_hydro_3|Glyco_hydro_3	AEO63458.1	705	Glyco_hydro_3|Glyco_hydro_3_C|Fn3-like	Thielavia terrestris NRRL 8126	GH3	NO	NO
comp9579_c0_seq4 len=5255 path=[5289:0-1248 6596:1249-1597 11522:1598-1606 7019:1607-1640 7053:1641-1723 11063:1724-1772 11112:1773-1849 7136:1850-1856 7143:1857-2158 7504:2159-3590 8936:3591-5254]	5255	Peptidase_C2|Glyco_hydro_3	XP_365193.1	635	Glyco_hydro_3	Magnaporthe grisea 70-15	GH3	NO	NO		G4N9A6
comp11371_c0_seq1 len=2817 path=[2795:0-2816]	2817	Glyco_hydro_3|Glyco_hydro_3_C|Fn3-like	CAP73666.1	783	Glyco_hydro_3|Glyco_hydro_3_C|Fn3-like	Podospora anserina S mat+	GH3	YES	NO		B2B788
comp6459_c0_seq2 len=1799 path=[1:0-388 390:389-1171 3543:1172-1227 1173:1228-1798]	1799	MFS_1|MFS_1	BAE65591.1	810	Glyco_hydro_3|Glyco_hydro_3_C	Aspergillus oryzae RIB40	GH3	NO	NO		Q2TYT2
comp8453_c0_seq4 len=10014 path=[9941:0-3165 13112:3166-8554 20129:8555-8610 18501:8611-8702 18593:8703-8999 18890:9000-10013]	10014	Fn3-like|Glyco_hydro_3_C|Glyco_hydro_3	CCD56845.1	790	Glyco_hydro_3|Glyco_hydro_3_C|Fn3-like	Botryotinia fuckeliana	GH3	NO	NO
comp8453_c0_seq6 len=469 path=[19955:0-73 18593:74-370 20208:371-468]	469	Glyco_hydro_3	CAP98759.1	794	Glyco_hydro_3|Glyco_hydro_3_C|Fn3-like	Penicillium chrysogenum Wisconsin 54-1255	GH3	NO	NO		B6HVA8
comp9208_c0_seq1 len=3412 path=[3391:0-727 4119:728-783 4175:784-1183 4576:1184-1361 4754:1362-1444 4837:1445-1449 4842:1450-2862 6255:2863-3411]	3412	Glyco_hydro_3|Glyco_hydro_3|Glyco_hydro_3_C|Fn3-like	AEO63458.1	705	Glyco_hydro_3|Glyco_hydro_3_C|Fn3-like	Thielavia terrestris NRRL 8126	GH3	NO	NO
comp8446_c0_seq1 len=7264 path=[7163:0-2681 9845:2682-4981 12145:4982-6125 14742:6126-6238 13289:6239-7263]	7264	Lyase_1|ADSL_C|zf-C2HC5|Fn3-like|Glyco_hydro_3_C|Glyco_hydro_3	AEO58343.1	746	Glyco_hydro_3|Glyco_hydro_3_C|Fn3-like	Myceliophthora thermophila ATCC 42464	GH3	NO	NO	3.2.1.21
comp9579_c0_seq12 len=5513 path=[5289:0-1248 6538:1249-1306 6596:1307-1655 6945:1656-1720 11522:1721-1729 10600:1730-1864 7019:1865-1898 7053:1899-1981 11063:1982-2030 11112:2031-2107 7136:2108-2114 7143:2115-2416 7504:2417-3848 8936:3849-5512]	5513	Peptidase_C2|Glyco_hydro_3	XP_365193.1	635	Glyco_hydro_3	Magnaporthe grisea 70-15	GH3	NO	NO		G4N9A6
comp9271_c0_seq3 len=3378 path=[11029:0-19 2149:20-1899 4029:1900-2143 4273:2144-3377]	3378	n/a	AEO64229.1	968	Glyco_hydro_3	Thielavia terrestris NRRL 8126	GH3	n/a	NO
comp34804_c0_seq1 len=442 path=[420:0-441]	442	Glyco_hydro_3_C	BAE62494.1	777	Glyco_hydro_3|Glyco_hydro_3_C|Fn3-like	Aspergillus oryzae RIB40	GH3	NO	NO		Q2U7H1
comp9271_c0_seq2 len=5503 path=[1:0-988 993:989-2144 2149:2145-4024 4029:4025-4268 4273:4269-5502]	5503	n/a	AEO64229.1	968	Glyco_hydro_3	Thielavia terrestris NRRL 8126	GH3	n/a	NO
comp2837_c0_seq1 len=1280 path=[12617:0-85 11446:86-1279]	1280	Glyco_hydro_3	AEO56238.1	916	Glyco_hydro_3|Glyco_hydro_3_C|Fn3-like	Myceliophthora thermophila ATCC 42464	GH3	NO	NO
comp3286_c0_seq1 len=1289 path=[1267:0-965 2233:966-1288]	1289	Fn3-like	XP_360965.1	779	Glyco_hydro_3|Glyco_hydro_3_C|Fn3-like	Magnaporthe grisea 70-15	GH3	NO	NO	3.2.1.21	G4N7Z0
comp54077_c0_seq1 len=765 path=[1:0-764]	765	Glyco_hydro_3	BAE62494.1	777	Glyco_hydro_3|Glyco_hydro_3_C|Fn3-like	Aspergillus oryzae RIB40	GH3	NO	YES		Q2U7H1
comp12786_c0_seq1 len=2534 path=[1:0-2533]	2534	Glyco_hydro_3_C|Glyco_hydro_3	ACH26685.1	753	Glyco_hydro_3|Glyco_hydro_3_C|Fn3-like	Trichoderma reesei QM6A	GH3	NO	NO		Q7Z9M0
comp12249_c0_seq1 len=655 path=[1:0-654]	655	Glyco_hydro_3_C|Fn3-like	XP_362540.1	849	Glyco_hydro_3|Glyco_hydro_3_C|PA14|Fn3-like	Magnaporthe grisea 70-15	GH3	NO	NO
comp9579_c0_seq3 len=5372 path=[5289:0-1248 6538:1249-1306 6596:1307-1655 11522:1656-1664 7019:1665-1698 7053:1699-1781 11063:1782-1830 11112:1831-1907 7136:1908-1914 7143:1915-2216 7445:2217-2275 7504:2276-3707 8936:3708-5371]	5372	Peptidase_C2|Glyco_hydro_3	XP_365193.1	635	Glyco_hydro_3	Magnaporthe grisea 70-15	GH3	NO	NO		G4N9A6
comp34882_c0_seq1 len=1033 path=[1:0-1032]	1033	n/a	AEN99939.1	1119	Glyco_hydro_3|Glyco_hydro_3_C|Fn3-like	Chrysosporium lucknowense VKM F-3500-D / C1	GH3	n/a	YES	3.2.1.21
comp66237_c0_seq1 len=1049 path=[1:0-1048]	1049	Glyco_hydro_3	BAI82526.1	818	Glyco_hydro_3|Glyco_hydro_3_C	Aureobasidium pullulans var. melanogenum ATCC 20524	GH3	NO	NO	3.2.1.37	D4AHT5
comp6058_c1_seq1 len=3525 path=[7485:0-3524]	3525	Fn3-like|Glyco_hydro_3_C|Glyco_hydro_3	BAE64040.1	828	Glyco_hydro_3|Glyco_hydro_3_C|Fn3-like	Aspergillus oryzae RIB40	GH3	NO	NO		Q2U325
comp8453_c0_seq3 len=9958 path=[9941:0-3165 13112:3166-8554 18501:8555-8646 18593:8647-8943 18890:8944-9957]	9958	Fn3-like|Glyco_hydro_3_C|Glyco_hydro_3	CCD56845.1	790	Glyco_hydro_3|Glyco_hydro_3_C|Fn3-like	Botryotinia fuckeliana	GH3	NO	NO
comp8453_c0_seq5 len=9042 path=[9941:0-3165 13112:3166-8554 18501:8555-8646 18593:8647-8943 20208:8944-9041]	9042	Fn3-like|Glyco_hydro_3_C|Glyco_hydro_3	CCD56845.1	790	Glyco_hydro_3|Glyco_hydro_3_C|Fn3-like	Botryotinia fuckeliana	GH3	NO	NO
comp9579_c0_seq9 len=1817 path=[7053:0-82 7143:83-384 7504:385-1816]	1817	Glyco_hydro_3	BAE59617.1	669	Glyco_hydro_3	Aspergillus oryzae RIB40	GH3	YES	NO		Q2UFP8
comp80383_c0_seq1 len=488 path=[466:0-487]	488	Glyco_hydro_3_C	BAG82824.1	817	Glyco_hydro_3|Glyco_hydro_3_C	Aspergillus japonicus MU-2	GH3	NO	NO	3.2.1.37	B6EY09
comp176255_c0_seq1 len=223 path=[1:0-222]	223	n/a	BAE64689.1	835	Glyco_hydro_3|Glyco_hydro_3_C	Aspergillus oryzae RIB40	GH3	n/a	NO		Q2U176
comp6058_c0_seq1 len=5630 path=[9362:0-5629]	5630	Glyco_hydro_3|Aminotran_5|Aldedh	AEO58343.1	746	Glyco_hydro_3|Glyco_hydro_3_C|Fn3-like	Myceliophthora thermophila ATCC 42464	GH3	NO	NO	3.2.1.21
comp9579_c0_seq13 len=5314 path=[5289:0-1248 6596:1249-1597 11522:1598-1606 7019:1607-1640 7053:1641-1723 11063:1724-1772 11112:1773-1849 7136:1850-1856 7143:1857-2158 7445:2159-2217 7504:2218-3649 8936:3650-5313]	5314	Peptidase_C2|Glyco_hydro_3	XP_365193.1	635	Glyco_hydro_3	Magnaporthe grisea 70-15	GH3	NO	NO		G4N9A6
comp634448_c0_seq1 len=314 path=[1:0-313]	314	Glyco_hydro_3_C	BAE64689.1	835	Glyco_hydro_3|Glyco_hydro_3_C	Aspergillus oryzae RIB40	GH3	NO	NO		Q2U176
comp8446_c0_seq3 len=4689 path=[14375:0-82 14459:83-102 14346:103-106 9845:107-2406 12145:2407-3550 14742:3551-3663 13289:3664-4688]	4689	zf-C2HC5|Fn3-like|Glyco_hydro_3_C|Glyco_hydro_3	AEO58343.1	746	Glyco_hydro_3|Glyco_hydro_3_C|Fn3-like	Myceliophthora thermophila ATCC 42464	GH3	NO	NO	3.2.1.21
comp8446_c0_seq2 len=7151 path=[7163:0-2681 9845:2682-4981 12145:4982-6125 13289:6126-7150]	7151	Lyase_1|ADSL_C|zf-C2HC5|Fn3-like|Glyco_hydro_3_C|Glyco_hydro_3	AEO58343.1	746	Glyco_hydro_3|Glyco_hydro_3_C|Fn3-like	Myceliophthora thermophila ATCC 42464	GH3	NO	NO	3.2.1.21
comp9208_c0_seq2 len=3356 path=[3391:0-727 4175:728-1127 4576:1128-1305 4754:1306-1388 4837:1389-1393 4842:1394-2806 6255:2807-3355]	3356	Glyco_hydro_3|Glyco_hydro_3|Glyco_hydro_3_C|Fn3-like	AEO63458.1	705	Glyco_hydro_3|Glyco_hydro_3_C|Fn3-like	Thielavia terrestris NRRL 8126	GH3	NO	NO
comp3872_c0_seq1 len=3166 path=[1:0-1537 1539:1538-3165]	3166	SKI|AAA_33	ACL38786.1	772	Glyco_hydro_3	Arthrobacter chlorophenolicus A6	GH3	NO	NO		B8HCK3
comp5571_c0_seq2 len=1239 path=[1:0-538 540:539-595 597:596-1238]	1239	Glyco_hydro_3	ABQ05073.1	899	Glyco_hydro_3|Glyco_hydro_3_C|PA14|Fn3-like	Flavobacterium johnsoniae UW101	GH3	NO	NO		A5FI94
comp6459_c0_seq1 len=1743 path=[1:0-388 390:389-1171 1173:1172-1742]	1743	MFS_1	BAE65591.1	810	Glyco_hydro_3|Glyco_hydro_3_C	Aspergillus oryzae RIB40	GH3	NO	NO		Q2TYT2
comp7405_c0_seq1 len=3708 path=[3686:0-612 4299:613-3707]	3708	Glyco_hydro_3	AEO58968.1	940	Glyco_hydro_3	Myceliophthora thermophila ATCC 42464	GH3	YES	NO
comp9579_c0_seq2 len=5437 path=[5289:0-1248 6538:1249-1306 6596:1307-1655 6945:1656-1720 11522:1721-1729 7019:1730-1763 7053:1764-1846 11063:1847-1895 11112:1896-1972 7136:1973-1979 7143:1980-2281 7445:2282-2340 7504:2341-3772 8936:3773-5436]	5437	Peptidase_C2|Glyco_hydro_3	XP_365193.1	635	Glyco_hydro_3	Magnaporthe grisea 70-15	GH3	NO	NO		G4N9A6
comp114526_c0_seq1 len=270 path=[1:0-269]	270	Glyco_hydro_3_C	ABU57034.1	927	Glyco_hydro_3|Glyco_hydro_3_C|PA14|Fn3-like	Roseiflexus castenholzii DSM 13941	GH3	NO	NO		A7NHT7
comp6151_c0_seq1 len=3187 path=[1:0-3186]	3187	Fn3-like|Glyco_hydro_3_C|Glyco_hydro_3	AEO69052.1	886	Glyco_hydro_3|Glyco_hydro_3_C	Thielavia terrestris NRRL 8126	GH3	NO	NO
comp9579_c0_seq7 len=5313 path=[5289:0-1248 6538:1249-1306 6596:1307-1655 11522:1656-1664 7019:1665-1698 7053:1699-1781 11063:1782-1830 11112:1831-1907 7136:1908-1914 7143:1915-2216 7504:2217-3648 8936:3649-5312]	5313	Peptidase_C2|Glyco_hydro_3	XP_365193.1	635	Glyco_hydro_3	Magnaporthe grisea 70-15	GH3	NO	NO		G4N9A6
comp6619_c0_seq1 len=1960 path=[1938:0-1959]	1960	Sulfatase|Sulfatase	BAE60251.1	1220	Sulfatase|Glyco_hydro_3|Glyco_hydro_3_C|Fn3-like	Aspergillus oryzae RIB40	GH3	NO	NO		Q2UDW4
comp391254_c0_seq1 len=247 path=[1:0-246]	247	Glyco_hydro_3	BAE61700.1	865	Glyco_hydro_3|Glyco_hydro_3_C|Fn3-like	Aspergillus oryzae RIB40	GH3	NO	NO		Q2U9R5
comp56206_c0_seq1 len=933 path=[911:0-932]	933	Glyco_hydro_3	BAE62494.1	777	Glyco_hydro_3|Glyco_hydro_3_C|Fn3-like	Aspergillus oryzae RIB40	GH3	NO	YES		Q2U7H1
comp71778_c0_seq1 len=1327 path=[1:0-1326]	1327	Beta-lactamase	AEN73852.1	981	Glyco_hydro_3|Glyco_hydro_3_C|Beta-lactamase	Rhodothermus marinus SG0.5JP17-172	GH3	NO	NO
comp71778_c0_seq1 len=1327 path=[1:0-1326]	1327	Beta-lactamase	ACY47819.1	979	Glyco_hydro_3|Glyco_hydro_3_C|Beta-lactamase	Rhodothermus marinus DSM 4252	GH3	NO	NO		D0MH34
comp11979_c0_seq1 len=3687 path=[3665:0-3686]	3687	Fn3-like|Glyco_hydro_3_C|Glyco_hydro_3	CAP65606.1	987	Glyco_hydro_3|Glyco_hydro_3_C|Fn3-like	Podospora anserina S mat+	GH3	NO	NO		B2ANM6
comp6709_c0_seq1 len=3288 path=[1:0-725 727:726-960 962:961-3287]	3288	Fn3-like	AEO64446.1	806	Glyco_hydro_3|Glyco_hydro_3_C|Fn3-like	Thielavia terrestris NRRL 8126	GH3	NO	NO
comp6636_c0_seq1 len=4882 path=[1:0-2971 9679:2972-3057 2973:3058-4206 4122:4207-4881]	4882	Beta-lactamase	CBH23370.1	992	Glyco_hydro_3|Beta-lactamase	Salinibacter ruber M8	GH3	NO	NO
comp6636_c0_seq1 len=4882 path=[1:0-2971 9679:2972-3057 2973:3058-4206 4122:4207-4881]	4882	Beta-lactamase	ABC45027.1	992	Glyco_hydro_3|Beta-lactamase	Salinibacter ruber DSM 13855 M31	GH3	NO	NO		Q2S5L3
comp9208_c0_seq3 len=1440 path=[3391:0-727 4175:728-1127 4576:1128-1305 6920:1306-1356 4754:1357-1439]	1440	Glyco_hydro_3|Glyco_hydro_3	XP_363958.1	789	Glyco_hydro_3|Glyco_hydro_3_C|Fn3-like	Magnaporthe grisea 70-15	GH3	NO	NO
comp3037_c0_seq1 len=4151 path=[1:0-4150]	4151	Glyco_hydro_3|Glyco_hydro_3_C|PA14|Glyco_hydro_3_C|Fn3-like	AEO53892.1	897	Glyco_hydro_3|Glyco_hydro_3_C|PA14|Fn3-like	Myceliophthora thermophila ATCC 42464	GH3	NO	NO
comp161569_c0_seq1 len=450 path=[1:0-449]	450	Glyco_hydro_3	CCD48322.1	785	Glyco_hydro_3|Glyco_hydro_3_C	Botryotinia fuckeliana	GH3	NO	NO
comp5571_c0_seq1 len=1182 path=[1:0-538 597:539-1181]	1182	Glyco_hydro_3	ABQ05073.1	899	Glyco_hydro_3|Glyco_hydro_3_C|PA14|Fn3-like	Flavobacterium johnsoniae UW101	GH3	NO	NO		A5FI94
comp29480_c0_seq1 len=1627 path=[1:0-1626]	1627	Beta-lactamase	AEN73852.1	981	Glyco_hydro_3|Glyco_hydro_3_C|Beta-lactamase	Rhodothermus marinus SG0.5JP17-172	GH3	NO	NO
comp29480_c0_seq1 len=1627 path=[1:0-1626]	1627	Beta-lactamase	ACY47819.1	979	Glyco_hydro_3|Glyco_hydro_3_C|Beta-lactamase	Rhodothermus marinus DSM 4252	GH3	NO	NO		D0MH34
comp9271_c0_seq1 len=3134 path=[11029:0-19 2149:20-1899 4273:1900-3133]	3134	n/a	AEO64229.1	968	Glyco_hydro_3	Thielavia terrestris NRRL 8126	GH3	n/a	NO
comp9579_c0_seq8 len=3908 path=[5289:0-1248 6538:1249-1306 6596:1307-1655 6945:1656-1720 11522:1721-1729 10600:1730-1864 7019:1865-1898 7053:1899-1981 11063:1982-2030 11112:2031-2107 7136:2108-2114 7143:2115-2416 7445:2417-2475 7504:2476-3907]	3908	Peptidase_C2|Glyco_hydro_3	BAE59617.1	669	Glyco_hydro_3	Aspergillus oryzae RIB40	GH3	NO	NO		Q2UFP8
comp9579_c0_seq14 len=5455 path=[5289:0-1248 6596:1249-1597 6945:1598-1662 11522:1663-1671 10600:1672-1806 7019:1807-1840 7053:1841-1923 11063:1924-1972 11112:1973-2049 7136:2050-2056 7143:2057-2358 7504:2359-3790 8936:3791-5454]	5455	Peptidase_C2|Glyco_hydro_3	XP_365193.1	635	Glyco_hydro_3	Magnaporthe grisea 70-15	GH3	NO	NO		G4N9A6
comp8446_c0_seq4 len=4576 path=[14375:0-82 14459:83-102 14346:103-106 9845:107-2406 12145:2407-3550 13289:3551-4575]	4576	zf-C2HC5|Fn3-like|Glyco_hydro_3_C|Glyco_hydro_3	AEO58343.1	746	Glyco_hydro_3|Glyco_hydro_3_C|Fn3-like	Myceliophthora thermophila ATCC 42464	GH3	NO	NO	3.2.1.21
comp9579_c0_seq1 len=5514 path=[5289:0-1248 6596:1249-1597 6945:1598-1662 11522:1663-1671 10600:1672-1806 7019:1807-1840 7053:1841-1923 11063:1924-1972 11112:1973-2049 7136:2050-2056 7143:2057-2358 7445:2359-2417 7504:2418-3849 8936:3850-5513]	5514	Peptidase_C2|Glyco_hydro_3	XP_365193.1	635	Glyco_hydro_3	Magnaporthe grisea 70-15	GH3	NO	NO		G4N9A6
comp7405_c0_seq2 len=3794 path=[3686:0-612 7503:613-698 4299:699-3793]	3794	Glyco_hydro_3	AEO58968.1	940	Glyco_hydro_3	Myceliophthora thermophila ATCC 42464	GH3	YES	NO
comp9579_c0_seq6 len=5379 path=[5289:0-1248 6596:1249-1597 6945:1598-1662 11522:1663-1671 7019:1672-1705 7053:1706-1788 11063:1789-1837 11112:1838-1914 7136:1915-1921 7143:1922-2223 7445:2224-2282 7504:2283-3714 8936:3715-5378]	5379	Peptidase_C2|Glyco_hydro_3	XP_365193.1	635	Glyco_hydro_3	Magnaporthe grisea 70-15	GH3	NO	NO		G4N9A6
comp6636_c0_seq2 len=4796 path=[1:0-2971 2973:2972-4120 4122:4121-4795]	4796	Beta-lactamase	CBH23370.1	992	Glyco_hydro_3|Beta-lactamase	Salinibacter ruber M8	GH3	NO	NO
comp6636_c0_seq2 len=4796 path=[1:0-2971 2973:2972-4120 4122:4121-4795]	4796	Beta-lactamase	ABC45027.1	992	Glyco_hydro_3|Beta-lactamase	Salinibacter ruber DSM 13855 M31	GH3	NO	NO		Q2S5L3
comp9579_c0_seq10 len=5378 path=[5289:0-1248 6538:1249-1306 6596:1307-1655 6945:1656-1720 11522:1721-1729 7019:1730-1763 7053:1764-1846 11063:1847-1895 11112:1896-1972 7136:1973-1979 7143:1980-2281 7504:2282-3713 8936:3714-5377]	5378	Peptidase_C2|Glyco_hydro_3	XP_365193.1	635	Glyco_hydro_3	Magnaporthe grisea 70-15	GH3	NO	NO		G4N9A6
comp13518_c0_seq1 len=2598 path=[1:0-2597]	2598	Glyco_hydro_3_C|PA14|Glyco_hydro_3_C|Glyco_hydro_3	XP_362540.1	849	Glyco_hydro_3|Glyco_hydro_3_C|PA14|Fn3-like	Magnaporthe grisea 70-15	GH3	NO	NO
comp8453_c0_seq2 len=1385 path=[19955:0-73 18593:74-370 18890:371-1384]	1385	Glyco_hydro_3	CCD56845.1	790	Glyco_hydro_3|Glyco_hydro_3_C|Fn3-like	Botryotinia fuckeliana	GH3	NO	NO
comp8313_c0_seq1 len=1572 path=[1491:0-136 3189:137-195 1628:196-1164 2597:1165-1571]	1572	Beta-lactamase	AEN73852.1	981	Glyco_hydro_3|Glyco_hydro_3_C|Beta-lactamase	Rhodothermus marinus SG0.5JP17-172	GH3	NO	NO
comp8313_c0_seq1 len=1572 path=[1491:0-136 3189:137-195 1628:196-1164 2597:1165-1571]	1572	Beta-lactamase	ACY47819.1	979	Glyco_hydro_3|Glyco_hydro_3_C|Beta-lactamase	Rhodothermus marinus DSM 4252	GH3	NO	NO		D0MH34
comp46240_c0_seq1 len=1542 path=[1520:0-1541]	1542	Glyco_hydro_3_C|Fn3-like	NP_810693.1	964	Glyco_hydro_3|Glyco_hydro_3_C|Fn3-like	Bacteroides thetaiotaomicron VPI-5482	GH3	NO	NO		Q8A6U6
comp9579_c0_seq5 len=5320 path=[5289:0-1248 6596:1249-1597 6945:1598-1662 11522:1663-1671 7019:1672-1705 7053:1706-1788 11063:1789-1837 11112:1838-1914 7136:1915-1921 7143:1922-2223 7504:2224-3655 8936:3656-5319]	5320	Peptidase_C2|Glyco_hydro_3	XP_365193.1	635	Glyco_hydro_3	Magnaporthe grisea 70-15	GH3	NO	NO		G4N9A6
comp12850_c0_seq1 len=2692 path=[1:0-2691]	2692	Glyco_hydro_3|Glyco_hydro_3_C|Fn3-like	XP_363958.1	789	Glyco_hydro_3|Glyco_hydro_3_C|Fn3-like	Magnaporthe grisea 70-15	GH3	YES	NO
comp4703_c0_seq1 len=2531 path=[2509:0-2530]	2531	n/a	CCD48322.1	785	Glyco_hydro_3|Glyco_hydro_3_C	Botryotinia fuckeliana	GH3	n/a	NO
comp8677_c0_seq2 len=3130 path=[8955:0-66 339:67-1580 1853:1581-1681 1954:1682-3129]	3130	n/a	AEO71227.1	NA	n/a	Thielavia terrestris NRRL 8126	GH30	n/a	n/a
comp9350_c0_seq1 len=7390 path=[1:0-1942 1944:1943-2041 2043:2042-2420 14865:2421-2522 2422:2523-6318 6317:6319-7165 7164:7166-7389]	7390	NAD_kinase|Cyanate_lyase	CBX92400.1	NA	n/a	Leptosphaeria maculans v23.1.3	GH30	n/a	n/a		E4ZM51
comp9350_c0_seq4 len=7288 path=[1:0-1942 1944:1943-2041 2043:2042-2420 2422:2421-6216 6317:6217-7063 7164:7064-7287]	7288	NAD_kinase|Cyanate_lyase	CBX92400.1	NA	n/a	Leptosphaeria maculans v23.1.3	GH30	n/a	n/a		E4ZM51
comp7990_c0_seq2 len=2246 path=[1:0-888 890:889-1129 1131:1130-1405 1407:1406-2245]	2246	n/a	BAC84995.1	NA	n/a	Hypocrea rufa	GH30	n/a	n/a	3.2.1.164	Q76FP5
comp9207_c0_seq1 len=9055 path=[1:0-5023 5025:5024-9054]	9055	Sec6|Clat_adaptor_s	AEO57693.1	484	Glyco_hydro_30	Myceliophthora thermophila ATCC 42464	GH30	NO	NO
comp9350_c0_seq2 len=7387 path=[1:0-1942 1944:1943-2041 2043:2042-2420 2422:2421-6216 6218:6217-6315 6317:6316-7162 7164:7163-7386]	7387	NAD_kinase|Cyanate_lyase	CBX92400.1	NA	n/a	Leptosphaeria maculans v23.1.3	GH30	n/a	n/a		E4ZM51
comp4917_c0_seq1 len=3178 path=[3156:0-3177]	3178	n/a	XP_365424.1	1054	Glyco_hydro_30	Magnaporthe grisea 70-15	GH30	n/a	NO		G4MNS2
comp56480_c0_seq1 len=1141 path=[1:0-1140]	1141	n/a	XP_365424.1	1054	Glyco_hydro_30	Magnaporthe grisea 70-15	GH30	n/a	YES		G4MNS2
comp8677_c0_seq1 len=3401 path=[1:0-337 339:338-1851 1853:1852-1952 1954:1953-3400]	3401	Glyco_hydro_30	AEO71227.1	NA	n/a	Thielavia terrestris NRRL 8126	GH30	n/a	n/a
comp7705_c0_seq1 len=2653 path=[1:0-1954 1956:1955-1971 1973:1972-2652]	2653	Glyco_hydro_30	AEO68216.1	494	Glyco_hydro_30	Thielavia terrestris NRRL 8126	GH30	YES	NO
comp9207_c0_seq2 len=9110 path=[1:0-5023 18088:5024-5078 5025:5079-9109]	9110	Sec6|Clat_adaptor_s	AEO57693.1	484	Glyco_hydro_30	Myceliophthora thermophila ATCC 42464	GH30	NO	NO
comp7990_c0_seq1 len=2331 path=[1:0-888 890:889-1129 4467:1130-1214 1131:1215-1490 1407:1491-2330]	2331	n/a	CAP64775.1	500	Glyco_hydr_30_2	Podospora anserina S mat+	GH30	n/a	NO		B2ALC8
comp16325_c0_seq1 len=2196 path=[1:0-2195]	2196	n/a	XP_365424.1	1054	Glyco_hydro_30	Magnaporthe grisea 70-15	GH30	n/a	NO		G4MNS2
comp9350_c0_seq3 len=7489 path=[1:0-1942 1944:1943-2041 2043:2042-2420 14865:2421-2522 2422:2523-6318 6218:6319-6417 6317:6418-7264 7164:7265-7488]	7489	NAD_kinase|Cyanate_lyase	CBX92400.1	NA	n/a	Leptosphaeria maculans v23.1.3	GH30	n/a	n/a		E4ZM51
comp8618_c0_seq1 len=3497 path=[4399:0-656 5056:657-1610 6010:1611-3421 7821:3422-3496]	3497	n/a	CBX92400.1	NA	n/a	Leptosphaeria maculans v23.1.3	GH30	n/a	n/a		E4ZM51
comp9506_c1_seq3 len=3740 path=[4199:0-191 4391:192-360 4560:361-363 8766:364-1058 5258:1059-1112 5312:1113-1815 6015:1816-3739]	3740	Gal_mutarotas_2|Glyco_hydro_31	BAE58852.1	860	Glyco_hydro_31	Aspergillus oryzae RIB40	GH31	NO	NO		Q2UHW3
comp9506_c1_seq3 len=3740 path=[4199:0-191 4391:192-360 4560:361-363 8766:364-1058 5258:1059-1112 5312:1113-1815 6015:1816-3739]	3740	Gal_mutarotas_2|Glyco_hydro_31	CAK97480.1	860	Glyco_hydro_31	Aspergillus niger CBS 513.88	GH31	NO	NO		A2RB60
comp2651_c0_seq1 len=4420 path=[4398:0-411 4810:412-4419]	4420	Glyco_hydro_31|Glyco_hydro_31	CCD50290.1	1010	Glyco_hydro_31	Botryotinia fuckeliana	GH31	NO	NO
comp264724_c0_seq1 len=219 path=[197:0-218]	219	n/a	CAP86287.1	994	Glyco_hydro_31	Penicillium chrysogenum Wisconsin 54-1255	GH31	n/a	NO		B6HFB6
comp409290_c0_seq1 len=230 path=[1:0-229]	230	Glyco_hydro_31	XP_365394.1	839	Glyco_hydro_31	Magnaporthe grisea 70-15	GH31	YES	NO
comp6420_c0_seq1 len=1763 path=[1804:0-1417 3285:1418-1762]	1763	Glyco_hydro_31	BAE59606.1	1039	Glyco_hydro_31	Aspergillus oryzae RIB40	GH31	YES	NO		Q2UFQ9
comp91165_c0_seq1 len=254 path=[1:0-253]	254	n/a	CCD50290.1	1010	Glyco_hydro_31	Botryotinia fuckeliana	GH31	n/a	NO
comp6420_c0_seq2 len=1826 path=[1804:0-1417 3222:1418-1480 3285:1481-1825]	1826	Glyco_hydro_31	BAE59606.1	1039	Glyco_hydro_31	Aspergillus oryzae RIB40	GH31	YES	NO		Q2UFQ9
comp6966_c0_seq1 len=3381 path=[1:0-3380]	3381	Gal_mutarotas_2|Glyco_hydro_31|Glyco_hydro_31	ACB13188.1	913	Glyco_hydro_31	Thermomyces lanuginosus	GH31	NO	NO		B1Q1F4
comp55857_c0_seq1 len=1210 path=[1188:0-1209]	1210	Glyco_hydro_31	XP_365394.1	839	Glyco_hydro_31	Magnaporthe grisea 70-15	GH31	YES	NO
comp41536_c0_seq1 len=2190 path=[1:0-2189]	2190	Glyco_hydro_31	CBX99019.1	673	Glyco_hydro_31	Leptosphaeria maculans v23.1.3	GH31	YES	NO		E5A5X4
comp9506_c1_seq1 len=3571 path=[4199:0-191 4560:192-194 8766:195-889 5258:890-943 5312:944-1646 6015:1647-3570]	3571	Gal_mutarotas_2|Glyco_hydro_31	BAE58852.1	860	Glyco_hydro_31	Aspergillus oryzae RIB40	GH31	NO	NO		Q2UHW3
comp9506_c1_seq1 len=3571 path=[4199:0-191 4560:192-194 8766:195-889 5258:890-943 5312:944-1646 6015:1647-3570]	3571	Gal_mutarotas_2|Glyco_hydro_31	CAK97480.1	860	Glyco_hydro_31	Aspergillus niger CBS 513.88	GH31	NO	NO		A2RB60
comp136956_c0_seq1 len=235 path=[213:0-234]	235	n/a	CAE76419.1	1057	Glyco_hydro_31	Neurospora crassa OR74A	GH31	n/a	NO		Q7SHN5
comp9881_c0_seq1 len=3303 path=[3281:0-3302]	3303	Telomere_Sde2|COX6B|RRM_1	ADY40986.1	1142	Glyco_hydro_31	Ascaris suum	GH31	NO	NO
comp3470_c0_seq1 len=3543 path=[1:0-3190 3192:3191-3542]	3543	Glyco_hydro_31|Gal_mutarotas_2	AEO62724.1	1005	Gal_mutarotas_2|Glyco_hydro_31	Thielavia terrestris NRRL 8126	GH31	NO	NO
comp9318_c0_seq2 len=6124 path=[1:0-2253 2255:2254-3268 3270:3269-3276 3278:3277-5801 5935:5802-6123]	6124	Gal_mutarotas_2|Glyco_hydro_31|Ceramidase_alk	CCD56846.1	779	Gal_mutarotas_2|Glyco_hydro_31	Botryotinia fuckeliana	GH31	NO	NO
comp9506_c1_seq4 len=3517 path=[4199:0-191 4560:192-194 8766:195-889 5312:890-1592 6015:1593-3516]	3517	Gal_mutarotas_2|Glyco_hydro_31	BAE58852.1	860	Glyco_hydro_31	Aspergillus oryzae RIB40	GH31	NO	NO		Q2UHW3
comp9506_c1_seq4 len=3517 path=[4199:0-191 4560:192-194 8766:195-889 5312:890-1592 6015:1593-3516]	3517	Gal_mutarotas_2|Glyco_hydro_31	CAK97480.1	860	Glyco_hydro_31	Aspergillus niger CBS 513.88	GH31	NO	NO		A2RB60
comp336473_c0_seq1 len=209 path=[1:0-208]	209	Glyco_hydro_31	CCA73687.1	902	Glyco_hydro_31	Piriformospora indica	GH31	YES	NO
comp9506_c1_seq2 len=3686 path=[4199:0-191 4391:192-360 4560:361-363 8766:364-1058 5312:1059-1761 6015:1762-3685]	3686	Gal_mutarotas_2|Glyco_hydro_31	BAE58852.1	860	Glyco_hydro_31	Aspergillus oryzae RIB40	GH31	NO	NO		Q2UHW3
comp9506_c1_seq2 len=3686 path=[4199:0-191 4391:192-360 4560:361-363 8766:364-1058 5312:1059-1761 6015:1762-3685]	3686	Gal_mutarotas_2|Glyco_hydro_31	CAK97480.1	860	Glyco_hydro_31	Aspergillus niger CBS 513.88	GH31	NO	NO		A2RB60
comp8771_c0_seq1 len=11581 path=[11585:0-7216 18802:7217-8468 20054:8469-11580]	11581	Ran_BP1|K_trans|FAD_binding_8|Ferric_reduct	BAE65527.1	1100	Ferric_reduct|Glyco_hydro_32C	Aspergillus oryzae RIB40	GH32	NO	NO		Q2TYZ6
comp2958_c0_seq1 len=3792 path=[3770:0-3791]	3792	FAD_binding_8|Ferric_reduct	BAE65527.1	1100	Ferric_reduct|Glyco_hydro_32C	Aspergillus oryzae RIB40	GH32	NO	NO		Q2TYZ6
comp6250_c1_seq2 len=2531 path=[1816:0-1791 8433:1792-1932 3608:1933-2530]	2531	n/a	CBZ37971.1	1105	Glyco_hydro_32N	Leishmania donovani BPK282A1	GH32	n/a	NO
comp6250_c1_seq2 len=2531 path=[1816:0-1791 8433:1792-1932 3608:1933-2530]	2531	n/a	CBZ37970.1	1105	Glyco_hydro_32N	Leishmania donovani BPK282A1	GH32	n/a	NO
comp6208_c0_seq3 len=2326 path=[2318:0-2035 4864:2036-2036 4369:2037-2325]	2326	Ferric_reduct	BAE65527.1	1100	Ferric_reduct|Glyco_hydro_32C	Aspergillus oryzae RIB40	GH32	NO	NO		Q2TYZ6
comp5988_c0_seq1 len=4121 path=[4099:0-291 4391:292-4120]	4121	Ferric_reduct|FAD_binding_8|NAD_binding_6	BAE65527.1	1100	Ferric_reduct|Glyco_hydro_32C	Aspergillus oryzae RIB40	GH32	NO	NO		Q2TYZ6
comp3650_c0_seq1 len=4378 path=[4419:0-1037 5520:1038-4377]	4378	Ferric_reduct|FAD_binding_8|NAD_binding_6	BAE65527.1	1100	Ferric_reduct|Glyco_hydro_32C	Aspergillus oryzae RIB40	GH32	NO	NO		Q2TYZ6
comp10493_c0_seq1 len=2893 path=[2871:0-2892]	2893	Ferric_reduct|FAD_binding_8|NAD_binding_6	BAE65527.1	1100	Ferric_reduct|Glyco_hydro_32C	Aspergillus oryzae RIB40	GH32	NO	NO		Q2TYZ6
comp6208_c0_seq2 len=2340 path=[2318:0-2035 4850:2036-2049 4864:2050-2050 4369:2051-2339]	2340	Ferric_reduct	BAE65527.1	1100	Ferric_reduct|Glyco_hydro_32C	Aspergillus oryzae RIB40	GH32	NO	NO		Q2TYZ6
comp8059_c0_seq1 len=4216 path=[4194:0-3944 8139:3945-4215]	4216	Fungal_trans|Glyco_hydro_32N	CAP80067.1	637	Glyco_hydro_32N	Penicillium chrysogenum Wisconsin 54-1255	GH32	NO	NO		B6GXW3
comp10753_c0_seq1 len=2422 path=[1:0-2421]	2422	Glyco_hydro_32N	CCD50866.1	572	Glyco_hydro_32N	Botryotinia fuckeliana	GH32	YES	NO
comp2448_c0_seq1 len=1896 path=[2357:0-1861 4219:1862-1895]	1896	Glyco_hydro_32N	CAP80067.1	637	Glyco_hydro_32N	Penicillium chrysogenum Wisconsin 54-1255	GH32	YES	NO		B6GXW3
comp6311_c0_seq1 len=3537 path=[7655:0-113 4141:114-217 4245:218-3536]	3537	PfkB	ACX64846.1	834	PfkB|Glyco_hydro_32N	Paenibacillus sp. Y412MC10	GH32	NO	NO		D3EAV7
comp3650_c0_seq2 len=4441 path=[4419:0-1037 5457:1038-1100 5520:1101-4440]	4441	Ferric_reduct|FAD_binding_8|NAD_binding_6	BAE65527.1	1100	Ferric_reduct|Glyco_hydro_32C	Aspergillus oryzae RIB40	GH32	NO	NO		Q2TYZ6
comp6208_c0_seq1 len=2394 path=[2318:0-2035 4850:2036-2049 4864:2050-2050 4733:2051-2104 4369:2105-2393]	2394	Ferric_reduct	BAE65527.1	1100	Ferric_reduct|Glyco_hydro_32C	Aspergillus oryzae RIB40	GH32	NO	NO		Q2TYZ6
comp6250_c1_seq1 len=2390 path=[1816:0-1791 3608:1792-2389]	2390	n/a	CBZ37971.1	1105	Glyco_hydro_32N	Leishmania donovani BPK282A1	GH32	n/a	NO
comp6250_c1_seq1 len=2390 path=[1816:0-1791 3608:1792-2389]	2390	n/a	CBZ37970.1	1105	Glyco_hydro_32N	Leishmania donovani BPK282A1	GH32	n/a	NO
comp6311_c0_seq2 len=3793 path=[3771:0-369 4141:370-473 4245:474-3792]	3793	PfkB	ACX64846.1	834	PfkB|Glyco_hydro_32N	Paenibacillus sp. Y412MC10	GH32	NO	NO		D3EAV7
comp8771_c0_seq2 len=11734 path=[11585:0-7216 18802:7217-8468 23368:8469-8621 20054:8622-11733]	11734	Ran_BP1|K_trans|FAD_binding_8|Ferric_reduct	BAE65527.1	1100	Ferric_reduct|Glyco_hydro_32C	Aspergillus oryzae RIB40	GH32	NO	NO		Q2TYZ6
comp10100_c0_seq1 len=2109 path=[2087:0-2108]	2109	DHDPS	CCD02617.1	737	DHDPS|BNR_2	Azospirillum brasilense Sp245	GH33	NO	NO
comp2863_c0_seq1 len=2223 path=[1:0-2222]	2223	DHDPS	CCD02617.1	737	DHDPS|BNR_2	Azospirillum brasilense Sp245	GH33	NO	NO
comp1997_c0_seq1 len=1325 path=[1303:0-1324]	1325	DHDPS	CCD02617.1	737	DHDPS|BNR_2	Azospirillum brasilense Sp245	GH33	NO	NO
comp22755_c0_seq1 len=1428 path=[1:0-1427]	1428	BNR_2	BAE55299.1	477	BNR_2	Aspergillus oryzae RIB40	GH33	YES	NO		Q2UT16
comp5762_c0_seq2 len=6520 path=[1:0-5353 5355:5354-6017 6135:6018-6519]	6520	DHDPS|GSHPx	CCD02617.1	737	DHDPS|BNR_2	Azospirillum brasilense Sp245	GH33	NO	NO
comp5762_c0_seq4 len=6636 path=[1:0-5353 5355:5354-6017 6019:6018-6133 6135:6134-6635]	6636	DHDPS|GSHPx	CCD02617.1	737	DHDPS|BNR_2	Azospirillum brasilense Sp245	GH33	NO	NO
comp11558_c0_seq1 len=3048 path=[3026:0-3047]	3048	2OG-FeII_Oxy_3|DHDPS	CCD02617.1	737	DHDPS|BNR_2	Azospirillum brasilense Sp245	GH33	NO	NO
comp12489_c0_seq1 len=5567 path=[5545:0-5566]	5567	SMC_N|AAA_23|Cast|SMC_hinge|MAD|Myosin_tail_1|AAA_13|DUF827|DUF4200|Tropomyosin|DUF3584|Myosin_tail_1	ADH91794.1	898	BNR_2	Arcanobacterium haemolyticum DSM 20595	GH33	NO	NO		D7BLJ5
comp5815_c0_seq1 len=3281 path=[3259:0-2719 5979:2720-3280]	3281	PRP1_N	AEE86952.1	1065	Glyco_hydro_35|Gal_Lectin|PRP1_N	Arabidopsis thaliana	GH35	NO	NO		Q9SCU8
comp5815_c0_seq1 len=3281 path=[3259:0-2719 5979:2720-3280]	3281	PRP1_N	AEE86951.1	1001	Glyco_hydro_35|Gal_Lectin|PRP1_N	Arabidopsis thaliana	GH35	NO	NO		Q9SCU8
comp6857_c0_seq1 len=1163 path=[1:0-272 274:273-333 335:334-497 499:498-591 593:592-1162]	1163	BetaGal_dom2	CCD45102.1	1017	Glyco_hydro_35|BetaGal_dom2|BetaGal_dom3|BetaGal_dom4_5|BetaGal_dom4_5	Botryotinia fuckeliana	GH35	NO	YES
comp7215_c0_seq2 len=1667 path=[1:0-1643 4411:1644-1666]	1667	BetaGal_dom4_5|BetaGal_dom4_5	CAK48192.1	1022	Glyco_hydro_35|BetaGal_dom2|BetaGal_dom3|BetaGal_dom4_5|BetaGal_dom4_5	Aspergillus niger CBS 513.88	GH35	NO	NO		A2QN51
comp6857_c0_seq2 len=1102 path=[1:0-272 335:273-436 499:437-530 593:531-1101]	1102	Glyco_hydro_35|BetaGal_dom2	CCD45102.1	1017	Glyco_hydro_35|BetaGal_dom2|BetaGal_dom3|BetaGal_dom4_5|BetaGal_dom4_5	Botryotinia fuckeliana	GH35	NO	YES
comp1198_c0_seq1 len=276 path=[534:0-275]	276	Glyco_hydro_35	AAL32052.2	1021	Glyco_hydro_35|BetaGal_dom2|BetaGal_dom3|BetaGal_dom4_5|BetaGal_dom4_5	Rasamsonia emersonii	GH35	NO	NO	3.2.1.23	Q8X213
comp7215_c0_seq1 len=2182 path=[1:0-1643 1645:1644-2181]	2182	BetaGal_dom4_5|BetaGal_dom4_5	CAK48192.1	1022	Glyco_hydro_35|BetaGal_dom2|BetaGal_dom3|BetaGal_dom4_5|BetaGal_dom4_5	Aspergillus niger CBS 513.88	GH35	NO	NO		A2QN51
comp6857_c0_seq3 len=1008 path=[1:0-272 335:273-436 593:437-1007]	1008	Glyco_hydro_35|BetaGal_dom2	CCD45102.1	1017	Glyco_hydro_35|BetaGal_dom2|BetaGal_dom3|BetaGal_dom4_5|BetaGal_dom4_5	Botryotinia fuckeliana	GH35	NO	YES
comp142258_c0_seq1 len=266 path=[1:0-265]	266	n/a	ABK58683.1	399	Glyco_hydro_35	Streptomyces fradiae MEN-MYCO-93-63	GH35	n/a	NO		A0T1J3
comp2366_c0_seq1 len=8632 path=[8610:0-8631]	8632	HPIH|HMG-CoA_red|Abhydrolase_6|Abhydrolase_1|BetaGal_dom4_5|BetaGal_dom4_5|BetaGal_dom3|BetaGal_dom2|Glyco_hydro_35	AEO66390.1	1005	Glyco_hydro_35|BetaGal_dom2|BetaGal_dom3|BetaGal_dom4_5|BetaGal_dom4_5	Thielavia terrestris NRRL 8126	GH35	NO	NO
comp162917_c0_seq1 len=332 path=[310:0-331]	332	n/a	ADU14364.1	626	Glyco_hydro_35	Asticcacaulis excentricus CB 48 CS 48	GH35	n/a	NO		C5SHN4
comp341961_c0_seq1 len=321 path=[1:0-320]	321	Glyco_hydro_35	CCD45102.1	1017	Glyco_hydro_35|BetaGal_dom2|BetaGal_dom3|BetaGal_dom4_5|BetaGal_dom4_5	Botryotinia fuckeliana	GH35	NO	NO
comp6857_c0_seq4 len=1069 path=[1:0-272 274:273-333 335:334-497 593:498-1068]	1069	BetaGal_dom2	CCD45102.1	1017	Glyco_hydro_35|BetaGal_dom2|BetaGal_dom3|BetaGal_dom4_5|BetaGal_dom4_5	Botryotinia fuckeliana	GH35	NO	YES
comp254926_c0_seq1 len=226 path=[204:0-225]	226	n/a	ACO31564.1	677	Glyco_hydro_35	Acidobacterium capsulatum ATCC 51196	GH35	n/a	NO		C1F148
comp255174_c0_seq1 len=467 path=[445:0-466]	467	Melibiase	BAE64621.1	733	Melibiase	Aspergillus oryzae RIB40	GH36	YES	NO		Q2U1E4
comp8604_c0_seq2 len=3174 path=[1:0-533 535:534-3122 3186:3123-3173]	3174	Raffinose_syn	CCD49118.1	921	Raffinose_syn	Botryotinia fuckeliana	GH36	YES	NO
comp201583_c0_seq1 len=566 path=[1:0-565]	566	Melibiase	ACN38386.1	761	Melibiase	Penicillium janczewskii zalesk	GH36	YES	NO	3.2.1.22	C0L3L3
comp201583_c0_seq1 len=566 path=[1:0-565]	566	Melibiase	ACN38387.1	761	Melibiase	Penicillium janczewskii zalesk	GH36	YES	NO	3.2.1.22	C0L3L3
comp335223_c0_seq1 len=331 path=[1:0-330]	331	n/a	BAE64621.1	733	Melibiase	Aspergillus oryzae RIB40	GH36	n/a	NO		Q2U1E4
comp8604_c0_seq4 len=3236 path=[1:0-533 535:534-3122 3124:3123-3184 3186:3185-3235]	3236	Raffinose_syn	CCD49118.1	921	Raffinose_syn	Botryotinia fuckeliana	GH36	YES	NO
comp255023_c0_seq1 len=296 path=[274:0-295]	296	n/a	BAE64621.1	733	Melibiase	Aspergillus oryzae RIB40	GH36	n/a	NO		Q2U1E4
comp8604_c0_seq1 len=3233 path=[1:0-533 6528:534-592 535:593-3181 3186:3182-3232]	3233	Raffinose_syn	CCD49118.1	921	Raffinose_syn	Botryotinia fuckeliana	GH36	YES	NO
comp134197_c0_seq1 len=430 path=[408:0-429]	430	n/a	CAA93245.1	759	Melibiase	Trichoderma reesei RUTC-30	GH36	n/a	NO	3.2.1.22	Q92457
comp118484_c0_seq1 len=356 path=[334:0-355]	356	n/a	CAB63901.1	760	Melibiase	Aspergillus niger CBS 120.49 / N400	GH36	n/a	NO	3.2.1.22	Q9UUZ4
comp118484_c0_seq1 len=356 path=[334:0-355]	356	n/a	CAK40113.1	610	Melibiase	Aspergillus niger CBS 513.88	GH36	n/a	NO
comp8604_c0_seq3 len=3295 path=[1:0-533 6528:534-592 535:593-3181 3124:3182-3243 3186:3244-3294]	3295	Raffinose_syn	CCD49118.1	921	Raffinose_syn	Botryotinia fuckeliana	GH36	YES	NO
comp82878_c0_seq1 len=961 path=[1:0-960]	961	Melibiase	CAA93245.1	759	Melibiase	Trichoderma reesei RUTC-30	GH36	YES	NO	3.2.1.22	Q92457
comp5421_c0_seq1 len=3475 path=[3453:0-3474]	3475	Trehalase|Trehalase_Ca-bi	XP_364626.1	750	Trehalase_Ca-bi|Trehalase	Magnaporthe grisea 70-15	GH37	NO	NO	3.2.1.28	O42622
comp5421_c0_seq1 len=3475 path=[3453:0-3474]	3475	Trehalase|Trehalase_Ca-bi	AAN46743.1	749	Trehalase_Ca-bi|Trehalase	Magnaporthe grisea GUY11	GH37	NO	NO	3.2.1.28	O42622
comp5421_c0_seq1 len=3475 path=[3453:0-3474]	3475	Trehalase|Trehalase_Ca-bi	AAB88889.1	749	Trehalase_Ca-bi|Trehalase	Magnaporthe grisea 4091-5-8	GH37	NO	NO	3.2.1.28	O42622
comp3095_c0_seq1 len=2325 path=[1:0-1959 1961:1960-2324]	2325	Trehalase	AEO70020.1	708	Trehalase	Thielavia terrestris NRRL 8126	GH37	YES	NO
comp10333_c0_seq1 len=1466 path=[1:0-1465]	1466	GST_C	CCO15451.1	1417	Trehalase	Bathycoccus prasinos RCC 1105	GH37	NO	YES
comp11152_c0_seq1 len=3876 path=[3854:0-3875]	3876	Glyco_hydro_38C|Alpha-mann_mid|Glyco_hydro_38	CCD54911.1	1092	Glyco_hydro_38|Alpha-mann_mid|Glyco_hydro_38C	Botryotinia fuckeliana	GH38	NO	NO
comp956_c0_seq1 len=292 path=[270:0-291]	292	n/a	AEO67095.1	NA	n/a	Thielavia terrestris NRRL 8126	GH39	n/a	n/a
comp168495_c0_seq1 len=210 path=[188:0-209]	210	n/a	CCD43231.1	NA	n/a	Botryotinia fuckeliana	GH39	n/a	n/a
comp287623_c0_seq1 len=315 path=[293:0-314]	315	n/a	AEO67095.1	NA	n/a	Thielavia terrestris NRRL 8126	GH39	n/a	n/a
comp7129_c1_seq2 len=3112 path=[3363:0-3085 6449:3086-3088 10747:3089-3111]	3112	AMP-binding	ACX49739.1	2318	Condensation|AMP-binding|AMP-binding_C|Condensation|HxxPF_rpt|AMP-binding|Glyco_hydro_4|Glyco_hydro_4C	uncultured marine bacterium 1n22	GH4	NO	NO		D2DIQ1
comp6453_c0_seq2 len=3953 path=[1:0-3820 8155:3821-3876 3822:3877-3952]	3953	Condensation|AMP-binding	ACX49739.1	2318	Condensation|AMP-binding|AMP-binding_C|Condensation|HxxPF_rpt|AMP-binding|Glyco_hydro_4|Glyco_hydro_4C	uncultured marine bacterium 1n22	GH4	NO	NO		D2DIQ1
comp2074_c0_seq1 len=5999 path=[5977:0-5998]	5999	AMP-binding|RmlD_sub_bind|NAD_binding_4|adh_short|KR|adh_short_C2|Ank_4|Ank_2|Ank_2	ACX49739.1	2318	Condensation|AMP-binding|AMP-binding_C|Condensation|HxxPF_rpt|AMP-binding|Glyco_hydro_4|Glyco_hydro_4C	uncultured marine bacterium 1n22	GH4	NO	NO		D2DIQ1
comp7951_c0_seq1 len=26234 path=[1:0-22569 22571:22570-26233]	26234	Condensation|AMP-binding|Condensation|Condensation|AMP-binding|PP-binding|Condensation|AMP-binding|Condensation|Condensation|AMP-binding|PP-binding|Condensation|AMP-binding|Condensation|Condensation|AMP-binding|PP-binding|Condensation	ACX49739.1	2318	Condensation|AMP-binding|AMP-binding_C|Condensation|HxxPF_rpt|AMP-binding|Glyco_hydro_4|Glyco_hydro_4C	uncultured marine bacterium 1n22	GH4	NO	NO		D2DIQ1
[truncated: 1,448 more rows]

## Sheet: CAZY_OutputForAmalaysianum
SequenceID	Query-Length	Query-Pfam domains	Subject gi	Subject-Length	Subject-Pfam domains	Organism	CAZy Families	Domain Consistant	Length Consistant	Subject EC	Subject GenBankID	Subject UniProtID
comp8381_c0_seq3 len=2700 path=[2595:0-1347 3943:1348-1514 4110:1515-1579 5208:1580-1662 4175:1663-1663 4176:1664-2699]	2700	adh_short_C2|adh_short	EAA62552.1	1087	Glyco_hydro_92|adh_short_C2	Aspergillus nidulans FGSC A4	GH92	NO	NO		Q5B238
comp2776_c0_seq1 len=3608 path=[1:0-3607]	3608	TPR_11|TPR_11|Apc3	ACF42940.1	1107	TPR_11|Glyco_transf_41|Glyco_transf_41|Methyltransf_23	Pelodictyon phaeoclathratiforme BU-1	GT41	NO	NO		B4SDU9
comp9400_c1_seq1 len=2829 path=[1:0-368 370:369-2828]	2829	n/a	AFT88228.1	475	FAD_binding_4|BBE	Burkholderia phenoliruptrix BR3459a	AA7	n/a	NO
comp5370_c0_seq1 len=1597 path=[1686:0-1568 3431:1569-1571 3258:1572-1596]	1597	n/a	CBY01773.1	NA	n/a	Leptosphaeria maculans v23.1.3	CE16	n/a	n/a		E5AEY4
comp2519_c0_seq1 len=618 path=[1:0-617]	618	Glyco_hydro_47	AEO63078.1	616	Glyco_hydro_47	Thielavia terrestris NRRL 8126	GH47	YES	YES
comp9685_c0_seq6 len=5875 path=[1:0-1638 1640:1639-2025 15605:2026-2082 2027:2083-3580 15521:3581-3642 3525:3643-4143 4026:4144-4296 4243:4297-4694 4744:4695-5874]	5875	n/a	CCA39958.1	1371	Glyco_transf_15|Hira	Pichia pastoris CBS 7435	GT15	n/a	NO
comp7976_c1_seq2 len=6949 path=[3504:0-6895 10505:6896-6948]	6949	Lipase_GDSL_2|Lipase_GDSL	CAP71774.1	295	Lipase_GDSL_2	Podospora anserina S mat+	CE3	NO	NO		B2B3T8
comp9271_c0_seq4 len=5259 path=[1:0-988 993:989-2144 2149:2145-4024 4273:4025-5258]	5259	n/a	AEO64229.1	968	Glyco_hydro_3	Thielavia terrestris NRRL 8126	GH3	n/a	NO
comp7921_c0_seq6 len=4550 path=[1:0-476 478:477-737 739:738-793 795:794-4549]	4550	HisKA|HATPase_c|Response_reg	NP_810096.1	1350	Glyco_tranf_2_3|HisKA|HATPase_c|Response_reg	Bacteroides thetaiotaomicron VPI-5482	GT2	NO	NO		Q8A8I4
comp3684_c0_seq2 len=1308 path=[1286:0-735 2022:736-1307]	1308	Glyco_hydro_11	AFG19439.1	238	Glyco_hydro_11	Pseudallescheria sp. JSM-2	GH11	YES	NO	3.2.1.8
comp9735_c0_seq6 len=3774 path=[3951:0-42 8479:43-93 3994:94-2095 6144:2096-2129 8866:2130-2152 6303:2153-2393 6544:2394-2483 6634:2484-3773]	3774	DEAD|Helicase_C	CAL53384.1	1058	DEAD|Helicase_C|LpxC	Ostreococcus tauri OTTH0595	CE11	NO	NO		Q017M7
comp9627_c0_seq2 len=4782 path=[5747:0-139 5887:140-206 5954:207-1738 11600:1739-1799 7486:1800-1975 12547:1976-2028 7662:2029-3731 9365:3732-4778 10483:4779-4781]	4782	n/a	BAE93687.1	1213	Glyco_hydro_66	Streptococcus criceti E49	GH66	n/a	NO	3.2.1.11	Q1MVS0
comp9627_c0_seq2 len=4782 path=[5747:0-139 5887:140-206 5954:207-1738 11600:1739-1799 7486:1800-1975 12547:1976-2028 7662:2029-3731 9365:3732-4778 10483:4779-4781]	4782	n/a	BAG16274.1	1213	Glyco_hydro_66	Streptococcus criceti ATCC 19642	GH66	n/a	NO	3.2.1.11	A4F2S5B1Q2P0
comp8017_c0_seq1 len=2593 path=[1:0-684 5424:685-697 877:698-823 5501:824-874 1003:875-2592]	2593	Metallophos|PPP5|TPR_11|TPR_11	ABL65857.1	3048	Glyco_transf_41|Glyco_transf_41|TPR_11|Glyco_transf_41|Glyco_transf_41|Glyco_transf_41|Glyco_transf_41|TPR_11|Glyco_transf_41|Glyco_transf_41	Chlorobium phaeobacteroides DSM 266	GT41	NO	YES		A1BHI0
comp6231_c0_seq4 len=3380 path=[3358:0-532 3891:533-2435 5794:2436-3379]	3380	F-box-like	ABC67744.1	661	Nucleotid_trans	Dictyostelium discoideum AX3	GT77	NO	NO	2.4.1.37	Q54RP0
comp8297_c0_seq1 len=2504 path=[2558:0-297 2932:298-1158 3793:1159-2503]	2504	GMC_oxred_C|GMC_oxred_N	ABN82750.1	574	GMC_oxred_N|GMC_oxred_C	Burkholderia pseudomallei 668	AA3	NO	NO
comp8297_c0_seq1 len=2504 path=[2558:0-297 2932:298-1158 3793:1159-2503]	2504	GMC_oxred_C|GMC_oxred_N	ABN02000.1	574	GMC_oxred_N|GMC_oxred_C	Burkholderia mallei NCTC 10229	AA3	NO	NO
comp8297_c0_seq1 len=2504 path=[2558:0-297 2932:298-1158 3793:1159-2503]	2504	GMC_oxred_C|GMC_oxred_N	ABM50132.1	574	GMC_oxred_N|GMC_oxred_C	Burkholderia mallei SAVP1	AA3	NO	NO
comp13124_c0_seq1 len=2393 path=[2371:0-2392]	2393	n/a	EAA32694.1	1497	Glyco_hydro_18|Hce2	Neurospora crassa OR74A	CBM18|GH18	n/a	NO		Q7S8L7
comp6396_c0_seq1 len=3906 path=[3884:0-383 4268:384-3905]	3906	CBM_20|Glyco_hydro_15	AEO64596.1	651	Glyco_hydro_15|CBM_20	Thielavia terrestris NRRL 8126	CBM20|GH15	NO	NO
comp9489_c0_seq1 len=3543 path=[1:0-2733 2735:2734-3216 3218:3217-3441 3535:3442-3542]	3543	peroxidase|DUF1295	CCF45286.1	436	peroxidase	Colletotrichum higginsianum IMI 349063	AA2	NO	NO
comp956_c0_seq1 len=292 path=[270:0-291]	292	n/a	AEO67095.1	NA	n/a	Thielavia terrestris NRRL 8126	GH39	n/a	n/a
comp9680_c0_seq58 len=7462 path=[1:0-2556 2558:2557-2763 15956:2764-2822 2765:2823-3385 3332:3386-3796 3743:3797-3870 3817:3871-5244 5191:5245-5799 16549:5800-5899 5746:5900-7461]	7462	DUF3237	ADE82894.1	1609	Glyco_hydro_28|Glyco_hydro_88	Prevotella ruminicola 23	GH105|GH28	NO	NO		D5ET13
comp9017_c0_seq14 len=6135 path=[5965:0-888 6854:889-1251 12123:1252-1399 7217:1400-2805 8623:2806-5083 10901:5084-5142 10960:5143-5245 11063:5246-6134]	6135	OPT|OPT|GMC_oxred_C	CCA74023.1	627	GMC_oxred_N|GMC_oxred_C	Piriformospora indica	AA3	NO	NO
comp5658_c0_seq1 len=4634 path=[4612:0-625 5238:626-4633]	4634	Endonuclease_NS	ABC67744.1	661	Nucleotid_trans	Dictyostelium discoideum AX3	GT77	NO	NO	2.4.1.37	Q54RP0
comp9680_c0_seq56 len=7417 path=[1:0-2556 2558:2557-2763 2765:2764-3326 17170:3327-3330 15769:3331-3414 3332:3415-3825 3817:3826-5199 5191:5200-5754 16549:5755-5854 5746:5855-7416]	7417	DUF3237	ADE82894.1	1609	Glyco_hydro_28|Glyco_hydro_88	Prevotella ruminicola 23	GH105|GH28	NO	NO		D5ET13
comp9448_c0_seq2 len=10705 path=[1:0-4626 4628:4627-6966 6968:6967-7908 7912:7909-8322 8326:8323-8755 8759:8756-8817 8821:8818-8902 8906:8903-10704]	10705	RRM_5|RRM_6|Pro_isomerase	AFU57543.1	936	STT3|Pro_isomerase	Candidatus Nitrososphaera gargensis Ga9.2	GT66	NO	NO
comp7217_c0_seq2 len=4128 path=[1:0-3541 8159:3542-3633 8511:3634-3636 3546:3637-4127]	4128	n/a	ACL76858.1	425	RicinB_lectin_2	Clostridium cellulolyticum H10 ATCC 35319	CBM13	n/a	NO		B8I693
comp9685_c0_seq26 len=5980 path=[1:0-1638 1640:1639-2025 15605:2026-2082 2027:2083-3580 3525:3581-4081 4026:4082-4234 4179:4235-4298 4243:4299-4696 4641:4697-4756 4701:4757-4799 4744:4800-5979]	5980	n/a	CCA39958.1	1371	Glyco_transf_15|Hira	Pichia pastoris CBS 7435	GT15	n/a	NO
comp7777_c0_seq3 len=4963 path=[1:0-1285 2839:1286-1410 11722:1411-2052 2964:2053-4962]	4963	Pkinase_Tyr|Pkinase_C	CBZ54290.1	729	Pkinase	Neospora caninum Liverpool	CBM20	NO	NO
comp9627_c0_seq30 len=4786 path=[5747:0-139 5954:140-1671 11600:1672-1732 7486:1733-1908 12547:1909-1961 7662:1962-3664 9365:3665-4711 10412:4712-4782 10483:4783-4785]	4786	n/a	BAE93687.1	1213	Glyco_hydro_66	Streptococcus criceti E49	GH66	n/a	NO	3.2.1.11	Q1MVS0
comp9627_c0_seq30 len=4786 path=[5747:0-139 5954:140-1671 11600:1672-1732 7486:1733-1908 12547:1909-1961 7662:1962-3664 9365:3665-4711 10412:4712-4782 10483:4783-4785]	4786	n/a	BAG16274.1	1213	Glyco_hydro_66	Streptococcus criceti ATCC 19642	GH66	n/a	NO	3.2.1.11	A4F2S5B1Q2P0
comp9489_c0_seq2 len=3635 path=[1:0-2733 2735:2734-3216 3218:3217-3441 3443:3442-3533 3535:3534-3634]	3635	peroxidase|DUF1295	CCF45286.1	436	peroxidase	Colletotrichum higginsianum IMI 349063	AA2	NO	NO
comp9677_c0_seq4 len=4120 path=[4295:0-77 4440:78-312 4675:313-587 5161:588-734 5308:735-803 5377:804-996 5570:997-1173 5747:1174-2113 8716:2114-2194 6687:2195-3369 7862:3370-4119]	4120	Glyco_hydro_20	AAP01161.1	594	Glycohydro_20b2|Glyco_hydro_20	Fusarium venenatum	GH20	NO	NO
comp5844_c0_seq2 len=3380 path=[3261:0-2193 6544:2194-2290 5455:2291-3379]	3380	Ank_2|Ank_2|Ank_2|Ank_2|Ank_2|Ank_2|Ank_2|Ank_2|Ank_2	XP_362336.1	1732	Osmo_MPGsynth|Ank_2|Ank_2	Magnaporthe grisea 70-15	GT55	NO	NO
comp5289_c0_seq2 len=680 path=[540:0-162 1101:163-280 703:281-679]	680	FAD_binding_4	BAM73633.1	471	FAD_binding_4	Streptomyces sp. WK-5344	AA7	YES	NO
comp9319_c0_seq2 len=2362 path=[2340:0-547 2888:548-922 3263:923-1471 3812:1472-1472 3813:1473-1533 3874:1534-2361]	2362	ATE_C|ATE_N	ADX07294.1	753	Cu-oxidase_3|Cu-oxidase|Cu-oxidase_2	Flammulina velutipes KACC 42777	AA1	NO	NO
comp4641_c0_seq1 len=2936 path=[2963:0-2836 5800:2837-2887 5851:2888-2935]	2936	Ank_2|Ank_2|Ank_2	XP_362336.1	1732	Osmo_MPGsynth|Ank_2|Ank_2	Magnaporthe grisea 70-15	GT55	NO	NO
comp16345_c0_seq1 len=1271 path=[1249:0-1270]	1271	adh_short_C2|KR|adh_short	EAA62552.1	1087	Glyco_hydro_92|adh_short_C2	Aspergillus nidulans FGSC A4	GH92	NO	YES		Q5B238
comp9143_c0_seq4 len=3994 path=[1:0-692 694:693-729 731:730-754 10219:755-2106 11634:2107-2929 14211:2930-2973 12457:2974-2989 12473:2990-3894 13378:3895-3993]	3994	Ank_2|Ank_2	XP_362336.1	1732	Osmo_MPGsynth|Ank_2|Ank_2	Magnaporthe grisea 70-15	GT55	NO	NO
comp7747_c0_seq1 len=1436 path=[1:0-394 396:395-864 866:865-1435]	1436	Glyco_hydro_72	EAA61843.1	468	Glyco_hydro_72	Aspergillus nidulans FGSC A4	GH72	YES	NO		C8VC11Q5AVM3
comp8263_c0_seq5 len=4606 path=[4975:0-3614 8590:3615-3687 8663:3688-4333 9652:4334-4442 9809:4443-4605]	4606	COesterase|MFS_1	NP_000656.1	628	COesterase|AChE_tetra	Homo sapiens	CE10	NO	NO	3.1.1.7	P22303
comp4731_c0_seq1 len=1311 path=[1289:0-1205 2495:1206-1310]	1311	GMC_oxred_N|GMC_oxred_N	CAK42323.1	615	GMC_oxred_N|GMC_oxred_C	Aspergillus niger CBS 513.88	AA3	NO	NO
comp9567_c0_seq5 len=1543 path=[1:0-266 268:267-690 692:691-1511 10074:1512-1513 1515:1514-1542]	1543	FAD_binding_4	AFT99467.1	495	FAD_binding_4	Nocardia brasiliensis ATCC 700358 HUJEG-1	AA7	YES	NO
comp8494_c0_seq2 len=5957 path=[1:0-2101 2103:2102-2707 2711:2708-3842 3846:3843-4159 4163:4160-4233 4237:4234-5945 5949:5946-5956]	5957	Peptidase_S9|DPPIV_N|DPPIV_N|HET	NP_593970.1	807	DPPIV_N|Peptidase_S9	Schizosaccharomyces pombe 972h-	CE10	NO	NO		O14073
comp9143_c0_seq8 len=3934 path=[1:0-692 694:693-729 731:730-754 10219:755-2106 11634:2107-2929 12473:2930-3834 13378:3835-3933]	3934	Ank_2|Ank_2	XP_362336.1	1732	Osmo_MPGsynth|Ank_2|Ank_2	Magnaporthe grisea 70-15	GT55	NO	NO
comp9416_c0_seq8 len=4742 path=[4773:0-210 4984:211-307 5081:308-526 5353:527-4741]	4742	Ank_2|Ank_2|Ank_2|Ank_2|Ank_2|Ank_2|Ank_2|Ank_2|Ank_2|Ank_4|Ank_2|OST-HTH|NYN	XP_362336.1	1732	Osmo_MPGsynth|Ank_2|Ank_2	Magnaporthe grisea 70-15	GT55	NO	NO
comp8160_c0_seq6 len=3135 path=[7368:0-36 23:37-790 7627:791-791 778:792-1647 1634:1648-3134]	3135	MFS_1|eIF-1a|ALG3	AEO60805.1	459	ALG3	Myceliophthora thermophila ATCC 42464	GT58	NO	NO
comp6234_c0_seq2 len=1864 path=[5197:0-1446 4804:1447-1451 4803:1452-1452 9941:1453-1475 4832:1476-1863]	1864	n/a	XP_362244.1	NA	n/a	Magnaporthe grisea 70-15	GH17	n/a	n/a		G4MRA6
comp9541_c0_seq18 len=7263 path=[7494:0-564 8132:565-817 8385:818-911 8479:912-994 8562:995-1369 9178:1370-1504 15362:1505-1565 9313:1566-7262]	7263	MFS_1|TRI12|DEAD|Helicase_C	CAL53384.1	1058	DEAD|Helicase_C|LpxC	Ostreococcus tauri OTTH0595	CE11	NO	NO		Q017M7
comp2782_c0_seq1 len=2446 path=[1:0-2445]	2446	FAD_binding_4	AGF65600.1	474	FAD_binding_4|BBE	Streptomyces hygroscopicus subsp. jinggangensis TL01	AA7	NO	NO
comp8359_c1_seq2 len=490 path=[1014:0-59 1074:60-297 1424:298-377 1312:378-489]	490	n/a	AEO69988.1	524	Glyco_tranf_2_3	Thielavia terrestris NRRL 8126	GT2	n/a	YES
comp9346_c0_seq10 len=5682 path=[6157:0-419 6577:420-454 6612:455-622 6780:623-956 7114:957-1082 7737:1083-5681]	5682	Frag1|p450	EAA66095.1	845	p450	Aspergillus nidulans FGSC A4	GT34	NO	NO		Q5BGV8
comp7647_c0_seq4 len=4390 path=[3935:0-2185 6121:2186-3248 8729:3249-3304 7184:3305-3432 7312:3433-3567 8332:3568-3944 7447:3945-4389]	4390	n/a	AEO59235.1	NA	n/a	Myceliophthora thermophila ATCC 42464	CBM48	n/a	n/a
comp9627_c0_seq8 len=5474 path=[5747:0-139 5887:140-206 5954:207-1738 7486:1739-1914 7662:1915-3617 9365:3618-4664 10412:4665-4735 10483:4736-4738 10486:4739-5136 11826:5137-5212 10884:5213-5473]	5474	RRM_1	BAE93687.1	1213	Glyco_hydro_66	Streptococcus criceti E49	GH66	NO	NO	3.2.1.11	Q1MVS0
comp9627_c0_seq8 len=5474 path=[5747:0-139 5887:140-206 5954:207-1738 7486:1739-1914 7662:1915-3617 9365:3618-4664 10412:4665-4735 10483:4736-4738 10486:4739-5136 11826:5137-5212 10884:5213-5473]	5474	RRM_1	BAG16274.1	1213	Glyco_hydro_66	Streptococcus criceti ATCC 19642	GH66	NO	NO	3.2.1.11	A4F2S5B1Q2P0
comp5960_c0_seq1 len=1182 path=[1:0-1181]	1182	HAD_2|Hydrolase	AFZ01159.1	970	Glyco_hydro_65N|Glyco_hydro_65m|HAD_2	Calothrix sp. PCC 6303	GH65	NO	YES
comp3969_c0_seq1 len=8040 path=[1:0-7391 7393:7392-8039]	8040	Glyco_hydro_47|Ank_2|Ank_2|Ank_2|Ank_2|Ank_2|Ank_2|Ank_2|Ank_2	CAY09757.1	558	Glyco_hydro_47	Fusarium graminearum PH-1	GH47	NO	NO
[truncated: 3,389 more rows]
